# Supplementary material for: A RNA-Seq Analysis of the Rat Supraoptic Nucleus Transcriptome: Effects of Salt Loading on Gene Expression
Source: PLoS One. 2015 Apr 21;10(4):e0124523. doi: 10.1371/journal.pone.0124523 (PMC4405539; doi:10.1371/journal.pone.0124523)
Supplement: S6 Table — (XLS) [file pone.0124523.s015.xls]

## Sheet: Table_S6
Table S6. 9,709 RNA-seq genes present in Con and/or SL SON
Gene_Index_ID	RN5_Gene_Symbol	Gene_Chr	Gene_Chr_Location	Gene_Length	Control1	Control2	Control3	SL1	SL2	SL3	Control_Mean	Control_SD	SL_Mean	SL_SD	Ingenuity_Symbol	Ingenuity_Description	Ingenuity_Location	Ingenuity_Type	Intersection_Class
G10000	Mrps15	5	147824053..147834646	10594	4.10417	4.15529	4.29	4.2302	4.42775	4.28334	4.18316	0.0959981	4.31376	0.102228	MRPS15	mitochondrial ribosomal protein S15	Cytoplasm	other	Common_Between_RNAseq_&_Microarray
G10001	Oscp1	5	147837067..147867531	30465	7.05187	7.12253	7.03697	6.48187	6.85011	6.6647	7.07046	0.0457052	6.66556	0.184121	OSCP1	organic solute carrier partner 1	Extracellular Space	other	RNAseq_Specific
G10002	Lsm10	5	147876338..147878244	1907	3.91032	3.96404	3.7763	3.64524	3.71664	3.715	3.88355	0.0966901	3.69229	0.0407601	LSM10	LSM10, U7 small nuclear RNA associated	Nucleus	other	RNAseq_Specific
G10003	Stk40	5	147883548..147920182	36635	4.3367	4.22019	4.37166	4.59006	4.43344	4.74631	4.30952	0.0793089	4.58994	0.156434	STK40	serine/threonine kinase 40	Cytoplasm	kinase	Common_Between_RNAseq_&_Microarray
G10006	Thrap3	5	complement(147947769..147989301)	41533	5.67412	5.64918	5.5812	5.81903	5.7108	5.70846	5.63483	0.0480934	5.7461	0.0631709	THRAP3	thyroid hormone receptor associated protein 3	Nucleus	transcription regulator	Common_Between_RNAseq_&_Microarray
G10007	Map7d1	5	complement(148018369..148042648)	24280	5.80825	5.55305	5.34744	5.80774	5.68046	6.0187	5.56958	0.230853	5.83563	0.170834	MAP7D1	MAP7 domain containing 1	Other	other	Common_Between_RNAseq_&_Microarray
G10008	Trappc3	5	148049331..148062968	13638	5.85624	5.83352	5.8287	5.48428	5.63981	5.54272	5.83949	0.0147048	5.55561	0.0785594	TRAPPC3	trafficking protein particle complex 3	Cytoplasm	other	Common_Between_RNAseq_&_Microarray
G10010	Adprhl2	5	complement(148103569..148108843)	5275	4.75116	4.69909	4.75224	4.57471	4.52988	4.57774	4.73416	0.0303756	4.56077	0.0268005	ADPRHL2	ADP-ribosylhydrolase like 2	Cytoplasm	enzyme	Common_Between_RNAseq_&_Microarray
G10017	Psmb2	5	148472364..148504751	32388	6.40599	6.41979	6.49896	6.51846	6.66071	6.53752	6.44158	0.0501695	6.57223	0.0772157	PSMB2	proteasome (prosome, macropain) subunit, beta type, 2	Cytoplasm	peptidase	Common_Between_RNAseq_&_Microarray
G10019	Ncdn	5	complement(148539983..148549743)	9761	6.17233	6.06641	5.99706	6.41498	6.26275	6.42844	6.0786	0.0882658	6.36872	0.0920205	NCDN	neurochondrin	Cytoplasm	other	Common_Between_RNAseq_&_Microarray
G10020	AU040320	5	148550212..148642557	92346	5.42319	5.40253	5.32979	5.53372	5.44142	5.71534	5.38517	0.0490583	5.56349	0.139365
G10021	Zmym4	5	complement(148648498..148766683)	118186	3.95521	4.0476	3.92277	3.86509	3.86953	3.72978	3.97519	0.0647713	3.82146	0.0794346	ZMYM4	zinc finger, MYM-type 4	Other	other	Common_Between_RNAseq_&_Microarray
G10025	Sfpq	5	148850564..148858900	8337	5.50969	5.60615	5.62059	5.93534	5.91886	5.88984	5.57881	0.060289	5.91468	0.0230383	SFPQ	splicing factor proline/glutamine-rich	Nucleus	other	Common_Between_RNAseq_&_Microarray
G10026	Zmym1	5	complement(148876980..148894226)	17247	3.33893	3.33678	3.40788	3.38179	3.46192	3.41672	3.3612	0.0404411	3.42014	0.0401718	ZMYM1	zinc finger, MYM-type 1	Other	other	RNAseq_Specific
G10027	Zmym6	5	148909099..148956295	47197	4.00773	3.9769	4.16254	3.67318	3.74277	3.56952	4.04906	0.0994805	3.66183	0.0871796	ZMYM6	zinc finger, MYM-type 6	Nucleus	other	Common_Between_RNAseq_&_Microarray
G10028	Zmym6nb	5	148958175..148961378	3204	3.82442	3.80287	4.01223	3.63193	3.85917	4.09192	3.87984	0.115157	3.86101	0.230003	ZMYM6NB	ZMYM6 neighbor	Other	other	Common_Between_RNAseq_&_Microarray
G10029	Dlgap3	5	149027227..149073369	46143	4.16374	4.196	3.98832	4.03179	3.98424	4.06149	4.11602	0.11176	4.02584	0.038971	DLGAP3	discs, large (Drosophila) homolog-associated protein 3	Cytoplasm	other	RNAseq_Specific
G10030	Smim12	5	149083705..149083983	279	5.03391	4.69132	4.77902	4.91502	5.11055	5.10951	4.83475	0.17796	5.04503	0.112591	SMIM12	small integral membrane protein 12	Other	other	Common_Between_RNAseq_&_Microarray
G10031	Gja4	5	complement(149142704..149145235)	2532	3.02749	3	3	3.02394	3.00164	3.31741	3.00916	0.0158697	3.11433	0.176223	GJA4	gap junction protein, alpha 4, 37kDa	Plasma Membrane	transporter	Common_Between_RNAseq_&_Microarray
G10038	RGD1563072	5	150080050..150084713	4664	5.71836	5.58736	5.75556	5.86592	5.65578	5.47473	5.68709	0.0883474	5.66547	0.195773	C1orf216	chromosome 1 open reading frame 216	Other	other	Common_Between_RNAseq_&_Microarray
G10043	Phc2	5	150620498..150668954	48457	4.98595	4.91333	4.97771	4.65133	4.70631	4.71346	4.959	0.0397604	4.69037	0.0339933	PHC2	polyhomeotic homolog 2 (Drosophila)	Nucleus	other	Common_Between_RNAseq_&_Microarray
G10045	Zfp362	5	complement(150689530..150711442)	21913	3.2077	3.29404	3.17934	3	3	3	3.22703	0.0597405	3	0	ZNF362	zinc finger protein 362	Other	other	RNAseq_Specific
G10048	RGD1562178	5	150910956..150929525	18570	3.48393	3.45206	3.53889	3.48716	3.50631	3.64121	3.49162	0.043925	3.54489	0.0839582	RGD1562178	similar to Adenylate kinase 2	Other	other	RNAseq_Specific
G10049	Rnf19b	5	150992439..151005653	13215	4.57864	4.51922	4.6453	4.57834	4.70244	4.72874	4.58105	0.0630742	4.66984	0.0803264	Rnf19b	ring finger protein 19B	Cytoplasm	other	Common_Between_RNAseq_&_Microarray
G10052	Fndc5	5	151057693..151062818	5126	3.99377	3.83201	3.65787	3.69736	3.3644	3.29551	3.82788	0.167988	3.45242	0.214902	FNDC5	fibronectin type III domain containing 5	Other	other	Common_Between_RNAseq_&_Microarray
G10053	S100pbp	5	complement(151069683..151109626)	39944	4.34027	4.29884	4.06626	4.43778	4.29957	4.19008	4.23512	0.147696	4.30914	0.124126	S100PBP	S100P binding protein	Nucleus	other	Common_Between_RNAseq_&_Microarray
G10054	Yars	5	151109967..151138472	28506	5.41426	5.35187	5.41898	6.13453	6.03507	6.25578	5.39504	0.03746	6.1418	0.110534	YARS	tyrosyl-tRNA synthetase	Cytoplasm	enzyme	Common_Between_RNAseq_&_Microarray
G10057	Sync	5	151209094..151231142	22049	3.69791	3.74061	3.96126	3.52828	3.64005	3.41128	3.79993	0.141341	3.52654	0.114394	SYNC	syncoilin, intermediate filament protein	Cytoplasm	other	RNAseq_Specific
G10058	Rbbp4	5	complement(151232122..151256539)	24418	5.87946	5.92825	6.02303	5.70777	5.81134	5.74403	5.94358	0.0730025	5.75438	0.052555	RBBP4	retinoblastoma binding protein 4	Nucleus	enzyme	Common_Between_RNAseq_&_Microarray
G10059	Zbtb8os	5	151257317..151268014	10698	4.27818	4.07487	4.44904	4.56404	4.602	4.52956	4.26736	0.18732	4.5652	0.0362327	Zbtb8os	zinc finger and BTB domain containing 8 opposite strand	Other	other	Common_Between_RNAseq_&_Microarray
G1006	Eif3k	1	complement(89103168..89108197)	5030	5.41948	5.37257	5.9241	5.1533	5.30076	5.10909	5.57205	0.305784	5.18771	0.100363	EIF3K	eukaryotic translation initiation factor 3, subunit K	Cytoplasm	translation regulator	Common_Between_RNAseq_&_Microarray
G10064	Bsdc1	5	151382663..151410825	28163	6.04494	6.0398	5.96139	5.72315	5.75007	5.75729	6.01538	0.046823	5.7435	0.017993	BSDC1	BSD domain containing 1	Other	other	Common_Between_RNAseq_&_Microarray
G10069	Hdac1	5	complement(151445686..151472652)	26967	5.06832	5.17762	5.11596	4.81256	4.82655	4.73876	5.12063	0.0548027	4.79262	0.0471689	HDAC1	histone deacetylase 1	Nucleus	transcription regulator	RNAseq_Specific
G10072	Eif3i	5	complement(151525930..151532743)	6814	5.83555	5.76765	5.93793	5.63764	5.93404	5.90761	5.84704	0.0857217	5.82643	0.164033	Eif3i	eukaryotic translation initiation factor 3, subunit I	Other	translation regulator	Common_Between_RNAseq_&_Microarray
G10073	Tmem234	5	151532921..151541216	8296	3.4704	3.50945	3.61846	3.44876	3.52581	3.50694	3.53277	0.0767394	3.49384	0.0401566	Tmem234	transmembrane protein 234	Other	other	RNAseq_Specific
G10076	Ccdc28b	5	complement(151552470..151556886)	4417	3.57133	3.56831	3.50375	3.02394	3.46454	3.31449	3.5478	0.0381756	3.26765	0.223998	Ccdc28b	coiled coil domain containing 28B	Cytoplasm	other	RNAseq_Specific
G10077	Txlna	5	complement(151561492..151575118)	13627	4.00773	3.97278	3.87198	4.01223	3.78365	3.97049	3.95083	0.0704871	3.92212	0.121725	Txlna	taxilin alpha	Cytoplasm	other	RNAseq_Specific
G10078	Kpna6	5	complement(151581763..151594918)	13156	3.73193	3.65843	3.21391	3.74655	3.67489	3.68395	3.53475	0.280279	3.7018	0.0390189	KPNA6	karyopherin alpha 6 (importin alpha 7)	Nucleus	transporter	RNAseq_Specific
G10079	Tmem39b	5	complement(151617692..151634824)	17133	3.73031	3.51765	3.71391	3.3203	3.4375	3.43883	3.65395	0.118327	3.39888	0.0680521	Tmem39b	transmembrane protein 39b	Other	other	RNAseq_Specific
G10080	Khdrbs1	5	complement(151655537..151680547)	25011	6.00764	5.97108	5.99072	5.91886	5.86579	5.80697	5.98981	0.0182969	5.86387	0.0559732	KHDRBS1	KH domain containing, RNA binding, signal transduction associated 1	Nucleus	transcription regulator	Common_Between_RNAseq_&_Microarray
G10081	PTP4A2	5	151775119..151784416	9298	5.75942	5.84323	5.75942	6.44774	6.42324	6.36919	5.78736	0.0483854	6.41339	0.0401904	PTP4A2	protein tyrosine phosphatase type IVA, member 2	Cytoplasm	phosphatase	Common_Between_RNAseq_&_Microarray
G10082	Bai2	5	151919830..151950961	31132	3.92749	3.86904	3.74116	3.17855	3.07878	3.02394	3.8459	0.095297	3.09376	0.0783861	BAI2	brain-specific angiogenesis inhibitor 2	Plasma Membrane	G-protein coupled receptor	Common_Between_RNAseq_&_Microarray
G10084	Pef1	5	152039075..152062360	23286	5.43309	5.41137	5.38211	5.44904	5.32836	5.4976	5.40886	0.0255808	5.425	0.0871456	PEF1	penta-EF-hand domain containing 1	Cytoplasm	other	Common_Between_RNAseq_&_Microarray
G10088	Serinc2	5	complement(152187838..152210009)	22172	3	3	3	3	3	3.51703	3	0	3.17234	0.298509	SERINC2	serine incorporator 2	Plasma Membrane	transporter	Common_Between_RNAseq_&_Microarray
G10089	Fabp3	5	152246244..152253006	6763	5.45036	5.46741	5.86356	6.64082	6.65585	6.85671	5.59378	0.233796	6.71779	0.120539	FABP3	fatty acid binding protein 3, muscle and heart (mammary-derived growth inhibitor)	Cytoplasm	transporter	Common_Between_RNAseq_&_Microarray
G10090	Zcchc17	5	complement(152252915..152294518)	41604	5.01413	4.94081	5.07991	5.08269	5.12094	5.04269	5.01162	0.0695826	5.08211	0.0391309	ZCCHC17	zinc finger, CCHC domain containing 17	Nucleus	other	Common_Between_RNAseq_&_Microarray
G10091	Snrnp40	5	152294724..152327111	32388	4.70244	4.64299	4.7798	4.33422	4.59812	4.43744	4.70841	0.0686019	4.45659	0.13299	SNRNP40	small nuclear ribonucleoprotein 40kDa (U5)	Nucleus	other	Common_Between_RNAseq_&_Microarray
G10093	Nkain1	5	152374954..152381791	6838	3	3	3	3	3.04157	3.17217	3	0	3.07125	0.0898364	NKAIN1	Na+/K+ transporting ATPase interacting 1	Other	other	RNAseq_Specific
G10094	Pum1	5	152491280..152616529	125250	4.03573	4.08382	4.02737	3.95802	4.0055	3.94309	4.04897	0.0304685	3.96887	0.0325867	PUM1	pumilio RNA-binding family member 1	Cytoplasm	other	Common_Between_RNAseq_&_Microarray
G10095	SDC3	5	152628005..152658676	30672	4.80742	4.69993	4.39964	4.67701	4.35339	4.49646	4.63567	0.211348	4.50895	0.162169	SDC3	syndecan 3	Plasma Membrane	other	Common_Between_RNAseq_&_Microarray
G10096	Laptm5	5	152749594..152771632	22039	3.37973	3.40652	3.20614	3.22708	3.27852	3.29037	3.3308	0.108783	3.26532	0.0336434	LAPTM5	lysosomal protein transmembrane 5	Plasma Membrane	other	Common_Between_RNAseq_&_Microarray
G10099	Mecr	5	153680464..153705789	25326	3.51829	3.3658	3.47106	3.46323	3.54997	3.37415	3.45172	0.078065	3.46245	0.0879123	MECR	mitochondrial trans-2-enoyl-CoA reductase	Cytoplasm	enzyme	RNAseq_Specific
G101	Hbs1l	1	17974955..18051508	76554	5.59664	5.64472	5.55735	5.62688	5.56071	5.58961	5.59957	0.0437601	5.5924	0.033169	HBS1L	HBS1-like (S. cerevisiae)	Cytoplasm	translation regulator	Common_Between_RNAseq_&_Microarray
G1010	FAM98C	1	complement(89270394..89273938)	3545	3.59959	3.67489	3.71554	3.42346	3.58401	3.57499	3.66334	0.0588306	3.52749	0.0902063	FAM98C	family with sequence similarity 98, member C	Other	other	RNAseq_Specific
G10100	Srsf4	5	153711721..153739487	27767	4.92143	4.81178	5.11451	4.69993	4.7401	4.70493	4.94924	0.153267	4.71499	0.0218942	SRSF4	serine/arginine-rich splicing factor 4	Nucleus	other	Common_Between_RNAseq_&_Microarray
G10102	Epb4.1	5	complement(153762345..153894181)	131837	3.48524	3.17536	3.37902	3.4268	3.37902	3.46387	3.34654	0.157471	3.42323	0.0425369	EPB41	erythrocyte membrane protein band 4.1 (elliptocytosis 1, RH-linked)	Plasma Membrane	other	Common_Between_RNAseq_&_Microarray
G10104	Ythdf2	5	complement(154038417..154062397)	23981	4.50281	4.67786	4.57411	4.90855	4.91835	4.87158	4.58493	0.0880237	4.89949	0.0246643	YTHDF2	YTH domain family, member 2	Other	other	Common_Between_RNAseq_&_Microarray
G10106	Taf12	5	154126886..154141447	14562	3.11338	3.13818	3.17855	3.67828	3.70619	3.68953	3.14337	0.0328945	3.69133	0.0140413	Taf12	TAF12 RNA polymerase II, TATA box binding protein (TBP)-associated factor	Nucleus	transcription regulator	RNAseq_Specific
G10107	Trnau1ap	5	complement(154159835..154173989)	14155	4.87552	4.85893	4.96321	4.45529	4.56193	4.58916	4.89922	0.0560329	4.53546	0.0707524	Trnau1ap	tRNA selenocysteine 1 associated protein 1	Nucleus	other	Common_Between_RNAseq_&_Microarray
G1011	Spred3	1	complement(89279385..89288184)	8800	3	3.03015	3.32316	3.96033	3.77524	3.84664	3.11777	0.178511	3.86074	0.093347	SPRED3	sprouty-related, EVH1 domain containing 3	Extracellular Space	cytokine	RNAseq_Specific
G10110	Med18	5	complement(154313151..154313705)	555	3.10502	3.5044	3.65444	3.03105	3.2763	3.33535	3.42128	0.283979	3.21423	0.161366
G10111	Sesn2	5	complement(154351310..154370252)	18943	3	3.01595	3	3.94027	3.44876	4.34063	3.00532	0.00921071	3.90989	0.446708	SESN2	sestrin 2	Cytoplasm	other	Common_Between_RNAseq_&_Microarray
G10112	Atpif1	5	complement(154387824..154391541)	3718	7.69136	7.73929	7.80907	7.76863	7.83594	7.85016	7.74657	0.0591929	7.81824	0.0435518	ATPIF1	ATPase inhibitory factor 1	Cytoplasm	other	Common_Between_RNAseq_&_Microarray
G10113	Dnajc8	5	154393926..154411983	18058	5.77583	5.71534	5.80593	5.51712	5.61088	5.64068	5.7657	0.0461381	5.58956	0.0644803	DNAJC8	DnaJ (Hsp40) homolog, subfamily C, member 8	Nucleus	other	Common_Between_RNAseq_&_Microarray
G10116	Eya3	5	154501299..154581358	80060	3.16898	3.20147	3.13161	3.40857	3.30796	3.38526	3.16735	0.0349583	3.36726	0.0526654	EYA3	eyes absent homolog 3 (Drosophila)	Nucleus	phosphatase	RNAseq_Specific
G10119	Rpa2	5	154624086..154634563	10478	3.00792	3.04333	3.09578	3	3.04854	3	3.04901	0.0442068	3.01618	0.0280233	RPA2	replication protein A2, 32kDa	Nucleus	other	RNAseq_Specific
G10122	Ppp1r8	5	complement(154679818..154696564)	16747	4.44473	4.56496	4.44473	4.77134	4.69633	4.80973	4.48481	0.0694144	4.75914	0.057678	PPP1R8	protein phosphatase 1, regulatory subunit 8	Nucleus	phosphatase	Common_Between_RNAseq_&_Microarray
G10124	Stx12	5	complement(154712006..154740248)	28243	6.49824	6.62358	6.51009	6.5675	6.51175	6.47581	6.54397	0.0692012	6.51835	0.0461985	STX12	syntaxin 12	Cytoplasm	other	Common_Between_RNAseq_&_Microarray
G10125	Fam76a	5	complement(154755365..154784446)	29082	3.91751	3.96126	3.92084	3.62433	3.51577	3.58703	3.9332	0.0243544	3.57571	0.0551556	FAM76A	family with sequence similarity 76, member A	Other	other	Common_Between_RNAseq_&_Microarray
G10127	Ahdc1	5	154878646..154944310	65665	3.24546	3.25001	3.08219	3	3	3	3.19255	0.0956027	3	0	AHDC1	AT hook, DNA binding motif, containing 1	Other	other	RNAseq_Specific
G10129	ENSRNOG00000009540	5	complement(155061363..155062328)	966	3	3	3	3	3	3.27852	3	0	3.09284	0.160803	GPR3	G protein-coupled receptor 3	Plasma Membrane	G-protein coupled receptor	RNAseq_Specific
G1013	Psmd8	1	complement(89292313..89299144)	6832	6.12329	6.18953	6.17423	6.21013	6.36387	6.39763	6.16235	0.0346775	6.32388	0.0999395	PSMD8	proteasome (prosome, macropain) 26S subunit, non-ATPase, 8	Cytoplasm	other	Common_Between_RNAseq_&_Microarray
G10130	Cd164l2	5	155079244..155082300	3057	3	3	3	3	3	3.1999	3	0	3.06663	0.115411	Cd164l2	CD164 sialomucin-like 2	Other	other	RNAseq_Specific
G10133	Tmem222	5	complement(155127137..155138924)	11788	5.08951	5.02128	5.15471	4.80768	4.9006	4.84447	5.0885	0.0667183	4.85091	0.0467962	TMEM222	transmembrane protein 222	Other	other	Common_Between_RNAseq_&_Microarray
G10134	Wdtc1	5	complement(155153929..155201755)	47827	4.01177	3.83048	3.64524	3.52332	3.2977	3.54195	3.82916	0.183271	3.45432	0.135962	WDTC1	WD and tetratricopeptide repeats 1	Other	other	Common_Between_RNAseq_&_Microarray
G10137	Slc9a1	5	155237482..155290406	52925	3.7763	3.56587	3.56587	3.6255	3.55612	3.65957	3.63601	0.121488	3.61373	0.0527215	SLC9A1	solute carrier family 9, subfamily A (NHE1, cation proton antiporter 1), member 1	Plasma Membrane	ion channel	Common_Between_RNAseq_&_Microarray
G10139	Trnp1	5	complement(155371380..155372027)	648	3	3	3	3	3	3.14554	3	0	3.04851	0.0840303	TRNP1	TMF1-regulated nuclear protein 1	Nucleus	other	RNAseq_Specific
G10142	Nudc	5	complement(155443982..155457375)	13394	6.23103	6.2651	6.34509	6.32508	6.3705	6.38067	6.28041	0.0585525	6.35875	0.0296	NUDC	nudC nuclear distribution protein	Cytoplasm	other	Common_Between_RNAseq_&_Microarray
G10147	Gpn2	5	155495838..155503005	7168	4.06452	4.16254	4.10501	3.98014	4.17576	4.18889	4.11069	0.0492548	4.11493	0.116916	GPN2	GPN-loop GTPase 2	Other	other	Common_Between_RNAseq_&_Microarray
G10149	Zdhhc18	5	complement(155520908..155546083)	25176	4.90179	4.9035	4.76445	4.85174	4.9076	4.8467	4.85658	0.0797914	4.86868	0.0338005	ZDHHC18	zinc finger, DHHC-type containing 18	Other	enzyme	RNAseq_Specific
G10151	Arid1a	5	complement(155592619..155635649)	43031	4.20502	4.23863	4.17097	4.05718	4.02914	4.03705	4.20487	0.033829	4.04113	0.0144584	ARID1A	AT rich interactive domain 1A (SWI-like)	Nucleus	transcription regulator	Common_Between_RNAseq_&_Microarray
G10153	Rps6ka1	5	complement(155760612..155805563)	44952	3.05205	3.17298	3.12996	3.24775	3.18964	3.32533	3.11833	0.0612966	3.25424	0.0680789	RPS6KA1	ribosomal protein S6 kinase, 90kDa, polypeptide 1	Cytoplasm	kinase	RNAseq_Specific
G10155	Dhdds	5	complement(155884756..155912508)	27753	5.78476	5.6932	5.71094	5.45036	5.53823	5.48719	5.72964	0.0485559	5.49193	0.0441237	DHDDS	dehydrodolichyl diphosphate synthase	Other	enzyme	Common_Between_RNAseq_&_Microarray
G1016	Zfp383	1	89366831..89382279	15449	4.09192	4.14514	4.23518	3.83099	3.9065	3.8111	4.15741	0.0724129	3.84953	0.0503292	ZNF383	zinc finger protein 383	Cytoplasm	other	Common_Between_RNAseq_&_Microarray
G10160	Ftl	5	156011825..156012739	915	4.40033	4.34204	4.53173	4.56983	4.76949	4.68068	4.4247	0.0971631	4.67334	0.100031
G10162	Ubxn11	5	156019009..156042873	23865	4.00368	4.01537	3.93458	3.43551	3.65387	3.56831	3.98454	0.0436622	3.55256	0.110031	UBXN11	UBX domain protein 11	Cytoplasm	other	RNAseq_Specific
G10163	Sh3bgrl3	5	complement(156043499..156044872)	1374	6.40608	6.20153	6.58007	6.77729	6.97797	7.29772	6.39589	0.189472	7.01766	0.262476	SH3BGRL3	SH3 domain binding glutamic acid-rich protein like 3	Nucleus	other	Common_Between_RNAseq_&_Microarray
G10164	Cep85	5	complement(156045929..156165672)	119744	3.4717	3.32533	3.388	3.2636	3.17855	3.24166	3.39501	0.0734325	3.22794	0.044151	CEP85	centrosomal protein 85kDa	Nucleus	other	RNAseq_Specific
G10180	Stmn1	5	156466729..156472404	5676	9.44557	9.59495	9.63974	9.13254	9.13254	9.12337	9.56009	0.101673	9.12948	0.00529567	STMN1	stathmin 1	Cytoplasm	other	Common_Between_RNAseq_&_Microarray
G10181	Paqr7	5	156503752..156504789	1038	5.3339	5.25787	5.14679	5.08162	5.06768	5.02683	5.24619	0.0941011	5.05871	0.028478	PAQR7	progestin and adipoQ receptor family member VII	Plasma Membrane	other	RNAseq_Specific
G10183	Mtfr1l	5	complement(156522183..156532186)	10004	5.40049	5.45102	5.40492	5.39588	5.53356	5.49313	5.41881	0.0279828	5.47419	0.07077	MTFR1L	mitochondrial fission regulator 1-like	Other	other	Common_Between_RNAseq_&_Microarray
G10184	Sepn1	5	complement(156535882..156547763)	11882	4.06669	3.91751	3.61846	4.00324	3.66127	3.79767	3.86755	0.228249	3.82073	0.172147	SEPN1	selenoprotein N, 1	Cytoplasm	other	Common_Between_RNAseq_&_Microarray
G10185	Man1c1	5	complement(156559978..156703434)	143457	3.41536	3.40243	3.32819	3.29037	3.32819	3.41266	3.38199	0.0470449	3.34374	0.0626105	MAN1C1	mannosidase, alpha, class 1C, member 1	Cytoplasm	enzyme	Common_Between_RNAseq_&_Microarray
G10187	Tmem57	5	complement(156896212..156958442)	62231	5.15067	5.18421	5.15249	5.4723	5.46888	5.46187	5.16246	0.0188624	5.46768	0.00531698	TMEM57	transmembrane protein 57	Nucleus	other	Common_Between_RNAseq_&_Microarray
G10189	Tmem50a	5	complement(157006370..157021310)	14941	6.45245	6.60014	6.56277	6.21781	6.37059	6.2463	6.53845	0.0767896	6.27824	0.0812416	TMEM50A	transmembrane protein 50A	Plasma Membrane	other	Common_Between_RNAseq_&_Microarray
G10190	RGD1359529	5	157029893..157033632	3740	8.38667	8.29801	8.4126	8.03082	7.99205	7.89904	8.36576	0.0600858	7.97397	0.067724	C1orf63	chromosome 1 open reading frame 63	Other	other	Common_Between_RNAseq_&_Microarray
G10191	Syf2	5	157038590..157046520	7931	5.86901	5.8157	5.87455	5.9046	6.02967	6.06974	5.85309	0.0324935	6.00134	0.0861363	SYF2	SYF2 pre-mRNA-splicing factor	Nucleus	other	Common_Between_RNAseq_&_Microarray
G10194	Clic4	5	complement(157335185..157394574)	59390	5.00966	5.05619	5.04159	5.08481	5.01771	5.16704	5.03581	0.023799	5.08985	0.0747923	CLIC4	chloride intracellular channel 4	Plasma Membrane	ion channel	Common_Between_RNAseq_&_Microarray
G10195	Srrm1	5	complement(157444419..157476909)	32491	5.39895	5.37396	5.47278	5.16723	5.1327	5.08034	5.41523	0.0513842	5.12676	0.0437505	SRRM1	serine/arginine repetitive matrix 1	Nucleus	other	Common_Between_RNAseq_&_Microarray
G10197	Rcan3	5	complement(157542942..157551147)	8206	3.44016	3.55303	3	3.54134	3.20301	3.49928	3.33106	0.292212	3.41454	0.184398	RCAN3	RCAN family member 3	Other	other	RNAseq_Specific
G10199	Nipal3	5	complement(157571436..157606377)	34942	5.17523	5.27694	4.78719	5.04356	4.69549	4.48298	5.07979	0.258447	4.74068	0.283006	NIPAL3	NIPA-like domain containing 3	Other	other	RNAseq_Specific
G10208	Srsf10	5	157970240..157978639	8400	5.29803	5.17542	5.11222	5.14679	4.92665	4.74982	5.19523	0.0944749	4.94109	0.198879	Srsf10	serine/arginine-rich splicing factor 10	Nucleus	other	RNAseq_Specific
G10209	Pnrc2	5	complement(157985391..157988374)	2984	5.31807	5.42756	5.33462	5.21693	5.38814	5.26163	5.36008	0.0590186	5.2889	0.088806	PNRC2	proline-rich nuclear receptor coactivator 2	Nucleus	other	Common_Between_RNAseq_&_Microarray
G10211	Fuca1	5	158034147..158051396	17250	5.37725	5.19722	5.31245	5.284	5.14088	5.22022	5.29564	0.0911822	5.21504	0.0717038	FUCA1	fucosidase, alpha-L- 1, tissue	Cytoplasm	enzyme	Common_Between_RNAseq_&_Microarray
G10212	Hmgcl	5	158059688..158073434	13747	3.62256	3.4375	3.52332	3.42076	3.60374	3.78939	3.52779	0.0926108	3.60463	0.184315	HMGCL	3-hydroxymethyl-3-methylglutaryl-CoA lyase	Cytoplasm	enzyme	Common_Between_RNAseq_&_Microarray
G10213	Gale	5	158075304..158079806	4503	3.05291	3	3	3.3997	3.55914	3.73737	3.01764	0.0305453	3.5654	0.168922	GALE	UDP-galactose-4-epimerase	Cytoplasm	enzyme	RNAseq_Specific
G10214	Lypla2	5	complement(158079858..158084485)	4628	5.57456	5.49489	5.53559	5.40134	5.539	5.53559	5.53501	0.0398378	5.49198	0.0785131	LYPLA2	lysophospholipase II	Cytoplasm	enzyme	Common_Between_RNAseq_&_Microarray
G10215	Pithd1	5	complement(158088178..158097818)	9641	6.50874	6.45352	6.37007	6.37007	6.27863	6.32625	6.44411	0.0698158	6.32498	0.0457295	PITHD1	PITH (C-terminal proteasome-interacting domain of thioredoxin-like) domain containing 1	Other	other	Common_Between_RNAseq_&_Microarray
G10216	Tceb3	5	complement(158112243..158128181)	15939	3.72922	3.88035	3.66921	3.97278	3.83149	3.93128	3.75959	0.108797	3.91185	0.0726231	TCEB3	transcription elongation factor B (SIII), polypeptide 3 (110kDa, elongin A)	Nucleus	transcription regulator	RNAseq_Specific
G10217	Rpl11	5	complement(158155378..158158916)	3539	8.17073	8.19014	8.24102	7.98354	8.19014	8.15679	8.20063	0.0363018	8.11016	0.110911	RPL11	ribosomal protein L11	Cytoplasm	other	Common_Between_RNAseq_&_Microarray
G10218	Id3	5	158263301..158264888	1588	5.55582	5.78933	5.86394	4.75594	5.2364	5.08418	5.73636	0.160745	5.02551	0.245546	ID3	inhibitor of DNA binding 3, dominant negative helix-loop-helix protein	Nucleus	transcription regulator	Common_Between_RNAseq_&_Microarray
G1022	Zfp566	1	complement(89576860..89600307)	23448	3.09747	3	3.03717	3	3	3	3.04488	0.0491896	3	0	ZNF566	zinc finger protein 566	Nucleus	other	RNAseq_Specific
G10222	Zfp46	5	158417871..158422371	4501	3	3	3	3.24396	3.28518	3.15123	3	0	3.22679	0.0686072	ZNF436	zinc finger protein 436	Nucleus	other	Common_Between_RNAseq_&_Microarray
G10223	Hnrnpr	5	158435421..158467206	31786	4.09489	4.12502	4.04541	4.04628	3.81368	3.81265	4.08844	0.0401951	3.89087	0.134593	HNRNPR	heterogeneous nuclear ribonucleoprotein R	Nucleus	other	Common_Between_RNAseq_&_Microarray
G10227	Luzp1	5	158664309..158673014	8706	3	3.09915	3	3.4833	3.3887	3.48524	3.03305	0.0572464	3.45241	0.0551853	LUZP1	leucine zipper protein 1	Nucleus	other	Common_Between_RNAseq_&_Microarray
G10228	Kdm1a	5	complement(158674383..158730522)	56140	5.16442	5.22795	5.24022	5.27248	5.2293	5.10218	5.21086	0.0406857	5.20132	0.0885342	KDM1A	lysine (K)-specific demethylase 1A	Nucleus	enzyme	Common_Between_RNAseq_&_Microarray
G10231	C1qb	5	complement(159008941..159014494)	5554	3.68283	3.64642	3.62141	3.26883	3.74655	3.43416	3.65022	0.0308842	3.48318	0.2426	C1QB	complement component 1, q subcomponent, B chain	Extracellular Space	other	Common_Between_RNAseq_&_Microarray
G10232	C1qc	5	complement(159017515..159021135)	3621	3	3.03807	3.02926	3	3.06157	3	3.02244	0.019927	3.02052	0.0355494	C1QC	complement component 1, q subcomponent, C chain	Extracellular Space	other	Common_Between_RNAseq_&_Microarray
G10233	C1qa	5	complement(159023754..159026611)	2858	3.76464	3.99153	3.86953	3.5395	4.12461	3.66865	3.87523	0.113553	3.77759	0.307392	C1QA	complement component 1, q subcomponent, A chain	Extracellular Space	other	Common_Between_RNAseq_&_Microarray
G10235	Zbtb40	5	complement(159109614..159144251)	34638	3.02572	3	3	3	3	3	3.00857	0.0148474	3	0	ZBTB40	zinc finger and BTB domain containing 40	Nucleus	other	RNAseq_Specific
G10237	Cdc42	5	complement(159447307..159485241)	37935	7.66819	7.68827	7.67373	7.68165	7.80649	7.70511	7.67673	0.0103717	7.73108	0.0663499	CDC42	cell division cycle 42	Cytoplasm	enzyme	Common_Between_RNAseq_&_Microarray
G1024	Zfp260	1	89623200..89626479	3280	3.88082	4.17615	4.0804	4.02871	4.20267	4.07871	4.04579	0.150674	4.10336	0.089564	ZNF260	zinc finger protein 260	Nucleus	other	Common_Between_RNAseq_&_Microarray
G10242	Usp48	5	159691521..159758705	67185	4.52488	4.56313	4.55553	4.53767	4.49295	4.4464	4.54785	0.0202487	4.49234	0.0456402	USP48	ubiquitin specific peptidase 48	Plasma Membrane	peptidase	Common_Between_RNAseq_&_Microarray
G10243	RAP1GAP	5	159782996..159829864	46869	5.89833	5.71273	5.60095	5.69502	5.52167	5.62439	5.73734	0.150207	5.6137	0.0871651	RAP1GAP	RAP1 GTPase activating protein	Cytoplasm	other	Common_Between_RNAseq_&_Microarray
G10244	Alpl	5	complement(159841923..159897413)	55491	3.57741	3.60727	3.45667	3.53267	3.60374	3.82847	3.54712	0.0797402	3.65496	0.154409	ALPL	alkaline phosphatase, liver/bone/kidney	Plasma Membrane	phosphatase	RNAseq_Specific
G10246	Ece1	5	159968569..160070310	101742	5.14822	5.19979	4.80691	5.17762	5.06205	5.25504	5.05164	0.213504	5.1649	0.0971253	ECE1	endothelin converting enzyme 1	Plasma Membrane	peptidase	Common_Between_RNAseq_&_Microarray
G10247	Eif4g3	5	160146094..160313421	167328	5.32259	5.35558	5.25164	5.46627	5.21383	5.28178	5.30994	0.0531126	5.32063	0.130631	EIF4G3	eukaryotic translation initiation factor 4 gamma, 3	Cytoplasm	translation regulator	Common_Between_RNAseq_&_Microarray
G10248	Hp1bp3	5	160336477..160358537	22061	6.22033	6.31651	6.34181	6.15036	6.06554	6.10224	6.29288	0.0640926	6.10605	0.0425344	HP1BP3	heterochromatin protein 1, binding protein 3	Nucleus	other	Common_Between_RNAseq_&_Microarray
G1025	Zfp420	1	89693361..89705585	12225	3	3.15691	3.15123	3.09071	3.30576	3.06678	3.10271	0.0889984	3.15441	0.131612	Zfp420	zinc finger protein 420	Other	other	RNAseq_Specific
G10251	Ddost	5	160417822..160424369	6548	7.90431	7.86319	7.86823	7.70935	7.69136	7.75171	7.87858	0.0224289	7.71747	0.0309833	DDOST	dolichyl-diphosphooligosaccharide--protein glycosyltransferase subunit (non-catalytic)	Cytoplasm	enzyme	Common_Between_RNAseq_&_Microarray
G10252	Pink1	5	complement(160426051..160437821)	11771	6.17263	6.03617	5.95035	5.6499	5.4497	5.56879	6.05305	0.112094	5.55613	0.100698	PINK1	PTEN induced putative kinase 1	Cytoplasm	kinase	Common_Between_RNAseq_&_Microarray
G10257	AB041806	5	160559204..160559988	785	3	3	3	3.25683	3	3.27107	3	0	3.17597	0.152557
G10259	Camk2n1	5	160625616..160627396	1781	4.499	4.6944	4.50725	4.87845	4.35269	4.34169	4.56688	0.110509	4.52428	0.306776	CAMK2N1	calcium/calmodulin-dependent protein kinase II inhibitor 1	Plasma Membrane	kinase	Common_Between_RNAseq_&_Microarray
G1027	Zfp382	1	89737854..89763846	25993	3.7847	3.65558	3.84613	3.87345	3.81265	3.9084	3.76213	0.0972552	3.86483	0.0484526	ZNF382	zinc finger protein 382	Nucleus	transcription regulator	RNAseq_Specific
G10273	Nbl1	5	complement(161263767..161274897)	11131	4.23365	4.19915	4.22712	3.87051	3.9084	3.89007	4.21997	0.0183269	3.88966	0.0189462	MINOS1-NBL1/NBL1	neuroblastoma 1, DAN family BMP antagonist	Nucleus	other	Common_Between_RNAseq_&_Microarray
G10274	Minos1	5	complement(161285672..161311999)	26328	6.73681	6.77755	6.79688	6.39754	6.69884	6.54558	6.77041	0.0306672	6.54732	0.150656	MINOS1	mitochondrial inner membrane organizing system 1	Cytoplasm	other	Common_Between_RNAseq_&_Microarray
G10275	Capzb	5	161383344..161482714	99371	7.20145	7.1676	7.09542	6.92532	6.85671	6.79038	7.15482	0.0541585	6.85747	0.0674719	CAPZB	capping protein (actin filament) muscle Z-line, beta	Cytoplasm	other	Common_Between_RNAseq_&_Microarray
G10277	Akr7a2	5	161499565..161508610	9046	4.11296	4.14065	4.15651	3.8111	3.73139	3.82696	4.13671	0.0220423	3.78982	0.0512118	AKR7A2	aldo-keto reductase family 7, member A2 (aflatoxin aldehyde reductase)	Cytoplasm	enzyme	Common_Between_RNAseq_&_Microarray
G10279	MRTO4	5	complement(161555067..161560580)	5514	4.31555	4.29884	4.2666	4.53362	4.45036	4.44473	4.29366	0.0248844	4.47624	0.0497734	MRTO4	mRNA turnover 4 homolog (S. cerevisiae)	Cytoplasm	other	Common_Between_RNAseq_&_Microarray
G10280	Emc1	5	161560620..161585938	25319	5.59962	5.57758	5.42689	5.57713	5.43008	5.4648	5.5347	0.0940095	5.49067	0.0768607	EMC1	ER membrane protein complex subunit 1	Plasma Membrane	other	Common_Between_RNAseq_&_Microarray
G10281	Ubr4	5	161587918..161695703	107786	4.95671	4.91429	5.04246	4.93468	4.79553	4.86962	4.97115	0.0652978	4.86661	0.0696249	UBR4	ubiquitin protein ligase E3 component n-recognin 4	Nucleus	enzyme	Common_Between_RNAseq_&_Microarray
G10283	Tas1r2	5	161806691..161874412	67722	3.16817	3.12585	3	3.22708	3.16493	3.2636	3.09801	0.0874735	3.21854	0.0498846	Tas1r2	taste receptor, type 1, member 2	Plasma Membrane	other	RNAseq_Specific
G10289	Arhgef10l	5	complement(162726802..162827928)	101127	4.92759	4.82327	4.70631	4.87552	4.79242	4.89384	4.81905	0.110701	4.85392	0.0540488	Arhgef10l	Rho guanine nucleotide exchange factor (GEF) 10-like	Cytoplasm	other	RNAseq_Specific
G1029	Capns1	1	complement(89809820..89815219)	5400	6.89588	7.1626	6.912	6.56277	6.81243	6.60311	6.99016	0.149556	6.65944	0.134024	CAPNS1	calpain, small subunit 1	Cytoplasm	peptidase	Common_Between_RNAseq_&_Microarray
G10290	Rcc2	5	162927687..162941028	13342	5.2827	5.28881	4.90998	5.47002	5.04203	5.32223	5.1605	0.216972	5.2781	0.217381	RCC2	regulator of chromosome condensation 2	Nucleus	other	Common_Between_RNAseq_&_Microarray
G10296	Padi2	5	163141202..163182415	41214	3.70894	3.4295	3.2763	3	3	3	3.47158	0.219366	3	0	PADI2	peptidyl arginine deiminase, type II	Cytoplasm	enzyme	Common_Between_RNAseq_&_Microarray
G10297	Sdhb	5	163197045..163217312	20268	7.40643	7.35483	7.40643	7.15193	7.23918	7.14309	7.38923	0.029791	7.17807	0.0531109	SDHB	succinate dehydrogenase complex, subunit B, iron sulfur (Ip)	Cytoplasm	enzyme	Common_Between_RNAseq_&_Microarray
G10298	Atp13a2	5	163224537..163243882	19346	6.42324	6.20408	6.14629	6.37512	6.2804	6.38956	6.25787	0.1461	6.34836	0.059299	ATP13A2	ATPase type 13A2	Cytoplasm	transporter	Common_Between_RNAseq_&_Microarray
G10299	Mfap2	5	163246454..163252003	5550	3.39833	3.27852	3.43949	3	3	3	3.37211	0.0836246	3	0	MFAP2	microfibrillar-associated protein 2	Extracellular Space	other	RNAseq_Specific
G10301	Necap2	5	complement(163302214..163314566)	12353	4.19087	4.12377	4.22442	4.05587	4.00863	3.95105	4.17969	0.0512492	4.00519	0.0524956	NECAP2	NECAP endocytosis associated 2	Cytoplasm	other	Common_Between_RNAseq_&_Microarray
G10304	SZRD1	5	complement(163350635..163375124)	24490	3.48779	3.51069	3.51577	3.73737	3.8008	3.75664	3.50475	0.014905	3.76494	0.0325197	SZRD1	SUZ RNA binding domain containing 1	Other	other	RNAseq_Specific
G1031	Polr2i	1	89844218..89845655	1438	3	3.02042	3.10502	3	3	3	3.04181	0.0556843	3	0	POLR2I	polymerase (RNA) II (DNA directed) polypeptide I, 14.5kDa	Nucleus	transcription regulator	Common_Between_RNAseq_&_Microarray
G10312	Fam131c	5	163642831..163647134	4304	4.11755	4.07871	3.50945	3.936	4.1071	4.25833	3.9019	0.340427	4.10048	0.161265	FAM131C	family with sequence similarity 131, member C	Other	other	RNAseq_Specific
G10316	Zbtb17	5	163713685..163734604	20920	3.12831	3.05379	3.37207	3.08219	3	3.16575	3.18472	0.166472	3.08265	0.0828753	ZBTB17	zinc finger and BTB domain containing 17	Nucleus	transcription regulator	Common_Between_RNAseq_&_Microarray
G10320	Slc25a34	5	complement(163890565..163894419)	3855	3	3	3	3	3.08389	3.05723	3	0	3.04704	0.0428655	SLC25A34	solute carrier family 25, member 34	Cytoplasm	other	RNAseq_Specific
G10321	Plekhm2	5	complement(163897199..163934413)	37215	4.18175	3.96311	3.95614	4.23863	4.03748	4.18095	4.03367	0.12829	4.15236	0.103577	PLEKHM2	pleckstrin homology domain containing, family M (with RUN domain) member 2	Extracellular Space	other	Common_Between_RNAseq_&_Microarray
G10322	Ddi2	5	complement(163951352..163995207)	43856	3.27779	3.30867	3.09578	3.28001	3.10252	3.22784	3.22741	0.115038	3.20345	0.0912223	DDI2	DNA-damage inducible 1 homolog 2 (S. cerevisiae)	Plasma Membrane	transporter	RNAseq_Specific
G10324	Dnajc16	5	complement(164037421..164064397)	26977	4.30541	4.38312	4.00773	4.17256	4.00683	4.04804	4.23209	0.198145	4.07581	0.0862819	DNAJC16	DnaJ (Hsp40) homolog, subfamily C, member 16	Other	other	RNAseq_Specific
G10325	Casp9	5	164067768..164085301	17534	3.81725	3.83709	3.77365	3.81827	3.81573	3.84061	3.80933	0.032453	3.82487	0.0136884	CASP9	caspase 9, apoptosis-related cysteine peptidase	Cytoplasm	peptidase	RNAseq_Specific
G10328	Efhd2	5	complement(164119687..164135720)	16034	5.36086	5.328	5.19663	5.44557	5.26686	5.4723	5.29516	0.0869009	5.39491	0.111694	EFHD2	EF-hand domain family, member D2	Other	other	Common_Between_RNAseq_&_Microarray
G10331	KAZN	5	complement(164350465..164739758)	389294	3.08985	3.05464	3.06762	3.35948	3.5044	3.64121	3.07071	0.0178049	3.50169	0.140886	KAZN	kazrin, periplakin interacting protein	Plasma Membrane	other	Common_Between_RNAseq_&_Microarray
G10333	Prdm2	5	complement(165469844..165578324)	108481	3.15771	3.29256	3.16817	3.23016	3.20614	3.14145	3.20615	0.0750211	3.19258	0.0458816	PRDM2	PR domain containing 2, with ZNF domain	Nucleus	transcription regulator	Common_Between_RNAseq_&_Microarray
G10334	RGD1562259	5	165588420..165588924	505	3.4961	3.61669	3.38318	4.27257	4.48427	3.7873	3.49865	0.116776	4.18138	0.35732	RGD1562259	similar to 40S ribosomal protein S20	Other	other	RNAseq_Specific
G10336	Pdpn	5	complement(165646114..165679595)	33482	3.46649	3.655	3.33821	3.62024	3.71004	3.66582	3.48656	0.159345	3.66537	0.0449019	PDPN	podoplanin	Plasma Membrane	transporter	Common_Between_RNAseq_&_Microarray
G1034	Clip3	1	89906480..89921238	14759	7.19318	7.19546	7.09336	7.77848	7.48686	7.67628	7.16067	0.0583024	7.6472	0.147965	CLIP3	CAP-GLY domain containing linker protein 3	Cytoplasm	other	RNAseq_Specific
G1035	Alkbh6	1	89922890..89928260	5371	3.85116	3.69625	3.83504	3.32965	3.44612	3.4448	3.79415	0.0851665	3.40685	0.0668665	ALKBH6	alkB, alkylation repair homolog 6 (E. coli)	Other	other	Common_Between_RNAseq_&_Microarray
G10354	Dhrs3	5	166490225..166524733	34509	3.08816	3.01774	3	3	3	3	3.0353	0.0466276	3	0	DHRS3	dehydrogenase/reductase (SDR family) member 3	Cytoplasm	enzyme	Common_Between_RNAseq_&_Microarray
G10355	Vps13d	5	complement(166572596..166798221)	225626	3.16253	3.25532	3.16817	3.11172	3.08219	3.01774	3.19534	0.0520224	3.07055	0.0480594	VPS13D	vacuolar protein sorting 13 homolog D (S. cerevisiae)	Other	other	Common_Between_RNAseq_&_Microarray
G10363	ENSRNOG00000037014	5	complement(168163179..168169217)	6039	3.54071	3.65329	3.70729	3.40857	3.28889	3.19598	3.63376	0.0849887	3.29781	0.106575
G10364	Miip	5	complement(168215527..168220810)	5284	3.05028	3.09409	3.26135	3	3	3	3.13524	0.111391	3	0	MIIP	migration and invasion inhibitory protein	Other	other	RNAseq_Specific
G10365	Mfn2	5	complement(168227300..168252497)	25198	5.43793	5.4497	5.47635	5.67497	5.64515	5.65764	5.45466	0.019685	5.65925	0.0149728	MFN2	mitofusin 2	Cytoplasm	enzyme	Common_Between_RNAseq_&_Microarray
G10367	Mfn2	5	complement(168342974..168372608)	29635	4.79059	4.84397	4.1117	4.79033	4.42877	4.65191	4.58209	0.408237	4.62367	0.18243	MFN2	mitofusin 2	Cytoplasm	enzyme	Common_Between_RNAseq_&_Microarray
G10368	Plod1	5	complement(168379097..168405535)	26439	4.44143	4.44209	4.50819	4.65162	4.66591	4.93563	4.46391	0.0383568	4.75105	0.160007	PLOD1	procollagen-lysine, 2-oxoglutarate 5-dioxygenase 1	Cytoplasm	enzyme	Common_Between_RNAseq_&_Microarray
G10369	RGD1305350	5	168409903..168416143	6241	4.47686	4.40171	4.35656	4.50567	4.45429	4.60553	4.41171	0.0607718	4.52183	0.0769045	KIAA2013	KIAA2013	Other	other	Common_Between_RNAseq_&_Microarray
G10372	Clcn6	5	complement(168471564..168502323)	30760	5.03677	5.03168	4.79553	5.30844	5.11118	5.20975	4.95466	0.137834	5.20979	0.0986338	CLCN6	chloride channel, voltage-sensitive 6	Plasma Membrane	ion channel	RNAseq_Specific
G10373	Mthfr	5	168504579..168518702	14124	3.17855	3.01595	3.16575	3.2317	3	3.09832	3.12009	0.090408	3.11001	0.116289	MTHFR	methylenetetrahydrofolate reductase (NAD(P)H)	Cytoplasm	enzyme	RNAseq_Specific
G10375	Draxin	5	complement(168572013..168585976)	13964	5.91229	5.75047	5.54813	5.47635	5.57803	5.43309	5.73696	0.182457	5.49582	0.0744084	DRAXIN	dorsal inhibitory axon guidance protein	Extracellular Space	other	RNAseq_Specific
G10377	Mad2l2	5	168609827..168614293	4467	3.96173	3.93695	4.09489	3.46649	3.64005	3.71554	3.99786	0.0849409	3.60736	0.127706	Mad2l2	MAD2 mitotic arrest deficient-like 2 (yeast)	Nucleus	other	RNAseq_Specific
G10378	Fbxo6	5	complement(168614323..168617886)	3564	4.76445	4.73849	4.91835	4.52738	4.57532	4.72167	4.8071	0.0972148	4.60812	0.101216	FBXO6	F-box protein 6	Cytoplasm	enzyme	Common_Between_RNAseq_&_Microarray
G10379	Fbxo44	5	complement(168620959..168644538)	23580	6.97803	6.84923	6.85011	6.8062	6.7963	6.86815	6.89246	0.0741059	6.82355	0.0389396	FBXO44	F-box protein 44	Other	other	Common_Between_RNAseq_&_Microarray
G10380	Fbxo2	5	168630521..168635950	5430	5.39536	4.95554	5.37205	5.27267	5.38056	5.23372	5.24098	0.247476	5.29565	0.07607	FBXO2	F-box protein 2	Cytoplasm	enzyme	Common_Between_RNAseq_&_Microarray
G10381	Ptchd2	5	complement(168710726..168741342)	30617	3.07623	3	3	3	3	3	3.02541	0.0440112	3	0	PTCHD2	patched domain containing 2	Other	other	RNAseq_Specific
G10384	Mtor	5	168920401..169030568	110168	3.80645	3.75878	3.64754	3.79714	3.68338	3.68395	3.73759	0.081545	3.72149	0.0655144	MTOR	mechanistic target of rapamycin (serine/threonine kinase)	Nucleus	kinase	Common_Between_RNAseq_&_Microarray
G10386	Exosc10	5	169031609..169054708	23100	4.97428	4.94784	4.99998	4.83443	4.90638	4.85893	4.97403	0.0260717	4.86658	0.0365805	Exosc10	exosome component 10	Nucleus	enzyme	RNAseq_Specific
G10387	Srm	5	169061723..169064921	3199	5.50111	5.30003	5.50747	5.41171	5.5821	5.59798	5.4362	0.117974	5.5306	0.103263	SRM	spermidine synthase	Cytoplasm	enzyme	Common_Between_RNAseq_&_Microarray
G10388	Masp2	5	169071761..169086477	14717	3.18486	3.30722	3.4248	3.16493	3.35243	3.12585	3.30563	0.119976	3.2144	0.121122	MASP2	mannan-binding lectin serine peptidase 2	Extracellular Space	peptidase	Common_Between_RNAseq_&_Microarray
G10389	Tardbp	5	complement(169088696..169098491)	9796	7.09041	7.09753	7.21215	7.37052	7.37809	7.25951	7.13336	0.068325	7.33604	0.0663867	Tardbp	TAR DNA binding protein	Nucleus	other	Common_Between_RNAseq_&_Microarray
G1039	Lrfn3	1	complement(89975457..89980935)	5479	3.08476	3.13982	3.00164	3.08732	3.15691	3.27706	3.0754	0.0695608	3.17376	0.0959844	LRFN3	leucine rich repeat and fibronectin type III domain containing 3	Other	other	RNAseq_Specific
G10393	Pex14	5	complement(169433225..169568626)	135402	4.80252	4.74658	4.70244	4.44242	4.45694	4.59036	4.75051	0.0501562	4.49657	0.0815452	PEX14	peroxisomal biogenesis factor 14	Cytoplasm	transcription regulator	Common_Between_RNAseq_&_Microarray
G10394	Dffa	5	169573104..169586002	12899	3	3	3	3.1349	3.14145	3.23708	3	0	3.17114	0.0571947	DFFA	DNA fragmentation factor, 45kDa, alpha polypeptide	Nucleus	enzyme	RNAseq_Specific
G10395	Apitd1	5	complement(169588757..169780881)	192125	6.36089	6.41286	6.29205	6.72288	6.60481	6.59006	6.35526	0.0606035	6.63925	0.0727966	Apitd1	apoptosis-inducing, TAF9-like domain 1	Other	other	RNAseq_Specific
G10396	Ube4b	5	complement(169804688..169890811)	86124	4.59752	4.61176	4.43611	4.96507	4.66846	4.77055	4.54846	0.0975624	4.80136	0.150684	UBE4B	ubiquitination factor E4B	Cytoplasm	enzyme	Common_Between_RNAseq_&_Microarray
G10401	Lzic	5	170076691..170088575	11885	3.41061	3.45272	3.45536	3.15205	3.13735	3.12996	3.43956	0.0251066	3.13979	0.0112462	LZIC	leucine zipper and CTNNBIP1 domain containing	Other	other	RNAseq_Specific
G10402	Ctnnbip1	5	170131839..170159318	27480	3.93128	3.91224	3.92562	3.75719	3.74061	3.69234	3.92305	0.00977893	3.73005	0.0336932	CTNNBIP1	catenin, beta interacting protein 1	Cytoplasm	other	Common_Between_RNAseq_&_Microarray
G10403	Clstn1	5	170179472..170247833	68362	7.13275	7.1673	6.84428	7.0384	6.87318	7.02083	7.04811	0.177365	6.97747	0.090741	CLSTN1	calsyntenin 1	Plasma Membrane	other	Common_Between_RNAseq_&_Microarray
G10405	Tmem201	5	complement(170318703..170339591)	20889	4.58075	4.50725	4.4687	4.26398	4.17417	4.11422	4.5189	0.0569273	4.18412	0.0753756	TMEM201	transmembrane protein 201	Nucleus	other	RNAseq_Specific
G10406	Slc25a33	5	complement(170345879..170371208)	25330	4.75515	4.63837	4.96644	4.89818	4.9713	4.96413	4.78666	0.166287	4.94454	0.0403055	SLC25A33	solute carrier family 25 (pyrimidine nucleotide carrier), member 33	Cytoplasm	other	Common_Between_RNAseq_&_Microarray
G10414	Eno1	5	170916358..170927263	10906	9.05672	8.91285	8.88227	9.08762	8.7674	8.91285	8.95061	0.0931556	8.92262	0.160336	ENO1	enolase 1, (alpha)	Cytoplasm	enzyme	Common_Between_RNAseq_&_Microarray
G10415	Rere	5	170960573..171292512	331940	4.87894	4.82936	4.73389	4.4311	4.37722	4.36429	4.81406	0.0737287	4.39087	0.035438	RERE	arginine-glutamic acid dipeptide (RE) repeats	Nucleus	other	Common_Between_RNAseq_&_Microarray
G10417	Slc45a1	5	complement(171300141..171322391)	22251	5.38849	5.41426	5.20293	6.14149	5.99876	6.41548	5.33523	0.115294	6.18524	0.21178	SLC45A1	solute carrier family 45, member 1	Other	transporter	Common_Between_RNAseq_&_Microarray
G10418	ERRFI1	5	171529356..171541439	12084	4.29811	4.02426	4.03353	3.95335	3.88228	3.91751	4.11863	0.155497	3.91772	0.0355356	ERRFI1	ERBB receptor feedback inhibitor 1	Cytoplasm	other	Common_Between_RNAseq_&_Microarray
G10419	RGD1560648	5	complement(171566144..171582474)	16331	7.83594	7.71798	7.89787	7.57689	7.74824	7.74597	7.81726	0.0913847	7.69037	0.0982815	RGD1560648	parkinson protein 7 pseudogene	Other	other	RNAseq_Specific
G10422	Per3	5	complement(171665221..171700125)	34905	3.62609	3.51829	3.66127	3	3	3	3.60189	0.0744992	3	0	PER3	period circadian clock 3	Nucleus	other	Common_Between_RNAseq_&_Microarray
G10423	Vamp3	5	complement(171703254..171713723)	10470	6.47321	6.47321	6.5716	6.45942	6.55405	6.51728	6.50601	0.056804	6.51025	0.0477043	VAMP3	vesicle-associated membrane protein 3	Plasma Membrane	other	Common_Between_RNAseq_&_Microarray
G10424	Camta1	5	complement(171715302..171964129)	248828	4.55644	4.65962	4.5063	4.38828	4.35269	4.24889	4.57412	0.0781725	4.32995	0.0724203	CAMTA1	calmodulin binding transcription activator 1	Other	other	Common_Between_RNAseq_&_Microarray
G10429	Dnajc11	5	172668492..172712646	44155	4.94387	4.73929	4.74631	4.73497	4.6582	4.77161	4.80982	0.116141	4.72159	0.0578797	DNAJC11	DnaJ (Hsp40) homolog, subfamily C, member 11	Cytoplasm	other	Common_Between_RNAseq_&_Microarray
G10430	Thap3	5	complement(172713824..172719572)	5749	4.0176	3.83911	4.01312	3.86017	3.90936	3.8954	3.95661	0.101787	3.88831	0.0253502	THAP3	THAP domain containing, apoptosis associated protein 3	Other	other	Common_Between_RNAseq_&_Microarray
G10431	Phf13	5	complement(172719997..172726441)	6445	3.34033	3.44016	3.388	3.12831	3.19675	3.23554	3.3895	0.0499292	3.18687	0.0542956	PHF13	PHD finger protein 13	Nucleus	other	Common_Between_RNAseq_&_Microarray
G10432	Klhl21	5	172740028..172748683	8656	3.5948	3.57499	3.29037	3.67998	3.6114	3.73465	3.48672	0.170335	3.67534	0.061757	KLHL21	kelch-like family member 21	Cytoplasm	enzyme	Common_Between_RNAseq_&_Microarray
G10433	Zbtb48	5	complement(172750035..172758372)	8338	3	3	3.00971	3	3	3	3.00324	0.00560656	3	0	ZBTB48	zinc finger and BTB domain containing 48	Nucleus	transcription regulator	RNAseq_Specific
G10435	Nol9	5	172771378..172789897	18520	3.61964	3.56831	3.69679	3.76091	3.83099	3.8008	3.62825	0.0646745	3.79757	0.0351549	NOL9	nucleolar protein 9	Nucleus	other	Common_Between_RNAseq_&_Microarray
G10440	Acot7	5	172912096..173003553	91458	7.53942	7.56612	7.56188	7.54292	7.53361	7.56188	7.55581	0.0143459	7.54614	0.014405	ACOT7	acyl-CoA thioesterase 7	Cytoplasm	enzyme	Common_Between_RNAseq_&_Microarray
G10441	Gpr153	5	173005832..173016052	10221	3.05723	3	3	3.00164	3	3.00521	3.01908	0.0330426	3.00228	0.00266437	GPR153	G protein-coupled receptor 153	Plasma Membrane	G-protein coupled receptor	RNAseq_Specific
G10443	Icmt	5	173028513..173035369	6857	3	3.0088	3	3	3	3	3.00293	0.00508105	3	0	ICMT	isoprenylcysteine carboxyl methyltransferase	Cytoplasm	enzyme	RNAseq_Specific
G10445	Rpl22	5	173055215..173066404	11190	6.68776	6.68523	7.15744	6.5008	6.74578	6.56605	6.84348	0.271905	6.60421	0.126868	RPL22	ribosomal protein L22	Nucleus	other	Common_Between_RNAseq_&_Microarray
G10446	Chd5	5	173072897..173119043	46147	4.4497	4.52614	4.13285	4.1964	3.81777	3.80695	4.36956	0.208533	3.94038	0.221789	CHD5	chromodomain helicase DNA binding protein 5	Nucleus	enzyme	RNAseq_Specific
G10448	Kcnab2	5	complement(173126375..173212638)	86264	5.30148	5.32693	5.06313	5.38436	5.199	5.20917	5.23051	0.145515	5.26418	0.104203	KCNAB2	potassium voltage-gated channel, shaker-related subfamily, beta member 2	Plasma Membrane	ion channel	RNAseq_Specific
G10450	Nphp4	5	173212951..173298420	85470	3.10837	3.05984	3.3672	3.11338	3	3.12006	3.17847	0.165233	3.07781	0.0674719	NPHP4	nephronophthisis 4	Cytoplasm	other	RNAseq_Specific
G10452	Ajap1	5	complement(174137054..174194344)	57291	3.81827	3.90024	3.68395	4.4126	4.36429	4.62148	3.80082	0.109196	4.46612	0.136698	Ajap1	adherens junction associated protein 1	Other	other	RNAseq_Specific
G10454	RGD1304567	5	174734521..174738965	4445	4.33171	4.43277	4.4749	4.3692	4.56709	4.4401	4.41312	0.0735881	4.4588	0.100263	C1orf174	chromosome 1 open reading frame 174	Other	other	Common_Between_RNAseq_&_Microarray
G10456	Cep104	5	174757446..174786094	28649	4.1279	4.10751	3.94964	4.2666	4.10165	4.12085	4.06169	0.0975669	4.16304	0.0902014	CEP104	centrosomal protein 104kDa	Cytoplasm	other	Common_Between_RNAseq_&_Microarray
G10457	Lrrc47	5	174789385..174799217	9833	4.58287	4.48042	4.44838	4.33743	4.38174	4.2737	4.50389	0.0702497	4.33095	0.0543094	LRRC47	leucine rich repeat containing 47	Other	other	Common_Between_RNAseq_&_Microarray
G1046	APLP1	1	complement(90053391..90063141)	9751	9.30082	9.25645	9.10329	8.89012	8.84692	8.74765	9.22019	0.103637	8.82823	0.0730533	APLP1	amyloid beta (A4) precursor-like protein 1	Extracellular Space	other	Common_Between_RNAseq_&_Microarray
G10461	Wrap73	5	174926481..174935895	9415	4.17017	4.19482	4.09785	4.36077	4.32168	4.58887	4.15428	0.0504041	4.42377	0.144306	WRAP73	WD repeat containing, antisense to TP73	Nucleus	other	Common_Between_RNAseq_&_Microarray
G10462	TPRG1L	5	complement(174938793..174941982)	3190	7.0033	6.97803	6.83439	6.63575	6.77729	6.73003	6.93857	0.0911029	6.71436	0.0720579	TPRG1L	tumor protein p63 regulated 1-like	Cytoplasm	other	Common_Between_RNAseq_&_Microarray
G10471	Fam213b	5	complement(175760762..175763365)	2604	4.66591	4.44407	4.69549	4.34843	4.59634	4.44076	4.60182	0.137416	4.46184	0.12529	FAM213B	family with sequence similarity 213, member B	Cytoplasm	enzyme	Common_Between_RNAseq_&_Microarray
G10473	Hes5	5	175820392..175821159	768	4.31844	4.85671	4.96575	4.18295	4.196	4.09277	4.71363	0.346565	4.15724	0.0562138	HES5	hes family bHLH transcription factor 5	Nucleus	other	RNAseq_Specific
G10474	Pank4	5	175823559..175840289	16731	4.87453	4.86438	4.74524	4.78902	4.81127	4.69993	4.82805	0.0718962	4.76674	0.0589187	PANK4	pantothenate kinase 4	Cytoplasm	kinase	Common_Between_RNAseq_&_Microarray
G10477	Pex10	5	175925857..175931023	5167	3.9865	3.8152	3.70619	3	3.18408	3.06245	3.83596	0.141307	3.08218	0.093614	PEX10	peroxisomal biogenesis factor 10	Cytoplasm	other	RNAseq_Specific
G10478	Rer1	5	complement(175932626..175944701)	12076	5.66718	5.67412	5.76884	5.94439	6.11562	6.07563	5.70338	0.0567953	6.04521	0.0895747	RER1	retention in endoplasmic reticulum sorting receptor 1	Cytoplasm	other	Common_Between_RNAseq_&_Microarray
G10479	Morn1	5	175945054..176002862	57809	5.18441	5.05227	5.20116	4.89163	4.88189	4.58709	5.14595	0.0815581	4.78687	0.173085	MORN1	MORN repeat containing 1	Other	other	RNAseq_Specific
G10480	Ski	5	complement(176018126..176083961)	65836	3.871	3.96126	3.59599	3.60727	3.34463	3.42414	3.80942	0.19026	3.45868	0.134687	Ski	v-ski avian sarcoma viral oncogene homolog	Nucleus	transcription regulator	Common_Between_RNAseq_&_Microarray
G10481	RGD1308923	5	176107841..176114290	6450	3.75132	3.58823	3.76464	3.5438	3.67828	3.74116	3.7014	0.0982329	3.65441	0.100824	C1orf86	chromosome 1 open reading frame 86	Nucleus	other	RNAseq_Specific
G10482	Prkcz	5	complement(176118465..176228206)	109742	5.03721	4.85075	4.72684	4.85174	4.73876	4.82327	4.8716	0.156234	4.80459	0.0587593	PRKCZ	protein kinase C, zeta	Cytoplasm	kinase	Common_Between_RNAseq_&_Microarray
G10487	Gnb1	5	176410631..176455109	44479	7.97947	8.05804	7.80649	8.06846	7.98354	7.90833	7.948	0.128693	7.98678	0.0801143	GNB1	guanine nucleotide binding protein (G protein), beta polypeptide 1	Plasma Membrane	enzyme	Common_Between_RNAseq_&_Microarray
G10488	Nadk	5	176461415..176490616	29202	4.27219	4.32168	4.29884	4.1117	4.11463	4.06799	4.29757	0.0247687	4.09811	0.0261248	NADK	NAD kinase	Cytoplasm	kinase	Common_Between_RNAseq_&_Microarray
G10490	ENSRNOG00000046253	5	176528187..176542116	13930	4.79605	4.79502	4.72574	5.29379	5.06313	5.14577	4.77227	0.0402985	5.16757	0.116867
G10491	Cdk11b	5	176542671..176553642	10972	5.37396	5.27936	5.40083	5.49136	5.55551	5.519	5.35138	0.0638047	5.52196	0.0321743	Cdk11b	cyclin-dependent kinase 11B	Cytoplasm	enzyme	Common_Between_RNAseq_&_Microarray
G10493	Mib2	5	complement(176558731..176565084)	6354	5.49233	5.44026	5.38038	5.31935	5.12404	5.21247	5.43766	0.0560166	5.21862	0.0977989	MIB2	mindbomb E3 ubiquitin protein ligase 2	Nucleus	transcription regulator	Common_Between_RNAseq_&_Microarray
G10496	Ssu72	5	176628574..176658329	29756	6.9774	6.92662	7.08711	6.84923	7.05088	6.93213	6.99704	0.0820318	6.94408	0.101353	SSU72	SSU72 RNA polymerase II CTD phosphatase homolog (S. cerevisiae)	Other	phosphatase	Common_Between_RNAseq_&_Microarray
G10497	Tmem240	5	176659600..176664534	4935	3.35243	3.4704	3.40652	3	3	3	3.40978	0.059051	3	0	TMEM240	transmembrane protein 240	Other	other	Common_Between_RNAseq_&_Microarray
G10498	Atad3a	5	complement(176665202..176685381)	20180	4.70465	4.64732	4.78377	4.71978	4.90276	4.89673	4.71191	0.0685143	4.83976	0.103946	ATAD3A/ATAD3B	ATPase family, AAA domain containing 3A	Nucleus	other	RNAseq_Specific
G10499	Vwa1	5	complement(176692353..176697535)	5183	4.70631	4.99635	4.64676	5.12218	4.87944	4.97794	4.78314	0.187031	4.99319	0.122089	VWA1	von Willebrand factor A domain containing 1	Extracellular Space	other	Common_Between_RNAseq_&_Microarray
G1050	Arhgap33	1	complement(90133412..90145522)	12111	3.49675	3.42211	3.30284	3.2294	3.18408	3.22476	3.40723	0.0978081	3.21275	0.024932	ARHGAP33	Rho GTPase activating protein 33	Plasma Membrane	transporter	Common_Between_RNAseq_&_Microarray
G10502	Mrpl20	5	176723859..176728389	4531	5.83719	5.88252	5.92267	5.61794	5.9046	5.91217	5.88079	0.04277	5.81157	0.16773	MRPL20	mitochondrial ribosomal protein L20	Cytoplasm	other	Common_Between_RNAseq_&_Microarray
G10503	CCNL2	5	176732433..176743690	11258	6.62971	6.6527	6.73023	6.22188	6.10507	5.81737	6.67088	0.0526695	6.0481	0.208184	CCNL2	cyclin L2	Nucleus	other	Common_Between_RNAseq_&_Microarray
G10504	Aurkaip1	5	176750389..176751784	1396	5.40083	5.22602	5.57456	5.24022	5.48058	5.43793	5.40047	0.174268	5.38624	0.128243	AURKAIP1	aurora kinase A interacting protein 1	Nucleus	enzyme	Common_Between_RNAseq_&_Microarray
G10506	Dvl1	5	176771886..176783561	11676	5.34387	5.16644	5.29453	5.08652	5.16018	5.25221	5.26828	0.0915841	5.1663	0.0830104	DVL1	dishevelled segment polarity protein 1	Cytoplasm	other	Common_Between_RNAseq_&_Microarray
G10508	Gltpd1	5	complement(176789844..176793929)	4086	4.81513	4.74226	4.79786	5.10154	5.32061	5.27527	4.78509	0.0380774	5.23248	0.115636	GLTPD1	glycolipid transfer protein domain containing 1	Other	transporter	Common_Between_RNAseq_&_Microarray
G10509	Cpsf3l	5	176794095..176812548	18454	5.46888	5.31517	5.45086	5.21809	5.5694	5.56163	5.41164	0.0840246	5.44971	0.200623	CPSF3L	cleavage and polyadenylation specific factor 3-like	Nucleus	other	RNAseq_Specific
G10510	Pusl1	5	complement(176811652..176815508)	3857	3	3	3	3.17059	3	3	3	0	3.05686	0.0984886	PUSL1	pseudouridylate synthase-like 1	Other	enzyme	RNAseq_Specific
G10511	Acap3	5	176815678..176830373	14696	4.43244	4.3727	4.54324	4.52269	4.32168	4.48459	4.44946	0.0865355	4.44299	0.106768	Acap3	ArfGAP with coiled-coil, ankyrin repeat and PH domains 3	Other	other	Common_Between_RNAseq_&_Microarray
G10512	Ube2j2	5	176848287..176862700	14414	5.47002	5.61545	5.72887	5.75208	5.8107	5.79051	5.60478	0.129754	5.78443	0.029778	UBE2J2	ubiquitin-conjugating enzyme E2, J2	Cytoplasm	enzyme	Common_Between_RNAseq_&_Microarray
G10515	Sdf4	5	176901518..176918493	16976	6.86517	6.97115	6.74329	7.01717	6.91619	6.83559	6.85987	0.114027	6.92299	0.0909793	SDF4	stromal cell derived factor 4	Cytoplasm	other	Common_Between_RNAseq_&_Microarray
G1052	Hspb6	1	90162903..90165073	2171	3.55854	3.39008	3.64062	3.00075	3.11505	3.16977	3.52975	0.127729	3.09519	0.0862429	HSPB6	heat shock protein, alpha-crystallin-related, B6	Cytoplasm	other	Common_Between_RNAseq_&_Microarray
G10522	RGD1311517	5	177016247..177033648	17402	3.19833	3.04157	3.20458	3.18645	3.224	3.07965	3.14816	0.0923575	3.16336	0.0748924	C1orf159	chromosome 1 open reading frame 159	Other	other	RNAseq_Specific
G10524	Agrn	5	complement(177063801..177085091)	21291	5.65992	5.57031	5.68888	5.14536	5.05685	5.10573	5.6397	0.0618152	5.10265	0.044339	AGRN	agrin	Plasma Membrane	other	Common_Between_RNAseq_&_Microarray
G10525	Isg15	5	complement(177098680..177099967)	1288	3.91079	3.3672	3.8646	3.54937	3.51891	3.60903	3.7142	0.301395	3.5591	0.045844	ISG15	ISG15 ubiquitin-like modifier	Extracellular Space	other	Common_Between_RNAseq_&_Microarray
G10528	Klhl17	5	complement(177128900..177133715)	4816	4.27928	4.17695	4.26996	4.00773	3.85216	3.86707	4.24206	0.0565826	3.90898	0.0858418	KLHL17	kelch-like family member 17	Cytoplasm	other	RNAseq_Specific
G10529	Noc2l	5	177134961..177146499	11539	5.27639	5.15957	5.41864	5.07091	5.12507	5.04857	5.28487	0.129746	5.08152	0.0393413	NOC2L	nucleolar complex associated 2 homolog (S. cerevisiae)	Nucleus	transcription regulator	Common_Between_RNAseq_&_Microarray
G1053	Lin37	1	complement(90165072..90169004)	3933	4.196	4.19404	4.31157	4.06452	4.46608	4.35444	4.23387	0.0672979	4.29502	0.20727	LIN37	lin-37 homolog (C. elegans)	Nucleus	other	Common_Between_RNAseq_&_Microarray
G10533	FEZ2	6	complement(956475..995426)	38952	4.03971	4.15367	3.85818	3.80904	3.56039	3.6366	4.01719	0.149029	3.66868	0.12739	FEZ2	fasciculation and elongation protein zeta 2 (zygin II)	Cytoplasm	other	Common_Between_RNAseq_&_Microarray
G10535	Strn	6	complement(1228267..1309977)	81711	3	3.01147	3	3	3	3	3.00382	0.00662359	3	0	STRN	striatin, calmodulin binding protein	Cytoplasm	other	Common_Between_RNAseq_&_Microarray
G10536	Heatr5b	6	complement(1321469..1401571)	80103	3.83354	3.87886	3.76091	3.49034	3.51703	3.3203	3.82444	0.0595022	3.44256	0.106717	HEATR5B	HEAT repeat containing 5B	Other	other	Common_Between_RNAseq_&_Microarray
G10537	Gpatch11	6	1401794..1411973	10180	4.00324	4.00773	3.94451	4.34737	4.3335	4.24091	3.98516	0.0352774	4.30726	0.0578812	GPATCH11	G patch domain containing 11	Other	other	Common_Between_RNAseq_&_Microarray
G10538	Eif2ak2	6	complement(1420771..1444923)	24153	3.30576	3.28446	3.01147	3.57438	3.28001	3.32245	3.20056	0.164102	3.39228	0.159123	EIF2AK2	eukaryotic translation initiation factor 2-alpha kinase 2	Cytoplasm	kinase	RNAseq_Specific
G1054	Psenen	1	complement(90170911..90172105)	1195	6.26716	6.07969	6.3146	5.8976	5.93664	6.1815	6.22049	0.124217	6.00525	0.153882	PSENEN	presenilin enhancer gamma secretase subunit	Cytoplasm	peptidase	Common_Between_RNAseq_&_Microarray
G10541	1110001A16RIK	6	1506267..1507727	1461	4.20776	4.31735	4.62791	4.11755	4.28778	4.07871	4.38434	0.217937	4.16134	0.111203
G10542	Cebpz	6	complement(1506913..1524597)	17685	4.04628	4.02558	4.04103	4.21476	4.15974	4.15651	4.03763	0.0107608	4.177	0.0327382	CEBPZ	CCAAT/enhancer binding protein (C/EBP), zeta	Nucleus	other	Common_Between_RNAseq_&_Microarray
G10543	Ndufaf7	6	1524703..1535937	11235	4.55827	4.523	4.55644	4.60673	4.61117	4.48845	4.5459	0.0198549	4.56878	0.0696082	NDUFAF7	NADH dehydrogenase (ubiquinone) complex I, assembly factor 7	Cytoplasm	other	Common_Between_RNAseq_&_Microarray
G10546	RGD1562284	6	1647589..1679763	32175	4.44904	4.60673	4.81102	4.51197	4.50281	4.57013	4.62226	0.181487	4.5283	0.0365109	QPCT	glutaminyl-peptide cyclotransferase	Cytoplasm	enzyme	Common_Between_RNAseq_&_Microarray
G1055	U2af1l4	1	90171104..90174276	3173	4.94854	4.93751	4.99907	4.68068	4.95275	4.90784	4.96171	0.0328265	4.84709	0.14585	U2AF1L4	U2 small nuclear RNA auxiliary factor 1-like 4	Nucleus	other	Common_Between_RNAseq_&_Microarray
G10552	Atl2	6	2548708..2590119	41412	5.02527	5.03743	5.12218	5.03102	5.08865	5.09902	5.06163	0.0527914	5.0729	0.0366348	ATL2	atlastin GTPase 2	Cytoplasm	other	Common_Between_RNAseq_&_Microarray
G10553	Hnrnpll	6	complement(2678572..2708005)	29434	4.65705	4.67616	4.70161	5.06335	4.92403	4.96644	4.67827	0.0223512	4.98461	0.0714125	HNRNPLL	heterogeneous nuclear ribonucleoprotein L-like	Other	other	Common_Between_RNAseq_&_Microarray
G10555	Srsf7	6	complement(2857412..2863365)	5954	7.09336	7.0578	7.06273	6.54558	6.57705	6.46147	7.0713	0.0192669	6.52803	0.0597535	Srsf7	serine/arginine-rich splicing factor 7	Nucleus	other	RNAseq_Specific
G10558	Dhx57	6	complement(2898233..2941135)	42903	4.75568	4.76684	4.98526	4.82936	4.88335	4.82148	4.83593	0.129446	4.84473	0.0336768	DHX57	DEAH (Asp-Glu-Ala-Asp/His) box polypeptide 57	Extracellular Space	other	Common_Between_RNAseq_&_Microarray
G10561	Sos1	6	complement(3082456..3159445)	76990	3.78314	3.71391	3.54997	3.7161	3.69902	3.61964	3.68234	0.119746	3.67825	0.0514753	SOS1	son of sevenless homolog 1 (Drosophila)	Cytoplasm	other	Common_Between_RNAseq_&_Microarray
G10562	Cdkl4	6	complement(3203271..3223505)	20235	3.30576	3.2363	3.16332	3	3.15367	3	3.23513	0.0712246	3.05122	0.0887238	CDKL4	cyclin-dependent kinase-like 4	Nucleus	kinase	RNAseq_Specific
G10563	Map4k3	6	complement(3247187..3414716)	167530	4.57318	4.6888	4.68406	4.6091	4.73443	4.60318	4.64868	0.0654296	4.6489	0.074126	MAP4K3	mitogen-activated protein kinase kinase kinase kinase 3	Other	kinase	Common_Between_RNAseq_&_Microarray
G10565	Tmem178a	6	3625175..3683554	58380	6.18289	6.01122	5.90038	6.13278	6.06264	6.41894	6.0315	0.142342	6.20479	0.188753	TMEM178A	transmembrane protein 178A	Other	other	Common_Between_RNAseq_&_Microarray
G10566	Thumpd2	6	complement(3710781..3762198)	51418	4.23327	3.90071	4.19206	3.82288	3.82494	3.58401	4.10868	0.18128	3.74394	0.138512	THUMPD2	THUMP domain containing 2	Other	enzyme	RNAseq_Specific
G10567	Slc8a1	6	complement(4220847..4481722)	260876	3	3	3	3.15529	3	3.08389	3	0	3.07973	0.077731	SLC8A1	solute carrier family 8 (sodium/calcium exchanger), member 1	Plasma Membrane	transporter	Common_Between_RNAseq_&_Microarray
G10572	Eml4	6	6573579..6629032	55454	4.03971	4.0537	4.28704	3.90024	4.03002	3.98058	4.12681	0.138935	3.97028	0.0655021	EML4	echinoderm microtubule associated protein like 4	Cytoplasm	other	Common_Between_RNAseq_&_Microarray
G10573	Cox7a2l	6	complement(6650357..6664094)	13738	7.53175	7.5525	7.72203	7.76717	7.8722	7.90431	7.60209	0.104386	7.84789	0.0717287	COX7A2L	cytochrome c oxidase subunit VIIa polypeptide 2 like	Cytoplasm	enzyme	Common_Between_RNAseq_&_Microarray
G10575	Mta3	6	6899431..6981336	81906	4.32312	4.4126	4.30939	4.44805	4.38794	4.35621	4.34837	0.0560454	4.3974	0.046646	MTA3	metastasis associated 1 family, member 3	Nucleus	other	RNAseq_Specific
G10578	Zfp36l2	6	complement(7357987..7362018)	4032	3.25911	3.4375	3.54071	3.24927	3.32819	3.44149	3.41244	0.142465	3.33965	0.096622	ZFP36L2	ZFP36 ring finger protein-like 2	Nucleus	transcription regulator	Common_Between_RNAseq_&_Microarray
G10581	Dync2li1	6	7837943..7869291	31349	4.61266	4.58287	4.73849	4.22712	4.25153	4.17695	4.64468	0.0826036	4.21853	0.0380244	Dync2li1	dynein cytoplasmic 2 light intermediate chain 1	Other	other	Common_Between_RNAseq_&_Microarray
G10584	Lrpprc	6	complement(7919929..8001949)	82021	5.50811	5.58811	5.50111	5.5601	5.46953	5.42756	5.53244	0.0483386	5.48573	0.0677412	LRPPRC	leucine-rich pentatricopeptide repeat containing	Cytoplasm	other	Common_Between_RNAseq_&_Microarray
G10585	Ppm1b	6	8152847..8212461	59615	6.76088	6.83136	6.97006	7.06273	7.02139	6.93006	6.8541	0.106425	7.00472	0.0678882	PPM1B	protein phosphatase, Mg2+/Mn2+ dependent, 1B	Cytoplasm	phosphatase	Common_Between_RNAseq_&_Microarray
G10586	Slc3a1	6	8217523..8251124	33602	7.91942	7.98563	8.08534	7.77715	7.76863	7.73929	7.9968	0.0835183	7.76169	0.0198628	SLC3A1	solute carrier family 3 (amino acid transporter heavy chain), member 1	Plasma Membrane	transporter	Common_Between_RNAseq_&_Microarray
G10587	Prepl	6	complement(8251542..8278693)	27152	7.44438	7.60941	7.15259	7.32915	7.03511	7.02693	7.40213	0.231321	7.1304	0.172173	PREPL	prolyl endopeptidase-like	Other	peptidase	Common_Between_RNAseq_&_Microarray
G10588	Camkmt	6	8279200..8656790	377591	4.22981	4.43044	4.58588	4.48427	4.53173	4.51858	4.41537	0.178512	4.51152	0.0245025	CAMKMT	calmodulin-lysine N-methyltransferase	Other	other	RNAseq_Specific
G10592	Srbd1	6	complement(9187408..9376698)	189291	3.2077	3.0659	3.24546	3.08646	3.18567	3.09409	3.17302	0.094668	3.12207	0.0552084	SRBD1	S1 RNA binding domain 1	Other	other	RNAseq_Specific
G10593	Prkce	6	9404742..9883579	478838	3.21546	3.15933	3	3.30137	3.03015	3.00433	3.12493	0.111775	3.11195	0.164552	PRKCE	protein kinase C, epsilon	Cytoplasm	kinase	Common_Between_RNAseq_&_Microarray
G10595	Eif3h	6	20146737..20231688	84952	7.43181	7.32915	7.42096	7.00503	7.1613	7.11428	7.39397	0.0564003	7.09354	0.0801721	EIF3H	eukaryotic translation initiation factor 3, subunit H	Cytoplasm	translation regulator	Common_Between_RNAseq_&_Microarray
G10596	Epas1	6	20299621..20377837	78217	5.42134	5.34477	4.88894	5.5812	5.09986	5.47327	5.21835	0.287834	5.38478	0.252577	EPAS1	endothelial PAS domain protein 1	Nucleus	transcription regulator	Common_Between_RNAseq_&_Microarray
G106	Ptprk	1	complement(18602550..18714240)	111691	3	3	3	3.28224	3.25153	3.20926	3	0	3.24768	0.0366425	PTPRK	protein tyrosine phosphatase, receptor type, K	Plasma Membrane	phosphatase	RNAseq_Specific
G10601	Rhoq	6	20521668..20557098	35431	3.70508	3.99198	3.84664	4.69384	4.75968	4.84021	3.8479	0.143452	4.76458	0.0733057	RHOQ	ras homolog family member Q	Plasma Membrane	enzyme	Common_Between_RNAseq_&_Microarray
G10602	Pigf	6	complement(20554557..20580952)	26396	6.7486	6.8498	6.95897	7.3393	7.43302	7.3967	6.85245	0.105212	7.38967	0.0472556	PIGF	phosphatidylinositol glycan anchor biosynthesis, class F	Cytoplasm	enzyme	RNAseq_Specific
G10603	Cript	6	20582635..20590644	8010	4.91429	4.99296	5.10846	4.76392	4.81308	4.7663	5.00523	0.0976655	4.7811	0.0277211	CRIPT	cysteine-rich PDZ-binding protein	Cytoplasm	other	Common_Between_RNAseq_&_Microarray
G10605	Socs5	6	20665943..20696549	30607	3.33465	3.71114	3.69791	3.94121	3.93695	4.1312	3.58123	0.21365	4.00312	0.110942	SOCS5	suppressor of cytokine signaling 5	Extracellular Space	cytokine	Common_Between_RNAseq_&_Microarray
G10606	Mcfd2	6	complement(20877155..20887267)	10113	6.27863	6.51515	6.1918	6.08576	5.77254	5.87762	6.32853	0.167348	5.91197	0.159412	MCFD2	multiple coagulation factor deficiency 2	Cytoplasm	other	Common_Between_RNAseq_&_Microarray
G1061	Cox6b1	1	complement(90230830..90238903)	8074	7.1754	7.08759	7.09394	7.0578	7.06753	7.178	7.11898	0.0489638	7.10111	0.066767
G10610	Msh2	6	complement(21198374..21256854)	58481	3.28001	3.4717	3.37693	3	3	3.04942	3.37621	0.0958476	3.01647	0.0285353	MSH2	mutS homolog 2	Nucleus	enzyme	Common_Between_RNAseq_&_Microarray
G10614	Msh6	6	21616774..21634251	17478	3	3.03541	3	3	3	3	3.0118	0.0204461	3	0
G10615	Fbxo11	6	complement(21634307..21658631)	24325	5.15209	5.27639	5.25031	5.17084	5.18599	5.08545	5.22626	0.0655456	5.14743	0.054201	FBXO11	F-box protein 11	Cytoplasm	enzyme	Common_Between_RNAseq_&_Microarray
G10620	Ppp1r21	6	22219236..22281276	62041	4.39724	4.3727	4.30432	4.31807	4.2666	4.2778	4.35809	0.048153	4.28749	0.027068	Ppp1r21	protein phosphatase 1, regulatory subunit 21	Other	other	Common_Between_RNAseq_&_Microarray
G10627	ENSRNOG00000050220	6	complement(23843134..24308904)	465771	4.25871	4.36147	3.95151	4.46772	4.097	3.97876	4.19056	0.213307	4.18116	0.255114
G1063	Rbm42	1	complement(90254914..90264844)	9931	4.86067	4.67899	4.87502	4.9035	4.86363	4.90998	4.80489	0.109271	4.89237	0.0250989	RBM42	RNA binding motif protein 42	Other	other	Common_Between_RNAseq_&_Microarray
G10631	Nrxn1	6	complement(24408199..24715174)	306976	3.97554	4.05109	3.65214	4.19797	3.82847	3.68844	3.89292	0.211916	3.90496	0.26324	NRXN1	neurexin 1	Plasma Membrane	transporter	Common_Between_RNAseq_&_Microarray
G10640	Mtm1	6	28722724..28736837	14114	4.52269	4.61355	4.48042	4.17695	4.06971	4.11546	4.53889	0.0680307	4.1207	0.0538128	MTM1	myotubularin 1	Cytoplasm	phosphatase	RNAseq_Specific
G10641	Alkbh8	6	28777894..28847493	69600	4.06971	4.02871	4.05456	4.08212	4.04981	4.06496	4.05099	0.0207315	4.06563	0.0161678	ALKBH8	alkB, alkylation repair homolog 8 (E. coli)	Cytoplasm	enzyme	RNAseq_Specific
G10643	Fam98a	6	30945057..30959716	14660	4.46479	4.48266	4.63576	5.59962	5.59275	5.72683	4.52774	0.0939766	5.63973	0.0755061	FAM98A	family with sequence similarity 98, member A	Other	other	Common_Between_RNAseq_&_Microarray
G10644	Rasgrp3	6	complement(30966364..31029468)	63105	3	3	3	3.15043	3.1545	3.27852	3	0	3.19448	0.0728081	RASGRP3	RAS guanyl releasing protein 3 (calcium and DAG-regulated)	Cytoplasm	other	Common_Between_RNAseq_&_Microarray
G10646	Birc6	6	complement(31524882..31980891)	456010	3.61729	3.68786	3.73031	3.58823	3.57438	3.51007	3.67849	0.0570897	3.55756	0.0417037	BIRC6	baculoviral IAP repeat containing 6	Cytoplasm	enzyme	RNAseq_Specific
G10647	Ttc27	6	complement(31624976..31768786)	143811	3.36999	3.5475	3.53203	3.57499	3.59063	3.46387	3.48318	0.098325	3.54316	0.069112	TTC27	tetratricopeptide repeat domain 27	Other	other	RNAseq_Specific
G10648	Yipf4	6	complement(32015277..32026693)	11417	5.76712	5.87627	5.8525	5.78214	5.83605	5.76062	5.83196	0.0573995	5.79294	0.0388579	YIPF4	Yip1 domain family, member 4	Cytoplasm	other	Common_Between_RNAseq_&_Microarray
G10650	Slc30a6	6	complement(32084271..32113759)	29489	3.6114	3.59599	3.68953	3.3246	3.61551	3.36088	3.63231	0.0501522	3.43366	0.158524	SLC30A6	solute carrier family 30 (zinc transporter), member 6	Cytoplasm	transporter	RNAseq_Specific
G10652	Spast	6	complement(32118321..32168698)	50378	3.93981	3.94871	4.15732	4.25833	4.25002	4.07956	4.01528	0.123092	4.19597	0.100899	SPAST	spastin	Nucleus	enzyme	Common_Between_RNAseq_&_Microarray
G10653	Dpy30	6	32188946..32203027	14082	5.20682	5.08312	5.23908	4.88238	4.94946	5.00966	5.17634	0.0823262	4.94717	0.0636689	DPY30	dpy-30 homolog (C. elegans)	Nucleus	other	Common_Between_RNAseq_&_Microarray
G10654	Memo1	6	32248023..32295274	47252	5.32169	5.29967	5.3235	5.62556	5.57954	5.66661	5.31495	0.0132682	5.62391	0.043559	MEMO1	mediator of cell motility 1	Cytoplasm	other	Common_Between_RNAseq_&_Microarray
G10658	Alk	6	32580734..33082961	502228	3.09747	3	3	3.59063	3.4147	3.9132	3.03249	0.0562738	3.63951	0.252819	ALK	anaplastic lymphoma receptor tyrosine kinase	Plasma Membrane	kinase	Common_Between_RNAseq_&_Microarray
G10659	Clip4	6	complement(33101207..33150094)	48888	3.79714	3.60432	3.64121	3.84363	3.64062	3.71774	3.68089	0.102349	3.73399	0.102476	CLIP4	CAP-GLY domain containing linker protein family, member 4	Other	other	Common_Between_RNAseq_&_Microarray
G10662	Wdr43	6	complement(33299540..33339177)	39638	3.4315	3.49228	3.65843	3.77313	3.8111	3.8813	3.5274	0.11747	3.82184	0.05488	WDR43	WD repeat domain 43	Nucleus	other	RNAseq_Specific
G10664	Ppp1cb	6	complement(33416541..33448276)	31736	6.1918	6.22949	6.13278	6.57909	6.43062	6.40608	6.18469	0.0487447	6.47193	0.0936105	PPP1CB	protein phosphatase 1, catalytic subunit, beta isozyme	Cytoplasm	phosphatase	Common_Between_RNAseq_&_Microarray
G10667	Ypel5	6	33915155..33935174	20020	6.19288	6.23103	6.17702	6.29875	6.25927	6.17702	6.20031	0.0277594	6.24501	0.0621043	YPEL5	yippee-like 5 (Drosophila)	Other	other	Common_Between_RNAseq_&_Microarray
G10668	Lbh	6	34010039..34031267	21229	3.74865	3.92372	3.94121	4.03441	4.14269	4.19954	3.87119	0.106485	4.12555	0.0838888	LBH	limb bud and heart development	Nucleus	transcription regulator	RNAseq_Specific
G10672	Galnt14	6	complement(34618799..34832960)	214162	3.34818	3	3.14145	3.30137	3.39833	3.19675	3.16321	0.175109	3.29882	0.100813	GALNT14	UDP-N-acetyl-alpha-D-galactosamine:polypeptide N-acetylgalactosaminyltransferase 14 (GalNAc-T14)	Cytoplasm	enzyme	RNAseq_Specific
G10674	Ehd3	6	34923815..34948298	24484	4.79242	4.59545	4.43744	5.19722	5.03391	5.259	4.60843	0.177845	5.16338	0.116302	EHD3	EH-domain containing 3	Cytoplasm	other	Common_Between_RNAseq_&_Microarray
G10678	Fosl2	6	complement(35422541..35440258)	17718	3.92467	3.72704	3.40039	3.75239	3.46061	3.52332	3.68403	0.26477	3.57877	0.153592	Fosl2	fos-like antigen 2	Nucleus	transcription regulator	RNAseq_Specific
G10679	Bre	6	complement(35490054..35875542)	385489	5.66249	5.72887	5.63677	4.88625	5.03808	5.03168	5.67604	0.047524	4.98534	0.0858693	BRE	brain and reproductive organ-expressed (TNFRSF1A modulator)	Cytoplasm	other	Common_Between_RNAseq_&_Microarray
G1068	Tmem147	1	complement(90332928..90334759)	1832	5.45826	5.37065	5.44888	5.32259	5.57577	5.66249	5.42593	0.0481007	5.52028	0.17661	TMEM147	transmembrane protein 147	Other	other	Common_Between_RNAseq_&_Microarray
G10681	Rbks	6	35875927..35953018	77092	3.14145	3.1833	3.2651	3	3	3	3.19662	0.0628901	3	0	RBKS	ribokinase	Other	kinase	RNAseq_Specific
G10682	Mrpl33	6	complement(35954540..35962710)	8171	6.41498	6.31125	6.63575	6.21946	6.5675	6.3222	6.45399	0.165732	6.36972	0.178821	MRPL33	mitochondrial ribosomal protein L33	Cytoplasm	other	Common_Between_RNAseq_&_Microarray
G10684	Slc4a1ap	6	complement(36035092..36064887)	29796	4.57955	4.57683	4.77902	4.74658	4.76949	4.70161	4.64513	0.115957	4.73922	0.0345341	Slc4a1ap	solute carrier family 4 (anion exchanger), member 1, adaptor protein	Nucleus	other	Common_Between_RNAseq_&_Microarray
G10685	Supt7l	6	36065222..36075359	10138	3.4248	3.32316	3.34463	3.17298	3.25001	3.2077	3.3642	0.0535702	3.21023	0.0385795	SUPT7L	suppressor of Ty 7 (S. cerevisiae)-like	Nucleus	transcription regulator	RNAseq_Specific
G10686	Gpn1	6	complement(36078633..36096305)	17673	4.97038	4.92829	4.84521	4.52175	4.57318	4.48684	4.91463	0.0636965	4.52726	0.0434293	GPN1	GPN-loop GTPase 1	Nucleus	transcription regulator	Common_Between_RNAseq_&_Microarray
G10687	Zfp512	6	complement(36109571..36137715)	28145	4.06496	4.20972	4.08511	3.93791	3.82494	3.82084	4.11993	0.0784079	3.86123	0.066437	ZNF512	zinc finger protein 512	Nucleus	other	Common_Between_RNAseq_&_Microarray
G10690	Ift172	6	36210855..36304251	93397	4.92332	4.85174	4.81385	4.63867	4.49358	4.48362	4.86297	0.0555932	4.53862	0.0867841	Ift172	intraflagellar transport 172 homolog (Chlamydomonas)	Other	other	Common_Between_RNAseq_&_Microarray
G10693	Nrbp1	6	complement(36306032..36316531)	10500	5.66633	5.5812	5.51175	5.28604	5.31372	5.25542	5.58643	0.077421	5.28506	0.029161	Nrbp1	nuclear receptor binding protein 1	Other	other	Common_Between_RNAseq_&_Microarray
G10694	Ppm1g	6	36336359..36355553	19195	5.70182	5.62892	5.76937	5.56499	5.65535	5.70085	5.70004	0.070243	5.6404	0.0691557	PPM1G	protein phosphatase, Mg2+/Mn2+ dependent, 1G	Nucleus	phosphatase	Common_Between_RNAseq_&_Microarray
G10695	Zfp513	6	36355970..36359311	3342	3.7117	3.55854	3.74865	3.33179	3.50055	3.52519	3.67297	0.100801	3.45251	0.105273	ZNF513	zinc finger protein 513	Nucleus	other	Common_Between_RNAseq_&_Microarray
G10696	Snx17	6	complement(36359401..36361303)	1903	6.27034	6.22381	6.17792	5.82286	5.94673	6.07114	6.22402	0.0462127	5.94691	0.124139	SNX17	sorting nexin 17	Cytoplasm	transporter	Common_Between_RNAseq_&_Microarray
G10697	Eif2b4	6	36364317..36369267	4951	3.82847	3.63601	3.75878	4.02073	4.09064	4.18414	3.74108	0.0974432	4.09851	0.0819909	EIF2B4	eukaryotic translation initiation factor 2B, subunit 4 delta, 67kDa	Cytoplasm	translation regulator	Common_Between_RNAseq_&_Microarray
G10698	Gtf3c2	6	36383331..36401257	17927	3.84613	3.74545	3.90168	3.75132	3.76304	3.75132	3.83108	0.0791929	3.75523	0.00676397	GTF3C2	general transcription factor IIIC, polypeptide 2, beta 110kDa	Nucleus	transcription regulator	Common_Between_RNAseq_&_Microarray
G10699	Mpv17	6	36403896..36413172	9277	4.45694	4.33027	4.29442	3.93791	4.08212	4.17576	4.36054	0.0853804	4.06526	0.119816
G10700	Ucn	6	36418524..36419354	831	3	3	3	4.40272	4.00952	4.77134	3	0	4.39453	0.380976	UCN	urocortin	Extracellular Space	other	RNAseq_Specific
G10704	Cad	6	complement(36472498..36495450)	22953	3.49675	3.33465	3.37347	3.54071	3.48971	3.55854	3.40162	0.0846372	3.52966	0.035723	CAD	carbamoyl-phosphate synthetase 2, aspartate transcarbamylase, and dihydroorotase	Cytoplasm	enzyme	RNAseq_Specific
G10705	Atraid	6	complement(36495621..36500202)	4582	5.49457	5.55259	5.70182	5.75729	5.79986	6.03463	5.58299	0.106921	5.86393	0.14936	ATRAID	all-trans retinoic acid-induced differentiation factor	Nucleus	other	Common_Between_RNAseq_&_Microarray
G10706	Slc5a6	6	36500814..36512084	11271	4.9323	4.75594	4.76022	4.94081	4.90998	4.85546	4.81615	0.10061	4.90208	0.0432231	SLC5A6	solute carrier family 5 (sodium/multivitamin and iodide cotransporter), member 6	Plasma Membrane	transporter	Common_Between_RNAseq_&_Microarray
G10709	Preb	6	36599703..36603487	3785	5.20234	5.14354	5.17882	5.56407	5.5146	5.63401	5.1749	0.0295979	5.57089	0.0599988	PREB	prolactin regulatory element binding	Nucleus	transcription regulator	Common_Between_RNAseq_&_Microarray
G1071	Dmkn	1	90369376..90384906	15531	3	3	3	3.28889	3.09664	3.26286	3	0	3.21613	0.104298	Dmkn	dermokine	Extracellular Space	other	Common_Between_RNAseq_&_Microarray
G10710	Abhd1	6	complement(36603422..36608410)	4989	3.82494	3.85818	3.8396	4.06799	4.19993	4.29038	3.84091	0.0166571	4.1861	0.11184	ABHD1	abhydrolase domain containing 1	Other	other	RNAseq_Specific
G10711	Cgref1	6	36612741..36624744	12004	6.64774	6.54867	6.79064	7.28309	7.47663	7.53841	6.66235	0.121646	7.43271	0.133208	CGREF1	cell growth regulator with EF-hand domain 1	Extracellular Space	other	Common_Between_RNAseq_&_Microarray
G10712	Khk	6	complement(36626194..36636426)	10233	3.75878	3.78572	3.95521	3.83455	3.79924	3.98105	3.83324	0.10649	3.87161	0.0964077	KHK	ketohexokinase (fructokinase)	Cytoplasm	kinase	RNAseq_Specific
G10714	OST4	6	36651859..36653055	1197	5.30076	5.16341	5.36086	5.57304	5.66078	5.49361	5.27501	0.101212	5.57581	0.0836212	OST4	oligosaccharyltransferase 4 homolog (S. cerevisiae)	Other	other	Common_Between_RNAseq_&_Microarray
G10715	Agbl5	6	complement(36653651..36671181)	17531	3.77102	3.70673	3.91032	3.63309	3.68056	3.64121	3.79602	0.104073	3.65162	0.0253872	AGBL5	ATP/GTP binding protein-like 5	Cytoplasm	peptidase	RNAseq_Specific
G10716	Tmem214	6	complement(36684558..36692304)	7747	5.33925	5.20293	5.27694	5.11035	5.09944	5.22737	5.27304	0.0682452	5.14572	0.0709219	TMEM214	transmembrane protein 214	Extracellular Space	other	Common_Between_RNAseq_&_Microarray
G10717	Mapre3	6	complement(36695665..36706479)	10815	6.81967	6.70148	6.82483	6.49656	6.51412	6.52019	6.78199	0.0697741	6.51029	0.0122687	MAPRE3	microtubule-associated protein, RP/EB family, member 3	Cytoplasm	enzyme	Common_Between_RNAseq_&_Microarray
G10718	Dpysl5	6	complement(36756090..36840626)	84537	3.74813	3.93128	3.3658	3.83556	3.5518	3.57133	3.68174	0.288528	3.6529	0.158492	DPYSL5	dihydropyrimidinase-like 5	Cytoplasm	enzyme	RNAseq_Specific
G10720	Slc35f6	6	complement(36910714..36922551)	11838	4.14188	4.20894	4.03134	4.05501	4.06713	4.11213	4.12738	0.0896816	4.07809	0.0300958	SLC35F6	solute carrier family 35, member F6	Cytoplasm	other	RNAseq_Specific
G10723	Kcnk3	6	complement(36969854..37005778)	35925	3	3	3	3	3	3.2386	3	0	3.07953	0.137758	KCNK3	potassium channel, subfamily K, member 3	Plasma Membrane	ion channel	RNAseq_Specific
G10728	Drc1	6	complement(37237529..37272329)	34801	5.14394	5.06552	5.20937	4.32778	4.39793	4.2015	5.13961	0.0720242	4.30907	0.0995419	DRC1	dynein regulatory complex subunit 1 homolog (Chlamydomonas)	Extracellular Space	other	RNAseq_Specific
G10729	Ept1	6	complement(37285873..37297955)	12083	3.71004	3.70729	3.6901	4.09277	4.04191	3.89396	3.70248	0.0108056	4.00954	0.103282
G10732	Hadhb	6	complement(37366083..37393666)	27584	6.89291	6.91637	6.91751	7.24121	7.1436	7.21442	6.90893	0.0138823	7.19974	0.0504365	HADHB	hydroxyacyl-CoA dehydrogenase/3-ketoacyl-CoA thiolase/enoyl-CoA hydratase (trifunctional protein), beta subunit	Cytoplasm	enzyme	Common_Between_RNAseq_&_Microarray
G10733	Hadha	6	37400511..37439591	39081	7.08711	7.09073	7.01717	7.03697	6.99291	6.93854	7.065	0.0414635	6.98948	0.0493044	HADHA	hydroxyacyl-CoA dehydrogenase/3-ketoacyl-CoA thiolase/enoyl-CoA hydratase (trifunctional protein), alpha subunit	Cytoplasm	enzyme	Common_Between_RNAseq_&_Microarray
G10736	Rab10	6	complement(37479074..37531801)	52728	6.14476	6.28956	6.1102	6.53752	6.54342	6.49728	6.1815	0.0951592	6.52607	0.0251102	RAB10	RAB10, member RAS oncogene family	Cytoplasm	enzyme	Common_Between_RNAseq_&_Microarray
G10737	Kif3c	6	37579445..37625883	46439	5.31245	5.33497	5.14598	5.75435	5.54952	5.7343	5.26447	0.10323	5.67939	0.112921	KIF3C	kinesin family member 3C	Cytoplasm	other	Common_Between_RNAseq_&_Microarray
G10739	Dtnb	6	37788347..37986143	197797	3.37207	3.34888	3.40857	3.12585	3.14309	3.07452	3.37651	0.0300894	3.11448	0.0356681	DTNB	dystrobrevin, beta	Plasma Membrane	other	RNAseq_Specific
G10743	Dnmt3a	6	38044960..38149613	104654	3.6325	3.57255	3.49547	3.35315	3.4147	3.2386	3.56684	0.0686916	3.33548	0.0893649	DNMT3A	DNA (cytosine-5-)-methyltransferase 3 alpha	Nucleus	enzyme	RNAseq_Specific
G10746	Efr3b	6	complement(38203470..38235681)	32212	3.66127	3.84915	3.45536	4.02694	3.56587	3.59063	3.65526	0.196968	3.72781	0.259346	EFR3B	EFR3 homolog B (S. cerevisiae)	Other	other	RNAseq_Specific
G10747	Dnajc27	6	38322002..38351682	29681	5.30148	5.40647	5.1915	5.26276	5.24385	5.05249	5.29982	0.10749	5.18636	0.116327	DNAJC27	DnaJ (Hsp40) homolog, subfamily C, member 27	Cytoplasm	enzyme	Common_Between_RNAseq_&_Microarray
G10748	Adcy3	6	38378060..38454925	76866	5.24993	5.36471	5.06205	4.93373	4.71264	5.03699	5.22556	0.152797	4.89445	0.165702	ADCY3	adenylate cyclase 3	Plasma Membrane	enzyme	Common_Between_RNAseq_&_Microarray
G10751	Ptrhd1	6	38469515..38472900	3386	3.04768	3	3	3.17855	3.36999	3.33179	3.01589	0.0275284	3.29344	0.101315	PTRHD1	peptidyl-tRNA hydrolase domain containing 1	Other	other	Common_Between_RNAseq_&_Microarray
G10752	Ncoa1	6	complement(38483478..38734322)	250845	4.1221	4.27219	4.26322	4.16134	4.20737	4.14188	4.21917	0.0841821	4.17019	0.03363	NCOA1	nuclear receptor coactivator 1	Nucleus	transcription regulator	Common_Between_RNAseq_&_Microarray
G10759	ENSRNOG00000049659	6	39260308..39265164	4857	3	3	3	3	3.90168	3	3	0	3.30056	0.520584	LOC257642	rRNA promoter binding protein	Nucleus	transcription regulator	Common_Between_RNAseq_&_Microarray
G10766	Itsn2	6	39701691..39789879	88189	4.07058	4.10249	4.27071	4.67416	4.57349	4.61176	4.14793	0.107523	4.6198	0.0508186	ITSN2	intersectin 2	Cytoplasm	other	Common_Between_RNAseq_&_Microarray
G10771	0610009D07Rik	6	39886871..39895187	8317	3.94871	4.23288	4.31591	4.49037	4.70021	4.38794	4.16583	0.192564	4.52618	0.159186
G10772	Fkbp1b	6	complement(39899738..39908165)	8428	5.11492	5.21887	5.42958	5.12507	5.27023	4.7533	5.25446	0.160316	5.04954	0.266618	Fkbp1b	FK506 binding protein 1B	Cytoplasm	enzyme	Common_Between_RNAseq_&_Microarray
G10775	Klhl29	6	40403632..40706610	302979	3.2763	3.24698	3.17298	3.3043	3.3203	3.39077	3.23208	0.0532465	3.33846	0.0460094	KLHL29	kelch-like family member 29	Other	other	RNAseq_Specific
G10781	RGD1311648	6	43191256..43276852	85597	4.18613	4.24243	4.11046	4.29222	4.27332	4.26547	4.17967	0.0662249	4.277	0.0137483	C2orf43	chromosome 2 open reading frame 43	Other	enzyme	Common_Between_RNAseq_&_Microarray
G10783	Hs1bp3	6	43302693..43333012	30320	3.96266	3.89007	3.82948	3.9132	3.91128	4.04804	3.89407	0.0666773	3.95751	0.0784145	HS1BP3	HCLS1 binding protein 3	Other	other	RNAseq_Specific
G10784	Rhob	6	complement(43473992..43474582)	591	6.21665	6.14812	5.66206	5.91229	5.7658	5.99015	6.00894	0.302355	5.88941	0.113915	RHOB	ras homolog family member B	Cytoplasm	enzyme	Common_Between_RNAseq_&_Microarray
G10786	Pum2	6	43569102..43648162	79061	5.11222	5.25711	5.13701	5.37812	5.28659	5.22216	5.16878	0.0774967	5.29562	0.0783717	PUM2	pumilio RNA-binding family member 2	Cytoplasm	other	Common_Between_RNAseq_&_Microarray
G10788	Laptm4a	6	43822827..43841070	18244	7.45499	7.48264	7.47344	7.52037	7.54604	7.68827	7.47035	0.0140831	7.58489	0.0904446	LAPTM4A	lysosomal protein transmembrane 4 alpha	Cytoplasm	other	Common_Between_RNAseq_&_Microarray
G10790	Wdr35	6	43875471..43932450	56980	4.29333	4.34983	4.24661	4.17256	4.11338	3.94121	4.29659	0.0516856	4.07572	0.120185	Wdr35	WD repeat domain 35	Cytoplasm	other	RNAseq_Specific
G10792	RGD1561154	6	complement(44328054..44329993)	1940	8.80486	8.86583	8.80486	8.89411	9.30082	9.10329	8.82518	0.0352036	9.09941	0.203382	RGD1561154	similar to heat shock protein 8	Other	other	RNAseq_Specific
G10798	Rdh14	6	45868730..45873873	5144	4.19404	4.22289	4.24813	4.11338	4.21476	4.18175	4.22169	0.0270684	4.16996	0.0517059	RDH14	retinol dehydrogenase 14 (all-trans/9-cis/11-cis)	Cytoplasm	enzyme	Common_Between_RNAseq_&_Microarray
G1080	Usf2	1	complement(90527311..90538049)	10739	4.87404	4.79553	4.96205	4.70382	4.84247	4.7282	4.87721	0.0833077	4.75816	0.0740204	USF2	upstream transcription factor 2, c-fos interacting	Nucleus	transcription regulator	Common_Between_RNAseq_&_Microarray
G10803	Smc6	6	46691346..46744578	53233	4.30031	4.45036	4.35269	4.5537	4.46673	4.33743	4.36778	0.0761586	4.45262	0.108823	SMC6	structural maintenance of chromosomes 6	Nucleus	other	Common_Between_RNAseq_&_Microarray
G10804	Vsnl1	6	complement(46751474..46872211)	120738	6.76301	6.93577	6.91014	7.56253	6.97803	7.05942	6.86964	0.0932306	7.19999	0.31659	VSNL1	visinin-like 1	Cytoplasm	other	Common_Between_RNAseq_&_Microarray
G10806	Ddx1	6	complement(47188699..47219567)	30869	6.36439	6.38327	6.33851	6.59305	6.56514	6.60014	6.36206	0.022467	6.58611	0.0185032	DDX1	DEAD (Asp-Glu-Ala-Asp) box helicase 1	Nucleus	enzyme	Common_Between_RNAseq_&_Microarray
G10808	Nbas	6	47240439..47541152	300714	3.5444	3.52519	3.53638	3.71937	3.61846	3.60078	3.53532	0.00964863	3.64621	0.0639752	Nbas	neuroblastoma amplified sequence	Other	other	RNAseq_Specific
G1081	Lsr	1	complement(90539046..90554568)	15523	3.92562	3.80494	4.01267	3.71774	3.78262	3.9459	3.91441	0.104317	3.81542	0.117565	LSR	lipolysis stimulated lipoprotein receptor	Nucleus	transcription regulator	Common_Between_RNAseq_&_Microarray
G10812	Fam84a	6	complement(48123855..48128328)	4474	3.26883	3	3.11338	3	3.05723	3	3.12741	0.134965	3.01908	0.0330426	FAM84A	family with sequence similarity 84, member A	Other	other	Common_Between_RNAseq_&_Microarray
G10813	Trib2	6	complement(49774736..49798090)	23355	3	3	3	3.33963	3.23016	3.44876	3	0	3.33952	0.109302	Trib2	tribbles pseudokinase 2	Other	other	Common_Between_RNAseq_&_Microarray
G10817	Fam49a	6	50682248..50788037	105790	3.24166	3.50756	3.15609	4.37966	3.83606	4.11463	3.30177	0.183282	4.11011	0.271829	FAM49A	family with sequence similarity 49, member A	Other	other	RNAseq_Specific
G10822	Lpin1	6	complement(51534870..51602407)	67538	3.35102	3.2636	3.35102	3.44016	3.12254	3.40857	3.32188	0.0504708	3.32375	0.174975	LPIN1	lipin 1	Nucleus	phosphatase	Common_Between_RNAseq_&_Microarray
G10823	Ntsr2	6	51646002..51652450	6449	5.44491	5.33515	5.16783	3.94777	4.30213	3.94871	5.31596	0.139532	4.0662	0.204318	Ntsr2	neurotensin receptor 2	Plasma Membrane	G-protein coupled receptor	Common_Between_RNAseq_&_Microarray
G10825	E2f6	6	51811952..51828124	16173	5.05533	5.19663	5.12053	5.56453	5.56087	5.55551	5.12416	0.0707177	5.5603	0.00453703	E2F6	E2F transcription factor 6	Nucleus	transcription regulator	Common_Between_RNAseq_&_Microarray
G10826	Rock2	6	51952278..52006294	54017	3.47623	3.57559	3.35243	3.88228	3.62141	3.68729	3.46808	0.111802	3.73033	0.135656	ROCK2	Rho-associated, coiled-coil containing protein kinase 2	Cytoplasm	kinase	Common_Between_RNAseq_&_Microarray
G10827	Pqlc3	6	complement(52010004..52021578)	11575	3	3.01774	3.00971	3	3.18645	3	3.00915	0.00888138	3.06215	0.107647	PQLC3	PQ loop repeat containing 3	Other	other	Common_Between_RNAseq_&_Microarray
G10829	Kcnf1	6	complement(52191821..52193338)	1518	3	3	3	3.82442	3.23477	3.69791	3	0	3.5857	0.31043	KCNF1	potassium voltage-gated channel, subfamily F, member 1	Plasma Membrane	ion channel	RNAseq_Specific
G1083	Fxyd5	1	complement(90620339..90629722)	9384	5.70459	5.40969	5.49088	6.65685	6.23964	6.89966	5.53505	0.152334	6.59872	0.333826	FXYD5	FXYD domain containing ion transport regulator 5	Plasma Membrane	ion channel	Common_Between_RNAseq_&_Microarray
G10830	Pdia6	6	52289504..52306885	17382	8.34423	8.34423	8.19973	8.26464	8.32745	7.97947	8.29607	0.0834264	8.19052	0.185454	PDIA6	protein disulfide isomerase family A, member 6	Cytoplasm	enzyme	Common_Between_RNAseq_&_Microarray
G10831	Atp6v1c2	6	complement(52307213..52349242)	42030	3.44149	3.21702	3.37625	3.18645	3.13982	3.2077	3.34492	0.115468	3.17799	0.0347254	ATP6V1C2	ATPase, H+ transporting, lysosomal 42kDa, V1 subunit C2	Cytoplasm	transporter	RNAseq_Specific
G10832	Nol10	6	52376044..52460900	84857	3.61846	3.61729	3.704	3.87886	3.8188	3.7657	3.64658	0.0497254	3.82112	0.0566164	NOL10	nucleolar protein 10	Nucleus	other	Common_Between_RNAseq_&_Microarray
G10837	Odc1	6	52565188..52571771	6584	5.20293	5.29985	5.29544	5.75047	5.65764	5.66164	5.26607	0.0547281	5.68992	0.0524821	ODC1	ornithine decarboxylase 1	Cytoplasm	enzyme	Common_Between_RNAseq_&_Microarray
G10839	Hpcal1	6	52713426..52818871	105446	6.49896	6.70729	6.54867	6.14639	6.22381	6.03276	6.58497	0.108806	6.13432	0.0960932	HPCAL1	hippocalcin-like 1	Cytoplasm	other	Common_Between_RNAseq_&_Microarray
G1084	Fxyd7	1	complement(90630083..90639081)	8999	3.65787	3.95058	4.53799	3	3	3	4.04881	0.448207	3	0	FXYD7	FXYD domain containing ion transport regulator 7	Plasma Membrane	ion channel	Common_Between_RNAseq_&_Microarray
G10841	Kidins220	6	52955625..53048254	92630	5.86728	6.00349	5.72683	6.01077	5.93628	5.83958	5.86586	0.138334	5.92888	0.0858358	KIDINS220	kinase D-interacting substrate, 220kDa	Nucleus	transcription regulator	Common_Between_RNAseq_&_Microarray
G10842	Id2	6	complement(53083849..53086239)	2391	4.84545	4.6874	4.9076	4.51858	4.81513	4.6499	4.81348	0.113528	4.6612	0.148599	ID2	inhibitor of DNA binding 2, dominant negative helix-loop-helix protein	Nucleus	transcription regulator	Common_Between_RNAseq_&_Microarray
G10846	Cmpk2	6	54403782..54414584	10803	3.97278	3.95151	3.74972	3.63485	3.72156	3.49675	3.89134	0.123103	3.61772	0.11338	CMPK2	cytidine monophosphate (UMP-CMP) kinase 2, mitochondrial	Cytoplasm	kinase	Common_Between_RNAseq_&_Microarray
G1085	Fxyd1	1	complement(90639293..90642454)	3162	4.57864	4.1308	4.62501	3.1999	3.5518	3.18964	4.44481	0.272934	3.31378	0.206197	FXYD1	FXYD domain containing ion transport regulator 1	Plasma Membrane	ion channel	Common_Between_RNAseq_&_Microarray
G10853	Colec11	6	complement(56560203..56586487)	26285	3.75664	3.68225	3.69625	4.3449	4.02649	4.12667	3.71172	0.0395332	4.16602	0.162811	COLEC11	collectin sub-family member 11	Extracellular Space	other	Common_Between_RNAseq_&_Microarray
G10854	Rps7	6	complement(56601565..56606473)	4909	7.63404	7.64609	7.71798	7.20751	7.59415	7.5227	7.66604	0.0453868	7.44145	0.205728	RPS7	ribosomal protein S7	Cytoplasm	other	Common_Between_RNAseq_&_Microarray
G10855	Rnaseh1	6	56618249..56627607	9359	3.85064	3.80595	3.98105	3.92467	4.03705	4.05848	3.87921	0.0909815	4.00673	0.071873	RNASEH1	ribonuclease H1	Nucleus	enzyme	RNAseq_Specific
G10856	Adi1	6	56642239..56649206	6968	4.1312	4.08937	4.09277	4.04628	4.05848	3.98559	4.10445	0.0232341	4.03012	0.0390373	ADI1	acireductone dioxygenase 1	Nucleus	enzyme	Common_Between_RNAseq_&_Microarray
G10857	Trappc12	6	complement(56656859..56722274)	65416	5.06227	5.09078	4.92262	4.62791	4.68462	4.70244	5.02522	0.0899889	4.67166	0.0389213	TRAPPC12	trafficking protein particle complex 12	Other	other	Common_Between_RNAseq_&_Microarray
G10858	Tssc1	6	56832526..56837116	4591	4.84146	4.74604	5.02438	4.7225	4.80329	4.77955	4.87063	0.141443	4.76845	0.0415271	TSSC1	tumor suppressing subtransferable candidate 1	Other	other	Common_Between_RNAseq_&_Microarray
G10859	Myt1l	6	57146288..57529924	383637	3.66582	3.66185	3.40857	3.47623	3.25001	3.32245	3.57875	0.147394	3.34957	0.115522	MYT1L	myelin transcription factor 1-like	Nucleus	transcription regulator	Common_Between_RNAseq_&_Microarray
G1086	Lgi4	1	90647194..90656994	9801	4.86438	4.63169	4.78271	4.097	4.19915	3.7747	4.75959	0.118056	4.02362	0.221533	LGI4	leucine-rich repeat LGI family, member 4	Extracellular Space	other	Common_Between_RNAseq_&_Microarray
G10860	Pxdn	6	57551669..57661402	109734	3.2763	3.00433	3.03192	3.01059	3	3	3.10418	0.149696	3.00353	0.00611539	PXDN	peroxidasin homolog (Drosophila)	Extracellular Space	enzyme	RNAseq_Specific
G10863	Tmem18	6	58209471..58215201	5731	4.19679	4.41531	3.89007	4.54818	4.20345	4.23096	4.16739	0.26385	4.32753	0.191581	TMEM18	transmembrane protein 18	Nucleus	other	RNAseq_Specific
G10864	Fam150b	6	58505391..58514834	9444	5.5472	6.05039	6.07392	6.03463	4.73308	5.76977	5.8905	0.297541	5.51249	0.687862	FAM150B	family with sequence similarity 150, member B	Other	other	RNAseq_Specific
G10865	Acp1	6	complement(58515990..58531060)	15071	5.45102	5.41222	5.59006	6.04221	5.98459	5.88911	5.48443	0.0935105	5.97197	0.0773256	ACP1	acid phosphatase 1, soluble	Cytoplasm	phosphatase	Common_Between_RNAseq_&_Microarray
G10866	Sh3yl1	6	58531557..58574823	43267	3.64754	3.46845	3.8567	3.29551	3.17855	3.0633	3.65756	0.194317	3.17912	0.116104	SH3YL1	SH3 and SYLF domain containing 1	Plasma Membrane	other	RNAseq_Specific
G10870	Lamb1	6	59204204..59271185	66982	3.25532	3.29037	3	3.73301	3.50183	3.7657	3.1819	0.158498	3.66685	0.143843	LAMB1	laminin, beta 1	Extracellular Space	other	Common_Between_RNAseq_&_Microarray
G10871	Dld	6	complement(59273260..59293928)	20669	6.26275	6.37059	6.41979	6.65026	6.54373	6.41616	6.35104	0.0803212	6.53671	0.117209	DLD	dihydrolipoamide dehydrogenase	Cytoplasm	enzyme	Common_Between_RNAseq_&_Microarray
G10873	Cbll1	6	complement(59443728..59457590)	13863	3.15367	3.29256	3.45536	3.41061	3.40583	3.25532	3.30053	0.150999	3.35725	0.0883083	CBLL1	Cbl proto-oncogene-like 1, E3 ubiquitin protein ligase	Nucleus	enzyme	RNAseq_Specific
G10875	Bcap29	6	complement(59555828..59595518)	39691	4.31047	4.40033	4.57744	4.44276	4.40749	4.24434	4.42941	0.135839	4.36486	0.105853	BCAP29	B-cell receptor-associated protein 29	Cytoplasm	transporter	Common_Between_RNAseq_&_Microarray
G10877	Cog5	6	59615559..59901353	285795	3.70894	3.83758	3.68898	3.81675	3.91032	4.00368	3.74517	0.0806531	3.91025	0.0934637	Cog5	component of oligomeric golgi complex 5	Other	other	Common_Between_RNAseq_&_Microarray
G10879	Hbp1	6	complement(59902129..59928239)	26111	4.4697	4.50281	4.48234	4.51354	4.51858	4.48138	4.48495	0.0167112	4.5045	0.0201808	HBP1	HMG-box transcription factor 1	Nucleus	transcription regulator	Common_Between_RNAseq_&_Microarray
G10880	Prkar2b	6	complement(59936129..59968013)	31885	3.13982	3.3949	3.19675	3	3.09154	3	3.24382	0.133896	3.03051	0.0528534	PRKAR2B	protein kinase, cAMP-dependent, regulatory, type II, beta	Cytoplasm	kinase	Common_Between_RNAseq_&_Microarray
G10881	Asap2	6	60104140..60213869	109730	3.3658	3.17855	3.1308	3.41672	3.2651	3.24471	3.22505	0.124209	3.30884	0.0939775	ASAP2	ArfGAP with SH3 domain, ankyrin repeat and PH domain 2	Nucleus	other	Common_Between_RNAseq_&_Microarray
G10882	Itgb1bp1	6	complement(60216649..60231041)	14393	4.51764	4.49931	4.57106	4.69217	4.83012	4.82578	4.52934	0.0372771	4.78269	0.0784239	ITGB1BP1	integrin beta 1 binding protein 1	Plasma Membrane	transporter	Common_Between_RNAseq_&_Microarray
G10883	Cpsf3	6	60231498..60259421	27924	5.08418	5.13147	5.12734	5.02328	5.1026	4.96367	5.11433	0.0261937	5.02985	0.0696953	CPSF3	cleavage and polyadenylation specific factor 3, 73kDa	Nucleus	enzyme	Common_Between_RNAseq_&_Microarray
G10884	Iah1	6	60260794..60268037	7244	5.01502	5.06313	5.10154	4.8087	4.82962	4.91525	5.0599	0.0433544	4.85119	0.0564592	IAH1	isoamyl acetate-hydrolyzing esterase 1 homolog (S. cerevisiae)	Other	other	Common_Between_RNAseq_&_Microarray
G10885	Adam17	6	complement(60268237..60315989)	47753	3.72321	3.73248	3.79559	3.72704	3.739	3.74277	3.75043	0.0393869	3.73627	0.0082114	ADAM17	ADAM metallopeptidase domain 17	Plasma Membrane	peptidase	Common_Between_RNAseq_&_Microarray
G10887	Ywhaq	6	complement(60331003..60361242)	30240	7.82369	7.97569	7.86319	7.97947	8.01642	7.98246	7.88752	0.0788647	7.99278	0.0205267	YWHAQ	tyrosine 3-monooxygenase/tryptophan 5-monooxygenase activation protein, theta	Cytoplasm	other	Common_Between_RNAseq_&_Microarray
G10889	Taf1b	6	60512955..60589982	77028	3.53078	3.6325	3.59599	3.56587	3.5395	3.63017	3.58642	0.0515264	3.57851	0.0466374	TAF1B	TATA box binding protein (TBP)-associated factor, RNA polymerase I, B, 63kDa	Nucleus	transcription regulator	RNAseq_Specific
G1089	Scn1b	1	complement(90705285..90715018)	9734	5.32548	5.1533	4.93136	5.22775	5.16462	5.52387	5.13671	0.197587	5.30542	0.191803	SCN1B	sodium channel, voltage-gated, type I, beta subunit	Plasma Membrane	ion channel	Common_Between_RNAseq_&_Microarray
G10895	Mboat2	6	60881777..61003918	122142	3.87198	4.10667	3.81725	4.11338	3.98424	4.00909	3.93197	0.153754	4.03557	0.0685253	MBOAT2	membrane bound O-acyltransferase domain containing 2	Cytoplasm	enzyme	RNAseq_Specific
G1090	Gramd1a	1	complement(90718529..90740144)	21616	6.10224	5.91731	6.2463	5.79649	5.73268	5.71273	6.08862	0.164918	5.7473	0.0437527	GRAMD1A	GRAM domain containing 1A	Extracellular Space	other	RNAseq_Specific
G10900	Nampt	6	61753125..61787574	34450	5.89069	5.7658	5.6851	6.53169	6.38275	6.56277	5.78053	0.103584	6.4924	0.0962299	NAMPT	nicotinamide phosphoribosyltransferase	Extracellular Space	cytokine	Common_Between_RNAseq_&_Microarray
G10901	Sypl1	6	61891964..61910838	18875	5.76937	5.4757	5.54086	5.54117	5.39226	5.45003	5.59531	0.154218	5.46116	0.0750769	SYPL1	synaptophysin-like 1	Plasma Membrane	transporter	Common_Between_RNAseq_&_Microarray
G10907	ENSRNOG00000011040	6	complement(62442691..62444516)	1826	3.32389	3.32819	3.13818	3.86509	4.07658	4.02694	3.26342	0.108484	3.98953	0.110596	LOC680142	similar to translocase of outer mitochondrial membrane 70 homolog A	Other	other	RNAseq_Specific
G10911	Hdac9	6	complement(63111204..63679614)	568411	3.47753	3.93695	3.93839	4.9889	4.84447	5.08951	3.78429	0.265663	4.97429	0.123171	Hdac9	histone deacetylase 9	Other	transcription regulator	RNAseq_Specific
G10914	Snx13	6	64112186..64212889	100704	3.39627	3.68225	3.18884	3.89251	3.69457	3.82847	3.42245	0.247748	3.80518	0.101005	SNX13	sorting nexin 13	Cytoplasm	transporter	RNAseq_Specific
G10920	Tspan13	6	complement(65111579..65138717)	27139	7.03697	7.19318	7.05942	7.14309	7.22014	7.15259	7.09653	0.0844571	7.17194	0.0420103	TSPAN13	tetraspanin 13	Plasma Membrane	other	Common_Between_RNAseq_&_Microarray
G10921	Bzw2	6	complement(65200722..65261870)	61149	4.91167	4.92001	5.04922	5.20975	5.34102	5.40151	4.9603	0.077119	5.31743	0.0980304	BZW2	basic leucine zipper and W2 domains 2	Cytoplasm	translation regulator	Common_Between_RNAseq_&_Microarray
G10922	Ankmy2	6	65262213..65303138	40926	5.34921	5.3696	5.33978	5.21887	5.14271	5.11013	5.35286	0.0152433	5.15724	0.0558051	ANKMY2	ankyrin repeat and MYND domain containing 2	Plasma Membrane	other	Common_Between_RNAseq_&_Microarray
G10925	Ispd	6	65492817..65769833	277017	3	3	3	3.01595	3.07878	3	3	0	3.03158	0.0416496	ISPD	isoprenoid synthase domain containing	Other	enzyme	RNAseq_Specific
G10928	Meox2	6	66231863..66293008	61146	3.63717	3.52703	3.67261	4.01895	4.04541	4.05587	3.61227	0.0759126	4.04008	0.0190312	MEOX2	mesenchyme homeobox 2	Nucleus	transcription regulator	Common_Between_RNAseq_&_Microarray
G10932	Dgkb	6	67113446..67868708	755263	4.71731	4.83468	4.64213	4.73849	4.63576	4.47718	4.73137	0.0970443	4.61714	0.131648	DGKB	diacylglycerol kinase, beta 90kDa	Cytoplasm	kinase	Common_Between_RNAseq_&_Microarray
G10939	Arl4a	6	complement(69536689..69538783)	2095	3.25609	3.25304	3.62433	3.69791	3.87246	3.96033	3.37782	0.213487	3.84357	0.133578	ARL4A	ADP-ribosylation factor-like 4A	Nucleus	enzyme	Common_Between_RNAseq_&_Microarray
G10942	Ifrd1	6	complement(69720076..69739472)	19397	4.01177	4.06322	4.28741	4.49199	4.49931	4.63576	4.1208	0.146565	4.54236	0.0809725	Ifrd1	interferon-related developmental regulator 1	Other	other	Common_Between_RNAseq_&_Microarray
G10944	Zfp277	6	complement(69835901..69962618)	126718	3.79767	3.72922	4.03748	3.89154	3.95895	3.92467	3.85479	0.161876	3.92505	0.0337086	ZNF277	zinc finger protein 277	Nucleus	transcription regulator	Common_Between_RNAseq_&_Microarray
G10948	Lrrn3	6	complement(70956995..70987862)	30868	4.22635	4.58466	4.36429	4.1092	4.39173	4.29737	4.39177	0.180731	4.2661	0.14384	LRRN3	leucine rich repeat neuronal 3	Extracellular Space	other	Common_Between_RNAseq_&_Microarray
G10954	Dnajb9	6	complement(73754561..73758774)	4214	6.92662	6.98001	7.12907	7.45948	7.42331	7.45034	7.0119	0.104928	7.44438	0.018807	DNAJB9	DnaJ (Hsp40) homolog, subfamily B, member 9	Nucleus	other	Common_Between_RNAseq_&_Microarray
G10955	Pnpla8	6	73841473..73876145	34673	5.70777	5.85624	5.72751	5.86678	5.79805	5.66803	5.76384	0.0806262	5.77762	0.100936	PNPLA8	patatin-like phospholipase domain containing 8	Cytoplasm	enzyme	Common_Between_RNAseq_&_Microarray
G10957	Nrcam	6	74371672..74446689	75018	5.26481	5.38263	5.11929	5.35098	5.18993	5.17963	5.25558	0.131914	5.24018	0.096097	NRCAM	neuronal cell adhesion molecule	Plasma Membrane	other	Common_Between_RNAseq_&_Microarray
G10959	Stxbp6	6	complement(74671542..74901751)	230210	3.55854	3.67828	3.37207	3.19675	3.21702	3.03455	3.5363	0.15431	3.14944	0.100013	STXBP6	syntaxin binding protein 6 (amisyn)	Cytoplasm	other	Common_Between_RNAseq_&_Microarray
G10960	NOVA1	6	complement(76540824..76660498)	119675	4.8087	4.59991	4.68713	4.80432	4.65334	4.5063	4.69858	0.104864	4.65465	0.149012	NOVA1	neuro-oncological ventral antigen 1	Nucleus	other	RNAseq_Specific
G10967	Prkd1	6	complement(80601006..80914043)	313038	3	3	3	3	3.14145	3.08985	3	0	3.0771	0.0715825	PRKD1	protein kinase D1	Cytoplasm	kinase	RNAseq_Specific
G10969	Scfd1	6	81688281..81766841	78561	5.8157	5.96428	5.9659	6.10056	6.07092	6.00169	5.91529	0.0862536	6.05772	0.0507395	SCFD1	sec1 family domain containing 1	Cytoplasm	transporter	Common_Between_RNAseq_&_Microarray
G1097	Wtip	1	complement(91112725..91137956)	25232	3.2837	3	3.09409	3	3	3	3.12593	0.144506	3	0	WTIP	Wilms tumor 1 interacting protein	Nucleus	transcription regulator	Common_Between_RNAseq_&_Microarray
G10973	Strn3	6	complement(81940488..82026817)	86330	4.5063	4.53767	4.74712	4.75224	4.72928	4.70713	4.59703	0.130922	4.72955	0.0225548	STRN3	striatin, calmodulin binding protein 3	Nucleus	transcription regulator	Common_Between_RNAseq_&_Microarray
G10974	Ap4s1	6	82026136..82066641	40506	4.13655	4.14596	4.48813	4.35444	4.49996	4.40136	4.25688	0.200325	4.41859	0.0742726	AP4S1	adaptor-related protein complex 4, sigma 1 subunit	Cytoplasm	transporter	Common_Between_RNAseq_&_Microarray
G10975	Hectd1	6	complement(82073589..82157549)	83961	3.93646	4.0723	3.92657	4.02737	4.05543	4.00144	3.97844	0.0814314	4.02808	0.0270041	HECTD1	HECT domain containing E3 ubiquitin protein ligase 1	Other	enzyme	Common_Between_RNAseq_&_Microarray
G10976	Heatr5a	6	complement(82211313..82299967)	88655	3	3	3	3.1042	3.08476	3.07878	3	0	3.08924	0.0132886	HEATR5A	HEAT repeat containing 5A	Other	other	RNAseq_Specific
G10977	Dtd2	6	complement(82342355..82348642)	6288	3.80287	3.918	3.90408	3.61729	3.63833	3.63948	3.87498	0.0628374	3.6317	0.0124938	DTD2	D-tyrosyl-tRNA deacylase 2 (putative)	Other	other	RNAseq_Specific
G10979	Nubpl	6	82453613..82709215	255603	3.7784	3.83504	3.68729	3.65387	3.68056	3.74545	3.76691	0.0745434	3.69329	0.0470976	Nubpl	nucleotide binding protein-like	Cytoplasm	other	Common_Between_RNAseq_&_Microarray
G1098	Uba2	1	complement(91155863..91179053)	23191	6.3077	6.36919	6.30314	6.22236	6.10988	6.13996	6.32668	0.0368897	6.1574	0.0582312	UBA2	ubiquitin-like modifier activating enzyme 2	Cytoplasm	enzyme	Common_Between_RNAseq_&_Microarray
G10984	Akap6	6	83111482..83545576	434095	3.92749	4.01895	3.64467	4.24167	4.05587	4.0589	3.86371	0.195121	4.11881	0.106407	AKAP6	A kinase (PRKA) anchor protein 6	Nucleus	other	RNAseq_Specific
G10989	Rps10l1	6	84968907..84969452	546	5.9507	6.26341	5.09461	6.12371	6.20886	6.43454	5.76957	0.605088	6.25571	0.160625	RPS10-NUDT3	RPS10-NUDT3 readthrough	Cytoplasm	other	Common_Between_RNAseq_&_Microarray
G1099	Pdcd2l	1	complement(91189390..91201359)	11970	3.25834	3.29404	3.3203	3.17855	3.17298	3.29037	3.29089	0.0310984	3.21397	0.0662235	PDCD2L	programmed cell death 2-like	Other	other	RNAseq_Specific
G10991	Sptssa	6	complement(85080146..85091608)	11463	5.44987	5.64515	5.57803	4.8263	5.16723	5.0148	5.55768	0.0992214	5.00278	0.170784	SPTSSA	serine palmitoyltransferase, small subunit A	Cytoplasm	enzyme	Common_Between_RNAseq_&_Microarray
G10992	Eapp	6	complement(85107699..85129236)	21538	4.40952	4.63576	4.40136	4.56072	4.3727	4.29884	4.48221	0.133038	4.41075	0.135022	EAPP	E2F-associated phosphoprotein	Cytoplasm	other	Common_Between_RNAseq_&_Microarray
G10993	Snx6	6	complement(85166825..85210033)	43209	5.04377	5.20351	5.08162	5.25787	5.31572	5.32151	5.10964	0.0834732	5.29837	0.0351891	SNX6	sorting nexin 6	Cytoplasm	transporter	Common_Between_RNAseq_&_Microarray
G10994	Cfl2	6	complement(85300272..85304317)	4046	5.8885	5.91289	5.95396	6.06285	6.11697	6.12329	5.91845	0.0330844	6.10104	0.0332211	Cfl2	cofilin 2, muscle	Other	other	Common_Between_RNAseq_&_Microarray
G10996	RGD1304624	6	complement(85483144..85531929)	48786	3.25381	3.06157	3.45928	3.16174	3.37139	3.16253	3.25822	0.198889	3.23188	0.120813	2700097O09Rik	RIKEN cDNA 2700097O09 gene	Extracellular Space	other	RNAseq_Specific
G10997	Srp54	6	85532345..85572105	39761	4.73036	4.84696	4.80895	4.97199	4.94877	4.79786	4.79542	0.0594624	4.90621	0.0945439
G10998	ENSRNOG00000046391	6	85578014..85590447	12434	4.06452	4.06278	4.01088	3.80441	3.7106	3.81725	4.04606	0.0304824	3.77742	0.058222	FAM177A1	family with sequence similarity 177, member A1	Other	other	RNAseq_Specific
G10999	Ppp2r3c	6	complement(85593213..85615398)	22186	4.66504	4.64127	4.65705	4.85373	4.73661	4.74254	4.65445	0.0120968	4.77762	0.0659731	PPP2R3C	protein phosphatase 2, regulatory subunit B'', gamma	Cytoplasm	other	RNAseq_Specific
G110	Ahi1	1	18958623..19080397	121775	7.39519	7.44492	6.9945	6.71087	6.33217	6.24896	7.2782	0.246951	6.43067	0.246203	AHI1	Abelson helper integration site 1	Cytoplasm	other	Common_Between_RNAseq_&_Microarray
G1100	Gpi	1	complement(91207017..91234890)	27874	8.97661	8.99451	8.97661	8.80184	8.71034	8.79073	8.98258	0.010333	8.76764	0.0499277	GPI	glucose-6-phosphate isomerase	Extracellular Space	enzyme	Common_Between_RNAseq_&_Microarray
G11000	RGD1305089	6	85615614..85708813	93200	4.09996	4.05196	4.31916	4.17775	4.44076	4.31807	4.15702	0.14245	4.31219	0.131608	KIAA0391	KIAA0391	Other	other	Common_Between_RNAseq_&_Microarray
G11002	Psma6	6	85725314..85742471	17158	7.53528	7.46765	7.59987	7.51092	7.70725	7.61441	7.53427	0.0661147	7.61086	0.0982134	PSMA6	proteasome (prosome, macropain) subunit, alpha type, 6	Cytoplasm	peptidase	Common_Between_RNAseq_&_Microarray
G11003	Nfkbia	6	complement(85803991..85807223)	3233	4.83418	4.42068	4.61618	4.15692	4.48619	4.60109	4.62368	0.206849	4.41473	0.230542	NFKBIA	nuclear factor of kappa light polypeptide gene enhancer in B-cells inhibitor, alpha	Cytoplasm	transcription regulator	Common_Between_RNAseq_&_Microarray
G11006	Ralgapa1	6	complement(85920794..86131756)	210963	4.88918	4.91835	5.05097	5.04749	5.00676	4.84347	4.95283	0.086231	4.96591	0.107969	RALGAPA1	Ral GTPase activating protein, alpha subunit 1 (catalytic)	Cytoplasm	other	Common_Between_RNAseq_&_Microarray
G1101	RGD1308428	1	complement(91240941..91270158)	29218	3.4448	3.33035	3.40379	3.40449	3.32604	3.35102	3.39298	0.0579827	3.36051	0.0400752	RGD1308428	similar to RIKEN cDNA 4931406P16	Other	other	Common_Between_RNAseq_&_Microarray
G11012	Brms1l	6	86207478..86240310	32833	4.63374	4.73173	4.84948	4.58709	4.66733	4.50725	4.73832	0.10802	4.58722	0.080043	Brms1l	breast cancer metastasis-suppressor 1-like	Other	other	Common_Between_RNAseq_&_Microarray
G11015	Mbip	6	complement(86758207..86775445)	17239	4.01267	4.05976	3.99377	3.74008	4.02782	3.88519	4.02207	0.0339873	3.88437	0.143872	MBIP	MAP3K12 binding inhibitory protein 1	Nucleus	other	RNAseq_Specific
G11027	ENSRNOG00000042565	6	complement(88671069..88672066)	998	4.24167	4.04981	4.26246	4.39001	4.04981	4.3692	4.18465	0.117238	4.26967	0.190692	LOC687068	similar to L-lactate dehydrogenase A chain (LDH-A) (LDH muscle subunit) (LDH-M)	Other	other	RNAseq_Specific
G1103	Lsm14a	1	complement(91343533..91388619)	45087	4.57257	4.59693	4.54232	4.51576	4.59484	4.55888	4.57061	0.0273606	4.55649	0.0395923	LSM14A	LSM14A, SCD6 homolog A (S. cerevisiae)	Cytoplasm	other	Common_Between_RNAseq_&_Microarray
G11032	Sec23a	6	complement(89586788..89633108)	46321	6.17062	6.22033	5.96243	6.49824	6.32292	6.14149	6.11779	0.136823	6.32088	0.178381	SEC23A	Sec23 homolog A (S. cerevisiae)	Cytoplasm	transporter	RNAseq_Specific
G11034	Gemin2	6	89634623..89648253	13631	3.56709	3.65614	3.60846	3.32316	3.47753	3.28076	3.61056	0.0445627	3.36048	0.103557	GEMIN2	gem (nuclear organelle) associated protein 2	Nucleus	other	Common_Between_RNAseq_&_Microarray
G11035	Trappc6b	6	complement(89667998..89679088)	11091	6.36858	6.50191	6.56514	6.64061	6.89473	6.81826	6.47855	0.100339	6.78453	0.130375	TRAPPC6B	trafficking protein particle complex 6B	Cytoplasm	other	Common_Between_RNAseq_&_Microarray
G11036	Pnn	6	89685236..89693549	8314	5.83605	5.8212	5.9305	5.40595	5.38436	5.20975	5.86258	0.0592847	5.33336	0.107585	PNN	pinin, desmosome associated protein	Plasma Membrane	other	Common_Between_RNAseq_&_Microarray
G11038	Ctage5	6	89744666..89812332	67667	4.27257	4.28149	4.46479	4.65877	4.68797	4.71592	4.33962	0.108492	4.68755	0.0285791	Ctage5	CTAGE family, member 5	Other	other	RNAseq_Specific
G11039	Fbxo33	6	complement(89828089..89860308)	32220	3	3.27852	3.15123	3	3	3	3.14325	0.139431	3	0	FBXO33	F-box protein 33	Other	other	Common_Between_RNAseq_&_Microarray
G1104	Kctd15	1	complement(91645833..91659091)	13259	3.35243	3.33678	3.3203	3.18726	3.29625	3.37902	3.3365	0.0160665	3.28751	0.0961826	KCTD15	potassium channel tetramerization domain containing 15	Other	ion channel	Common_Between_RNAseq_&_Microarray
G11047	Lrfn5	6	92602956..92952468	349513	3.39285	3.56952	3.38179	3.15691	3	3.26586	3.44805	0.105339	3.14092	0.13365	LRFN5	leucine rich repeat and fibronectin type III domain containing 5	Nucleus	other	Common_Between_RNAseq_&_Microarray
G1105	Chst8	1	complement(91681357..91822788)	141432	4.98732	5.18717	4.87968	4.75647	4.65705	5.07605	5.01805	0.156033	4.82986	0.218928	CHST8	carbohydrate (N-acetylgalactosamine 4-0) sulfotransferase 8	Cytoplasm	enzyme	Common_Between_RNAseq_&_Microarray
G11057	Fam179b	6	96205062..96268221	63160	4.19364	3.98832	4.29811	4.12996	4.06626	3.87984	4.16002	0.157603	4.02536	0.129979	FAM179B	family with sequence similarity 179, member B	Extracellular Space	other	Common_Between_RNAseq_&_Microarray
G11058	Prpf39	6	96274790..96299787	24998	5.38332	5.26407	5.60511	5.36191	5.40816	5.1915	5.4175	0.173072	5.32052	0.114102	PRPF39	pre-mRNA processing factor 39	Nucleus	other	Common_Between_RNAseq_&_Microarray
G11059	Fkbp3	6	complement(96299844..96311094)	11251	7.67171	7.63803	7.79145	7.49023	7.52037	7.41936	7.7004	0.0806318	7.47666	0.0518573	FKBP3	FK506 binding protein 3, 25kDa	Nucleus	enzyme	Common_Between_RNAseq_&_Microarray
G11061	RGD1307897	6	96348000..96362690	14691	3.84161	3.66013	3.60137	4.47099	4.15205	4.3449	3.70104	0.125239	4.32265	0.160628	RGD1307897	similar to RIKEN cDNA C730036B14 gene	Other	other	RNAseq_Specific
G11067	Mdga2	6	complement(97931875..98773148)	841274	3.04854	3.03896	3.30576	3.6255	3.65214	3.55057	3.13108	0.151347	3.6094	0.0526623	MDGA2	MAM domain containing glycosylphosphatidylinositol anchor 2	Other	other	Common_Between_RNAseq_&_Microarray
G1107	Sdhaf1	1	92086132..92087079	948	4.41124	4.44374	4.62354	4.44209	4.78509	4.80562	4.49284	0.114351	4.6776	0.204215	SDHAF1	succinate dehydrogenase complex assembly factor 1	Cytoplasm	other	Common_Between_RNAseq_&_Microarray
G11077	Rps29	6	complement(100914108..100915476)	1369	7.0816	6.9632	7.1436	6.66071	6.90728	6.94049	7.0628	0.0916534	6.83616	0.152848	RPS29	ribosomal protein S29	Cytoplasm	other	Common_Between_RNAseq_&_Microarray
G11081	Mgat2	6	100935605..100938090	2486	4.20658	4.2863	4.34311	4.72466	4.75435	4.75835	4.27867	0.0685842	4.74578	0.0184034	MGAT2	mannosyl (alpha-1,6-)-glycoprotein beta-1,2-N-acetylglucosaminyltransferase	Cytoplasm	enzyme	Common_Between_RNAseq_&_Microarray
G11084	KLHDC1	6	100991376..101041810	50435	3	3	3.1308	3	3	3.04854	3.0436	0.0755148	3.01618	0.0280233	KLHDC1	kelch domain containing 1	Cytoplasm	other	Common_Between_RNAseq_&_Microarray
G11086	KLHDC2	6	101054620..101068438	13819	6.73159	6.82368	6.84591	6.66903	6.65799	6.51412	6.8004	0.0606148	6.61371	0.0864262	KLHDC2	kelch domain containing 2	Cytoplasm	other	Common_Between_RNAseq_&_Microarray
G11087	Nemf	6	complement(101068662..101132662)	64001	4.20776	4.24851	4.41192	4.22289	4.3727	4.11046	4.2894	0.108047	4.23535	0.131563	NEMF	nuclear export mediator factor	Nucleus	other	Common_Between_RNAseq_&_Microarray
G11090	Arf6	6	101150428..101151574	1147	4.60407	4.64097	4.55827	5.06509	4.98709	5.1051	4.6011	0.0414322	5.05243	0.0600183	ARF6	ADP-ribosylation factor 6	Plasma Membrane	transporter	Common_Between_RNAseq_&_Microarray
G11091	Mettl21d	6	complement(101330637..101336068)	5432	5.05293	4.87527	5.12652	5.08759	5.1543	5.29306	5.01824	0.12917	5.17832	0.10482	Mettl21d	methyltransferase like 21D	Other	other	Common_Between_RNAseq_&_Microarray
G11092	Sos2	6	complement(101337035..101457492)	120458	3.93695	4.07572	4.00863	3.91032	3.82948	3.8008	4.0071	0.0694019	3.84687	0.0567906	SOS2	son of sevenless homolog 2 (Drosophila)	Cytoplasm	other	Common_Between_RNAseq_&_Microarray
G11095	Atp5s	6	101507336..101525541	18206	3.52394	3.5798	3.63485	3.41061	3.40379	3.39285	3.57953	0.0554548	3.40242	0.00896299	ATP5S	ATP synthase, H+ transporting, mitochondrial Fo complex, subunit s (factor B)	Cytoplasm	transporter	RNAseq_Specific
G11096	Cdkl1	6	complement(101526936..101570647)	43712	3.2636	3.32675	3.36999	3.17696	3.23554	3.00253	3.32011	0.0535065	3.13834	0.121213	CDKL1	cyclin-dependent kinase-like 1 (CDC2-related kinase)	Nucleus	kinase	RNAseq_Specific
G11097	Map4k5	6	complement(101586288..101678374)	92087	4.34983	4.372	4.25457	4.29884	4.26171	4.11379	4.32547	0.0623926	4.22478	0.0978948	MAP4K5	mitogen-activated protein kinase kinase kinase kinase 5	Cytoplasm	kinase	Common_Between_RNAseq_&_Microarray
G11098	Atl1	6	101678899..101819541	140643	6.3705	6.39051	6.53044	6.51041	6.48018	6.48252	6.43048	0.087141	6.49103	0.0168177	ATL1	atlastin GTPase 1	Cytoplasm	enzyme	Common_Between_RNAseq_&_Microarray
G11099	Sav1	6	complement(101825584..101846408)	20825	3.14635	3.35597	3.25532	3.67431	3.65387	3.66638	3.25255	0.104837	3.66486	0.0103048	SAV1	salvador homolog 1 (Drosophila)	Cytoplasm	other	Common_Between_RNAseq_&_Microarray
G111	ENSRNOG00000046617	1	19126968..19149888	22921	8.08306	8.11873	8.19014	7.34041	7.34319	6.96907	8.13064	0.0545231	7.21756	0.2152
G11103	Trim9	6	complement(102107774..102207427)	99654	4.36147	4.52988	4.26547	4.14799	4.16536	3.92562	4.3856	0.133847	4.07966	0.133685	TRIM9	tripartite motif containing 9	Cytoplasm	enzyme	RNAseq_Specific
G11104	Tmx1	6	102311253..102321357	10105	8.14613	8.10133	8.01642	8.48776	8.26464	8.35946	8.08796	0.0658813	8.37062	0.111977	TMX1	thioredoxin-related transmembrane protein 1	Cytoplasm	enzyme	Common_Between_RNAseq_&_Microarray
G11107	Actr10	6	102831244..102857628	26385	5.91886	5.99627	6.06974	6.10988	6.19042	6.10392	5.99496	0.0754465	6.13474	0.0483109	ACTR10	actin-related protein 10 homolog (S. cerevisiae)	Cytoplasm	other	Common_Between_RNAseq_&_Microarray
G11108	Psma3	6	102868534..102898750	30217	5.14088	5.23372	5.36629	5.42454	5.6343	5.39433	5.24696	0.113289	5.48439	0.130704	PSMA3	proteasome (prosome, macropain) subunit, alpha type, 3	Cytoplasm	peptidase	Common_Between_RNAseq_&_Microarray
G11109	Arid4a	6	102917436..102998489	81054	3.32748	3.34106	3.4448	3.35384	3.43883	3.28297	3.37111	0.064172	3.35855	0.0780343	ARID4A	AT rich interactive domain 4A (RBP1-like)	Nucleus	transcription regulator	Common_Between_RNAseq_&_Microarray
G11110	TIMM9	6	complement(103015075..103027902)	12828	5.64111	5.644	5.89603	5.60511	5.713	5.53013	5.72705	0.14635	5.61608	0.0919285	TIMM9	translocase of inner mitochondrial membrane 9 homolog (yeast)	Cytoplasm	transporter	Common_Between_RNAseq_&_Microarray
G11111	2700049A03Rik	6	103029034..103132204	103171	3	3	3.03807	3	3	3	3.01269	0.0219773	3	0
G11112	Dact1	6	103201967..103211190	9224	3.06503	3.25078	3	3	3	3	3.10527	0.130145	3	0	DACT1	dishevelled-binding antagonist of beta-catenin 1	Cytoplasm	other	Common_Between_RNAseq_&_Microarray
G11116	Ppm1a	6	103918826..103929711	10886	6.29444	6.396	6.25285	6.89722	6.7288	6.80426	6.31443	0.0736386	6.81009	0.0843587	PPM1A	protein phosphatase, Mg2+/Mn2+ dependent, 1A	Cytoplasm	phosphatase	Common_Between_RNAseq_&_Microarray
G11117	Daam1	6	104080527..104183583	103057	3.68507	3.8325	3.8188	3.71664	3.75132	3.65614	3.77879	0.081451	3.70803	0.0481698	DAAM1	dishevelled associated activator of morphogenesis 1	Cytoplasm	other	Common_Between_RNAseq_&_Microarray
G11120	Jkamp	6	104280504..104294443	13940	5.04115	5.25409	5.07713	5.32386	5.31971	5.31971	5.12412	0.113983	5.32109	0.0023959	JKAMP	JNK1/MAPK8-associated membrane protein	Cytoplasm	other	Common_Between_RNAseq_&_Microarray
G11122	RTN1	6	complement(104395869..104615205)	219337	9.05089	9.16839	9.05089	8.70371	8.6498	8.66729	9.09006	0.0678396	8.6736	0.0275065	RTN1	reticulon 1	Cytoplasm	other	Common_Between_RNAseq_&_Microarray
G11125	Pcnxl4	6	104761251..104792348	31098	5.26818	5.28899	4.99341	5.24117	4.95623	4.71428	5.18353	0.164974	4.97056	0.263734	PCNXL4	pecanex-like 4 (Drosophila)	Other	other	Common_Between_RNAseq_&_Microarray
G11128	Dhrs7	6	complement(104960581..104979170)	18590	4.51764	4.60348	4.64299	4.7447	4.96691	4.95508	4.58804	0.064086	4.8889	0.125016	Dhrs7/LOC690226	dehydrogenase/reductase (SDR family) member 7	Other	other	RNAseq_Specific
G11132	ENSRNOG00000033058	6	105263680..105285477	21798	3.39354	4.04804	4.60169	3.58521	4.4749	3.54134	4.01443	0.604776	3.86715	0.526779	LOC100362049	ribosomal protein L35a-like	Other	other	RNAseq_Specific
G11136	Mnat1	6	105442513..105587332	144820	4.10039	4.10333	4.23402	4.21592	4.47261	4.39104	4.14591	0.0763195	4.35986	0.131154	MNAT1	MNAT CDK-activating kinase assembly factor 1	Nucleus	other	Common_Between_RNAseq_&_Microarray
G11137	Trmt5	6	complement(105596366..105601887)	5522	3.20067	3.14391	3.18726	3.10084	3.37556	3.34463	3.17728	0.0296643	3.27368	0.15048	TRMT5	tRNA methyltransferase 5	Other	other	Common_Between_RNAseq_&_Microarray
G11144	Hif1a	6	106242730..106287704	44975	5.57365	5.65807	5.70777	6.13514	5.92077	6.08534	5.64649	0.0678062	6.04708	0.11219	HIF1A	hypoxia inducible factor 1, alpha subunit (basic helix-loop-helix transcription factor)	Nucleus	transcription regulator	Common_Between_RNAseq_&_Microarray
G11145	Snapc1	6	106302977..106324704	21728	3.65957	3.7657	3.90551	3.77208	3.85718	3.93791	3.77693	0.123355	3.85572	0.0829258	SNAPC1	small nuclear RNA activating complex, polypeptide 1, 43kDa	Nucleus	other	Common_Between_RNAseq_&_Microarray
G11149	Rhoj	6	107702937..107785229	82293	3.90551	4.19915	3.9792	3.97462	3.871	3.91224	4.02795	0.152767	3.91928	0.0521708	RHOJ	ras homolog family member J	Cytoplasm	enzyme	Common_Between_RNAseq_&_Microarray
G1115	Tbcb	1	92179817..92185665	5849	6.06554	6.30387	6.38275	5.9305	6.27594	6.07659	6.25072	0.165145	6.09434	0.173401	TBCB	tubulin folding cofactor B	Cytoplasm	other	Common_Between_RNAseq_&_Microarray
G11151	Ppp2r5e	6	complement(107836104..107985205)	149102	3.70178	3.71664	3.66299	3.87443	3.86559	3.87246	3.6938	0.0276991	3.87083	0.00464052	PPP2R5E	protein phosphatase 2, regulatory subunit B', epsilon isoform	Cytoplasm	phosphatase	Common_Between_RNAseq_&_Microarray
G11153	Sgpp1	6	complement(108094887..108114210)	19324	3.77313	3.89007	3.49228	3.94684	3.66865	3.56587	3.71849	0.204447	3.72712	0.197098	SGPP1	sphingosine-1-phosphate phosphatase 1	Cytoplasm	phosphatase	Common_Between_RNAseq_&_Microarray
G11155	ENSRNOG00000005323	6	108493028..108565605	72578	3.52332	3.48779	3.52143	3.05464	3	3	3.51085	0.0199872	3.01821	0.0315486	SYNE2	spectrin repeat containing, nuclear envelope 2	Nucleus	other	Common_Between_RNAseq_&_Microarray
G11158	Mthfd1	6	108694405..108761891	67487	4.16174	4.20658	4.20737	4.07572	4.17456	4.13613	4.19189	0.0261216	4.12881	0.0498257	MTHFD1	methylenetetrahydrofolate dehydrogenase (NADP+ dependent) 1, methenyltetrahydrofolate cyclohydrolase, formyltetrahydrofolate synthetase	Cytoplasm	enzyme	Common_Between_RNAseq_&_Microarray
G1116	Capns1	1	complement(92195711..92201110)	5400	6.86	7.186	6.94049	6.61029	6.79785	6.64082	6.9955	0.169819	6.68299	0.100642	CAPNS1	calpain, small subunit 1	Cytoplasm	peptidase	Common_Between_RNAseq_&_Microarray
G11162	Hspa2	6	108843800..108846300	2501	3	3.06934	3	3	3	3	3.02311	0.0400356	3	0	HSPA2	heat shock 70kDa protein 2	Cytoplasm	other	RNAseq_Specific
G11163	Ppp1r36	6	108854061..108874065	20005	5.28141	5.50016	5.46839	5.2177	5.29379	5.31227	5.41665	0.118197	5.27459	0.0501216	PPP1R36	protein phosphatase 1, regulatory subunit 36	Other	other	Common_Between_RNAseq_&_Microarray
G11167	Churc1	6	109213899..109228029	14131	5.27023	5.199	5.49361	4.97863	5.10281	5.10594	5.32095	0.153709	5.06246	0.0726138	CHURC1	churchill domain containing 1	Nucleus	transcription regulator	Common_Between_RNAseq_&_Microarray
G11168	Rab15	6	complement(109242428..109266332)	23905	4.33206	4.39793	4.31699	4.44573	4.51513	4.84347	4.34899	0.0430448	4.60145	0.212454	Rab15	RAB15, member RAS oncogene family	Cytoplasm	enzyme	Common_Between_RNAseq_&_Microarray
G11169	Fntb	6	109278424..109361572	83149	3.7352	3.69457	3.65273	3.44149	3.55426	3.32245	3.69417	0.0412393	3.4394	0.115919	FNTB	farnesyltransferase, CAAX box, beta	Cytoplasm	enzyme	Common_Between_RNAseq_&_Microarray
G11170	Max	6	complement(109378844..109403735)	24892	5.39192	5.36296	5.41814	5.32169	5.4381	5.49425	5.39101	0.0276015	5.41801	0.0880143	MAX	MYC associated factor X	Nucleus	transcription regulator	Common_Between_RNAseq_&_Microarray
G11171	Fut8	6	109693324..109922266	228943	4.37932	4.34948	4.31338	4.50757	4.38828	4.35054	4.34739	0.0330191	4.41546	0.0819705	FUT8	fucosyltransferase 8 (alpha (1,6) fucosyltransferase)	Cytoplasm	enzyme	Common_Between_RNAseq_&_Microarray
G11173	Gphn	6	110978550..111237656	259107	5.08865	5.20234	5.29176	5.16058	5.07112	5.15107	5.19425	0.101794	5.12759	0.0491371	GPHN	gephyrin	Plasma Membrane	enzyme	Common_Between_RNAseq_&_Microarray
G11175	Mpp5	6	111299906..111403406	103501	3.89057	3.99558	3.8111	4.04981	3.92467	3.89493	3.89908	0.092536	3.95647	0.0821907	MPP5	membrane protein, palmitoylated 5 (MAGUK p55 subfamily member 5)	Plasma Membrane	kinase	Common_Between_RNAseq_&_Microarray
G11176	Atp6v1d	6	complement(111407090..111421805)	14716	7.23918	7.22105	7.21442	7.25106	7.2564	7.2452	7.22488	0.0128172	7.25089	0.00559818	ATP6V1D	ATPase, H+ transporting, lysosomal 34kDa, V1 subunit D	Cytoplasm	transporter	Common_Between_RNAseq_&_Microarray
G11177	Eif2s1	6	111422340..111447066	24727	5.12775	5.12218	5.14965	5.34921	5.37013	5.31463	5.13319	0.014521	5.34465	0.0280265	EIF2S1	eukaryotic translation initiation factor 2, subunit 1 alpha, 35kDa	Cytoplasm	translation regulator	Common_Between_RNAseq_&_Microarray
G11179	Tmem229b	6	complement(111524858..111565742)	40885	3.20926	3.17855	3.18884	3.54997	3.26586	3.35102	3.19222	0.0156312	3.38895	0.145803	TMEM229B	transmembrane protein 229B	Other	other	Common_Between_RNAseq_&_Microarray
G11180	Plekhh1	6	111585028..111633992	48965	3	3	3	3.08476	3	3	3	0	3.02825	0.0489351	PLEKHH1	pleckstrin homology domain containing, family H (with MyTH4 domain) member 1	Cytoplasm	other	Common_Between_RNAseq_&_Microarray
G11181	Pigh	6	complement(111632984..111642424)	9441	4.17176	3.95521	4.34912	4.05718	4.02558	3.94871	4.1587	0.197279	4.01049	0.0557902	PIGH	phosphatidylinositol glycan anchor biosynthesis, class H	Cytoplasm	enzyme	RNAseq_Specific
G11182	Dcaf5	6	complement(111691590..111780260)	88671	4.45298	4.41124	4.32312	4.44407	4.43944	4.43211	4.39578	0.0662929	4.43854	0.00602997	DCAF5	DDB1 and CUL4 associated factor 5	Cytoplasm	other	Common_Between_RNAseq_&_Microarray
G11197	Exd2	6	112192710..112226140	33431	3.67034	3.7593	3.74116	3.68507	3.74655	3.7657	3.7236	0.0470076	3.73244	0.0421248	EXD2	exonuclease 3'-5' domain containing 2	Other	other	Common_Between_RNAseq_&_Microarray
G11198	Galnt16	6	112246063..112422114	176052	3.99875	4.07614	3.60078	3.75612	3.77262	4.04584	3.89189	0.255061	3.85819	0.162714	GALNT16	UDP-N-acetyl-alpha-D-galactosamine:polypeptide N-acetylgalactosaminyltransferase 16	Cytoplasm	enzyme	Common_Between_RNAseq_&_Microarray
G11199	Erh	6	complement(112452339..112461605)	9267	5.59081	5.73268	5.79311	5.69738	5.97108	5.83719	5.70553	0.103844	5.83522	0.13686	ERH	enhancer of rudimentary homolog (Drosophila)	Nucleus	other	Common_Between_RNAseq_&_Microarray
G1120	Pdcd5	1	complement(92303910..92309238)	5329	5.87566	5.8885	6.04428	5.55397	5.85624	5.79986	5.93615	0.0938701	5.73669	0.160729	PDCD5	programmed cell death 5	Nucleus	other	Common_Between_RNAseq_&_Microarray
G11200	Slc39a9	6	112463008..112498488	35481	3.30796	3.45601	3	3.39354	3.07365	3.11756	3.25465	0.232629	3.19492	0.173412	SLC39A9	solute carrier family 39, member 9	Other	transporter	RNAseq_Specific
G11205	Srsf5	6	112776230..112780506	4277	8.55198	8.65616	8.66729	7.913	8.01574	7.77422	8.62514	0.0636071	7.90099	0.121209	SRSF5	serine/arginine-rich splicing factor 5	Nucleus	other	Common_Between_RNAseq_&_Microarray
G11206	Slc10a1	6	complement(112782934..112796559)	13626	3	3	3.03015	3	3	3	3.01005	0.0174091	3	0	SLC10A1	solute carrier family 10 (sodium/bile acid cotransporter), member 1	Plasma Membrane	transporter	RNAseq_Specific
G11208	Smoc1	6	112880630..113039729	159100	4.97863	4.73551	4.6562	3.91415	3.95895	4.09361	4.79012	0.168008	3.98891	0.0934043	SMOC1	SPARC related modular calcium binding 1	Extracellular Space	other	Common_Between_RNAseq_&_Microarray
G11210	Slc8a3	6	complement(113051975..113244454)	192480	3.98604	3.90408	4.03398	3.9156	3.80798	3.58764	3.9747	0.0656907	3.77041	0.167177	SLC8A3	solute carrier family 8 (sodium/calcium exchanger), member 3	Plasma Membrane	transporter	RNAseq_Specific
G11213	Cox16	6	complement(113347562..113360496)	12935	4.36077	4.38553	4.58768	4.50092	4.6499	4.56404	4.44466	0.124476	4.57162	0.0747793	COX16	COX16 cytochrome c oxidase assembly homolog (S. cerevisiae)	Cytoplasm	other	RNAseq_Specific
G11214	Synj2bp	6	complement(113374941..113407704)	32764	3.85917	3.86017	3.68786	3.98334	3.74116	3.62843	3.8024	0.0991946	3.78431	0.181349	SYNJ2BP	synaptojanin 2 binding protein	Cytoplasm	other	Common_Between_RNAseq_&_Microarray
G11216	Med6	6	complement(113448725..113462191)	13467	4.33564	4.38035	4.40545	4.29333	4.35374	4.30432	4.37381	0.0353631	4.31713	0.0321785	MED6	mediator complex subunit 6	Nucleus	transcription regulator	Common_Between_RNAseq_&_Microarray
G11217	Ttc9	6	113510909..113545657	34749	3.82494	3.94027	3.96404	4.69078	4.65877	4.83921	3.90975	0.0744004	4.72958	0.0962768	TTC9	tetratricopeptide repeat domain 9	Extracellular Space	other	Common_Between_RNAseq_&_Microarray
G11219	Pcnx	6	113754112..113886060	131949	3.93315	4.03002	3.72813	4.01223	3.71827	3.7784	3.8971	0.154141	3.8363	0.155296	PCNX	pecanex homolog (Drosophila)	Plasma Membrane	other	Common_Between_RNAseq_&_Microarray
G1122	Pepd	1	92392878..92416063	23186	5.08609	4.99521	5.00112	4.73661	4.63809	4.66761	5.02747	0.0508525	4.68077	0.0505588	PEPD	peptidase D	Cytoplasm	peptidase	Common_Between_RNAseq_&_Microarray
G11222	Sipa1l1	6	114214346..114304630	90285	3.32675	3.38179	3.19518	3.37902	3.42546	3.58222	3.30124	0.0958872	3.46223	0.10647	SIPA1L1	signal-induced proliferation-associated 1 like 1	Cytoplasm	other	Common_Between_RNAseq_&_Microarray
G11226	Arg2	6	114998810..115025299	26490	4.66562	4.62354	4.62296	4.96367	4.9993	4.90927	4.63737	0.0244647	4.95741	0.0453421	ARG2	arginase 2	Cytoplasm	enzyme	Common_Between_RNAseq_&_Microarray
G11227	Vti1b	6	complement(115026970..115040094)	13125	5.99015	5.95513	6.03144	5.93156	6.11936	5.98402	5.99224	0.038199	6.01165	0.0968962	Vti1b	vesicle transport through interaction with t-SNAREs 1B	Cytoplasm	other	RNAseq_Specific
G11228	Rdh11	6	complement(115043173..115059292)	16120	4.82835	4.72684	4.87133	5.29176	5.19623	5.28364	4.80884	0.0741935	5.25721	0.0529628	RDH11	retinol dehydrogenase 11 (all-trans/9-cis/11-cis)	Cytoplasm	enzyme	Common_Between_RNAseq_&_Microarray
G1123	Cebpg	1	complement(92418852..92427591)	8740	4.38138	4.46154	4.52832	5.17263	5.02794	5.10531	4.45708	0.0735701	5.10196	0.0724011	CEBPG	CCAAT/enhancer binding protein (C/EBP), gamma	Nucleus	transcription regulator	Common_Between_RNAseq_&_Microarray
G11235	Zfp36l1	6	complement(115988971..115992268)	3298	3.77156	3.79714	3.43684	3.72978	3.53391	3.6901	3.66851	0.201041	3.65126	0.103546	ZFP36L1	ZFP36 ring finger protein-like 1	Nucleus	transcription regulator	Common_Between_RNAseq_&_Microarray
G11236	Actn1	6	complement(116056248..116149475)	93228	5.05097	4.88042	4.89506	4.92759	4.79605	4.91429	4.94215	0.0945253	4.87931	0.0724104	ACTN1	actinin, alpha 1	Cytoplasm	other	Common_Between_RNAseq_&_Microarray
G11238	Fos	6	complement(116249742..116252608)	2867	3	3	3.06503	3.85718	3.12254	4.50819	3.02168	0.0375427	3.8293	0.69325	FOS	FBJ murine osteosarcoma viral oncogene homolog	Nucleus	transcription regulator	Common_Between_RNAseq_&_Microarray
G11239	Tmed10	6	116347918..116383215	35298	7.27283	7.33142	7.24121	7.60257	7.49023	7.6058	7.28182	0.0457722	7.5662	0.0658087	TMED10	transmembrane emp24-like trafficking protein 10 (yeast)	Cytoplasm	transporter	Common_Between_RNAseq_&_Microarray
G11240	Nek9	6	116390547..116435517	44971	4.2852	4.17695	4.13202	4.14391	4.10794	4.16254	4.19806	0.0787369	4.13813	0.0277583	NEK9	NIMA-related kinase 9	Nucleus	kinase	Common_Between_RNAseq_&_Microarray
G11242	Acyp1	6	116453047..116459981	6935	4.41865	4.32671	4.53173	4.02426	4.18929	4.19993	4.42569	0.102689	4.13783	0.0984946	ACYP1	acylphosphatase 1, erythrocyte (common) type	Other	enzyme	Common_Between_RNAseq_&_Microarray
G11244	Eif2b2	6	complement(116505786..116512219)	6434	5.38436	5.47473	5.30003	5.19052	5.14536	5.18182	5.38637	0.0873675	5.17257	0.0239567	EIF2B2	eukaryotic translation initiation factor 2B, subunit 2 beta, 39kDa	Cytoplasm	translation regulator	Common_Between_RNAseq_&_Microarray
G11246	Rps6kl1	6	116581249..116594985	13737	5.33978	5.21325	5.21325	4.2636	4.39828	4.4126	5.25543	0.0730537	4.35816	0.0822036	Rps6kl1	ribosomal protein S6 kinase-like 1	Other	other	RNAseq_Specific
G11247	Dlst	6	complement(116597173..116620312)	23140	6.13679	6.11832	5.95268	6.1815	6.14954	6.041	6.06926	0.101382	6.12401	0.0736457	DLST	dihydrolipoamide S-succinyltransferase (E2 component of 2-oxo-glutarate complex)	Cytoplasm	enzyme	Common_Between_RNAseq_&_Microarray
G11249	Ylpm1	6	complement(116659702..116735987)	76286	4.69744	4.66903	4.68602	4.57955	4.45101	4.32778	4.68416	0.0142961	4.45278	0.125892	YLPM1	YLP motif containing 1	Nucleus	other	Common_Between_RNAseq_&_Microarray
G1125	Slc7a10	1	92563400..92579262	15863	3.87984	3.93458	4.30213	3.82238	3.84764	3.64698	4.03885	0.229643	3.77233	0.109293	SLC7A10	solute carrier family 7 (neutral amino acid transporter light chain, asc system), member 10	Plasma Membrane	transporter	Common_Between_RNAseq_&_Microarray
G11251	Fcf1	6	complement(116748859..116760725)	11867	5.04246	4.95016	5.44904	5.21228	5.29967	5.28233	5.14722	0.265427	5.26476	0.0462711	FCF1	FCF1 rRNA-processing protein	Other	other	Common_Between_RNAseq_&_Microarray
G11253	Arel1	6	116893001..116917829	24829	4.2863	4.35054	4.14799	4.57924	4.56557	4.58346	4.26161	0.103507	4.57609	0.00934889	AREL1	apoptosis resistant E3 ubiquitin protein ligase 1	Cytoplasm	enzyme	Common_Between_RNAseq_&_Microarray
G11255	Isca2	6	complement(117058978..117060567)	1590	5.80774	5.80193	5.87172	5.6792	5.97922	5.96855	5.82713	0.0387245	5.87566	0.170222	ISCA2	iron-sulfur cluster assembly 2	Cytoplasm	other	RNAseq_Specific
G11256	Npc2	6	117060860..117081692	20833	7.31364	7.37052	7.33497	7.19318	7.32025	7.36498	7.33971	0.0287336	7.29281	0.089127	NPC2	Niemann-Pick disease, type C2	Extracellular Space	other	Common_Between_RNAseq_&_Microarray
G1126	Lrp3	1	complement(92579059..92593301)	14243	4.84822	4.6804	4.61794	4.51607	4.34311	4.4801	4.71552	0.119087	4.44643	0.091262	LRP3	low density lipoprotein receptor-related protein 3	Plasma Membrane	transmembrane receptor	Common_Between_RNAseq_&_Microarray
G11261	Lin52	6	complement(117298279..117378681)	80403	4.26285	4.45495	4.51513	4.42606	4.45429	4.25002	4.41098	0.131765	4.37679	0.110689	LIN52	lin-52 homolog (C. elegans)	Nucleus	other	Common_Between_RNAseq_&_Microarray
G11262	Aldh6a1	6	117379212..117399815	20604	4.51922	4.57683	4.32168	3.99467	3.8008	3.73845	4.47258	0.133819	3.84464	0.13362	ALDH6A1	aldehyde dehydrogenase 6 family, member A1	Cytoplasm	enzyme	Common_Between_RNAseq_&_Microarray
G11263	Ccdc176	6	complement(117396790..117422542)	25753	4.86042	4.90398	5.18874	4.85868	5.07948	4.97726	4.98438	0.178315	4.97181	0.110504	CCDC176	coiled-coil domain containing 176	Other	other	RNAseq_Specific
G11264	Entpd5	6	117425815..117455726	29912	3.25001	3.14391	3.16253	4.18095	3.96865	3.99198	3.18549	0.0566521	4.04719	0.116425	ENTPD5	ectonucleoside triphosphate diphosphohydrolase 5	Cytoplasm	enzyme	Common_Between_RNAseq_&_Microarray
G11266	Coq6	6	complement(117458618..117469955)	11338	5.00654	4.99364	5.12445	4.98344	5.07991	4.99635	5.04154	0.0720901	5.0199	0.0523686	COQ6	coenzyme Q6 monooxygenase	Cytoplasm	enzyme	Common_Between_RNAseq_&_Microarray
G11267	FAM161B	6	117470211..117485334	15124	4.03971	3.94638	4.09785	3.72486	3.74277	3.54071	4.02798	0.0764112	3.66945	0.111847	FAM161B	family with sequence similarity 161, member B	Other	other	RNAseq_Specific
G11268	Zfp410	6	complement(117487588..117513541)	25954	3.96728	3.98604	3.95105	3.96126	4.04981	3.97186	3.96812	0.0175083	3.99431	0.0483525	ZNF410	zinc finger protein 410	Nucleus	other	Common_Between_RNAseq_&_Microarray
G11269	Ptgr2	6	complement(117514754..117546551)	31798	4.16738	4.15367	4.1488	3.96865	4.11046	3.89201	4.15662	0.00963201	3.99037	0.11083	PTGR2	prostaglandin reductase 2	Cytoplasm	enzyme	Common_Between_RNAseq_&_Microarray
G11274	Dnal1	6	complement(117911562..117933171)	21610	3.51451	3.55303	3.35525	3.8147	3.42076	3.21235	3.47426	0.104853	3.48261	0.305899	DNAL1	dynein, axonemal, light chain 1	Other	other	Common_Between_RNAseq_&_Microarray
G1128	Gpatch1	1	complement(92659066..92707992)	48927	3.21778	3.28297	3.20926	3.17855	3.33678	3.34532	3.23667	0.0403237	3.28689	0.0939157	GPATCH1	G patch domain containing 1	Extracellular Space	other	Common_Between_RNAseq_&_Microarray
G11286	Numb	6	118218525..118262951	44427	3.54258	3.5966	3.47753	3.715	3.56587	3.66013	3.5389	0.0596219	3.647	0.075428	NUMB	numb homolog (Drosophila)	Plasma Membrane	other	Common_Between_RNAseq_&_Microarray
G11288	Psen1	6	complement(118325068..118373047)	47980	3.77681	3.73301	3.68056	3.82494	3.94871	3.81623	3.73013	0.0481928	3.86329	0.0741	PSEN1	presenilin 1	Plasma Membrane	peptidase	RNAseq_Specific
G11289	ENSRNOG00000002874	6	complement(118377074..118391069)	13996	5.61706	5.49136	5.79753	5.73023	5.62556	5.57909	5.63532	0.153896	5.64496	0.0774152	Rbm25	RNA binding motif protein 25	Other	other	RNAseq_Specific
G11290	Zfyve1	6	118461006..118509830	48825	3.33249	3.35384	3.27706	3	3.04854	3	3.32113	0.039633	3.01618	0.0280233	ZFYVE1	zinc finger, FYVE domain containing 1	Cytoplasm	other	RNAseq_Specific
G11291	Dcaf4	6	complement(118513786..118539582)	25797	4.08724	4.11962	4.08297	3.63601	3.87345	3.629	4.09661	0.0200387	3.71282	0.139153	DCAF4	DDB1 and CUL4 associated factor 4	Other	other	RNAseq_Specific
G11292	Jdp2	6	118780172..118988281	208110	4.47164	4.4143	4.45101	4.73633	4.62733	4.83845	4.44565	0.0290444	4.73404	0.105575	JDP2	Jun dimerization protein 2	Nucleus	transcription regulator	RNAseq_Specific
G11295	RGD1310769	6	complement(118991548..119000513)	8966	3.18964	3.20614	3.41061	3.04157	3.41197	3.30576	3.2688	0.123092	3.2531	0.190729	C14orf1	chromosome 14 open reading frame 1	Cytoplasm	other	Common_Between_RNAseq_&_Microarray
G11296	RGD1563583	6	119073228..119102361	29134	3.33249	3.52828	3.3686	3.13982	3.28518	3.14145	3.40979	0.104195	3.18882	0.0834596
G11297	ENSRNOG00000048695	6	119175318..119187901	12584	3.22708	3.14145	3.29991	3	3.13898	3.07452	3.22281	0.0793148	3.07117	0.069553
G11298	Tgfb3	6	complement(119222052..119243828)	21777	3	3	3	3.11005	3.0633	3.31303	3	0	3.16213	0.132764	TGFB3	transforming growth factor, beta 3	Extracellular Space	growth factor	Common_Between_RNAseq_&_Microarray
G11299	Ift43	6	119247640..119323931	76292	3.70619	3.97415	4.18175	3.9084	4.04453	4.00414	3.95403	0.238419	3.98569	0.0699176	IFT43	intraflagellar transport 43 homolog (Chlamydomonas)	Other	other	Common_Between_RNAseq_&_Microarray
G11301	Gpatch2l	6	119400117..119527025	126909	3	3	3	3	3	3.35666	3	0	3.11889	0.205918	GPATCH2L	G patch domain containing 2-like	Other	other	RNAseq_Specific
G11306	Vash1	6	119922878..119934446	11569	3.16898	3.35102	3	3.52332	3.24698	3.27557	3.17333	0.175548	3.34862	0.151968	VASH1	vasohibin 1	Extracellular Space	other	Common_Between_RNAseq_&_Microarray
G11309	Irf2bpl	6	complement(120193879..120196227)	2349	4.86363	4.86862	4.59006	4.88699	4.80044	4.8015	4.77411	0.159404	4.82964	0.0496661	IRF2BPL	interferon regulatory factor 2 binding protein-like	Nucleus	other	Common_Between_RNAseq_&_Microarray
G11310	RGD1309492	6	120260096..120281691	21596	3.80441	3.71827	3.64524	4.04278	3.87886	3.85966	3.72264	0.0796757	3.9271	0.100642	CIPC	CLOCK-interacting pacemaker	Other	other	Common_Between_RNAseq_&_Microarray
G11312	Zdhhc22	6	complement(120299219..120306482)	7264	3.02307	3	3	3	3	3	3.00769	0.01332	3	0	ZDHHC22	zinc finger, DHHC-type containing 22	Other	other	RNAseq_Specific
G11313	Tmem63c	6	120339455..120404855	65401	4.39758	4.49391	4.18929	4.69049	4.58196	4.63693	4.36026	0.155701	4.63646	0.0542678	TMEM63C	transmembrane protein 63C	Other	other	RNAseq_Specific
G11314	Ngb	6	complement(120412242..120417308)	5067	3.33465	3.65899	3.07878	3	3	3	3.35747	0.290776	3	0	NGB	neuroglobin	Cytoplasm	transporter	RNAseq_Specific
G11315	Pomt2	6	complement(120423138..120461156)	38019	4.02073	4.03002	4.04981	3.85818	3.86215	3.90024	4.03352	0.0148504	3.87352	0.0232214	POMT2	protein-O-mannosyltransferase 2	Cytoplasm	enzyme	RNAseq_Specific
G11316	Gstz1	6	120460963..120471409	10447	4.57924	4.57349	4.7282	4.6002	4.64299	4.64155	4.62697	0.087709	4.62825	0.0242995	Gstz1	glutathione S-transferase zeta 1	Cytoplasm	enzyme	Common_Between_RNAseq_&_Microarray
G1132	Cep89	1	92791362..92833455	42094	3.51577	3.54503	3.7341	3.92084	3.99829	3.83149	3.5983	0.118509	3.91687	0.0834713	CEP89	centrosomal protein 89kDa	Cytoplasm	other	RNAseq_Specific
G11320	Vipas39	6	complement(120553710..120577928)	24219	5.17064	5.14679	5.16704	4.97266	5.08993	4.99794	5.16149	0.0128536	5.02018	0.0617151	Vipas39	VPS33B interacting protein, apical-basolateral polarity regulator, spe-39 homolog	Cytoplasm	other	Common_Between_RNAseq_&_Microarray
G11321	Ahsa1	6	120578428..120586235	7808	6.68635	6.77781	6.77274	6.82184	6.87435	6.83439	6.74564	0.0514027	6.84353	0.0274222	Ahsa1	AHA1, activator of heat shock 90kDa protein ATPase homolog 1 (yeast)	Cytoplasm	other	Common_Between_RNAseq_&_Microarray
G11323	Sptlc2	6	complement(120620976..120699229)	78254	3.42546	3.32389	3.46779	3.69234	3.59901	3.78992	3.40572	0.0739521	3.69376	0.0954639	SPTLC2	serine palmitoyltransferase, long chain base subunit 2	Cytoplasm	enzyme	RNAseq_Specific
G11324	Alkbh1	6	complement(120737713..120757491)	19779	3.25683	3.08732	3.12585	3.36999	3.25001	3.24775	3.15667	0.0888604	3.28925	0.069933	ALKBH1	alkB, alkylation repair homolog 1 (E. coli)	Cytoplasm	enzyme	RNAseq_Specific
G11326	Slirp	6	120757482..120766753	9272	3.30137	3.37207	3.73301	3.31232	3.76091	3.52703	3.46882	0.231512	3.53342	0.224362	SLIRP	SRA stem-loop interacting RNA binding protein	Cytoplasm	other	Common_Between_RNAseq_&_Microarray
G11327	Snw1	6	complement(120764419..120788496)	24078	4.42338	4.46673	4.6008	4.8225	4.8087	4.95835	4.49697	0.0924938	4.86318	0.0827051	SNW1	SNW domain containing 1	Nucleus	transcription regulator	RNAseq_Specific
G11330	Adck1	6	120923362..121019893	96532	3	3	3.00521	3	3	3.07106	3.00174	0.00300852	3.02369	0.0410275	ADCK1	aarF domain containing kinase 1	Cytoplasm	kinase	RNAseq_Specific
G11347	Gtf2a1	6	complement(124579899..124607638)	27740	3.1991	3.1999	3	3.23554	3.06503	3.17934	3.133	0.115181	3.15997	0.0868936	GTF2A1	general transcription factor IIA, 1, 19/37kDa	Cytoplasm	transcription regulator	RNAseq_Specific
G11349	Sel1l	6	complement(124826559..124868279)	41721	4.33743	4.52081	4.10165	4.49487	4.35054	4.44739	4.31996	0.210123	4.43093	0.0735612	SEL1L	sel-1 suppressor of lin-12-like (C. elegans)	Cytoplasm	other	RNAseq_Specific
G1136	Nudt19	1	complement(92948067..92959663)	11597	3.48524	3.56099	3.77945	3.86904	4.13695	4.14391	3.60856	0.152766	4.04997	0.156726	NUDT19	nudix (nucleoside diphosphate linked moiety X)-type motif 19	Cytoplasm	other	Common_Between_RNAseq_&_Microarray
G11364	Galc	6	complement(131392303..131454533)	62231	3	3	3	3.00433	3	3.06762	3	0	3.02398	0.0378555	GALC	galactosylceramidase	Cytoplasm	enzyme	Common_Between_RNAseq_&_Microarray
G11367	Spata7	6	131817567..131862859	45293	4.55217	4.42707	4.74308	4.05632	4.37513	4.12667	4.57411	0.159139	4.18604	0.167491	SPATA7	spermatogenesis associated 7	Other	other	Common_Between_RNAseq_&_Microarray
G11370	Zc3h14	6	131951525..131988793	37269	4.93468	4.95671	4.99364	5.0405	4.98231	4.92854	4.96168	0.0297917	4.98378	0.0559986	ZC3H14	zinc finger CCCH-type containing 14	Nucleus	other	Common_Between_RNAseq_&_Microarray
G11371	Eml5	6	complement(131991613..132118730)	127118	3.54627	3.55486	3.58401	3.23554	3.23785	3.01059	3.56171	0.0197809	3.16133	0.130547	EML5	echinoderm microtubule associated protein like 5	Other	other	RNAseq_Specific
G11372	Ttc8	6	132140830..132207106	66277	4.57774	4.52895	4.7724	3.84011	4.08809	3.8111	4.62636	0.128806	3.9131	0.152237	TTC8	tetratricopeptide repeat domain 8	Cytoplasm	other	RNAseq_Specific
G1138	Ankrd27	1	92990234..93089746	99513	3.30576	3.17934	3.25455	3.18726	3.11172	3.13735	3.24655	0.0635883	3.14544	0.0384149	ANKRD27	ankyrin repeat domain 27 (VPS9 domain)	Cytoplasm	other	RNAseq_Specific
G11380	Psmc1	6	133350565..133362938	12374	7.05088	6.912	6.96644	7.05187	7.18827	7.18396	6.97644	0.0699762	7.14137	0.0775404	PSMC1	proteasome (prosome, macropain) 26S subunit, ATPase, 1	Nucleus	peptidase	Common_Between_RNAseq_&_Microarray
G11382	Calm1	6	133444274..133454391	10118	9.08762	9.11731	8.99451	9.48997	9.53831	9.39053	9.06648	0.0640703	9.47293	0.0753504	Calm1 (includes others)	calmodulin 1	Nucleus	other	Common_Between_RNAseq_&_Microarray
G11383	Ttc7b	6	complement(133541064..133653972)	112909	5.41103	5.44756	5.30844	5.20116	5.23333	5.27023	5.38901	0.0721231	5.23491	0.0345611	Ttc7b	tetratricopeptide repeat domain 7B	Other	other	Common_Between_RNAseq_&_Microarray
G11384	Rps6ka5	6	complement(133782184..133959292)	177109	4.07658	4.05153	4.11296	3.37902	3.39627	3.01147	4.08036	0.0308888	3.26225	0.217355	Rps6ka5	ribosomal protein S6 kinase, polypeptide 5	Other	kinase	Common_Between_RNAseq_&_Microarray
G11386	RGD1311756	6	134008151..134091103	82953	3.15771	3.3644	3.31087	3.64583	3.49356	3.45863	3.27766	0.107271	3.53267	0.0995383	C14orf159	chromosome 14 open reading frame 159	Cytoplasm	other	Common_Between_RNAseq_&_Microarray
G11389	Smek1	6	complement(134261555..134302289)	40735	4.42203	4.39138	4.49134	4.6713	4.52895	4.48073	4.43492	0.0512118	4.56033	0.0990852	Smek1	SMEK homolog 1, suppressor of mek1 (Dictyostelium)	Other	other	Common_Between_RNAseq_&_Microarray
G11391	Gpr68	6	complement(134532212..134533339)	1128	3	3	3	3.06762	3	3	3	0	3.02254	0.0390426	GPR68	G protein-coupled receptor 68	Plasma Membrane	G-protein coupled receptor	Common_Between_RNAseq_&_Microarray
G11396	ENSRNOG00000005718	6	135075500..135076578	1079	3.35948	3.21235	3.4335	3.58641	3.89201	3.78209	3.33511	0.112567	3.7535	0.154792	LOC100911956	protein LLP homolog	Other	other	RNAseq_Specific
G11397	Cpsf2	6	135081852..135109466	27615	3.65899	3.79201	3.67547	3.77313	3.75291	3.76679	3.70882	0.0725114	3.76428	0.0103401	CPSF2	cleavage and polyadenylation specific factor 2, 100kDa	Nucleus	other	Common_Between_RNAseq_&_Microarray
G11400	Lgmn	6	complement(135492944..135518919)	25976	7.01428	7.07	6.95932	7.178	7.17889	7.2892	7.01453	0.0553393	7.21536	0.0639458	LGMN	legumain	Cytoplasm	peptidase	Common_Between_RNAseq_&_Microarray
G11401	Golga5	6	135563809..135589329	25521	4.0055	4.05848	4.08639	4.20933	4.20933	4.10667	4.05012	0.0410882	4.17511	0.0592698	GOLGA5	golgin A5	Cytoplasm	kinase	Common_Between_RNAseq_&_Microarray
G11403	Chga	6	135645155..135656039	10885	6.98226	6.97006	7.10088	6.78574	6.88111	6.69606	7.01773	0.0722663	6.78764	0.0925389	Chga	chromogranin A (parathyroid secretory protein 1)	Cytoplasm	other	Common_Between_RNAseq_&_Microarray
G11404	Itpk1	6	complement(135660943..135790645)	129703	4.3335	4.16134	3.88959	4.3242	4.10585	4.36253	4.12814	0.22381	4.26419	0.138461	ITPK1	inositol-tetrakisphosphate 1-kinase	Cytoplasm	kinase	Common_Between_RNAseq_&_Microarray
G11406	Moap1	6	complement(135826374..135828304)	1931	6.83559	6.92467	6.88325	6.81243	6.8062	6.72369	6.88117	0.0445731	6.78077	0.0495311	MOAP1	modulator of apoptosis 1	Cytoplasm	other	RNAseq_Specific
G11407	Tmem251	6	135828702..135829916	1215	3.2651	3.37832	3.65158	4.04321	4.00368	4.24128	3.43167	0.198686	4.09606	0.127313	TMEM251	transmembrane protein 251	Other	other	RNAseq_Specific
G11408	ENSRNOG00000046085	6	complement(135837722..135842402)	4681	3.85318	4.00324	3.95895	3.84213	4.04321	4.00727	3.93846	0.0771027	3.9642	0.107238	C14orf142	chromosome 14 open reading frame 142	Other	other	Common_Between_RNAseq_&_Microarray
G11409	Ubr7	6	135842580..135862537	19958	3.71554	3.75823	3.79559	3.77102	3.79714	3.70894	3.75646	0.0400545	3.75903	0.0453066	UBR7	ubiquitin protein ligase E3 component n-recognin 7 (putative)	Other	enzyme	Common_Between_RNAseq_&_Microarray
G11410	Btbd7	6	complement(135867662..135916888)	49227	3.24546	3.16253	3	3	3.21235	3.05205	3.13599	0.12486	3.08814	0.11068	BTBD7	BTB (POZ) domain containing 7	Other	other	RNAseq_Specific
G11412	Unc79	6	136066167..136268033	201867	3.86953	3.78677	3.89831	3.75719	3.69345	3.66752	3.85153	0.0579056	3.70605	0.0461456	UNC79	unc-79 homolog (C. elegans)	Extracellular Space	other	Common_Between_RNAseq_&_Microarray
G11418	Ddx24	6	complement(136522732..136539893)	17162	5.9331	5.88935	5.97579	5.95396	5.86195	5.97108	5.93275	0.043219	5.929	0.0586907	DDX24	DEAD (Asp-Glu-Ala-Asp) box helicase 24	Nucleus	enzyme	Common_Between_RNAseq_&_Microarray
G11419	Ifi27	6	136548421..136554959	6539	6.41827	5.9493	5.91612	6.08947	6.35974	6.27184	6.09456	0.280828	6.24035	0.137858	IFI27	interferon, alpha-inducible protein 27	Cytoplasm	other	Common_Between_RNAseq_&_Microarray
G11420	Ifi27l2b	6	complement(136556836..136558324)	1489	3.1488	3	3.24318	3.8111	3.87198	4.40239	3.13066	0.122602	4.02849	0.325235	Ifi27l2b	interferon, alpha-inducible protein 27 like 2B	Other	other	Common_Between_RNAseq_&_Microarray
G11434	ENSRNOG00000037743	6	complement(137083644..137097524)	13881	3	3	3	3	3	3.03455	3	0	3.01152	0.0199464	Serpina3a	serine (or cysteine) peptidase inhibitor, clade A, member 3A	Extracellular Space	other	RNAseq_Specific
G1144	Zfp536	1	complement(94800255..95054443)	254189	3.08732	3.25911	3.09915	3.15205	3	3.14798	3.14853	0.0959481	3.10001	0.0866349	ZNF536	zinc finger protein 536	Other	other	RNAseq_Specific
G11440	ENSRNOG00000029253	6	complement(137303495..137326682)	23188	3.15205	3	3	3.11756	3.00164	3	3.05068	0.0877872	3.03973	0.0674031	LOC690435	hypothetical protein LOC690435	Other	other	RNAseq_Specific
G11444	Syne3	6	complement(137837828..137913141)	75314	3	3	3	3	3	3.46584	3	0	3.15528	0.268954	SYNE3	spectrin repeat containing, nuclear envelope family member 3	Nucleus	other	RNAseq_Specific
G11445	Rpl6	6	137935468..137936399	932	6.22081	6.39814	6.59276	6.52669	6.84384	6.56514	6.4039	0.186038	6.64522	0.173078	RPL6	ribosomal protein L6	Cytoplasm	other	Common_Between_RNAseq_&_Microarray
G11446	Glrx5	6	137947875..137957960	10086	4.04981	4.20424	4.1312	3.7915	4.12996	4.01267	4.12841	0.0772537	3.97804	0.171867	GLRX5	glutaredoxin 5	Cytoplasm	other	Common_Between_RNAseq_&_Microarray
G1145	Uri1	1	complement(95435846..95493474)	57629	4.28408	4.21981	4.31374	4.16536	4.20933	4.15529	4.27254	0.0480149	4.17666	0.0287361	URI1	URI1, prefoldin-like chaperone	Nucleus	transcription regulator	Common_Between_RNAseq_&_Microarray
G11454	Atg2b	6	complement(138645992..138712125)	66134	3.57133	3.33249	3.21702	3.53391	3.363	3.52828	3.37361	0.180701	3.47507	0.0970949
G11455	Gskip	6	138712664..138728642	15979	4.20541	4.38484	4.4126	4.76207	4.76392	4.83393	4.33428	0.112469	4.78664	0.0409636	GSKIP	GSK3B interacting protein	Other	other	Common_Between_RNAseq_&_Microarray
G11457	Papola	6	138807510..138859620	52111	5.21228	5.29894	5.36243	5.57954	5.53947	5.53792	5.29122	0.0753766	5.55231	0.0235974	PAPOLA	poly(A) polymerase alpha	Nucleus	enzyme	Common_Between_RNAseq_&_Microarray
G11458	Vrk1	6	139031649..139098523	66875	3	3	3.00521	3	3	3	3.00174	0.00300852	3	0	VRK1	vaccinia related kinase 1	Nucleus	kinase	RNAseq_Specific
G11461	Setd3	6	complement(141193723..141246255)	52533	6.44907	6.48018	6.43471	6.52239	6.41024	6.39754	6.45465	0.0232432	6.44339	0.0687072	Setd3	SET domain containing 3	Other	enzyme	Common_Between_RNAseq_&_Microarray
G11462	Ccnk	6	141261013..141283937	22925	4.38622	4.40646	4.44407	4.55094	4.65563	4.62001	4.41225	0.0293564	4.60886	0.0532298	CCNK	cyclin K	Nucleus	kinase	Common_Between_RNAseq_&_Microarray
G11464	Cyp46a1	6	141416875..141443679	26805	4.72765	4.57196	4.5355	4.31157	4.22211	3.99377	4.61171	0.102055	4.17582	0.16388	CYP46A1	cytochrome P450, family 46, subfamily A, polypeptide 1	Cytoplasm	enzyme	Common_Between_RNAseq_&_Microarray
G11465	Eml1	6	141509418..141619631	110214	4.19757	4.1092	3.8008	3.83709	3.7673	3.63833	4.03586	0.208305	3.74757	0.100839	EML1	echinoderm microtubule associated protein like 1	Cytoplasm	other	Common_Between_RNAseq_&_Microarray
G11466	Evl	6	141721470..141760317	38848	7.13906	6.97323	7.07899	6.75047	6.77525	6.69571	7.06376	0.0839578	6.74048	0.0406981	EVL	Enah/Vasp-like	Cytoplasm	other	Common_Between_RNAseq_&_Microarray
G1147	1600014C10Rik	1	95670340..95676490	6151	4.60584	4.78746	4.25304	3.89057	3.84011	3.96126	4.54878	0.271738	3.89731	0.0608537
G11470	Yy1	6	141872657..141896924	24268	4.43677	4.41899	4.44407	4.23939	4.25457	4.15974	4.43328	0.0129001	4.2179	0.0509385	YY1	YY1 transcription factor	Nucleus	transcription regulator	Common_Between_RNAseq_&_Microarray
G11474	Wars	6	complement(141941104..141972286)	31183	4.95508	4.75409	4.82885	5.83719	5.61324	5.93156	4.846	0.101587	5.794	0.1635	WARS	tryptophanyl-tRNA synthetase	Cytoplasm	enzyme	Common_Between_RNAseq_&_Microarray
G11475	Wdr25	6	141975870..142103153	127284	3	3	3	3	3	3.01417	3	0	3.00472	0.00818021	Wdr25	WD repeat domain 25	Other	other	RNAseq_Specific
G11476	Begain	6	complement(142107881..142129457)	21577	5.88935	5.86071	6.12205	5.87356	5.63095	5.69181	5.95737	0.143334	5.73211	0.126226	BEGAIN	brain-enriched guanylate kinase-associated	Nucleus	other	RNAseq_Specific
G11477	Dlk1	6	142742285..142749166	6882	5.01258	5.39639	4.95251	6.98431	7.22105	7.70725	5.12049	0.240814	7.3042	0.368574	DLK1	delta-like 1 homolog (Drosophila)	Extracellular Space	other	Common_Between_RNAseq_&_Microarray
G11478	ENSRNOG00000041744	6	142824619..142824698	80	4.66076	4.24321	5.02683	4.15853	4.64617	3.78314	4.6436	0.392092	4.19595	0.432731	RGD1566401	similar to GTL2, imprinted maternally expressed untranslated	Other	other	Common_Between_RNAseq_&_Microarray
G11479	Mir770	6	142845041..142845134	94	3	3	3.15205	3	3	3	3.05068	0.0877872	3	0	mir-770	microRNA 770	Cytoplasm	microRNA	RNAseq_Specific
G11487	rno-mir-3543	6	complement(142873331..142879024)	5694	3	3	3	3.57012	3.38938	3.91415	3	0	3.62455	0.266589
G1150	Pop4	1	complement(95761043..95769376)	8334	4.90276	4.90495	5.12259	4.98368	5.23563	5.19979	4.97677	0.126293	5.1397	0.136305	POP4	processing of precursor 4, ribonuclease P/MRP subunit (S. cerevisiae)	Nucleus	enzyme	Common_Between_RNAseq_&_Microarray
G1153	UQCRB	1	95819089..95819563	475	6.23496	6.3629	6.52309	6.18289	6.41498	6.37007	6.37365	0.144366	6.32264	0.123096	UQCRB	ubiquinol-cytochrome c reductase binding protein	Cytoplasm	enzyme	RNAseq_Specific
G11539	Ppp2r5c	6	143982521..144075381	92861	5.81365	5.86839	5.7778	6.02967	5.98402	5.83352	5.81995	0.0456196	5.94907	0.102639	Ppp2r5c	protein phosphatase 2, regulatory subunit B', gamma	Nucleus	other	Common_Between_RNAseq_&_Microarray
G11540	Dync1h1	6	144094996..144159980	64985	6.57259	6.52019	6.41894	6.33217	6.15916	6.18854	6.50391	0.0781036	6.22662	0.0925779	DYNC1H1	dynein, cytoplasmic 1, heavy chain 1	Cytoplasm	peptidase	Common_Between_RNAseq_&_Microarray
G11542	Hsp90aa1	6	complement(144182014..144187540)	5527	9.92527	9.952	9.84787	10.0456	9.7915	9.7307	9.90838	0.054083	9.85595	0.167069	HSP90AA1	heat shock protein 90kDa alpha (cytosolic), class A member 1	Cytoplasm	enzyme	Common_Between_RNAseq_&_Microarray
G11544	Apopt1	6	complement(144205803..144230967)	25165	5.15249	5.17762	5.21441	4.82327	5.12714	5.08609	5.18151	0.0311418	5.01217	0.164876	APOPT1	apoptogenic 1, mitochondrial	Cytoplasm	other	Common_Between_RNAseq_&_Microarray
G11545	Bag5	6	144231051..144234393	3343	5.11076	5.14679	5.12941	5.16523	5.23678	5.18658	5.12899	0.018019	5.1962	0.036734	BAG5	BCL2-associated athanogene 5	Cytoplasm	other	Common_Between_RNAseq_&_Microarray
G11546	Trmt61a	6	complement(144259958..144265948)	5991	3.96266	3.97831	3.79714	4.46284	4.43544	4.44143	3.9127	0.100386	4.44657	0.0144031	TRMT61A	tRNA methyltransferase 61 homolog A (S. cerevisiae)	Other	enzyme	Common_Between_RNAseq_&_Microarray
G11547	Ckb	6	144270887..144273773	2887	9.24819	9.18628	9.24819	9.11991	9.10329	9.09417	9.22756	0.0357443	9.10579	0.0130506	CKB	creatine kinase, brain	Cytoplasm	kinase	Common_Between_RNAseq_&_Microarray
G11548	Mark3	6	complement(144287323..144374797)	87475	5.11679	5.1327	5.3373	5.15673	5.19368	5.18835	5.1956	0.122975	5.17959	0.0199688	MARK3	MAP/microtubule affinity-regulating kinase 3	Cytoplasm	kinase	Common_Between_RNAseq_&_Microarray
G11549	Eif5	6	complement(144405139..144412325)	7187	7.22332	7.34661	7.20751	7.63484	7.51002	7.43302	7.25914	0.0761556	7.52596	0.101848	EIF5	eukaryotic translation initiation factor 5	Cytoplasm	translation regulator	Common_Between_RNAseq_&_Microarray
G11554	Cdc42bpb	6	144585640..144667686	82047	4.47815	4.43911	4.33778	4.28408	4.19482	4.28556	4.41834	0.0724511	4.25482	0.0519635	CDC42BPB	CDC42 binding protein kinase beta (DMPK-like)	Cytoplasm	kinase	Common_Between_RNAseq_&_Microarray
G11556	Traf3	6	complement(144695911..144803845)	107935	3.31232	3.19202	3.26883	3.12254	3	3	3.25773	0.0609124	3.04085	0.0707461	TRAF3	TNF receptor-associated factor 3	Cytoplasm	enzyme	Common_Between_RNAseq_&_Microarray
G11560	Tecpr2	6	complement(145009992..145099887)	89896	3	3	3.09409	3	3	3	3.03136	0.054325	3	0	TECPR2	tectonin beta-propeller repeat containing 2	Other	other	RNAseq_Specific
G11561	Cinp	6	145109734..145123627	13894	4.92546	4.95369	4.93611	5.51064	5.58571	5.5821	4.93842	0.014257	5.55949	0.0423382	CINP	cyclin-dependent kinase 2 interacting protein	Nucleus	other	Common_Between_RNAseq_&_Microarray
G11563	Mok	6	145154362..145185192	30831	3.72922	3.55303	3.715	3.03807	3.08646	3	3.66575	0.0978761	3.04151	0.0433315	MOK	MOK protein kinase	Plasma Membrane	kinase	RNAseq_Specific
G11564	Wdr20	6	complement(145187523..145256218)	68696	3.38938	3.40857	3.54937	3.24396	3.2977	3.17696	3.4491	0.0873584	3.23954	0.0604896	WDR20	WD repeat domain 20	Other	other	RNAseq_Specific
G11567	Klc1	6	145338402..145370499	32098	8.83127	8.7942	8.67882	9.11731	8.91285	8.89411	8.7681	0.0795032	8.97476	0.12381	KLC1	kinesin light chain 1	Cytoplasm	other	Common_Between_RNAseq_&_Microarray
G11569	Zfyve21	6	145388967..145408787	19821	4.94526	5.12652	5.04115	4.60109	4.74119	4.56983	5.03765	0.09068	4.63737	0.091261	ZFYVE21	zinc finger, FYVE domain containing 21	Other	other	Common_Between_RNAseq_&_Microarray
G11570	Ppp1r13b	6	complement(145405635..145444597)	38963	3.48524	3.57621	3.34605	3.37347	3.35243	3.38732	3.46916	0.115919	3.37107	0.0175687	PPP1R13B	protein phosphatase 1, regulatory subunit 13B	Cytoplasm	phosphatase	Common_Between_RNAseq_&_Microarray
G11573	MP68	6	complement(145534566..145536613)	2048	3.64984	3.71937	4.09489	3.58342	4.33564	3.94638	3.82137	0.239413	3.95515	0.376184
G11580	Tmem179	6	complement(146081901..146092800)	10900	6.81243	6.5675	6.34038	6.70148	6.70377	6.80303	6.57344	0.236081	6.73609	0.0579837	TMEM179	transmembrane protein 179	Other	other	Common_Between_RNAseq_&_Microarray
G11581	RGD1308350	6	146172025..146187666	15642	3.3887	3	3.31232	3.99693	3.90936	4.22289	3.23367	0.205939	4.04306	0.161777
G11584	Akt1	6	complement(146226687..146243773)	17087	6.32292	6.3194	6.00528	6.20408	5.96139	6.1536	6.21587	0.182379	6.10636	0.128058	AKT1	v-akt murine thymoma viral oncogene homolog 1	Cytoplasm	kinase	Common_Between_RNAseq_&_Microarray
G11586	Cep170b	6	146294896..146315899	21004	4.60613	4.5355	4.18533	4.88042	4.6713	4.84924	4.44232	0.225344	4.80032	0.112812	CEP170B	centrosomal protein 170B	Other	other	RNAseq_Specific
G11587	Pld4	6	146329774..146337292	7519	3.08049	3.23016	3.25834	3	3	3	3.18966	0.0955931	3	0	PLD4	phospholipase D family, member 4	Extracellular Space	enzyme	Common_Between_RNAseq_&_Microarray
G1159	Zfp939	1	96489118..96500809	11692	4.12872	4.0019	3.58222	3.66357	3.64239	3.4295	3.90428	0.28603	3.57849	0.12946	Zfp939	zinc finger protein 939	Other	other	RNAseq_Specific
G11590	RGD1307315	6	146389788..146396583	6796	3.44744	3.26883	3.51007	3.28594	3.27332	3.25381	3.40878	0.125179	3.27102	0.016185	C14orf79	chromosome 14 open reading frame 79	Other	other	RNAseq_Specific
G11594	Jag2	6	complement(146708461..146729480)	21020	5.10239	5.15067	4.86813	5.3188	5.08312	5.36243	5.04039	0.15113	5.25478	0.15026	JAG2	jagged 2	Extracellular Space	growth factor	RNAseq_Specific
G11595	Nudt14	6	complement(146734337..146741325)	6989	3.51069	3.13161	3.27706	3.28076	3.53826	3.65099	3.30645	0.191245	3.49	0.189774	NUDT14	nudix (nucleoside diphosphate linked moiety X)-type motif 14	Cytoplasm	phosphatase	RNAseq_Specific
G11596	Brf1	6	complement(146761304..146804485)	43182	5.21149	5.19189	5.30515	5.08312	5.12156	5.14068	5.23618	0.06053	5.11512	0.0293152	BRF1	BRF1, RNA polymerase III transcription initiation factor 90 kDa subunit	Nucleus	transcription regulator	Common_Between_RNAseq_&_Microarray
G11597	Btbd6	6	146782164..146784616	2453	3.61906	3.70289	3.47817	3.56831	3.5044	3.46649	3.60004	0.113563	3.51306	0.0514611	BTBD6	BTB (POZ) domain containing 6	Other	other	Common_Between_RNAseq_&_Microarray
G11598	Pacs2	6	146820376..146881865	61490	4.3285	4.21825	4.03793	4.37966	4.07785	4.22442	4.19489	0.146684	4.22731	0.150922	PACS2	phosphofurin acidic cluster sorting protein 2	Cytoplasm	other	Common_Between_RNAseq_&_Microarray
G11600	Mta1	6	146918907..146944409	25503	4.85917	4.75224	4.85373	4.48523	4.47425	4.48684	4.82171	0.0602286	4.48211	0.00685505	MTA1	metastasis associated 1	Nucleus	transcription regulator	RNAseq_Specific
G11601	Crip2	6	146947874..146952833	4960	5.76367	5.91612	5.82985	5.55765	5.70459	5.74039	5.83655	0.0764438	5.66754	0.0968359	CRIP2	cysteine-rich protein 2	Plasma Membrane	other	Common_Between_RNAseq_&_Microarray
G11602	Crip1	6	146959581..146961385	1805	4.83468	4.7447	4.80123	4.95927	4.9323	5.42907	4.79354	0.0454812	5.10688	0.279349	CRIP1	cysteine-rich protein 1 (intestinal)	Cytoplasm	other	Common_Between_RNAseq_&_Microarray
G11603	4930427A07Rik	6	146963710..146970406	6697	3	3	3	3	3	3.2837	3	0	3.09457	0.163795
G11604	Tmem121	6	146991739..146992695	957	3.13571	3.2651	3.02749	3	3.14145	3.01952	3.14276	0.118963	3.05366	0.0766568	TMEM121	transmembrane protein 121	Other	other	RNAseq_Specific
G11616	Dgcr2	6	complement(147343891..147394304)	50414	5.5812	5.47181	5.30276	5.10594	5.09078	5.00112	5.45192	0.14028	5.06595	0.0566541	DGCR2	DiGeorge syndrome critical region gene 2	Plasma Membrane	other	Common_Between_RNAseq_&_Microarray
G11709	Zfp386	6	152840231..152854884	14654	5.85537	5.66164	5.76977	5.56803	5.4146	5.18913	5.76226	0.0970838	5.39059	0.190587	ZNF519	zinc finger protein 519	Nucleus	other	Common_Between_RNAseq_&_Microarray
G11711	Wdr60	6	complement(153007323..153061842)	54520	3.59959	3.65158	3.5966	3.31596	3.26586	3.04157	3.61593	0.0309141	3.2078	0.146117	WDR60	WD repeat domain 60	Extracellular Space	other	RNAseq_Specific
G11713	Esyt2	6	153092828..153181968	89141	4.92878	4.87601	4.71592	5.07112	4.8836	4.74604	4.84024	0.110845	4.90025	0.163177	ESYT2	extended synaptotagmin-like protein 2	Other	other	Common_Between_RNAseq_&_Microarray
G11715	Ptprn2	6	153312968..154056676	743709	7.21442	7.32767	7.02139	7.1436	7.04506	6.97323	7.18783	0.154863	7.05396	0.0855327	PTPRN2	protein tyrosine phosphatase, receptor type, N polypeptide 2	Plasma Membrane	phosphatase	Common_Between_RNAseq_&_Microarray
G11717	Rapgef5	6	154462518..154541111	78594	3.25381	3.48971	3.35384	3.58342	3.59063	3.64813	3.36579	0.118403	3.60739	0.0354642	RAPGEF5	Rap guanine nucleotide exchange factor (GEF) 5	Nucleus	other	Common_Between_RNAseq_&_Microarray
G1172	ENSRNOG00000014380	1	99307780..99313940	6161	3.50375	3.5438	3.84311	3.06418	3.24623	3.21857	3.63022	0.185455	3.17632	0.0981018	LOC102555672	zinc finger protein 850-like	Other	other	RNAseq_Specific
G11729	Tmem196	6	156784820..156847093	62274	3	3	3	3.1308	3	3.15771	3	0	3.09617	0.0843648	TMEM196	transmembrane protein 196	Other	other	Common_Between_RNAseq_&_Microarray
G11735	Arl13b	7	complement(1111829..1181765)	69937	3.1991	3.1042	3.33535	3.08306	3.0771	3	3.21288	0.116193	3.05338	0.0463283	ARL13B	ADP-ribosylation factor-like 13B	Extracellular Space	other	Common_Between_RNAseq_&_Microarray
G11737	Pros1	7	1199864..1279990	80127	3	3	3	3	3	3.02042	3	0	3.00681	0.0117894	PROS1	protein S (alpha)	Extracellular Space	other	Common_Between_RNAseq_&_Microarray
G11749	Prim1	7	2416149..2430936	14788	3.96173	4.16496	4.27034	4.04058	3.74545	4.07827	4.13234	0.156869	3.95477	0.182253	Prim1	primase, DNA, polypeptide 1	Other	other	RNAseq_Specific
G11750	Naca	7	2438021..2450436	12416	5.01078	5.00112	5.20351	4.7088	4.96413	4.95039	5.0718	0.114166	4.87444	0.143615	NACA2	nascent polypeptide-associated complex alpha subunit 2	Other	transcription regulator	Common_Between_RNAseq_&_Microarray
G11751	Ptges3	7	2459082..2476400	17319	7.02139	7.0816	7.18183	7.2078	7.178	7.1705	7.09494	0.0810513	7.18543	0.0197282	PTGES3	prostaglandin E synthase 3 (cytosolic)	Cytoplasm	enzyme	Common_Between_RNAseq_&_Microarray
G11752	Atp5b	7	2484095..2490338	6244	9.84229	9.7888	9.70864	9.77018	9.77018	9.75937	9.77991	0.0672672	9.76658	0.00624101	ATP5B	ATP synthase, H+ transporting, mitochondrial F1 complex, beta polypeptide	Cytoplasm	transporter	Common_Between_RNAseq_&_Microarray
G11753	Baz2a	7	2507667..2526280	18614	3.13325	3	3.04333	3.00792	3	3	3.05886	0.0679709	3.00264	0.00457161	BAZ2A	bromodomain adjacent to zinc finger domain, 2A	Nucleus	transcription regulator	RNAseq_Specific
G11754	Rbms2	7	complement(2533526..2567969)	34444	3.90936	3.5936	4.03179	3.95428	4.15367	4.11504	3.84492	0.226089	4.07433	0.105744	RBMS2	RNA binding motif, single stranded interacting protein 2	Nucleus	other	RNAseq_Specific
G11755	Gls2	7	2584755..2600728	15974	3.93458	3.91415	4.00368	3.41197	3.59063	3.1092	3.9508	0.0469164	3.3706	0.243366	GLS2	glutaminase 2 (liver, mitochondrial)	Cytoplasm	enzyme	Common_Between_RNAseq_&_Microarray
G11756	Spryd4	7	complement(2600837..2602657)	1821	3.81007	3.76464	3.69847	4.16738	4.2636	4.37513	3.75773	0.0561174	4.2687	0.103967	SPRYD4	SPRY domain containing 4	Cytoplasm	other	RNAseq_Specific
G11761	Stat2	7	2670243..2685670	15428	3.71391	3.48393	3.61315	3.28889	3.38386	3.36789	3.60366	0.115281	3.34688	0.0508496	STAT2	signal transducer and activator of transcription 2, 113kDa	Nucleus	transcription regulator	Common_Between_RNAseq_&_Microarray
G11763	Pan2	7	2697335..2714080	16746	3.61669	3.498	3.69122	3.17298	3.2386	3.10167	3.60197	0.0974459	3.17108	0.0684894	PAN2	PAN2 poly(A) specific ribonuclease subunit homolog (S. cerevisiae)	Cytoplasm	peptidase	Common_Between_RNAseq_&_Microarray
G11764	Cnpy2	7	2716178..2720781	4604	6.68867	6.75789	6.87581	6.86666	6.80426	7.06753	6.77412	0.0946239	6.91282	0.13757	CNPY2	canopy FGF signaling regulator 2	Plasma Membrane	other	Common_Between_RNAseq_&_Microarray
G11765	Cs	7	2731053..2757519	26467	6.95932	7.00256	6.83073	7.10535	6.82368	6.89473	6.93087	0.0893802	6.94125	0.146481	CS	citrate synthase	Cytoplasm	enzyme	Common_Between_RNAseq_&_Microarray
G11766	Coq10a	7	complement(2759394..2765320)	5927	5.36506	5.34921	5.5331	4.78615	5.08418	4.92049	5.41579	0.1019	4.93027	0.149257	COQ10A	coenzyme Q10 homolog A (S. cerevisiae)	Cytoplasm	other	Common_Between_RNAseq_&_Microarray
G11767	Ankrd52	7	2774352..2788002	13651	3	3	3	3.09578	3	3	3	0	3.03193	0.0552999	ANKRD52	ankyrin repeat domain 52	Nucleus	transcription regulator	Common_Between_RNAseq_&_Microarray
G11769	Nabp2	7	complement(2798471..2804072)	5602	5.79805	5.81134	5.83124	5.73742	5.99627	6.04592	5.81354	0.0167083	5.92654	0.165654	NABP2	nucleic acid binding protein 2	Nucleus	other	Common_Between_RNAseq_&_Microarray
G1177	Vsig10l	1	complement(99538138..99544067)	5930	4.13326	3.92703	4.04496	4.21554	4.24965	4.196	4.03509	0.103471	4.2204	0.0271533	VSIG10L	V-set and immunoglobulin domain containing 10 like	Other	other	RNAseq_Specific
G11770	Rnf41	7	2809468..2831145	21678	5.60452	5.42773	5.51064	5.58511	5.60095	5.68075	5.5143	0.0884509	5.62227	0.0512565	RNF41	ring finger protein 41	Cytoplasm	enzyme	Common_Between_RNAseq_&_Microarray
G11771	Smarcc2	7	2852070..2879092	27023	6.0167	5.94392	5.70694	5.66803	5.44242	5.45465	5.88919	0.161969	5.5217	0.126874	Smarcc2	SWI/SNF related, matrix associated, actin dependent regulator of chromatin, subfamily c, member 2	Nucleus	transcription regulator	Common_Between_RNAseq_&_Microarray
G11772	Myl6	7	complement(2880878..2882604)	1727	7.26772	7.1705	7.22769	7.23856	7.33156	7.53942	7.22197	0.0488624	7.36985	0.154044	MYL6	myosin, light chain 6, alkali, smooth muscle and non-muscle	Cytoplasm	other	RNAseq_Specific
G11773	Myl6b	7	complement(2883129..2885907)	2779	5.8107	5.66391	5.80825	5.38487	5.54921	5.52073	5.76095	0.0840499	5.48494	0.0878188	Myl6b	myosin, light chain 6B, alkali, smooth muscle and non-muscle	Other	other	RNAseq_Specific
G11774	Esyt1	7	complement(2897632..2914841)	17210	4.36991	4.39481	4.2451	4.84471	4.84146	5.04792	4.33661	0.0802178	4.91136	0.118269	ESYT1	extended synaptotagmin-like protein 1	Other	other	RNAseq_Specific
G11776	Zc3h10	7	complement(2942063..2946149)	4087	3.50183	3.45667	3.48908	3.23785	3.28076	3.45272	3.48253	0.0232806	3.32378	0.113712	ZC3H10	zinc finger CCCH-type containing 10	Other	other	RNAseq_Specific
G11777	Rpl41	7	complement(2946560..2947551)	992	8.45636	8.55861	8.58287	8.26102	8.54509	8.42783	8.53261	0.0671437	8.41131	0.142756	RPL41	ribosomal protein L41	Cytoplasm	other	Common_Between_RNAseq_&_Microarray
G11778	Pa2g4	7	complement(2953212..2960679)	7468	5.70085	5.78476	5.73742	5.91349	5.93534	5.94767	5.74101	0.0420691	5.93217	0.0173092	PA2G4	proliferation-associated 2G4, 38kDa	Nucleus	transcription regulator	Common_Between_RNAseq_&_Microarray
G1178	Etfb	1	complement(99549585..99563745)	14161	6.52403	6.17383	6.51728	6.24896	6.3194	6.13453	6.40504	0.200269	6.2343	0.0933038	ETFB	electron-transfer-flavoprotein, beta polypeptide	Cytoplasm	transporter	Common_Between_RNAseq_&_Microarray
G11781	Rps26	7	complement(3025736..3027286)	1551	6.17393	5.94439	6.48131	5.87492	6.041	5.95268	6.19987	0.269398	5.9562	0.0830978	RPS26	ribosomal protein S26	Cytoplasm	other	Common_Between_RNAseq_&_Microarray
G11783	Suox	7	complement(3070930..3073497)	2568	3.73301	3.70343	3.94964	3	3.08732	3	3.79536	0.134427	3.02911	0.0504137	SUOX	sulfite oxidase	Cytoplasm	enzyme	RNAseq_Specific
G11784	Rab5b	7	complement(3077243..3095997)	18755	6.29866	6.25086	6.13062	6.07028	6.19849	6.01077	6.22671	0.0865816	6.09318	0.0959328	RAB5B	RAB5B, member RAS oncogene family	Cytoplasm	enzyme	Common_Between_RNAseq_&_Microarray
G11787	Dgka	7	complement(3116798..3142227)	25430	3.86707	3.55734	3.69234	3.32316	3.5314	3.28149	3.70558	0.155286	3.37868	0.133884	DGKA	diacylglycerol kinase, alpha 80kDa	Cytoplasm	kinase	Common_Between_RNAseq_&_Microarray
G11788	Wibg	7	3145368..3165714	20347	4.04541	3.88082	3.95941	3.7915	3.72813	3.91079	3.96188	0.0823199	3.81014	0.092744	WIBG	within bgcn homolog (Drosophila)	Nucleus	other	RNAseq_Specific
G11789	Mmp19	7	3187862..3195640	7779	4.00727	4.23939	4.41531	4.9768	4.72846	5.09944	4.22066	0.204661	4.9349	0.189004	MMP19	matrix metallopeptidase 19	Extracellular Space	peptidase	RNAseq_Specific
G11791	Dnajc14	7	3201890..3213835	11946	4.53267	4.58046	4.52738	4.77849	4.75835	4.79709	4.54683	0.0292392	4.77798	0.0193758	DNAJC14	DnaJ (Hsp40) homolog, subfamily C, member 14	Cytoplasm	other	RNAseq_Specific
G11792	Ormdl2	7	complement(3214561..3217641)	3081	5.38038	5.47327	5.4396	5.28899	5.42689	5.35134	5.43108	0.0470247	5.35574	0.0690545	ORMDL2	ORM1-like 2 (S. cerevisiae)	Cytoplasm	other	Common_Between_RNAseq_&_Microarray
G11793	Sarnp	7	3217790..3271833	54044	6.24896	6.22081	6.45942	6.12205	6.19061	5.99254	6.30973	0.130396	6.10173	0.10059	SARNP	SAP domain containing ribonucleoprotein	Nucleus	other	Common_Between_RNAseq_&_Microarray
G11794	Gdf11	7	complement(3280685..3286883)	6199	3.48137	3.50502	3.08219	3.4717	3.32892	3.45272	3.35619	0.237587	3.41778	0.0775393	GDF11	growth differentiation factor 11	Extracellular Space	growth factor	Common_Between_RNAseq_&_Microarray
G11795	Cd63	7	3304375..3305798	1424	7.61843	7.49995	7.63404	8.2507	8.3659	8.55861	7.58414	0.0733289	8.39174	0.155572	CD63	CD63 molecule	Plasma Membrane	other	Common_Between_RNAseq_&_Microarray
G11797	Bloc1s1	7	complement(3312814..3316434)	3621	4.57683	4.52738	4.74498	4.61913	4.79033	4.82327	4.6164	0.114067	4.74424	0.109597	BLOC1S1	biogenesis of lysosomal organelles complex-1, subunit 1	Cytoplasm	other	Common_Between_RNAseq_&_Microarray
G11798	Itga7	7	3325443..3354361	28919	3.15609	3.18093	3.22862	3.28741	3.15853	3.11256	3.18855	0.0368594	3.18617	0.0906437	ITGA7	integrin, alpha 7	Plasma Membrane	other	RNAseq_Specific
G11821	ENSRNOG00000046552	7	4698233..4911501	213269	3.39833	3.28001	3.79458	3.14391	3.48524	3.2636	3.49097	0.269503	3.29758	0.173183
G1184	Zfp715	1	99693945..99708207	14263	3.82948	3.67715	3.90024	3.715	3.74492	3.38179	3.80229	0.114004	3.61391	0.201571	Zfp715	zinc finger protein 715	Other	other	Common_Between_RNAseq_&_Microarray
G11893	Zfp938	7	10060906..10063355	2450	3	3	3	3	3.05028	3	3	0	3.01676	0.0290296
G11894	Zfp347	7	complement(10136669..10138411)	1743	3	3	3.46192	4.44673	4.74444	4.7814	3.15397	0.266689	4.65752	0.183483	Zfp932 (includes others)	zinc finger protein 932	Nucleus	other	Common_Between_RNAseq_&_Microarray
G119	Arhgap18	1	complement(20730432..20879837)	149406	3.15043	3.25683	3.12912	3.57316	3.56587	3.56284	3.17879	0.0684173	3.56729	0.0053088	ARHGAP18	Rho GTPase activating protein 18	Cytoplasm	other	RNAseq_Specific
G11905	Sirt6	7	11106748..11112173	5426	3.84964	3.83099	3.95151	3.69902	3.69736	3.8111	3.87738	0.0648691	3.73583	0.0651918	SIRT6	sirtuin 6	Nucleus	enzyme	Common_Between_RNAseq_&_Microarray
G11908	Aes	7	complement(11180239..11187085)	6847	8.20284	8.00426	8.10133	8.00928	8.00103	8.13368	8.10281	0.0992985	8.048	0.0743186	AES	amino-terminal enhancer of split	Nucleus	transcription regulator	Common_Between_RNAseq_&_Microarray
G11909	Gna11	7	11200712..11214475	13764	5.24022	5.26125	4.86067	4.82021	4.81564	4.82604	5.12071	0.225452	4.82063	0.00521229	GNA11	guanine nucleotide binding protein (G protein), alpha 11 (Gq class)	Plasma Membrane	enzyme	RNAseq_Specific
G11913	Ncln	7	11248842..11258770	9929	5.48541	5.30442	5.24593	5.44656	5.17742	5.48557	5.34526	0.124853	5.36985	0.167788	NCLN	nicalin	Cytoplasm	peptidase	Common_Between_RNAseq_&_Microarray
G11914	Celf5	7	11262657..11287130	24474	4.9257	4.98595	4.89384	4.90998	4.91835	4.9047	4.93516	0.0467769	4.91101	0.00687823	CELF5	CUGBP, Elav-like family member 5	Other	other	Common_Between_RNAseq_&_Microarray
G11917	Dohh	7	complement(11358019..11362757)	4739	4.76392	4.65791	4.6713	4.57924	4.62031	4.7282	4.69771	0.0577285	4.64258	0.0769361	DOHH	deoxyhypusine hydroxylase/monooxygenase	Cytoplasm	enzyme	Common_Between_RNAseq_&_Microarray
G11918	Fzr1	7	11368581..11380504	11924	5.40866	5.38436	5.22775	5.07605	5.07734	5.05533	5.34026	0.098186	5.06958	0.0123521	Fzr1	fizzy/cell division cycle 20 related 1 (Drosophila)	Nucleus	other	Common_Between_RNAseq_&_Microarray
G11919	4930404N11Rik	7	11382219..11383981	1763	6.19928	5.97235	5.70956	5.70182	5.60659	5.59559	5.9604	0.245076	5.63467	0.0584175
G11920	Mfsd12	7	complement(11383866..11390540)	6675	4.20345	3.82998	3.5126	3.70619	3.33963	3.51703	3.84868	0.345805	3.52095	0.183308	MFSD12	major facilitator superfamily domain containing 12	Cytoplasm	other	Common_Between_RNAseq_&_Microarray
G11921	Hmg20b	7	11405510..11410190	4681	3.00433	3	3.05117	3	3	3	3.0185	0.0283746	3	0	HMG20B	high mobility group 20B	Nucleus	transcription regulator	RNAseq_Specific
G11924	Cactin	7	complement(11427936..11432741)	4806	3.08306	3	3	3	3	3	3.02769	0.0479527	3	0	CACTIN	cactin, spliceosome C complex subunit	Nucleus	other	RNAseq_Specific
G11925	PIP5K1C	7	complement(11433956..11461658)	27703	5.16644	5.11368	4.89091	5.20917	5.09269	5.24688	5.05701	0.146247	5.18292	0.0803792	PIP5K1C	phosphatidylinositol-4-phosphate 5-kinase, type I, gamma	Plasma Membrane	kinase	Common_Between_RNAseq_&_Microarray
G11927	Apba3	7	complement(11481877..11486849)	4973	3.19755	3.08902	3.08732	3	3.06934	3.02394	3.12463	0.0631589	3.0311	0.0352208	APBA3	amyloid beta (A4) precursor protein-binding, family A, member 3	Cytoplasm	transporter	RNAseq_Specific
G11929	Mrpl54	7	11488465..11490985	2521	5.44093	5.3079	5.58421	5.16944	5.36855	5.38763	5.44434	0.138189	5.30854	0.120843	MRPL54	mitochondrial ribosomal protein L54	Cytoplasm	other	Common_Between_RNAseq_&_Microarray
G11930	Matk	7	complement(11492662..11497686)	5025	5.02904	4.75276	5.01502	4.16374	4.37827	4.16053	4.93227	0.155618	4.23418	0.124795	MATK	megakaryocyte-associated tyrosine kinase	Cytoplasm	kinase	RNAseq_Specific
G11931	Zfr2	7	complement(11503082..11521102)	18021	3.66013	3.48137	3.2977	3	3	3	3.47973	0.181222	3	0	ZFR2	zinc finger RNA binding protein 2	Other	other	Common_Between_RNAseq_&_Microarray
G11932	Atcay	7	11523425..11547188	23764	6.48478	6.51041	6.2213	6.81967	6.61029	6.63575	6.40549	0.160033	6.68857	0.114247	ATCAY	ataxia, cerebellar, Cayman type	Plasma Membrane	other	Common_Between_RNAseq_&_Microarray
G11934	Dapk3	7	complement(11559843..11568211)	8369	4.8462	4.91716	4.87453	4.39724	4.46772	4.47261	4.8793	0.0357173	4.44586	0.0421704	DAPK3	death-associated protein kinase 3	Cytoplasm	kinase	Common_Between_RNAseq_&_Microarray
G11935	Eef2	7	complement(11568907..11574177)	5271	9.49597	9.27425	9.12337	9.28282	9.20756	9.30082	9.29786	0.187419	9.26373	0.0494718	EEF2	eukaryotic translation elongation factor 2	Cytoplasm	translation regulator	Common_Between_RNAseq_&_Microarray
G11936	Pias4	7	11581929..11595424	13496	3.02394	3.1092	3.14309	3.25381	3.09998	3.20301	3.09208	0.0613886	3.1856	0.0783774	PIAS4	protein inhibitor of activated STAT, 4	Nucleus	transcription regulator	RNAseq_Specific
G11937	Zbtb7a	7	complement(11599413..11612150)	12738	3.1545	3.23094	3.12006	3.27557	3.17138	3.31812	3.1685	0.0567515	3.25502	0.075498	ZBTB7A	zinc finger and BTB domain containing 7A	Nucleus	transcription regulator	Common_Between_RNAseq_&_Microarray
G11938	Map2k2	7	complement(11626352..11645697)	19346	6.1536	5.96821	6.04144	5.80542	5.78737	5.82731	6.05442	0.0933774	5.8067	0.019997	MAP2K2	mitogen-activated protein kinase kinase 2	Cytoplasm	kinase	Common_Between_RNAseq_&_Microarray
G11940	Thop1	7	complement(11668513..11680853)	12341	4.55431	4.44838	4.45529	4.19404	3.95662	3.94916	4.48599	0.0592671	4.03327	0.139275	THOP1	thimet oligopeptidase 1	Cytoplasm	peptidase	RNAseq_Specific
G11941	Sgta	7	11689394..11705305	15912	6.7784	6.6074	6.43838	6.38499	6.26716	6.39283	6.60806	0.170015	6.34833	0.0704015	SGTA	small glutamine-rich tetratricopeptide repeat (TPR)-containing, alpha	Cytoplasm	other	Common_Between_RNAseq_&_Microarray
G11942	Slc39a3	7	11712392..11720741	8350	3.58401	3.5314	3.1999	3.48779	3.41536	3.5518	3.43843	0.208247	3.48499	0.0682629	SLC39A3	solute carrier family 39 (zinc transporter), member 3	Plasma Membrane	transporter	RNAseq_Specific
G11943	Diras1	7	11723556..11728420	4865	4.50061	4.32493	4.24091	5.39793	5.25938	5.39037	4.35548	0.132519	5.34923	0.0779037	DIRAS1	DIRAS family, GTP-binding RAS-like 1	Plasma Membrane	enzyme	RNAseq_Specific
G11947	Timm13	7	11844860..11845962	1103	4.81691	4.76764	5.07004	4.59364	4.82148	4.91309	4.88486	0.162246	4.77607	0.164493	TIMM13	translocase of inner mitochondrial membrane 13 homolog (yeast)	Cytoplasm	transporter	Common_Between_RNAseq_&_Microarray
G11949	Sppl2b	7	complement(11879708..11892558)	12851	3.56771	3.45928	3.54134	3.21933	3.08732	3.16575	3.52278	0.0565503	3.15747	0.0663938	SPPL2B	signal peptide peptidase like 2B	Plasma Membrane	peptidase	RNAseq_Specific
G11950	Lsm7	7	11892677..11895103	2427	5.713	5.64559	5.91731	5.76884	5.9689	5.82286	5.75863	0.141493	5.85353	0.103496	LSM7	LSM7 homolog, U6 small nuclear RNA associated (S. cerevisiae)	Nucleus	other	Common_Between_RNAseq_&_Microarray
G11952	Oaz1	7	complement(11919843..11922302)	2460	7.8722	7.86522	7.77422	6.97115	7.07899	7.21215	7.83721	0.0546683	7.08743	0.120719	OAZ1	ornithine decarboxylase antizyme 1	Cytoplasm	enzyme	Common_Between_RNAseq_&_Microarray
G11956	Sf3a2	7	complement(11945541..11951564)	6024	4.17576	4.08639	4.33814	4.04541	4.2302	4.40749	4.2001	0.127629	4.2277	0.181054	SF3A2	splicing factor 3a, subunit 2, 66kDa	Nucleus	other	Common_Between_RNAseq_&_Microarray
G11957	PLEKHJ1	7	11951787..11954190	2404	3.96541	4.14391	4.02603	3.84011	4.03793	4.02337	4.04512	0.0907684	3.96714	0.110249	PLEKHJ1	pleckstrin homology domain containing, family J member 1	Other	other	Common_Between_RNAseq_&_Microarray
G11959	Ap3d1	7	12006416..12041236	34821	6.40659	6.43263	6.17502	6.47775	6.3146	6.45343	6.33808	0.141808	6.41526	0.088018	AP3D1	adaptor-related protein complex 3, delta 1 subunit	Cytoplasm	transporter	Common_Between_RNAseq_&_Microarray
G11961	Mob3a	7	12046195..12063525	17331	3.64524	3.91128	3.7747	3.84512	3.82546	3.93269	3.77707	0.133036	3.86776	0.0570845	MOB3A	MOB kinase activator 3A	Other	other	Common_Between_RNAseq_&_Microarray
G11962	Mknk2	7	12075366..12086471	11106	3.69791	3.47494	3.49737	3.58101	3.57255	3.76464	3.55674	0.122768	3.6394	0.108545	MKNK2	MAP kinase interacting serine/threonine kinase 2	Cytoplasm	kinase	RNAseq_Specific
G11964	Btbd2	7	12097176..12110126	12951	5.88472	5.84185	5.48719	5.13843	5.14292	5.15512	5.73792	0.218193	5.14549	0.00863297	BTBD2	BTB (POZ) domain containing 2	Cytoplasm	other	Common_Between_RNAseq_&_Microarray
G11965	Csnk1g2	7	complement(12112483..12130793)	18311	5.45416	5.42268	5.401	5.4351	5.44888	5.51175	5.42594	0.0267298	5.46524	0.0408641	CSNK1G2	casein kinase 1, gamma 2	Cytoplasm	kinase	Common_Between_RNAseq_&_Microarray
G11966	Scamp4	7	complement(12137246..12149666)	12421	4.96691	4.84447	4.87133	5.04094	4.91502	5.19328	4.89424	0.064356	5.04975	0.13934	SCAMP4	secretory carrier membrane protein 4	Cytoplasm	other	Common_Between_RNAseq_&_Microarray
G11967	Abhd17a	7	12160068..12166498	6431	4.96413	5.09014	4.76764	4.9107	4.96993	5.03566	4.94064	0.16253	4.9721	0.0625079	ABHD17A	abhydrolase domain containing 17A	Other	enzyme	Common_Between_RNAseq_&_Microarray
G11968	Klf16	7	12174235..12184049	9815	3.31812	3.4248	3.33535	3.25683	3.27405	3.26959	3.35942	0.057269	3.26683	0.00893698	KLF16	Kruppel-like factor 16	Nucleus	transcription regulator	Common_Between_RNAseq_&_Microarray
G11969	Rexo1	7	12189793..12209185	19393	3.61729	3.48716	3.46323	3.45272	3.29991	3.51069	3.52256	0.0829065	3.42111	0.108891	REXO1	REX1, RNA exonuclease 1 homolog (S. cerevisiae)	Nucleus	transcription regulator	RNAseq_Specific
G11972	Tcf3	7	12316323..12338454	22132	4.18414	4.01312	4.03618	3.64295	3.67998	3.68056	4.07781	0.0928028	3.66783	0.0215447	TCF3	transcription factor 3	Nucleus	transcription regulator	RNAseq_Specific
G11973	Uqcr11	7	12341264..12345890	4627	7.10556	7.27361	7.17465	6.68937	6.8268	6.74167	7.18461	0.0844705	6.75261	0.0693654	UQCR11	ubiquinol-cytochrome c reductase, complex III subunit XI	Cytoplasm	enzyme	Common_Between_RNAseq_&_Microarray
G11974	MBD3	7	12349402..12356298	6897	5.83403	5.59559	5.70998	5.4146	5.41358	5.50874	5.7132	0.119251	5.44564	0.05465	MBD3	methyl-CpG binding domain protein 3	Nucleus	other	Common_Between_RNAseq_&_Microarray
G11975	Mex3d	7	12361697..12367764	6068	3	3.09664	3	3	3	3	3.03221	0.0557937	3	0	MEX3D	mex-3 RNA binding family member D	Nucleus	other	RNAseq_Specific
G1198	Zfp719	1	100574928..100581740	6813	3.02572	3.06503	3.10335	3.28001	3.23936	3.19518	3.0647	0.0388153	3.23818	0.0424256	ZNF175	zinc finger protein 175	Nucleus	transcription regulator	RNAseq_Specific
G11981	Reep6	7	complement(12409855..12416524)	6670	3	3	3	3	3	3.01417	3	0	3.00472	0.00818021	REEP6	receptor accessory protein 6	Plasma Membrane	other	RNAseq_Specific
G11983	RGD1359127	7	12426182..12428308	2127	3	3	3	3	3	3.14309	3	0	3.0477	0.0826106	C19orf25	chromosome 19 open reading frame 25	Other	other	RNAseq_Specific
G11984	Apc2	7	complement(12428263..12444598)	16336	4.67559	4.7732	4.4401	4.39964	4.3285	4.50408	4.62963	0.171239	4.41074	0.0883166	APC2	adenomatosis polyposis coli 2	Cytoplasm	enzyme	Common_Between_RNAseq_&_Microarray
G11985	Rps15	7	complement(12451930..12453368)	1439	8.14273	8.23095	8.17936	7.84314	7.90833	8.01642	8.18435	0.0443198	7.92263	0.0875199	RPS15	ribosomal protein S15	Cytoplasm	other	Common_Between_RNAseq_&_Microarray
G11986	Dazap1	7	complement(12460102..12480849)	20748	5.0081	5.11035	5.36383	5.11347	5.23755	5.10091	5.16076	0.183146	5.15064	0.0755255	DAZAP1	DAZ associated protein 1	Cytoplasm	other	Common_Between_RNAseq_&_Microarray
G11987	Gamt	7	12484550..12487284	2735	4.71565	5.00676	4.87058	4.34983	4.62325	4.55277	4.86433	0.145656	4.50862	0.141958	GAMT	guanidinoacetate N-methyltransferase	Cytoplasm	enzyme	Common_Between_RNAseq_&_Microarray
G11988	Ndufs7	7	complement(12488477..12495748)	7272	6.2804	6.11894	6.22487	5.8157	5.89506	5.9046	6.20807	0.0820282	5.87179	0.0488063	NDUFS7	NADH dehydrogenase (ubiquinone) Fe-S protein 7, 20kDa (NADH-coenzyme Q reductase)	Cytoplasm	enzyme	Common_Between_RNAseq_&_Microarray
G11989	Mum1	7	complement(12501116..12516175)	15060	4.24661	4.33277	4.3242	4.07144	4.1308	4.12585	4.3012	0.0474631	4.10936	0.0329333	MUM1	melanoma associated antigen (mutated) 1	Nucleus	other	RNAseq_Specific
G11991	RGD1562114	7	complement(12568305..12570015)	1711	3	3.00971	3.1944	3.473	3.68674	3.99558	3.06804	0.109543	3.71844	0.262729	C19orf24	chromosome 19 open reading frame 24	Other	other	Common_Between_RNAseq_&_Microarray
G11992	Cirbp	7	complement(12571310..12575127)	3818	5.57577	5.62498	5.55765	4.61913	4.79786	4.63867	5.58613	0.0348385	4.68522	0.0980396	CIRBP	cold inducible RNA binding protein	Nucleus	translation regulator	Common_Between_RNAseq_&_Microarray
G11993	Midn	7	complement(12585958..12592656)	6699	3.59063	3.75239	3.71114	4.09869	3.69514	3.99919	3.68472	0.0840574	3.93101	0.21024	MIDN	midnolin	Nucleus	other	RNAseq_Specific
G11994	Atp5d	7	complement(12596918..12600125)	3208	6.69474	6.78699	6.78234	6.80374	7.01645	7.04269	6.75469	0.0519703	6.9543	0.131041	ATP5D	ATP synthase, H+ transporting, mitochondrial F1 complex, delta subunit	Cytoplasm	transporter	Common_Between_RNAseq_&_Microarray
G11995	Dos	7	12605828..12611153	5326	8.08534	8.09669	7.92342	8.10784	7.97947	8.21273	8.03515	0.0969285	8.10001	0.116831	Dos	downstream of Stk11	Other	other	Common_Between_RNAseq_&_Microarray
G11996	Stk11	7	complement(12610856..12627616)	16761	5.75876	5.86307	5.92029	5.75288	5.88813	6.05039	5.84737	0.0819049	5.89714	0.148959	STK11	serine/threonine kinase 11	Cytoplasm	kinase	RNAseq_Specific
G11998	GPX4	7	complement(12686678..12688775)	2098	6.80374	6.69689	6.89588	6.84428	6.93854	6.96644	6.79884	0.0995825	6.91642	0.0640136	GPX4	glutathione peroxidase 4	Cytoplasm	enzyme	Common_Between_RNAseq_&_Microarray
G11999	Polr2e	7	12702978..12706900	3923	6.12578	6.11114	6.05886	5.76977	5.79882	5.86332	6.09859	0.0351795	5.81064	0.0478805	POLR2E	polymerase (RNA) II (DNA directed) polypeptide E, 25kDa	Nucleus	enzyme	Common_Between_RNAseq_&_Microarray
G12000	Hmha1	7	complement(12711159..12910971)	199813	4.80329	4.76445	4.93183	4.48845	4.54479	4.48749	4.83319	0.0876033	4.50691	0.0328104	HMHA1	histocompatibility (minor) HA-1	Cytoplasm	transporter	Common_Between_RNAseq_&_Microarray
G12001	Wdr18	7	complement(12731050..12738845)	7796	5.34851	5.28788	5.22602	4.88967	4.8064	4.93611	5.28747	0.0612442	4.87739	0.0657199	WDR18	WD repeat domain 18	Nucleus	other	Common_Between_RNAseq_&_Microarray
G12004	R3hdm4	7	12781190..12788308	7119	4.95554	4.71073	4.76844	4.41531	4.5189	4.51259	4.81157	0.127977	4.48226	0.0580746	R3HDM4	R3H domain containing 4	Other	other	RNAseq_Specific
G12005	Med16	7	12789464..12801962	12499	4.5993	4.40136	4.1279	3.71281	3.66582	3.715	4.37619	0.236705	3.69788	0.0277808	MED16	mediator complex subunit 16	Nucleus	transcription regulator	Common_Between_RNAseq_&_Microarray
G12009	Lppr3	7	12822277..12833539	11263	5.14292	4.92995	5.13884	4.00952	4.19206	3.68056	5.07057	0.121801	3.96071	0.259222	LPPR3	lipid phosphate phosphatase-related protein type 3	Other	phosphatase	Common_Between_RNAseq_&_Microarray
G12011	Ptbp1	7	complement(12833688..12843440)	9753	4.09573	4.08083	4.24889	4.3727	4.10249	4.40033	4.14182	0.0930268	4.29184	0.16456	PTBP1	polypyrimidine tract binding protein 1	Nucleus	enzyme	Common_Between_RNAseq_&_Microarray
G12013	Palm	7	complement(12877762..12963915)	86154	6.07028	5.92695	5.81686	5.20468	5.32169	5.33177	5.93803	0.127073	5.28605	0.0706434	PALM	paralemmin	Plasma Membrane	other	Common_Between_RNAseq_&_Microarray
G12014	Abca7	7	complement(12912237..12930983)	18747	3.70013	3.68507	3.72049	4.30686	4.06278	4.33743	3.7019	0.0177737	4.23569	0.150521	ABCA7	ATP-binding cassette, sub-family A (ABC1), member 7	Plasma Membrane	transporter	Common_Between_RNAseq_&_Microarray
G12016	Mbrl	7	complement(12940961..12947623)	6663	5.65435	5.48719	5.41848	5.68664	5.4838	5.6932	5.52	0.121311	5.62122	0.119049	TMEM259	transmembrane protein 259	Other	other	Common_Between_RNAseq_&_Microarray
G12017	Cnn2	7	12952278..12957474	5197	3	3	3	3.18964	3.10502	3.39833	3	0	3.231	0.150964	Cnn2	calponin 2	Other	other	RNAseq_Specific
G1202	Ctu1	1	100668356..100674148	5793	3	3	3	3.02749	3.08902	3.16817	3	0	3.09489	0.0705253	CTU1	cytosolic thiouridylase subunit 1	Cytoplasm	other	RNAseq_Specific
G12020	Rnf126	7	12991016..12998304	7289	4.50694	4.3692	4.37513	4.29884	4.29442	4.42338	4.41709	0.0778695	4.33888	0.0732088	RNF126	ring finger protein 126	Other	other	Common_Between_RNAseq_&_Microarray
G12021	Fgf22	7	complement(12999989..13001879)	1891	4.22712	4.23402	3.96541	4.05023	3.99919	4.16456	4.14218	0.153128	4.07133	0.0846776	FGF22	fibroblast growth factor 22	Extracellular Space	growth factor	RNAseq_Specific
G12022	Polrmt	7	13011142..13021357	10216	3.46323	3.2263	3.32819	3.04157	3	3.08049	3.33924	0.118851	3.04069	0.040251	POLRMT	polymerase (RNA) mitochondrial (DNA directed)	Cytoplasm	enzyme	RNAseq_Specific
G12023	Hcn2	7	complement(13021934..13040277)	18344	4.08682	4.22366	4.00773	4.20658	4.05543	4.28704	4.10607	0.109246	4.18302	0.117588	HCN2	hyperpolarization activated cyclic nucleotide-gated potassium channel 2	Plasma Membrane	ion channel	Common_Between_RNAseq_&_Microarray
G12024	Bsg	7	complement(13044573..13051789)	7217	8.70371	8.64926	8.72525	8.65616	8.81446	8.75975	8.69274	0.0391631	8.74346	0.0803962	BSG	basigin (Ok blood group)	Plasma Membrane	transporter	Common_Between_RNAseq_&_Microarray
G12025	Gzmm	7	complement(13062468..13068067)	5600	4.12954	3	3.82494	3	3	3	3.65149	0.584405	3	0	GZMM	granzyme M (lymphocyte met-ase 1)	Cytoplasm	peptidase	RNAseq_Specific
G12026	Cdc34	7	complement(13068994..13074382)	5389	4.59185	4.63635	4.70548	4.99907	5.035	5.14598	4.64456	0.0572602	5.06002	0.0765817	CDC34	cell division cycle 34	Nucleus	enzyme	Common_Between_RNAseq_&_Microarray
G12027	Tpgs1	7	complement(13080966..13086888)	5923	4.42405	4.42338	4.55797	4.19679	4.24434	4.34843	4.46846	0.077514	4.26319	0.0775568	TPGS1	tubulin polyglutamylase complex subunit 1	Cytoplasm	other	Common_Between_RNAseq_&_Microarray
G12031	Shc2	7	13117670..13139889	22220	4.05543	4.05632	4.01358	3.96033	3.89348	3.99963	4.04178	0.0244228	3.95115	0.0536693	SHC2	SHC (Src homology 2 domain containing) transforming protein 2	Cytoplasm	other	RNAseq_Specific
G12032	C2cd4c	7	13142884..13145045	2162	3.22708	3.25381	3	3	3	3	3.1603	0.139463	3	0	C2CD4C	C2 calcium-dependent domain containing 4C	Extracellular Space	other	RNAseq_Specific
G12034	Mier2	7	13203327..13219032	15706	3.58222	3.42008	3.52394	3.61789	3.60846	3.74865	3.50874	0.0821286	3.65833	0.0783602	MIER2	mesoderm induction early response 1, family member 2	Extracellular Space	other	Common_Between_RNAseq_&_Microarray
G12035	Ppap2c	7	13225606..13233682	8077	3.65843	3.53826	3.71004	4.05066	4.05848	4.18175	3.63557	0.0881426	4.09696	0.0735326	PPAP2C	phosphatidic acid phosphatase type 2C	Plasma Membrane	phosphatase	Common_Between_RNAseq_&_Microarray
G12036	Giot1	7	complement(13266211..13267989)	1779	3	3	3	4.12502	4.02294	4.63169	3	0	4.25988	0.326014	Zfp932 (includes others)	zinc finger protein 932	Nucleus	other	Common_Between_RNAseq_&_Microarray
G12037	ENSRNOG00000032182	7	complement(13288416..13289854)	1439	3	3	3	3.20614	3.25683	3.33821	3	0	3.26706	0.0666256
G12039	2610008E11Rik	7	13517760..13533965	16206	3.17217	3.33963	3.07106	3.10502	3.10335	3	3.19429	0.135646	3.06946	0.0601565
G12049	Slc1a6	7	complement(13893842..13915011)	21170	3	3	3	3.03982	3.4315	3.42143	3	0	3.29758	0.223285	SLC1A6	solute carrier family 1 (high affinity aspartate/glutamate transporter), member 6	Plasma Membrane	transporter	RNAseq_Specific
G12055	Ilvbl	7	complement(14201069..14211122)	10054	3.41401	3.21702	3.37139	3.49547	3.41197	3.46649	3.33414	0.103645	3.45797	0.0423947	ILVBL	ilvB (bacterial acetolactate synthase)-like	Cytoplasm	enzyme	Common_Between_RNAseq_&_Microarray
G12059	Notch3	7	complement(14294587..14345774)	51188	3.18093	3.21235	3	3.3658	3	3.42748	3.1311	0.114614	3.26443	0.231069	NOTCH3	notch 3	Plasma Membrane	transcription regulator	RNAseq_Specific
G12062	Brd4	7	complement(14378187..14457537)	79351	4.09318	4.04849	4.02649	4.05848	4.0019	4.07572	4.05605	0.0339856	4.04537	0.0386194	BRD4	bromodomain containing 4	Nucleus	kinase	Common_Between_RNAseq_&_Microarray
G12063	Akap8	7	complement(14477686..14493949)	16264	5.52167	5.44359	5.55029	4.99862	5.05511	4.87453	5.50518	0.0552282	4.97609	0.092374	AKAP8	A kinase (PRKA) anchor protein 8	Nucleus	other	Common_Between_RNAseq_&_Microarray
G12064	Akap8l	7	complement(14494266..14523993)	29728	6.21704	5.95896	6.28956	5.65248	5.60318	5.48541	6.15518	0.173762	5.58036	0.0858419	AKAP8L	A kinase (PRKA) anchor protein 8-like	Nucleus	other	Common_Between_RNAseq_&_Microarray
G12065	Wiz	7	complement(14528651..14556359)	27709	3.32819	3.28001	3.27779	3.01595	3.06503	3.23708	3.29533	0.0284789	3.10602	0.116121	Wiz	widely-interspaced zinc finger motifs	Nucleus	other	RNAseq_Specific
G12070	Cyp4f17	7	14682232..14697943	15712	3.98379	3.84915	4.09532	3.66299	3.57255	3.58943	3.97609	0.123261	3.60832	0.0480928	Cyp4f17	cytochrome P450, family 4, subfamily f, polypeptide 17	Other	other	RNAseq_Specific
G12092	RGD1560687	7	15550505..15551413	909	4.87601	4.69495	4.6453	4.88286	5.06681	5.25352	4.73875	0.121433	5.06773	0.18533	FTL	ferritin, light polypeptide	Cytoplasm	enzyme	Common_Between_RNAseq_&_Microarray
G12100	Zfp955a	7	15957414..15961350	3937	3.61022	3.79559	3.64984	3.62141	3.71827	3.51451	3.68522	0.097619	3.61807	0.101923	Zfp955a/Zfp955b	zinc finger protein 955B	Other	other	Common_Between_RNAseq_&_Microarray
G12133	ENSRNOG00000008857	7	18586778..18603292	16515	3.65614	3.48716	3.60669	3.48779	3.41807	3.54071	3.58333	0.0868781	3.48219	0.0615148	ADAMTS10	ADAM metallopeptidase with thrombospondin type 1 motif, 10	Extracellular Space	peptidase	Common_Between_RNAseq_&_Microarray
G12135	Zfp414	7	18675411..18678017	2607	4.42775	4.32493	4.32168	3.70124	3.81623	3.8008	4.35812	0.0603197	3.77276	0.0624144	ZNF414	zinc finger protein 414	Other	other	RNAseq_Specific
G12137	Hnrnpm	7	complement(18693856..18731848)	37993	5.7241	5.71603	5.59962	5.50684	5.33925	5.33978	5.67992	0.0696596	5.39529	0.0966029	HNRNPM	heterogeneous nuclear ribonucleoprotein M	Nucleus	other	Common_Between_RNAseq_&_Microarray
G12138	March2	7	complement(18736909..18754963)	18055	5.16944	5.04727	5.03391	4.91525	4.96136	4.91525	5.08354	0.0746906	4.93062	0.0266166	MARCH2	membrane-associated ring finger (C3HC4) 2, E3 ubiquitin protein ligase	Cytoplasm	enzyme	Common_Between_RNAseq_&_Microarray
G12139	Rab11b	7	complement(18776594..18789732)	13139	7.22105	7.28883	7.10535	6.70529	6.72342	6.66839	7.20508	0.0927797	6.69903	0.0280443	RAB11B	RAB11B, member RAS oncogene family	Cytoplasm	enzyme	Common_Between_RNAseq_&_Microarray
G12140	Angptl4	7	complement(18805416..18811643)	6228	4.34384	3.85116	3.99198	3.81212	4.34027	3.92749	4.06232	0.253763	4.02663	0.277677	ANGPTL4	angiopoietin-like 4	Extracellular Space	other	Common_Between_RNAseq_&_Microarray
G12141	Kank3	7	18846292..18859539	13248	3.92515	3.76304	3.92372	3.67547	3.80695	3.80904	3.87063	0.0931865	3.76382	0.0765214	KANK3	KN motif and ankyrin repeat domains 3	Cytoplasm	other	Common_Between_RNAseq_&_Microarray
G12142	Rps28	7	complement(18859671..18861040)	1370	7.25951	7.22769	7.15036	6.87355	6.9945	7.22448	7.21252	0.0561314	7.03084	0.178268	Rps28	ribosomal protein S28	Cytoplasm	other	Common_Between_RNAseq_&_Microarray
G12143	Ndufa7	7	18861110..18873924	12815	6.1151	6.03936	6.14476	6.00484	6.12639	6.16068	6.09974	0.0543536	6.0973	0.0818932	Ndufa7	NADH dehydrogenase (ubiquinone) 1 alpha subcomplex, 7	Cytoplasm	other	Common_Between_RNAseq_&_Microarray
G12144	Cd320	7	18878075..18883844	5770	5.87504	5.86901	5.82324	5.8525	5.92386	5.89797	5.85576	0.0283277	5.89144	0.0361265	CD320	CD320 molecule	Plasma Membrane	other	Common_Between_RNAseq_&_Microarray
G12150	RGD1566251	7	20432424..20644702	212279	5.70224	5.13536	5.80361	5.58256	5.49233	5.43477	5.54707	0.360137	5.50322	0.074494	LOC100361411 (includes others)	similar to hypothetical protein 4930509O22	Other	other	RNAseq_Specific
G12156	Syn3	7	23553826..23958150	404325	6.07563	5.99322	5.78881	5.67454	5.61692	6.12639	5.95255	0.147671	5.80595	0.279004	SYN3	synapsin III	Plasma Membrane	other	RNAseq_Specific
G12157	Timp3	7	complement(23694454..23744372)	49919	3.62141	3.8008	3	3.52207	3.07365	3.81777	3.47407	0.420241	3.47116	0.374666	TIMP3	TIMP metallopeptidase inhibitor 3	Extracellular Space	other	Common_Between_RNAseq_&_Microarray
G12158	Fbxo7	7	complement(23964802..23993030)	28229	5.12032	5.14354	5.14271	5.23142	5.30533	5.41137	5.13552	0.0131719	5.31604	0.0904546	FBXO7	F-box protein 7	Cytoplasm	enzyme	Common_Between_RNAseq_&_Microarray
G12160	Rtcb	7	24063301..24082716	19416	6.11343	6.14078	6.02967	6.06533	6.04494	6.04188	6.09463	0.05789	6.05072	0.0127472	RTCB	RNA 2',3'-cyclic phosphate and 5'-OH ligase	Cytoplasm	enzyme	Common_Between_RNAseq_&_Microarray
G12163	Prdm4	7	24114241..24135565	21325	4.14269	4.26096	4.20737	4.24851	4.13777	4.02116	4.20367	0.0592193	4.13581	0.113684	PRDM4	PR domain containing 4	Nucleus	transcription regulator	RNAseq_Specific
G12164	Pwp1	7	complement(24138856..24154854)	15999	3.76891	3.77681	3.86953	3.8396	3.90168	3.9156	3.80508	0.0559509	3.88563	0.0404633	PWP1	PWP1 homolog (S. cerevisiae)	Nucleus	other	RNAseq_Specific
G12165	Btbd11	7	complement(24194086..24465369)	271284	3.34106	3.39354	3.2977	3.79714	3.49547	3.56587	3.3441	0.0479959	3.61949	0.157821	Btbd11	BTB (POZ) domain containing 11	Other	other	Common_Between_RNAseq_&_Microarray
G12167	Cry1	7	24683890..24784328	100439	3.09578	3.17617	3.2386	3.40516	3.34677	3.30284	3.17019	0.0715992	3.35159	0.0513306	CRY1	cryptochrome circadian clock 1	Nucleus	enzyme	Common_Between_RNAseq_&_Microarray
G12169	Mterfd3	7	24788439..24798713	10275	3.6567	3.715	3.66071	3.48524	3.5798	3.60137	3.67747	0.0325659	3.55547	0.0617687	MTERFD3	MTERF domain containing 3	Cytoplasm	transcription regulator	RNAseq_Specific
G12170	RGD1563325	7	complement(24797541..24817759)	20219	7.19546	7.1436	7.13439	7.85016	7.66348	7.57941	7.15782	0.0329252	7.69768	0.138581	C12orf23	chromosome 12 open reading frame 23	Other	other	Common_Between_RNAseq_&_Microarray
G12172	Tcp11l2	7	complement(25004999..25031722)	26724	3.918	3.72922	3.95335	3.67998	3.60846	3.60903	3.86686	0.120501	3.63249	0.0411287	TCP11L2	t-complex 11, testis-specific-like 2	Other	other	Common_Between_RNAseq_&_Microarray
G12173	Ckap4	7	25084905..25093002	8098	4.20972	4.39104	4.47783	5.47278	5.03566	5.16723	4.35953	0.136806	5.22523	0.224257	CKAP4	cytoskeleton-associated protein 4	Cytoplasm	other	Common_Between_RNAseq_&_Microarray
G12175	1500009L16Rik	7	complement(25878012..25878803)	792	3.16575	4.06626	3	3	3	3	3.41067	0.573777	3	0
G12177	Ric8b	7	26049680..26142157	92478	4.51354	4.67644	4.48298	4.69188	4.53018	4.57318	4.55766	0.104003	4.59841	0.0837519	RIC8B	RIC8 guanine nucleotide exchange factor B	Cytoplasm	other	RNAseq_Specific
G12180	Appl2	7	26387152..26436562	49411	4.56254	4.04628	4.16174	4.40272	4.2737	4.32813	4.25685	0.270952	4.33485	0.0647748	APPL2	adaptor protein, phosphotyrosine interaction, PH domain and leucine zipper containing 2	Cytoplasm	other	Common_Between_RNAseq_&_Microarray
G12181	RGD1309995	7	complement(26439714..26491588)	51875	4.14188	4.10585	4.19915	4.06322	4.01717	3.9737	4.14896	0.0470499	4.01803	0.0447661	KIAA1033	KIAA1033	Cytoplasm	other	Common_Between_RNAseq_&_Microarray
G12183	Aldh1l2	7	26506321..26555206	48886	3	3	3	3.79201	3.84915	4.26322	3	0	3.96813	0.257148	ALDH1L2	aldehyde dehydrogenase 1 family, member L2	Cytoplasm	enzyme	Common_Between_RNAseq_&_Microarray
G12185	RGD1563365	7	complement(26602287..26607557)	5271	4.36429	4.43344	4.20933	4.65962	4.78298	4.91954	4.33569	0.114758	4.78738	0.130018	C12orf45	chromosome 12 open reading frame 45	Other	other	Common_Between_RNAseq_&_Microarray
G12186	Slc41a2	7	26651682..26734269	82588	3.77208	3.65214	3.84815	4.86813	4.80355	4.86363	3.75746	0.0988201	4.8451	0.0360567	SLC41A2	solute carrier family 41 (magnesium transporter), member 2	Plasma Membrane	transporter	Common_Between_RNAseq_&_Microarray
G12188	Txnrd1	7	complement(27065820..27104095)	38276	5.52073	5.5472	5.40934	5.90183	5.77386	5.82324	5.49243	0.0731578	5.83298	0.0645398	TXNRD1	thioredoxin reductase 1	Cytoplasm	enzyme	Common_Between_RNAseq_&_Microarray
G12189	Nfyb	7	27200204..27216014	15811	3.96033	3.99963	3.97876	3.65957	3.76145	3.58101	3.97957	0.0196639	3.66734	0.0904716	NFYB	nuclear transcription factor Y, beta	Nucleus	transcription regulator	Common_Between_RNAseq_&_Microarray
G12190	Hcfc2	7	complement(27226472..27255036)	28565	3.76891	3.82596	3.8111	3.97462	3.93269	3.94684	3.80199	0.0295984	3.95138	0.0213321	HCFC2	host cell factor C2	Nucleus	transcription regulator	Common_Between_RNAseq_&_Microarray
G12192	Tdg	7	complement(27313358..27333042)	19685	3.64642	3.70508	3.79714	3.78992	3.58222	3.70289	3.71621	0.075975	3.69168	0.104306	TDG	thymine-DNA glycosylase	Nucleus	enzyme	Common_Between_RNAseq_&_Microarray
G12193	1190007I07Rik	7	27340344..27343437	3094	3.69679	4.01895	4.09573	3.5012	3.82288	3.68056	3.93716	0.211672	3.66821	0.161195
G12194	Hsp90b1	7	complement(27345730..27359757)	14028	9.02266	9.09417	9.13254	9.09417	9.10841	8.88227	9.08312	0.0557664	9.02828	0.126655	HSP90B1	heat shock protein 90kDa beta (Grp94), member 1	Cytoplasm	other	Common_Between_RNAseq_&_Microarray
G12209	Nup37	7	28825302..28853301	28000	3.52332	3.47623	3.66413	3.39077	3.60078	3.40516	3.55456	0.0977672	3.46557	0.117317	NUP37	nucleoporin 37kDa	Nucleus	transporter	Common_Between_RNAseq_&_Microarray
G12210	Ccdc53	7	28872399..28917928	45530	4.3449	4.38932	4.37478	4.18494	4.4401	4.27219	4.36967	0.022648	4.29908	0.129688	CCDC53	coiled-coil domain containing 53	Cytoplasm	other	Common_Between_RNAseq_&_Microarray
G12213	Gnptab	7	29063508..29128693	65186	3.37415	3.57801	3.29551	3.54813	3.44744	3.50883	3.41589	0.145801	3.50147	0.050747	GNPTAB	N-acetylglucosamine-1-phosphate transferase, alpha and beta subunits	Other	enzyme	Common_Between_RNAseq_&_Microarray
G12214	Sycp3	7	29136815..29151274	14460	4.38312	4.24661	4.23365	4.06236	4.06322	3.78781	4.28779	0.0828093	3.97113	0.158759	SYCP3	synaptonemal complex protein 3	Nucleus	other	RNAseq_Specific
G12215	Chpt1	7	complement(29150843..29177859)	27017	4.16254	4.11755	4.05976	3.89927	3.88472	3.75823	4.11328	0.0515206	3.84741	0.0775699	CHPT1	choline phosphotransferase 1	Cytoplasm	enzyme	Common_Between_RNAseq_&_Microarray
G12220	Arl1	7	29384709..29396455	11747	6.22381	6.35974	6.31098	6.3875	6.53044	6.49537	6.29818	0.0688654	6.4711	0.0744977	ARL1	ADP-ribosylation factor-like 1	Cytoplasm	enzyme	Common_Between_RNAseq_&_Microarray
G12228	Scyl2	7	complement(30387991..30441330)	53340	3.99693	4.17855	4.14473	4.35585	4.27631	4.31157	4.10674	0.096591	4.31458	0.0398566	SCYL2	SCY1-like 2 (S. cerevisiae)	Cytoplasm	other	Common_Between_RNAseq_&_Microarray
G12229	Actr6	7	complement(30474273..30494826)	20554	5.04749	4.97428	5.21228	4.9745	5.10028	5.02062	5.07801	0.121901	5.0318	0.06363	ACTR6	ARP6 actin-related protein 6 homolog (yeast)	Other	transporter	Common_Between_RNAseq_&_Microarray
G12230	Uhrf1bp1l	7	30505665..30553762	48098	3.90744	3.87886	3.8774	4.26435	4.23977	4.2636	3.8879	0.0169344	4.2559	0.0139797	UHRF1BP1L	UHRF1 binding protein 1-like	Other	other	Common_Between_RNAseq_&_Microarray
G12231	Anks1b	7	30922186..31772758	850573	3	3.04854	3.13571	3.25304	3.12088	3.18486	3.06141	0.0687629	3.18626	0.0660932	Anks1b	ankyrin repeat and sterile alpha motif domain containing 1B	Other	other	Common_Between_RNAseq_&_Microarray
G12234	Ikbip	7	31873293..31891984	18692	4.29	4.21554	4.54479	4.70631	4.82604	4.85174	4.35011	0.17266	4.7947	0.0776176	IKBIP	IKBKB interacting protein	Cytoplasm	other	Common_Between_RNAseq_&_Microarray
G12235	Slc25a3	7	complement(31904034..31911476)	7443	8.3998	8.53309	8.45973	8.45636	8.57411	8.55409	8.46421	0.0667598	8.52819	0.0630048	SLC25A3	solute carrier family 25 (mitochondrial carrier; phosphate carrier), member 3	Cytoplasm	transporter	Common_Between_RNAseq_&_Microarray
G12236	Tmpo	7	complement(31934412..31952695)	18284	4.15488	4.14269	4.30686	4.07445	4.1279	4.03398	4.20148	0.0914641	4.07878	0.0471097	TMPO	thymopoietin	Nucleus	other	Common_Between_RNAseq_&_Microarray
G12248	Cdk17	7	34066669..34144779	78111	5.00112	5.10322	5.06465	5.09078	5.11679	5.00676	5.05633	0.0515599	5.07145	0.0575063	CDK17	cyclin-dependent kinase 17	Cytoplasm	kinase	Common_Between_RNAseq_&_Microarray
G12249	Elk3	7	complement(34151383..34186857)	35475	3.09832	3.1545	3.15205	3.62843	3.64984	3.91128	3.13496	0.0317492	3.72985	0.157486	ELK3	ELK3, ETS-domain protein (SRF accessory protein 2)	Nucleus	transcription regulator	Common_Between_RNAseq_&_Microarray
G12250	Lta4h	7	34353506..34385290	31785	4.35585	4.46805	4.46575	4.31844	4.4227	4.41531	4.42988	0.0641224	4.38548	0.05818	LTA4H	leukotriene A4 hydrolase	Cytoplasm	enzyme	Common_Between_RNAseq_&_Microarray
G12255	Snrpf	7	complement(34543253..34549956)	6704	4.76949	4.80406	5.221	4.70244	4.93088	4.72411	4.93152	0.251296	4.78581	0.126101	SNRPF	small nuclear ribonucleoprotein polypeptide F	Nucleus	other	Common_Between_RNAseq_&_Microarray
G12256	Ntn4	7	34599083..34705852	106770	3	3	3	3.08049	3.29625	3.09578	3	0	3.15751	0.120401	NTN4	netrin 4	Extracellular Space	other	RNAseq_Specific
G12258	Metap2	7	complement(34821204..34853497)	32294	6.09814	6.22188	6.18963	6.17512	6.18854	6.17153	6.16988	0.0641896	6.1784	0.00896627	METAP2	methionyl aminopeptidase 2	Cytoplasm	peptidase	Common_Between_RNAseq_&_Microarray
G12260	Vezt	7	complement(34946146..35009764)	63619	5.32926	5.36383	5.42387	5.83238	5.8431	5.82985	5.37232	0.0478712	5.83511	0.00703539	VEZT	vezatin, adherens junctions transmembrane protein	Plasma Membrane	other	Common_Between_RNAseq_&_Microarray
G12262	Nr2c1	7	35137598..35189641	52044	3.69736	3.49928	3.82797	3.65843	3.56221	3.48716	3.67487	0.165497	3.56927	0.0858511	NR2C1	nuclear receptor subfamily 2, group C, member 1	Nucleus	transcription regulator	RNAseq_Specific
G12263	Ndufa12	7	35193809..35229886	36078	6.72642	6.79934	6.903	6.35403	6.84535	6.78096	6.80959	0.0887336	6.66011	0.267027	NDUFA12	NADH dehydrogenase (ubiquinone) 1 alpha subcomplex, 12	Cytoplasm	enzyme	Common_Between_RNAseq_&_Microarray
G12265	Tmcc3	7	35536671..35608377	71707	3.05028	3.29037	3.13325	3.29404	3.21312	3.1999	3.15797	0.121936	3.23568	0.050965	TMCC3	transmembrane and coiled-coil domain family 3	Other	other	Common_Between_RNAseq_&_Microarray
G12267	Ccdc41	7	35838379..35911635	73257	6.10129	6.25134	6.3954	6.21111	6.17383	5.95745	6.24934	0.147064	6.11413	0.136962	CCDC41	coiled-coil domain containing 41	Extracellular Space	other	Common_Between_RNAseq_&_Microarray
G12268	Plxnc1	7	complement(35914416..36063727)	149312	4.99027	5.21383	4.65563	4.75089	4.52205	4.41124	4.95324	0.280935	4.5614	0.17321	PLXNC1	plexin C1	Plasma Membrane	transmembrane receptor	Common_Between_RNAseq_&_Microarray
G12272	Socs2	7	complement(36558017..36560623)	2607	3	3.16575	3	3	3	3	3.05525	0.0956951	3	0	SOCS2	suppressor of cytokine signaling 2	Cytoplasm	other	RNAseq_Specific
G12273	Mrpl42	7	complement(36638838..36661936)	23099	4.59246	4.62588	4.95369	4.88943	4.93183	4.76524	4.72401	0.199609	4.86216	0.0865757	MRPL42	mitochondrial ribosomal protein L42	Cytoplasm	other	Common_Between_RNAseq_&_Microarray
G12274	Nudt4	7	complement(36695609..36711834)	16226	4.08511	4.06452	4.0216	4.30541	4.50977	4.45825	4.05708	0.0324026	4.42448	0.106284	NUDT4	nudix (nucleoside diphosphate linked moiety X)-type motif 4	Cytoplasm	phosphatase	Common_Between_RNAseq_&_Microarray
G12278	Eea1	7	37144349..37233282	88934	3.58641	3.6418	3.72704	4.11463	3.97002	3.94729	3.65175	0.0708404	4.01065	0.0907624	EEA1	early endosome antigen 1	Cytoplasm	other	RNAseq_Specific
G12280	Btg1	7	37858321..37860578	2258	4.88238	4.78615	5.0081	4.80614	5.22216	5.01078	4.89221	0.111303	5.01303	0.20802	BTG1	B-cell translocation gene 1, anti-proliferative	Nucleus	transcription regulator	Common_Between_RNAseq_&_Microarray
G12284	Dcn	7	38783714..38823738	40025	3.58401	3.48137	3.08985	3.15043	3.17377	3.4147	3.38508	0.260773	3.2463	0.146305	DCN	decorin	Extracellular Space	other	Common_Between_RNAseq_&_Microarray
G12289	Tmtc3	7	complement(40209728..40256099)	46372	3	3	3	3.11338	3.15853	3.1349	3	0	3.1356	0.0225816	TMTC3	transmembrane and tetratricopeptide repeat containing 3	Other	other	Common_Between_RNAseq_&_Microarray
G12291	RGD1307947	7	complement(40343617..40354037)	10421	4.37547	4.31555	4.4274	4.26996	4.42573	4.1349	4.37281	0.0559723	4.27686	0.145541	C12orf29	chromosome 12 open reading frame 29	Other	other	RNAseq_Specific
G12295	Atp2b1	7	41154017..41259749	105733	3.85718	3.86017	3.74385	4.2451	4.14146	4.24661	3.8204	0.0663142	4.21106	0.060278	ATP2B1	ATPase, Ca++ transporting, plasma membrane 1	Plasma Membrane	transporter	Common_Between_RNAseq_&_Microarray
G12297	Dusp6	7	41506397..41510626	4230	3	3	3	3.39627	3.22862	3.53889	3	0	3.38793	0.155302	DUSP6	dual specificity phosphatase 6	Cytoplasm	phosphatase	Common_Between_RNAseq_&_Microarray
G12298	Kitlg	7	42337401..42383921	46521	3	3.02749	3	3.27033	3.04333	3.25304	3.00916	0.0158697	3.1889	0.126366	KITLG	KIT ligand	Extracellular Space	growth factor	Common_Between_RNAseq_&_Microarray
G123	ENSRNOG00000033517	1	21603257..21604069	813	5.62205	5.74497	5.96855	3	6.09244	5.86901	5.77852	0.17567	4.98715	1.72454	LOC100360791	tumor protein, translationally-controlled 1	Other	other	RNAseq_Specific
G12307	Slc6a15	7	45349000..45402668	53669	5.71383	5.81737	5.66718	5.97922	5.74927	5.86356	5.73279	0.0768678	5.86402	0.114979	SLC6A15	solute carrier family 6 (neutral amino acid transporter), member 15	Plasma Membrane	transporter	Common_Between_RNAseq_&_Microarray
G12309	Tmtc2	7	complement(47197649..47603261)	405613	3	3	3	3.42346	3.09832	3.32892	3	0	3.28357	0.167243	TMTC2	transmembrane and tetratricopeptide repeat containing 2	Cytoplasm	other	RNAseq_Specific
G1231	Fv1	1	101289512..101291836	2325	5.88984	5.83238	5.80697	5.53434	5.644	5.62483	5.84306	0.0424555	5.60106	0.0585672	2410002F23Rik	RIKEN cDNA 2410002F23 gene	Other	other	Common_Between_RNAseq_&_Microarray
G12311	Ccdc59	7	47942423..47948975	6553	3.7641	3.89251	3.94451	3.8152	3.94405	3.80695	3.86704	0.0928624	3.8554	0.0768809	CCDC59	coiled-coil domain containing 59	Other	other	RNAseq_Specific
G12312	Ppfia2	7	48882184..49058116	175933	4.38863	4.52956	4.47261	4.64443	4.499	4.5494	4.4636	0.070896	4.56428	0.0738463	PPFIA2	protein tyrosine phosphatase, receptor type, f polypeptide (PTPRF), interacting protein (liprin), alpha 2	Plasma Membrane	phosphatase	RNAseq_Specific
G12319	Syt1	7	complement(50097034..50650569)	553536	4.51134	4.76471	4.34561	4.7562	4.39724	4.57683	4.54055	0.211073	4.57676	0.179479	SYT1	synaptotagmin I	Cytoplasm	transporter	RNAseq_Specific
G12323	Ppp1r12a	7	complement(51419607..51527799)	108193	3.84161	3.90601	3.87493	4.31699	4.09192	4.13326	3.87418	0.0322022	4.18073	0.119805	PPP1R12A	protein phosphatase 1, regulatory subunit 12A	Cytoplasm	phosphatase	Common_Between_RNAseq_&_Microarray
G12329	Csrp2	7	53641861..53660495	18635	5.71493	5.66846	5.94392	5.81134	6.07969	5.52904	5.77577	0.147466	5.80669	0.275356	CSRP2	cysteine and glycine-rich protein 2	Nucleus	other	Common_Between_RNAseq_&_Microarray
G12330	Zdhhc17	7	complement(53664302..53726422)	62121	4.38794	4.2992	4.18414	4.24358	4.04804	3.96033	4.29043	0.102181	4.08399	0.145005	ZDHHC17	zinc finger, DHHC-type containing 17	Cytoplasm	enzyme	RNAseq_Specific
G12334	Bbs10	7	54041088..54044111	3024	3.21235	3.31812	3.2317	3.01417	3.15853	3.03807	3.25406	0.0563164	3.07025	0.0773767	BBS10	Bardet-Biedl syndrome 10	Other	other	RNAseq_Specific
G12335	Nap1l1	7	54238052..54261360	23309	6.903	6.82362	6.79292	6.90166	6.79064	6.74967	6.83985	0.0568055	6.81399	0.0786423	NAP1L1	nucleosome assembly protein 1-like 1	Nucleus	other	Common_Between_RNAseq_&_Microarray
G12336	Phlda1	7	54272090..54274294	2205	3	3	3	3	3	3.09071	3	0	3.03024	0.0523716	PHLDA1	pleckstrin homology-like domain, family A, member 1	Cytoplasm	other	RNAseq_Specific
G12337	Krr1	7	54780329..54791757	11429	3.56039	3.50567	3.61491	3.42143	3.48716	3.37693	3.56032	0.0546206	3.42851	0.0554553	KRR1	KRR1, small subunit (SSU) processome component, homolog (yeast)	Nucleus	other	RNAseq_Specific
G1234	Shank1	1	101362263..101409488	47226	3.71391	3.77524	3.67034	3.70235	3.5126	3.55734	3.71983	0.0527016	3.59076	0.0991891	SHANK1	SH3 and multiple ankyrin repeat domains 1	Cytoplasm	other	Common_Between_RNAseq_&_Microarray
G12343	Kcnc2	7	54999433..55177445	178013	4.87968	4.89721	4.97726	5.17702	5.06638	5.10322	4.91805	0.052022	5.11554	0.0563419	KCNC2	potassium voltage-gated channel, Shaw-related subfamily, member 2	Plasma Membrane	ion channel	Common_Between_RNAseq_&_Microarray
G12344	Atxn7l3b	7	complement(55624344..55624637)	294	4.42673	4.851	3.90889	4.64155	4.15732	4.41631	4.39554	0.471829	4.40506	0.24231	ATXN7L3B	ataxin 7-like 3B	Other	other	Common_Between_RNAseq_&_Microarray
G12351	Tbc1d15	7	complement(58174019..58228638)	54620	5.04792	5.10594	5.08716	5.30497	5.18874	5.1228	5.08034	0.029608	5.2055	0.092233	TBC1D15	TBC1 domain family, member 15	Cytoplasm	other	Common_Between_RNAseq_&_Microarray
G12352	Rab21	7	complement(58270894..58295672)	24779	5.77951	5.84549	5.84787	6.01178	5.96821	6.00484	5.82429	0.038795	5.99494	0.0234117	RAB21	RAB21, member RAS oncogene family	Cytoplasm	enzyme	Common_Between_RNAseq_&_Microarray
G12353	Tmem19	7	complement(58325486..58352039)	26554	4.72194	4.76022	4.74875	4.79502	4.88748	4.93658	4.74363	0.0196444	4.87302	0.0718779	TMEM19	transmembrane protein 19	Other	other	Common_Between_RNAseq_&_Microarray
G12354	Thap2	7	complement(58363484..58374215)	10732	3	3.09409	3	3	3	3	3.03136	0.054325	3	0	THAP2	THAP domain containing, apoptosis associated protein 2	Nucleus	other	RNAseq_Specific
G12355	Zfc3h1	7	58375094..58436158	61065	4.06105	4.12667	4.28297	4.37687	4.35585	4.29847	4.1569	0.114006	4.34373	0.0405828	ZFC3H1	zinc finger, C3H1-type containing	Other	other	Common_Between_RNAseq_&_Microarray
G1236	Syt3	1	101459652..101473304	13653	4.89554	4.73822	4.71264	4.57106	4.67899	4.71731	4.78213	0.0990419	4.65579	0.0758344	SYT3	synaptotagmin III	Cytoplasm	transporter	Common_Between_RNAseq_&_Microarray
G12360	Ptprr	7	59041711..59335373	293663	5.52356	5.74039	5.52732	5.72887	5.65978	5.79181	5.59709	0.124114	5.72682	0.0660388	PTPRR	protein tyrosine phosphatase, receptor type, R	Plasma Membrane	phosphatase	Common_Between_RNAseq_&_Microarray
G12363	Kcnmb4	7	complement(59472015..59526626)	54612	7.57941	7.63582	7.55022	6.71142	6.80374	6.50207	7.58848	0.0435132	6.67241	0.154572	KCNMB4	potassium large conductance calcium-activated channel, subfamily M, beta member 4	Plasma Membrane	ion channel	Common_Between_RNAseq_&_Microarray
G12364	Cnot2	7	complement(59542042..59598859)	56818	5.07133	5.01704	5.06982	5.04966	5.0442	4.78955	5.05273	0.0309179	4.96114	0.148626	CNOT2	CCR4-NOT transcription complex, subunit 2	Nucleus	transcription regulator	Common_Between_RNAseq_&_Microarray
G12365	ENSRNOG00000005316	7	complement(59647425..59648698)	1274	4.97199	4.85049	5.19189	5.37013	5.47002	5.57531	5.00479	0.173049	5.47182	0.102605
G12366	Rpl12	7	complement(59772308..59773033)	726	3	3	3.71774	3	3.15043	3	3.23925	0.414386	3.05014	0.0868496	RPL12	ribosomal protein L12	Cytoplasm	other	Common_Between_RNAseq_&_Microarray
G12369	Rab3ip	7	complement(59933272..59962078)	28807	3.68056	3.90311	3.85216	3.74277	3.87788	3.86017	3.81194	0.116602	3.82694	0.0734306	RAB3IP	RAB3A interacting protein	Cytoplasm	other	RNAseq_Specific
G1237	Lrrc4b	1	101516007..101533767	17761	5.80993	5.72151	5.45711	5.22428	5.03213	5.16462	5.66285	0.183576	5.14034	0.0983482	LRRC4B	leucine rich repeat containing 4B	Other	other	Common_Between_RNAseq_&_Microarray
G12374	Cct2	7	complement(60110076..60122818)	12743	7.28155	7.36498	7.35875	7.25372	7.23427	7.2465	7.3351	0.0464734	7.24483	0.00983286	CCT2	chaperonin containing TCP1, subunit 2 (beta)	Cytoplasm	kinase	Common_Between_RNAseq_&_Microarray
G12375	Frs2	7	complement(60128597..60210278)	81682	3.01683	3.18408	3.11505	3.23708	3.24013	3.13325	3.10532	0.08405	3.20349	0.0608437	FRS2	fibroblast growth factor receptor substrate 2	Plasma Membrane	other	Common_Between_RNAseq_&_Microarray
G12376	Yeats4	7	complement(60289460..60296600)	7141	5.10028	5.06031	5.31644	4.95601	5.221	5.19189	5.15901	0.137797	5.12297	0.145324	YEATS4	YEATS domain containing 4	Nucleus	transcription regulator	Common_Between_RNAseq_&_Microarray
G12379	Lyz2	7	complement(60337951..60343246)	5296	3.53267	3.70783	3.99107	3.77208	3.95335	3.87345	3.74386	0.231314	3.86629	0.090849	Lyz1/Lyz2	lysozyme 2	Cytoplasm	enzyme	Common_Between_RNAseq_&_Microarray
G12380	Cpsf6	7	complement(60387688..60418950)	31263	4.32168	4.48845	4.46903	4.58588	4.45166	4.31916	4.42639	0.0911963	4.45223	0.133359	CPSF6	cleavage and polyadenylation specific factor 6, 68kDa	Nucleus	other	Common_Between_RNAseq_&_Microarray
G12382	Mdm2	7	complement(60719029..60743291)	24263	4.11087	4.2852	4.33277	4.54479	4.61913	4.52614	4.24295	0.116831	4.56335	0.0491949	MDM2	MDM2 oncogene, E3 ubiquitin protein ligase	Nucleus	transcription regulator	Common_Between_RNAseq_&_Microarray
G12383	Slc35e3	7	complement(60765042..60778112)	13071	4.99027	5.07133	4.96067	5.28715	5.33141	5.34209	5.00742	0.0572917	5.32022	0.0291331	SLC35E3	solute carrier family 35, member E3	Other	other	Common_Between_RNAseq_&_Microarray
G12384	Nup107	7	complement(60781692..60825205)	43514	3.35315	3.23554	3.23016	3.2636	3.28889	3.19283	3.27295	0.0695042	3.24844	0.0497944	NUP107	nucleoporin 107kDa	Nucleus	transporter	Common_Between_RNAseq_&_Microarray
G12385	Rap1b	7	complement(60851045..60860980)	9936	5.86839	5.99457	5.93499	6.54032	6.55321	6.62971	5.93265	0.0631242	6.57441	0.0483208	RAP1B	RAP1B, member of RAS oncogene family	Cytoplasm	enzyme	Common_Between_RNAseq_&_Microarray
G12388	Mdm1	7	61171143..61197122	25980	3.49928	3.32604	3.41266	3	3	3	3.41266	0.0866179	3	0	MDM1	Mdm1 nuclear protein homolog (mouse)	Other	other	RNAseq_Specific
G1239	Josd2	1	101539030..101542738	3709	4.43611	4.44473	4.4227	4.28223	4.41865	4.55553	4.43451	0.0111021	4.4188	0.136648	JOSD2	Josephin domain containing 2	Other	enzyme	Common_Between_RNAseq_&_Microarray
G12391	Dyrk2	7	complement(61776788..61789208)	12421	3	3	3	3	3.11505	3.08049	3	0	3.06518	0.0590327	DYRK2	dual-specificity tyrosine-(Y)-phosphorylation regulated kinase 2	Cytoplasm	kinase	Common_Between_RNAseq_&_Microarray
G12392	Cand1	7	complement(62113404..62151495)	38092	5.20917	5.26276	5.08951	5.70321	5.49697	5.49457	5.18715	0.0887011	5.56491	0.119773	CAND1	cullin-associated and neddylation-dissociated 1	Cytoplasm	transcription regulator	Common_Between_RNAseq_&_Microarray
G12396	Msrb3	7	complement(62838801..62932103)	93303	4.09277	4.13326	4.16536	4.03485	4.22866	4.03705	4.13047	0.0363794	4.10019	0.111265	Msrb3	methionine sulfoxide reductase B3	Cytoplasm	other	RNAseq_Specific
G12398	Lemd3	7	complement(62979066..63028458)	49393	3.08646	3.1999	3.08476	3.49993	3.34248	3.44016	3.1237	0.0659906	3.42752	0.0794797	LEMD3	LEM domain containing 3	Nucleus	other	Common_Between_RNAseq_&_Microarray
G1240	Emc10	1	complement(101560506..101566824)	6319	6.07306	6.17303	6.00169	6.05723	6.1206	6.25767	6.08259	0.0860669	6.14517	0.102452	EMC10	ER membrane protein complex subunit 10	Other	other	Common_Between_RNAseq_&_Microarray
G12400	WIF1	7	63077688..63147645	69958	3.00433	3.0633	3.11589	3	3	3	3.06117	0.0558141	3	0	WIF1	WNT inhibitory factor 1	Extracellular Space	other	RNAseq_Specific
G12401	Parvb	7	63181011..63267688	86678	4.52832	4.65563	4.44276	4.94738	4.49262	4.7671	4.54224	0.107116	4.7357	0.229	PARVB	parvin, beta	Cytoplasm	other	Common_Between_RNAseq_&_Microarray
G12405	Tbc1d30	7	complement(63585586..63631131)	45546	3.09071	3.11005	3	3.04682	3.10837	3	3.06692	0.0587539	3.05173	0.054353	TBC1D30	TBC1 domain family, member 30	Cytoplasm	other	RNAseq_Specific
G12406	GNS	7	63691030..63722905	31876	3.73629	3.26135	4.97979	5.11055	4.87527	5.17064	3.99248	0.887401	5.05215	0.156105	GNS	glucosamine (N-acetyl)-6-sulfatase	Cytoplasm	enzyme	Common_Between_RNAseq_&_Microarray
G12407	Rassf3	7	complement(63737800..63801753)	63954	3	3	3	3	3	3.00792	3	0	3.00264	0.00457161	RASSF3	Ras association (RalGDS/AF-6) domain family member 3	Other	other	Common_Between_RNAseq_&_Microarray
G12408	Tbk1	7	complement(63877567..63910298)	32732	4.70244	4.78719	4.85373	5.02394	4.97726	4.92403	4.78112	0.0758241	4.97508	0.049988	TBK1	TANK-binding kinase 1	Cytoplasm	kinase	Common_Between_RNAseq_&_Microarray
G12409	Xpot	7	complement(63912373..63951227)	38855	4.60524	4.70465	4.48619	4.98732	4.85373	4.87257	4.59869	0.109376	4.90454	0.0723083	Xpot	exportin, tRNA	Other	other	Common_Between_RNAseq_&_Microarray
G1241	Fam71e1	1	101567063..101571409	4347	3.99377	3.99693	3.95895	3.44216	3.45272	3.31087	3.98322	0.0210723	3.40192	0.0790279	FAM71E1	family with sequence similarity 71, member E1	Other	other	RNAseq_Specific
G12411	RGD1565498	7	64146261..64159524	13264	3	3	3	3	3.00253	3.06503	3	0	3.02252	0.0368348	RGD1565498	similar to Hypothetical protein LOC270802	Other	other	RNAseq_Specific
G12415	Tmem5	7	complement(64550353..64562127)	11775	3.52519	3.6255	3.70508	3.83504	3.93363	3.98243	3.61859	0.0901435	3.91704	0.075082	TMEM5	transmembrane protein 5	Plasma Membrane	other	Common_Between_RNAseq_&_Microarray
G12417	Grip1	7	64890318..65081385	191068	3.64984	3.76785	3.82596	3.56161	3.59063	3.50248	3.74788	0.0897393	3.55157	0.0449242	GRIP1	glutamate receptor interacting protein 1	Plasma Membrane	transcription regulator	RNAseq_Specific
G12421	Tmbim4	7	65206720..65221307	14588	5.23372	5.24993	5.37517	5.64241	5.72151	5.73444	5.28627	0.077413	5.69945	0.0498205	TMBIM4	transmembrane BAX inhibitor motif containing 4	Nucleus	other	Common_Between_RNAseq_&_Microarray
G12426	Gns	7	65824339..65858941	34603	5.23621	5.296	3	4.16174	4.0176	3.7641	4.51074	1.30868	3.98115	0.20131	GNS	glucosamine (N-acetyl)-6-sulfatase	Cytoplasm	enzyme	Common_Between_RNAseq_&_Microarray
G12430	Usp15	7	66793581..66884024	90444	3.73301	3.85519	3.64869	4.11213	3.94964	4.04103	3.74563	0.103826	4.03427	0.081453	USP15	ubiquitin specific peptidase 15	Cytoplasm	peptidase	RNAseq_Specific
G12431	Mon2	7	66915094..66990456	75363	4.48555	4.50757	4.36181	4.60169	4.6212	4.51922	4.45164	0.0785724	4.5807	0.0541323	MON2	MON2 homolog (S. cerevisiae)	Cytoplasm	other	RNAseq_Specific
G12433	Ppm1h	7	complement(67042623..67310367)	267745	3.45536	3.37902	3.29184	3.78521	3.71937	3.71883	3.37541	0.081818	3.74114	0.0381682	PPM1H	protein phosphatase, Mg2+/Mn2+ dependent, 1H	Other	phosphatase	RNAseq_Specific
G12445	Xrcc6bp1	7	complement(70360825..70375828)	15004	3	3.06678	3.16575	3	3	3	3.07751	0.0833939	3	0	XRCC6BP1	XRCC6 binding protein 1	Other	kinase	RNAseq_Specific
G12446	Ctdsp2	7	70460050..70464817	4768	4.18254	4.11379	3.96126	3.76464	3.47623	3.74008	4.08587	0.113255	3.66032	0.159895	Ctdsp2	CTD (carboxy-terminal domain, RNA polymerase II, polypeptide A) small phosphatase 2	Other	phosphatase	Common_Between_RNAseq_&_Microarray
G12448	Avil	7	70468814..70486801	17988	3	3	3	3.0924	3.20926	3.14309	3	0	3.14825	0.0586013	Avil	advillin	Plasma Membrane	other	RNAseq_Specific
G12449	Tsfm	7	complement(70489452..70495163)	5712	3.99467	4.37722	4.23748	4.2451	4.19285	4.17615	4.20312	0.193574	4.2047	0.0359729	Tsfm	Ts translation elongation factor, mitochondrial	Other	other	Common_Between_RNAseq_&_Microarray
G1245	Nr1h2	1	complement(101619967..101625287)	5321	4.03705	4.04453	4.02558	3.97462	3.99963	4.11379	4.03572	0.00954604	4.02935	0.0741927	NR1H2	nuclear receptor subfamily 1, group H, member 2	Nucleus	ligand-dependent nuclear receptor	Common_Between_RNAseq_&_Microarray
G12451	Mettl1	7	70506428..70509927	3500	4.30395	4.36323	4.12626	4.04103	4.17576	4.28889	4.26448	0.123314	4.16856	0.124086	Mettl1	methyltransferase like 1	Other	enzyme	RNAseq_Specific
G12453	March9	7	complement(70520711..70522791)	2081	4.28889	4.15974	4.25077	4.23441	4.32813	4.38138	4.23313	0.0663596	4.31464	0.0744083	MARCH9	membrane-associated ring finger (C3HC4) 9	Cytoplasm	other	RNAseq_Specific
G12454	Cdk4	7	70527541..70530390	2850	5.90183	5.72315	5.81365	5.51759	5.64472	5.68046	5.81288	0.0893439	5.61426	0.0856037	Cdk4	cyclin-dependent kinase 4	Nucleus	kinase	Common_Between_RNAseq_&_Microarray
G12455	Tspan31	7	complement(70530384..70533257)	2874	4.96367	4.9006	5.05097	5.29047	5.33533	5.33497	4.97175	0.0755082	5.32026	0.0257985	TSPAN31	tetraspanin 31	Plasma Membrane	other	Common_Between_RNAseq_&_Microarray
G12456	Agap2	7	70542515..70555124	12610	3.77208	3.91511	3.61846	3.11756	3.15205	3.20614	3.76855	0.148354	3.15858	0.0446512	AGAP2	ArfGAP with GTPase domain, ankyrin repeat and PH domain 2	Nucleus	enzyme	Common_Between_RNAseq_&_Microarray
G12457	Os9	7	complement(70558019..70584816)	26798	7.3967	7.40643	7.3185	7.18327	7.13906	7.25677	7.37388	0.0482029	7.19303	0.0594615	OS9	osteosarcoma amplified 9, endoplasmic reticulum lectin	Nucleus	other	Common_Between_RNAseq_&_Microarray
G12459	B4galnt1	7	70630282..70637196	6915	4.52081	4.48877	4.44143	4.61266	4.74982	4.77002	4.48367	0.0399354	4.71083	0.0856154	B4GALNT1	beta-1,4-N-acetyl-galactosaminyl transferase 1	Cytoplasm	enzyme	RNAseq_Specific
G12461	Arhgef25	7	complement(70646953..70653981)	7029	4.75647	4.62762	4.54294	4.24965	4.21205	4.0654	4.64234	0.107528	4.1757	0.0973545	ARHGEF25	Rho guanine nucleotide exchange factor (GEF) 25	Cytoplasm	other	Common_Between_RNAseq_&_Microarray
G12462	Dtx3	7	complement(70654776..70659437)	4662	6.20153	6.1206	6.05582	5.65463	5.59872	5.74362	6.12599	0.0730046	5.66566	0.0730763	DTX3	deltex homolog 3 (Drosophila)	Cytoplasm	other	RNAseq_Specific
G12463	Pip4k2c	7	complement(70661195..70676538)	15344	4.01312	4.05196	3.96033	4.22289	4.23863	4.18573	4.00847	0.0459889	4.21575	0.0271623	PIP4K2C	phosphatidylinositol-5-phosphate 4-kinase, type II, gamma	Cytoplasm	kinase	Common_Between_RNAseq_&_Microarray
G12464	Kif5a	7	complement(70690905..70727087)	36183	6.93325	6.88111	6.64918	7.25843	7.08887	7.13439	6.82118	0.151218	7.16056	0.0877574	KIF5A	kinesin family member 5A	Cytoplasm	transporter	Common_Between_RNAseq_&_Microarray
G12465	Dctn2	7	70730174..70745437	15264	7.03439	6.94195	7.00256	7.11911	7.12253	7.16291	6.99297	0.0469636	7.13485	0.0243602	DCTN2	dynactin 2 (p50)	Cytoplasm	other	Common_Between_RNAseq_&_Microarray
G12466	Mbd6	7	complement(70745585..70751297)	5713	3.2651	3.12831	3.45206	3.61964	3.34532	3.77681	3.28182	0.162519	3.58059	0.218377	MBD6	methyl-CpG binding domain protein 6	Nucleus	other	Common_Between_RNAseq_&_Microarray
G12467	DDIT3	7	70754398..70759220	4823	5.34316	5.21149	5.45251	6.01725	6.0568	6.21033	5.33572	0.120681	6.09479	0.101992	DDIT3	DNA-damage-inducible transcript 3	Nucleus	transcription regulator	Common_Between_RNAseq_&_Microarray
G12468	Mars	7	complement(70759159..70776456)	17298	6.03716	6.04592	6.09244	6.47573	6.38818	6.52239	6.05851	0.0297095	6.4621	0.0681308	MARS	methionyl-tRNA synthetase	Cytoplasm	enzyme	Common_Between_RNAseq_&_Microarray
G12473	R3hdm2	7	70870219..70978626	108408	5.21751	5.18874	5.17064	5.2465	5.11118	5.27323	5.19229	0.023637	5.2103	0.0868777	R3HDM2	R3H domain containing 2	Nucleus	other	RNAseq_Specific
G12475	Ndufa4l2	7	70995344..70996777	1434	3	3.18408	3	3.10167	3.31522	3.2386	3.06136	0.106281	3.2185	0.108189	NDUFA4L2	NADH dehydrogenase (ubiquinone) 1 alpha subcomplex, 4-like 2	Other	enzyme	RNAseq_Specific
G12476	Shmt2	7	complement(70998104..71003174)	5071	4.82352	4.53362	4.78034	6.1104	5.90869	6.45195	4.71249	0.156407	6.15702	0.274613	SHMT2	serine hydroxymethyltransferase 2 (mitochondrial)	Cytoplasm	enzyme	Common_Between_RNAseq_&_Microarray
G12478	Lrp1	7	complement(71018808..71099367)	80560	5.44359	5.32223	5.06313	5.06768	4.79864	4.85893	5.27632	0.19434	4.90842	0.141177	LRP1	low density lipoprotein receptor-related protein 1	Plasma Membrane	transmembrane receptor	Common_Between_RNAseq_&_Microarray
G12479	Stat6	7	71118725..71135848	17124	3	3	3	3.01238	3	3.3644	3	0	3.12559	0.206904	STAT6	signal transducer and activator of transcription 6, interleukin-4 induced	Nucleus	transcription regulator	RNAseq_Specific
G1248	Myh14	1	complement(101674362..101737053)	62692	3.09998	3	3	3.0659	3.03982	3.05638	3.03333	0.0577254	3.05403	0.0131974	MYH14	myosin, heavy chain 14, non-muscle	Extracellular Space	other	Common_Between_RNAseq_&_Microarray
G12492	Uqcrb	7	complement(71436514..71441869)	5356	5.61294	5.54117	5.71438	5.35346	5.53434	5.38436	5.62283	0.0870255	5.42405	0.0967523	UQCRB	ubiquinol-cytochrome c reductase binding protein	Cytoplasm	enzyme	RNAseq_Specific
G12493	Mterfd1	7	complement(71447418..71465651)	18234	4.32706	4.26322	4.44773	4.41799	4.53236	4.4497	4.346	0.0937035	4.46668	0.059049	MTERFD1	MTERF domain containing 1	Cytoplasm	other	Common_Between_RNAseq_&_Microarray
G12495	Ptdss1	7	71466006..71525416	59411	6.84039	6.79688	6.55405	6.73003	6.54032	6.66278	6.73044	0.154298	6.64437	0.0961835	PTDSS1	phosphatidylserine synthase 1	Cytoplasm	enzyme	Common_Between_RNAseq_&_Microarray
G12499	Sdc2	7	71743813..71857533	113721	5.98709	5.98105	6.04494	6.32093	6.01625	6.27305	6.00436	0.0352714	6.20341	0.163845	SDC2	syndecan 2	Plasma Membrane	other	Common_Between_RNAseq_&_Microarray
G12501	Cpq	7	71880824..72338526	457703	5.07091	4.96507	5.08502	5.03391	5.06335	5.06313	5.04033	0.0655642	5.05346	0.0169359	CPQ	carboxypeptidase Q	Extracellular Space	peptidase	Common_Between_RNAseq_&_Microarray
G12507	Mtdh	7	72939139..72994607	55469	3.67089	3.81265	3.65957	4.21205	3.86904	3.99829	3.71437	0.0852995	4.02646	0.173232	MTDH	metadherin	Cytoplasm	transcription regulator	Common_Between_RNAseq_&_Microarray
G12508	Laptm4b	7	73094975..73138156	43182	4.74254	4.77373	4.73661	4.64761	4.54664	4.54294	4.75096	0.0199404	4.57906	0.0593947	LAPTM4B	lysosomal protein transmembrane 4 beta	Other	other	Common_Between_RNAseq_&_Microarray
G12509	Matn2	7	73174202..73376715	202514	4.72846	4.67729	4.86141	5.0186	4.89721	4.92878	4.75572	0.0950374	4.9482	0.0629784	MATN2	matrilin 2	Extracellular Space	other	Common_Between_RNAseq_&_Microarray
G12511	Rpl30	7	complement(73381072..73383965)	2894	8.3659	7.91942	8.06384	7.66819	8.54901	8.38219	8.11639	0.22783	8.1998	0.467879	RPL30	ribosomal protein L30	Cytoplasm	other	Common_Between_RNAseq_&_Microarray
G12514	Hrsp12	7	complement(73422767..73436388)	13622	5.37777	5.15552	5.47181	4.95228	5.22621	5.00475	5.33503	0.162417	5.06108	0.145395	HRSP12	heat-responsive protein 12	Cytoplasm	other	Common_Between_RNAseq_&_Microarray
G12516	Nipal2	7	complement(73513633..73624863)	111231	3.30722	3.39354	3.49034	3.45272	3.68056	3.68619	3.39703	0.0916128	3.60649	0.133197	NIPAL2	NIPA-like domain containing 2	Other	other	Common_Between_RNAseq_&_Microarray
G1252	Vrk3	1	101820326..101847648	27323	4.62879	4.54479	4.54695	4.52332	4.57257	4.65563	4.57351	0.0478852	4.58384	0.0668698	VRK3	vaccinia related kinase 3	Nucleus	kinase	Common_Between_RNAseq_&_Microarray
G12520	Vps13b	7	74283881..74879193	595313	3.25304	3.33535	3.24396	3.08646	3.05553	3	3.27745	0.0503497	3.04733	0.043808	VPS13B	vacuolar protein sorting 13 homolog B (yeast)	Nucleus	transporter	Common_Between_RNAseq_&_Microarray
G12522	Cox6c	7	complement(74880039..74892526)	12488	8.05397	7.98246	8.24378	8.09669	8.09669	8.14613	8.0934	0.135048	8.11317	0.0285455	COX6C	cytochrome c oxidase subunit VIc	Cytoplasm	enzyme	Common_Between_RNAseq_&_Microarray
G12525	Polr2k	7	75138464..75141444	2981	5.80413	5.74362	5.83352	5.7658	6.16782	6.10654	5.79376	0.045839	6.01338	0.216596	Polr2k	polymerase (RNA) II (DNA directed) polypeptide K	Nucleus	other	Common_Between_RNAseq_&_Microarray
G12527	Rnf19a	7	complement(75206742..75246247)	39506	3.72486	3.72265	4.20776	4.64559	4.27631	4.30468	3.88509	0.279442	4.40886	0.205505	RNF19A	ring finger protein 19A, RBR E3 ubiquitin protein ligase	Nucleus	enzyme	Common_Between_RNAseq_&_Microarray
G12528	Ankrd46	7	complement(75427580..75436478)	8899	5.91217	5.92576	5.73335	6.00764	5.99015	5.8107	5.8571	0.107379	5.93616	0.109009	ANKRD46	ankyrin repeat domain 46	Nucleus	transcription regulator	Common_Between_RNAseq_&_Microarray
G1253	Atf5	1	complement(101872584..101876673)	4090	5.46839	5.45465	5.6932	7.05416	6.93577	7.19605	5.53875	0.13394	7.062	0.130316	ATF5	activating transcription factor 5	Nucleus	transcription regulator	Common_Between_RNAseq_&_Microarray
G12530	Pabpc1	7	complement(75557273..75570171)	12899	5.39433	5.52904	5.54551	6.05983	5.95327	6.14078	5.48962	0.0829391	6.05129	0.0940477	PABPC1	poly(A) binding protein, cytoplasmic 1	Cytoplasm	translation regulator	Common_Between_RNAseq_&_Microarray
G12532	YWHAZ	7	complement(75721286..75743714)	22429	8.53442	8.74142	8.44804	9.03427	9.02266	9.07265	8.57463	0.150769	9.04319	0.0261615	YWHAZ	tyrosine 3-monooxygenase/tryptophan 5-monooxygenase activation protein, zeta	Cytoplasm	enzyme	Common_Between_RNAseq_&_Microarray
G12533	Zfp706	7	complement(75948335..75948499)	165	3.38179	3.72049	3.03982	3.33963	3.80184	3.21702	3.3807	0.340335	3.45283	0.308405	Zfp706	zinc finger protein 706	Other	other	Common_Between_RNAseq_&_Microarray
G12538	Ncald	7	complement(76320074..76414625)	94552	5.60036	6.13062	5.67412	6.25927	5.94615	5.88655	5.8017	0.287232	6.03066	0.200217	NCALD	neurocalcin delta	Cytoplasm	other	Common_Between_RNAseq_&_Microarray
G1254	Nup62	1	101889514..101891781	2268	4.70271	4.58588	4.6209	4.92878	4.83921	5.05315	4.6365	0.0599605	4.94038	0.107441	NUP62	nucleoporin 62kDa	Nucleus	transporter	Common_Between_RNAseq_&_Microarray
G12540	Ubr5	7	complement(76906409..76975003)	68595	5.18599	5.29343	5.16402	5.26369	5.11076	5.09586	5.21448	0.0692484	5.15677	0.0928917	UBR5	ubiquitin protein ligase E3 component n-recognin 5	Nucleus	enzyme	Common_Between_RNAseq_&_Microarray
G12545	Klf10	7	complement(77258950..77265321)	6372	3.2977	3.21702	3	3.03455	3	3	3.17157	0.153964	3.01152	0.0199464	KLF10	Kruppel-like factor 10	Nucleus	transcription regulator	RNAseq_Specific
G12546	Azin1	7	complement(77448675..77475344)	26670	4.40986	4.5601	4.40783	5.52387	5.51665	5.58811	4.45926	0.0873362	5.54288	0.039343	AZIN1	antizyme inhibitor 1	Cytoplasm	enzyme	Common_Between_RNAseq_&_Microarray
G12549	Rims2	7	complement(77655910..78157335)	501426	3.85064	3.72922	3.86707	3.82696	3.73737	3.67431	3.81564	0.0752942	3.74621	0.0767039	RIMS2	regulating synaptic membrane exocytosis 2	Plasma Membrane	other	RNAseq_Specific
G12550	Dcaf13	7	complement(78209281..78244263)	34983	4.57471	4.62646	4.87306	4.8105	4.91811	4.7732	4.69141	0.159425	4.83394	0.0752455	DCAF13	DDB1 and CUL4 associated factor 13	Nucleus	other	Common_Between_RNAseq_&_Microarray
G12552	Slc25a32	7	78244520..78262013	17494	3	3	3	3.31812	3.34321	3.26734	3	0	3.30955	0.0386529	SLC25A32	solute carrier family 25 (mitochondrial folate carrier), member 32	Cytoplasm	transporter	RNAseq_Specific
G12553	Cthrc1	7	complement(78271770..78282052)	10283	3.473	3.34176	3.53889	3.80287	3.93933	4.00278	3.45121	0.100354	3.91499	0.102152	CTHRC1	collagen triple helix repeat containing 1	Extracellular Space	other	Common_Between_RNAseq_&_Microarray
G12554	Fzd6	7	complement(78317823..78349530)	31708	3	3	3	3.00433	3.07452	3.08646	3	0	3.0551	0.0443752	FZD6	frizzled family receptor 6	Plasma Membrane	G-protein coupled receptor	RNAseq_Specific
G12555	Baalc	7	complement(78416267..78489775)	73509	4.59215	4.49867	4.35444	4.78377	4.63925	4.70327	4.48176	0.119754	4.70876	0.0724175	BAALC	brain and acute leukemia, cytoplasmic	Cytoplasm	other	Common_Between_RNAseq_&_Microarray
G12556	Atp6v1c1	7	complement(78536556..78573997)	37442	7.61441	7.50235	7.56253	7.63233	7.55775	7.57246	7.55976	0.056078	7.58751	0.0395051	ATP6V1C1	ATPase, H+ transporting, lysosomal 42kDa, V1 subunit C1	Cytoplasm	transporter	Common_Between_RNAseq_&_Microarray
G12559	Dpys	7	complement(78796405..78873621)	77217	3.29037	3	3.00433	4.84696	4.05414	4.63169	3.09823	0.166408	4.51093	0.409973	DPYS	dihydropyrimidinase	Cytoplasm	enzyme	Common_Between_RNAseq_&_Microarray
G1256	Tbc1d17	1	complement(101901664..101909886)	8223	4.66846	4.63169	4.62995	4.57471	4.62267	4.73036	4.64337	0.021747	4.64258	0.0797138	TBC1D17	TBC1 domain family, member 17	Other	other	RNAseq_Specific
G12560	Lrp12	7	complement(78885444..78956523)	71080	4.12043	4.13695	4.09869	4.32813	4.28556	4.44904	4.11869	0.019192	4.35424	0.0848108	LRP12	low density lipoprotein receptor-related protein 12	Plasma Membrane	transmembrane receptor	Common_Between_RNAseq_&_Microarray
G12565	Oxr1	7	80737304..80812054	74751	5.90713	5.99593	5.93404	6.9581	6.70058	6.87318	5.9457	0.0455338	6.84395	0.131227	OXR1	oxidation resistance 1	Cytoplasm	other	Common_Between_RNAseq_&_Microarray
G12569	Angpt1	7	complement(81368937..81618369)	249433	3.45732	3.67318	3.71774	3.4147	3.16898	3.01595	3.61608	0.139284	3.19988	0.201159	ANGPT1	angiopoietin 1	Extracellular Space	growth factor	RNAseq_Specific
G1257	Akt1s1	1	101913514..101916583	3070	5.11347	4.9323	5.02394	4.97818	5.03896	5.1259	5.02324	0.0905855	5.04768	0.0742474	AKT1S1	AKT1 substrate 1 (proline-rich)	Cytoplasm	other	Common_Between_RNAseq_&_Microarray
G12571	Emc2	7	82339014..82385900	46887	5.93534	5.9404	6.06533	5.72683	5.84122	5.69822	5.98036	0.0736304	5.75542	0.0756664	EMC2	ER membrane protein complex subunit 2	Nucleus	other	Common_Between_RNAseq_&_Microarray
G12574	Nudcd1	7	complement(83317601..83362537)	44937	3.19675	3.31596	3.11756	3.36999	3.33678	3.33963	3.21009	0.0998713	3.3488	0.0184058	NUDCD1	NudC domain containing 1	Other	other	RNAseq_Specific
G12575	Eny2	7	83362801..83371599	8799	5.07004	5.09944	5.11013	5.13536	5.10049	5.03391	5.0932	0.0207638	5.08992	0.0515466	ENY2	enhancer of yellow 2 homolog (Drosophila)	Nucleus	transcription regulator	Common_Between_RNAseq_&_Microarray
G12577	Ebag9	7	83579394..83597339	17946	4.41329	4.52488	4.59634	4.72466	4.72684	4.7562	4.5115	0.0922555	4.7359	0.0176147	EBAG9	estrogen receptor binding site associated, antigen, 9	Cytoplasm	other	Common_Between_RNAseq_&_Microarray
G12578	Sybu	7	complement(83615448..83685901)	70454	5.37708	5.42907	5.46953	5.328	5.32764	5.31572	5.42523	0.0463478	5.32379	0.00699098	SYBU	syntabulin (syntaxin-interacting)	Other	other	Common_Between_RNAseq_&_Microarray
G12579	ENSRNOG00000024507	7	83817592..83819264	1673	3.75771	4.04058	3.82494	4.08083	4.03091	3.90264	3.87441	0.147783	4.00479	0.0919204
G1258	Pnkp	1	101918528..101923538	5011	3.49675	3.60669	3.59959	3.39764	3.35807	3.44811	3.56768	0.0615304	3.40127	0.045132	PNKP	polynucleotide kinase 3'-phosphatase	Nucleus	kinase	RNAseq_Specific
G1259	Ptov1	1	complement(101923970..101930515)	6546	6.80426	6.7963	6.75856	6.28262	6.33557	6.44717	6.78637	0.024416	6.35512	0.0839951	PTOV1	prostate tumor overexpressed 1	Nucleus	other	Common_Between_RNAseq_&_Microarray
G12594	FAM49B	7	complement(91517912..91581982)	64071	5.07841	5.215	5.16944	5.43292	5.41797	5.32961	5.15428	0.0695445	5.3935	0.0558306	FAM49B	family with sequence similarity 49, member B	Extracellular Space	other	Common_Between_RNAseq_&_Microarray
G12595	Asap1	7	complement(91673052..91955738)	282687	3.91847	3.85966	3.715	4.14556	3.98105	4.06408	3.83104	0.104706	4.06356	0.0822532	ASAP1	ArfGAP with SH3 domain, ankyrin repeat and PH domain 1	Plasma Membrane	other	Common_Between_RNAseq_&_Microarray
G12598	Rad21	7	complement(92155547..92182749)	27203	5.16603	5.08481	5.04203	5.23793	5.14047	5.21693	5.09763	0.0629831	5.19844	0.0512939	RAD21	RAD21 homolog (S. pombe)	Nucleus	other	Common_Between_RNAseq_&_Microarray
G1260	Med25	1	complement(101939597..101952474)	12878	5.42555	5.22216	5.32836	4.74498	4.68294	4.72466	5.32536	0.101728	4.71753	0.0316264	MED25	mediator complex subunit 25	Nucleus	other	Common_Between_RNAseq_&_Microarray
G12603	Med30	7	92876548..92898051	21504	3.34248	3.32245	3.49419	3.3644	3.71554	3.4704	3.38637	0.093905	3.51678	0.180108	MED30	mediator complex subunit 30	Nucleus	transcription regulator	Common_Between_RNAseq_&_Microarray
G12604	Ext1	7	complement(93246664..93521815)	275152	3	3	3	3.35597	3.25985	3.2263	3	0	3.2807	0.0673038	EXT1	exostosin glycosyltransferase 1	Cytoplasm	enzyme	Common_Between_RNAseq_&_Microarray
G12605	Samd12	7	complement(93636142..93930039)	293898	3.30867	3.10502	3.49228	3.39008	3.4448	3.2108	3.30199	0.193714	3.34856	0.1224	SAMD12	sterile alpha motif domain containing 12	Other	other	RNAseq_Specific
G12608	Tnfrsf11b	7	complement(94436613..94464618)	28006	3.39627	3.88812	4.10376	4.23557	4.09912	4.66761	3.79605	0.362621	4.3341	0.29678	TNFRSF11B	tumor necrosis factor receptor superfamily, member 11b	Plasma Membrane	transmembrane receptor	Common_Between_RNAseq_&_Microarray
G1261	Fuz	1	101956485..101961425	4941	4.65306	4.44937	4.77849	3.84563	3.89396	3.76891	4.62697	0.166108	3.83617	0.0630607	FUZ	fuzzy planar cell polarity protein	Plasma Membrane	other	RNAseq_Specific
G12610	Mal2	7	94768727..94801520	32794	3.92796	4.11296	3.90601	4.48684	4.41192	4.61589	3.98231	0.11368	4.50488	0.103173	MAL2	mal, T-cell differentiation protein 2 (gene/pseudogene)	Plasma Membrane	transporter	Common_Between_RNAseq_&_Microarray
G12613	Enpp2	7	complement(95120407..95180901)	60495	3.47753	3.66638	3.55549	3.54566	3.5126	3.44216	3.56647	0.0949032	3.50014	0.0528648	ENPP2	ectonucleotide pyrophosphatase/phosphodiesterase 2	Plasma Membrane	enzyme	Common_Between_RNAseq_&_Microarray
G12614	Taf2	7	complement(95339750..95396754)	57005	3.78365	3.77208	3.85318	3.92467	3.87198	3.88764	3.80297	0.0438647	3.89476	0.0270551	TAF2	TAF2 RNA polymerase II, TATA box binding protein (TBP)-associated factor, 150kDa	Nucleus	transcription regulator	Common_Between_RNAseq_&_Microarray
G1262	Ap2a1	1	complement(101961565..101990733)	29169	6.57493	6.4662	6.29802	6.50645	6.28262	6.35711	6.44638	0.139519	6.38206	0.113978	AP2A1	adaptor-related protein complex 2, alpha 1 subunit	Cytoplasm	transporter	RNAseq_Specific
G12620	Mrpl13	7	complement(95910454..95932053)	21600	5.70956	5.76367	5.95722	5.81365	6.00876	5.9241	5.81015	0.130205	5.9155	0.0978377	MRPL13	mitochondrial ribosomal protein L13	Cytoplasm	other	Common_Between_RNAseq_&_Microarray
G12628	Derl1	7	complement(98344208..98366882)	22675	5.6094	5.54272	5.4376	5.23563	5.24917	5.19802	5.52991	0.0866144	5.2276	0.0265033	DERL1	derlin 1	Cytoplasm	other	Common_Between_RNAseq_&_Microarray
G12630	Tbc1d31	7	98385290..98446226	60937	3.5314	3.54134	3.51703	3.37415	3.33249	3.16253	3.52992	0.0122225	3.28972	0.112105	TBC1D31	TBC1 domain family, member 31	Cytoplasm	other	RNAseq_Specific
G12634	Zhx1	7	complement(98521908..98550754)	28847	4.03485	4.05587	3.99153	3.92181	3.90361	3.85818	4.02742	0.0328079	3.89453	0.0327728	ZHX1	zinc fingers and homeoboxes 1	Nucleus	transcription regulator	Common_Between_RNAseq_&_Microarray
G12635	Wdyhv1	7	complement(98562311..98582049)	19739	3.60078	3.58943	3.81212	3.22088	3.13982	3	3.66744	0.125424	3.12023	0.111734	WDYHV1	WDYHV motif containing 1	Cytoplasm	other	Common_Between_RNAseq_&_Microarray
G1264	Cpt1c	1	complement(102019484..102034000)	14517	5.41137	5.24593	5.27136	4.92546	4.97266	4.87552	5.30956	0.0890895	4.92455	0.0485793	CPT1C	carnitine palmitoyltransferase 1C	Cytoplasm	enzyme	Common_Between_RNAseq_&_Microarray
G12640	Fam91a1	7	98904337..98942732	38396	5.06509	5.12259	4.92995	5.45777	5.24726	5.26257	5.03921	0.0988952	5.32253	0.117367	FAM91A1	family with sequence similarity 91, member A1	Other	other	Common_Between_RNAseq_&_Microarray
G12642	Tmem65	7	complement(99270342..99310255)	39914	4.42707	4.56983	4.60524	5.41814	5.60377	5.50557	4.53405	0.0943203	5.50916	0.0928687	TMEM65	transmembrane protein 65	Cytoplasm	other	Common_Between_RNAseq_&_Microarray
G12644	Trmt12	7	99348971..99350595	1625	3.04942	3.1308	3.10167	3.43883	3.54071	3.5966	3.09396	0.0412288	3.52538	0.0799959	TRMT12	tRNA methyltransferase 12 homolog (S. cerevisiae)	Other	other	RNAseq_Specific
G12645	Rnf139	7	99371053..99381956	10904	3.94964	3.92323	4.05196	4.35269	4.39242	4.37443	3.97494	0.0679907	4.37318	0.0198953	RNF139	ring finger protein 139	Cytoplasm	enzyme	Common_Between_RNAseq_&_Microarray
G12646	Tatdn1	7	complement(99382591..99403953)	21363	4.94269	4.79033	5.03391	4.74524	4.9076	4.71017	4.92231	0.123058	4.78767	0.105333	Tatdn1	TatD DNase domain containing 1	Other	other	RNAseq_Specific
G12647	Ndufb9	7	99411522..99417939	6418	6.77036	6.79168	6.9581	6.83073	6.93325	6.92532	6.84005	0.10279	6.89643	0.0570389	NDUFB9	NADH dehydrogenase (ubiquinone) 1 beta subcomplex, 9, 22kDa	Cytoplasm	enzyme	Common_Between_RNAseq_&_Microarray
G12648	Mtss1	7	complement(99419337..99557952)	138616	4.76551	4.92049	4.949	4.96691	4.99027	4.96575	4.87833	0.0987401	4.97431	0.0138318	MTSS1	metastasis suppressor 1	Cytoplasm	other	Common_Between_RNAseq_&_Microarray
G1265	Prmt1	1	complement(102035576..102044782)	9207	6.79064	6.72288	6.79168	6.39197	6.56605	6.50573	6.7684	0.039429	6.48792	0.088397	PRMT1	protein arginine methyltransferase 1	Nucleus	enzyme	Common_Between_RNAseq_&_Microarray
G12650	Sqle	7	100196963..100211948	14986	5.09902	5.27136	5.17442	5.97602	5.95035	6.26716	5.1816	0.0863956	6.06451	0.17597	SQLE	squalene epoxidase	Cytoplasm	enzyme	Common_Between_RNAseq_&_Microarray
G12651	RGD1564420	7	complement(100210512..100254422)	43911	4.00683	4.05587	4.01223	4.20697	4.13818	4.17655	4.02498	0.0268918	4.1739	0.0344724	KIAA0196	KIAA0196	Cytoplasm	other	Common_Between_RNAseq_&_Microarray
G12652	Nsmce2	7	100263600..100486902	223303	5.68664	5.70182	5.65578	5.37065	5.34209	5.23793	5.68141	0.0234633	5.31689	0.0698553	NSMCE2	non-SMC element 2, MMS21 homolog (S. cerevisiae)	Nucleus	enzyme	RNAseq_Specific
G12663	Myc	7	103157452..103162376	4925	3.68338	3.82442	3.9865	3.84262	3.91128	4.06713	3.83143	0.151685	3.94034	0.11504	MYC	v-myc avian myelocytomatosis viral oncogene homolog	Nucleus	transcription regulator	RNAseq_Specific
G12665	Adcy8	7	complement(105301842..105540451)	238610	3.59538	3.81932	3.88717	4.04804	4.08937	4.24321	3.76729	0.152692	4.12687	0.102845	ADCY8	adenylate cyclase 8 (brain)	Plasma Membrane	enzyme	Common_Between_RNAseq_&_Microarray
G12667	Efr3a	7	106483576..106564947	81372	4.97107	5.08502	5.11159	5.49457	5.3235	5.37586	5.0559	0.0746547	5.39798	0.0876513	EFR3A	EFR3 homolog A (S. cerevisiae)	Plasma Membrane	other	Common_Between_RNAseq_&_Microarray
G1267	Irf3	1	102056872..102061803	4932	5.29636	5.17742	5.46741	5.08951	5.26125	5.24385	5.31373	0.145773	5.1982	0.0945341	IRF3	interferon regulatory factor 3	Nucleus	transcription regulator	Common_Between_RNAseq_&_Microarray
G12674	PHF20L1	7	107345691..107373740	28050	4.4401	4.26285	4.52175	4.49037	4.24813	4.01895	4.40823	0.132359	4.25249	0.235743	PHF20L1	PHD finger protein 20-like 1	Other	other	Common_Between_RNAseq_&_Microarray
G12679	Ndrg1	7	complement(107683925..107725300)	41376	5.60659	5.36803	5.12404	5.04377	4.98344	5.09078	5.36622	0.241281	5.03933	0.0538045	NDRG1	N-myc downstream regulated 1	Nucleus	kinase	Common_Between_RNAseq_&_Microarray
G1268	Scaf1	1	complement(102062545..102073215)	10671	5.96139	5.80128	5.70625	5.67412	5.57031	5.70321	5.82297	0.128946	5.64921	0.0698622	SCAF1	SR-related CTD-associated factor 1	Nucleus	other	RNAseq_Specific
G12682	PHF20L1	7	108561906..108700209	138304	3.27706	3.4147	3.33678	3.44016	3.37068	3.1833	3.34284	0.06902	3.33138	0.132861	PHF20L1	PHD finger protein 20-like 1	Other	other	Common_Between_RNAseq_&_Microarray
G12687	Khdrbs3	7	109965262..110111223	145962	4.4126	4.5044	4.47359	4.12085	4.15651	4.48877	4.46353	0.0467188	4.25538	0.202909	KHDRBS3	KH domain containing, RNA binding, signal transduction associated 3	Nucleus	other	Common_Between_RNAseq_&_Microarray
G1269	Rras	1	102077759..102081668	3910	3.29184	3.3658	3.41401	3.18726	3.32316	3.43551	3.35722	0.0615356	3.31531	0.124312	RRAS	related RAS viral (r-ras) oncogene homolog	Cytoplasm	enzyme	Common_Between_RNAseq_&_Microarray
G12694	ENSRNOG00000050398	7	complement(113659666..113676676)	17011	4.72982	4.86067	4.59364	4.61028	4.51576	4.55493	4.72804	0.133521	4.56032	0.0474902
G12696	Trappc9	7	complement(113923438..114244503)	321066	6.04144	6.13145	6.07306	5.86195	5.7824	5.85375	6.08198	0.0456609	5.8327	0.0437539	TRAPPC9	trafficking protein particle complex 9	Plasma Membrane	other	Common_Between_RNAseq_&_Microarray
G12697	Chrac1	7	114258512..114261899	3388	3.70013	3.69457	3.7847	3.08985	3.37415	3.15771	3.72646	0.0505078	3.20724	0.148479	CHRAC1	chromatin accessibility complex 1	Nucleus	enzyme	RNAseq_Specific
G12699	Ptk2	7	complement(114371990..114525553)	153564	4.12502	4.28149	4.27631	4.16174	4.15124	4.247	4.22761	0.0888819	4.18666	0.0525199	PTK2	protein tyrosine kinase 2	Cytoplasm	kinase	Common_Between_RNAseq_&_Microarray
G1270	Prr12	1	complement(102088242..102110835)	22594	3.16575	3.14228	3	3	3	3	3.10268	0.0896912	3	0	PRR12	proline rich 12	Extracellular Space	other	RNAseq_Specific
G12704	Ptp4a3	7	114918557..114924152	5596	4.66818	4.57955	4.56709	4.48042	4.5494	4.64299	4.60494	0.0551217	4.5576	0.0815967	PTP4A3	protein tyrosine phosphatase type IVA, member 3	Plasma Membrane	phosphatase	Common_Between_RNAseq_&_Microarray
G12709	Bai1	7	115675214..115733670	58457	4.7099	4.48362	4.63867	4.34311	4.16254	4.24851	4.61073	0.115696	4.25139	0.0903205	BAI1	brain-specific angiogenesis inhibitor 1	Plasma Membrane	G-protein coupled receptor	Common_Between_RNAseq_&_Microarray
G12712	Jrk	7	complement(115847177..115851860)	4684	3.11423	3.17696	3	3.12585	3	3.06762	3.09706	0.0897201	3.06449	0.0629812	JRK	jerky homolog (mouse)	Nucleus	other	RNAseq_Specific
G12713	Them6	7	115861665..115864841	3177	4.29184	4.23441	4.17336	4.31446	4.4687	4.75276	4.2332	0.0592498	4.51198	0.222332	THEM6	thioesterase superfamily member 6	Other	other	RNAseq_Specific
G12717	Lynx1	7	complement(115891669..115892310)	642	3.85966	3.60197	3.629	4.0055	3.63133	4.11587	3.69688	0.141621	3.91757	0.253955	LYNX1	Ly6/neurotoxin 1	Plasma Membrane	transporter	Common_Between_RNAseq_&_Microarray
G1272	NOSIP	1	102120682..102135946	15265	4.44541	4.4464	4.65877	4.34169	4.49487	4.57561	4.51686	0.1229	4.47073	0.118816	NOSIP	nitric oxide synthase interacting protein	Cytoplasm	other	Common_Between_RNAseq_&_Microarray
G12722	Psca	7	115995508..116154102	158595	4.37966	4.36077	4.34701	4.68126	4.63169	4.52644	4.36248	0.0163905	4.61313	0.0790573	PSCA	prostate stem cell antigen	Plasma Membrane	other	RNAseq_Specific
G1273	Rcn3	1	complement(102141920..102151199)	9280	6.8943	6.23888	6.65864	7.61441	7.90431	8.05397	6.59727	0.331994	7.85756	0.223478	RCN3	reticulocalbin 3, EF-hand calcium binding domain	Cytoplasm	other	Common_Between_RNAseq_&_Microarray
G12730	Ly6e	7	116253795..116257488	3694	7.57246	7.44438	7.51379	7.59987	7.60885	7.70935	7.51021	0.0641144	7.63936	0.0607837	LY6E	lymphocyte antigen 6 complex, locus E	Plasma Membrane	other	Common_Between_RNAseq_&_Microarray
G12737	Ly6h	7	complement(116499353..116501205)	1853	7.13439	7.25951	7.28883	6.85011	6.87581	6.77781	7.22758	0.0820216	6.83458	0.0508129	LY6H	lymphocyte antigen 6 complex, locus H	Plasma Membrane	other	Common_Between_RNAseq_&_Microarray
G1274	Fcgrt	1	complement(102151857..102161645)	9789	3.81212	3.58703	3.50055	3.32245	3.55303	3.37486	3.63324	0.160843	3.41678	0.120872	FCGRT	Fc fragment of IgG, receptor, transporter, alpha	Plasma Membrane	transmembrane receptor	Common_Between_RNAseq_&_Microarray
G12741	Gli4	7	116565906..116571116	5211	3.24396	3.09747	3.07106	3	3	3	3.1375	0.0931387	3	0	GLI4	GLI family zinc finger 4	Nucleus	other	RNAseq_Specific
G12742	Top1mt	7	complement(116583001..116606332)	23332	3.40516	3.29991	3.3043	3.55549	3.63133	3.52143	3.33645	0.0595388	3.56942	0.0562603	TOP1MT	topoisomerase (DNA) I, mitochondrial	Cytoplasm	enzyme	RNAseq_Specific
G12743	Rhpn1	7	116631700..116641078	9379	3.53701	3.22088	3.36999	3	3	3	3.37596	0.158152	3	0	RHPN1	rhophilin, Rho GTPase binding protein 1	Cytoplasm	other	Common_Between_RNAseq_&_Microarray
G12749	Eef1d	7	complement(116820232..116835298)	15067	5.37673	5.27786	5.36855	5.59006	5.52356	5.65535	5.34105	0.0548709	5.58966	0.0658962	EEF1D	eukaryotic translation elongation factor 1 delta (guanine nucleotide exchange protein)	Cytoplasm	translation regulator	Common_Between_RNAseq_&_Microarray
G12751	Pycrl	7	complement(116842455..116847953)	5499	4.9006	4.82604	4.96946	4.38691	4.29516	4.36429	4.8987	0.0717277	4.34879	0.0478005	PYCRL	pyrroline-5-carboxylate reductase-like	Other	enzyme	Common_Between_RNAseq_&_Microarray
G12752	TSTA3	7	complement(116851238..116856095)	4858	4.62762	4.54633	4.6499	4.336	4.49931	4.5063	4.60795	0.0545165	4.44721	0.0963694	TSTA3	tissue specific transplantation antigen P35B	Plasma Membrane	enzyme	Common_Between_RNAseq_&_Microarray
G12759	Scrib	7	complement(117091481..117114469)	22989	3.83403	3.70124	3.73845	3.61079	3.44744	3.54134	3.75791	0.0685022	3.53319	0.0819799	SCRIB	scribbled planar cell polarity protein	Cytoplasm	other	Common_Between_RNAseq_&_Microarray
G1276	Rps11	1	complement(102182159..102184324)	2166	8.35946	8.38219	8.44239	8.15267	8.30782	8.21891	8.39468	0.0428547	8.22647	0.0778494	RPS11	ribosomal protein S11	Cytoplasm	other	Common_Between_RNAseq_&_Microarray
G12760	Puf60	7	complement(117114908..117125839)	10932	6.5157	6.50874	6.45917	6.3146	6.34846	6.3705	6.49454	0.0308237	6.34452	0.0281572	PUF60	poly-U binding splicing factor 60KDa	Nucleus	other	Common_Between_RNAseq_&_Microarray
G12761	Nrbp2	7	complement(117131632..117137365)	5734	5.92469	5.68384	5.86579	5.1026	5.18913	4.95975	5.82477	0.125559	5.08383	0.11584	NRBP2	nuclear receptor binding protein 2	Cytoplasm	kinase	Common_Between_RNAseq_&_Microarray
G12763	Plec	7	complement(117215919..117275610)	59692	3.87886	3.70508	3.80441	3.74492	3.64524	3.87984	3.79612	0.0871877	3.75667	0.117743	PLEC	plectin	Cytoplasm	other	Common_Between_RNAseq_&_Microarray
G12765	Grina	7	117290445..117293619	3175	8.00103	7.77848	7.82009	7.98563	7.86823	8.10019	7.86653	0.118323	7.98468	0.115983	GRINA	glutamate receptor, ionotropic, N-methyl D-aspartate-associated protein 1 (glutamate binding)	Other	ion channel	Common_Between_RNAseq_&_Microarray
G12768	Oplah	7	complement(117339712..117354917)	15206	3.30722	3.1184	3.16898	3.01774	3.00521	3.05028	3.1982	0.0977399	3.02441	0.0232641	OPLAH	5-oxoprolinase (ATP-hydrolysing)	Cytoplasm	enzyme	RNAseq_Specific
G12769	Exosc4	7	117377932..117380674	2743	4.00952	4.26996	4.18095	3.77945	3.92323	3.89831	4.15348	0.132375	3.867	0.0768325	EXOSC4	exosome component 4	Nucleus	enzyme	Common_Between_RNAseq_&_Microarray
G1277	Rpl13a	1	complement(102186220..102188911)	2692	9.18546	9.20756	9.40251	8.72525	8.96324	8.81541	9.26518	0.119447	8.83463	0.120157	RPL13A	ribosomal protein L13a	Cytoplasm	other	Common_Between_RNAseq_&_Microarray
G12770	Gpaa1	7	117381997..117385579	3583	5.02992	4.83443	4.96969	5.06832	4.94269	5.09986	4.94468	0.100115	5.03696	0.0831463	GPAA1	glycosylphosphatidylinositol anchor attachment 1	Cytoplasm	enzyme	RNAseq_Specific
G12771	CYC1	7	117397227..117399580	2354	6.93213	6.84039	6.84961	6.74578	6.85472	6.90402	6.87404	0.0505149	6.83484	0.0809755	CYC1	cytochrome c-1	Cytoplasm	enzyme	Common_Between_RNAseq_&_Microarray
G12772	Sharpin	7	complement(117400782..117404993)	4212	5.0846	5.10406	4.94854	4.77507	4.85893	4.89458	5.04573	0.0847335	4.84286	0.0613552	SHARPIN	SHANK-associated RH domain interactor	Plasma Membrane	other	Common_Between_RNAseq_&_Microarray
G12773	Maf1	7	117405317..117408349	3033	5.89893	5.78972	5.8107	5.43776	5.56453	5.52309	5.83312	0.0579545	5.50846	0.0646363	MAF1	MAF1 homolog (S. cerevisiae)	Nucleus	other	Common_Between_RNAseq_&_Microarray
G12775	Fam203a	7	117422049..117424835	2787	3.51891	3.39217	3.59182	3.58401	3.655	3.64583	3.50097	0.101028	3.62828	0.0386104	FAM203A/FAM203B	family with sequence similarity 203, member A	Other	other	Common_Between_RNAseq_&_Microarray
G12777	Mroh1	7	117432821..117459811	26991	3.49163	3.45074	3.09578	3.71554	3.31812	3.53203	3.34605	0.217698	3.5219	0.198905	Mroh1	maestro heat-like repeat family member 1	Other	other	RNAseq_Specific
G12778	Bop1	7	complement(117502164..117525973)	23810	4.56404	4.42405	4.37409	4.53488	4.39896	4.49867	4.45406	0.0984692	4.4775	0.0703878	BOP1	block of proliferation 1	Nucleus	other	Common_Between_RNAseq_&_Microarray
G12780	Hsf1	7	117526154..117553109	26956	4.66761	4.44805	4.52426	4.42707	4.37096	4.49582	4.54664	0.111478	4.43128	0.0625338	HSF1	heat shock transcription factor 1	Nucleus	transcription regulator	Common_Between_RNAseq_&_Microarray
G12781	Dgat1	7	complement(117553999..117564368)	10370	4.72358	4.60377	4.80355	4.90036	4.92191	5.0846	4.7103	0.100551	4.96896	0.100731	DGAT1	diacylglycerol O-acyltransferase 1	Cytoplasm	enzyme	Common_Between_RNAseq_&_Microarray
G12784	Fbxl6	7	complement(117589688..117592585)	2898	3.79559	3.57682	3.63833	3.20067	3.22862	3.24927	3.67025	0.112824	3.22619	0.0243892	FBXL6	F-box and leucine-rich repeat protein 6	Other	enzyme	RNAseq_Specific
G12786	Adck5	7	117631880..117649865	17986	4.1279	3.96173	3.90024	3.94871	3.89684	3.95895	3.99663	0.117775	3.93483	0.033298	ADCK5	aarF domain containing kinase 5	Cytoplasm	kinase	Common_Between_RNAseq_&_Microarray
G12787	Cpsf1	7	complement(117649865..117660364)	10500	4.65162	4.54294	4.48684	4.20032	4.10333	4.11338	4.56047	0.0837725	4.13901	0.0533307	CPSF1	cleavage and polyadenylation specific factor 1, 160kDa	Nucleus	other	RNAseq_Specific
G12789	Vps28	7	complement(117672422..117676270)	3849	6.85379	6.82781	6.86666	6.4522	6.5168	6.66903	6.84942	0.0197887	6.54601	0.111325	VPS28	vacuolar protein sorting 28 homolog (S. cerevisiae)	Cytoplasm	transporter	Common_Between_RNAseq_&_Microarray
G1279	Aldh16a1	1	complement(102203197..102216266)	13070	3.88326	3.66582	3.87443	3.71883	3.58101	3.72595	3.80784	0.123067	3.67527	0.0817044	ALDH16A1	aldehyde dehydrogenase 16 family, member A1	Other	enzyme	RNAseq_Specific
G12791	RGD1561328	7	complement(117697254..117710445)	13192	5.23026	5.17223	5.10531	4.7724	4.70271	4.66903	5.16927	0.0625254	4.71471	0.0527218	RGD1561328	cysteine and histidine rich 1-like	Other	other	Common_Between_RNAseq_&_Microarray
G12792	Kifc2	7	117711349..117718783	7435	5.08545	4.88723	5.18717	4.11296	4.23365	4.02914	5.05328	0.152536	4.12525	0.102805	KIFC2	kinesin family member C2	Cytoplasm	other	Common_Between_RNAseq_&_Microarray
G12794	Ppp1r16a	7	117722085..117745228	23144	4.16415	4.01088	3.96033	3.96588	4.01984	4.04496	4.04512	0.106137	4.01023	0.0404056	PPP1R16A	protein phosphatase 1, regulatory subunit 16A	Plasma Membrane	other	RNAseq_Specific
G12795	Gpt	7	117747058..117749910	2853	3.3658	3.13571	3.68056	3	3	3	3.39402	0.273519	3	0	GPT	glutamic-pyruvate transaminase (alanine aminotransferase)	Cytoplasm	enzyme	Common_Between_RNAseq_&_Microarray
G12796	Mfsd3	7	117751879..117753881	2003	4.04016	3.87493	4.04804	4.14188	4.07614	4.26698	3.98771	0.0977473	4.16167	0.0969449	MFSD3	major facilitator superfamily domain containing 3	Other	other	RNAseq_Specific
G12798	Lrrc14	7	117761927..117767484	5558	4.26322	4.30395	4.32956	3.79201	3.76891	3.75503	4.29891	0.0334562	3.77198	0.0186801	LRRC14	leucine rich repeat containing 14	Other	other	Common_Between_RNAseq_&_Microarray
G12799	Lrrc24	7	complement(117767712..117774850)	7139	5.64342	5.50874	5.5035	5.52732	5.54117	5.5146	5.55189	0.0793152	5.5277	0.0132932	LRRC24	leucine rich repeat containing 24	Other	other	RNAseq_Specific
G1280	Pih1d1	1	102217680..102221752	4073	4.01133	3.95521	3.98197	3.61315	3.75878	3.68507	3.98284	0.0280706	3.68567	0.0728136	PIH1D1	PIH1 domain containing 1	Other	other	RNAseq_Specific
G12800	MGC94207	7	complement(117774185..117776528)	2344	4.06713	4.17497	3.95151	3.80954	3.7673	3.89251	4.06453	0.111753	3.82312	0.0636972	C8orf82	chromosome 8 open reading frame 82	Cytoplasm	other	Common_Between_RNAseq_&_Microarray
G12801	Arhgap39	7	complement(117776694..117869344)	92651	3.64698	3.66638	3.6255	3.5518	3.49547	3.50375	3.64629	0.0204506	3.51701	0.0304177	ARHGAP39	Rho GTPase activating protein 39	Nucleus	other	Common_Between_RNAseq_&_Microarray
G12803	Zfp251	7	complement(117899537..117924579)	25043	3.11756	3.18964	3	3.25381	3.06503	3.03105	3.1024	0.0957255	3.11663	0.120012	ZNF251	zinc finger protein 251	Nucleus	other	RNAseq_Specific
G12809	1110038F14Rik	7	118007781..118009440	1660	3.69457	3.66299	3.67147	3.51829	3.69122	3.72049	3.67634	0.016341	3.64333	0.109273
G12811	Rbfox2	7	complement(118149476..118388515)	239040	3.85718	3.77524	3.68056	3.92749	3.82696	3.7847	3.77099	0.0883913	3.84638	0.0733532	RBFOX2	RNA binding protein, fox-1 homolog (C. elegans) 2	Nucleus	transcription regulator	RNAseq_Specific
G12814	Commd5	7	118495338..118496759	1422	4.19206	4.17097	4.1488	4.00324	4.05587	4.08639	4.17061	0.0216308	4.0485	0.0420627	COMMD5	COMM domain containing 5	Nucleus	other	Common_Between_RNAseq_&_Microarray
G12817	Apol3	7	118682730..118691564	8835	3.17617	3	3.12088	3.50883	3.33678	3.68729	3.09902	0.0900983	3.51097	0.175265	Apol3	apolipoprotein L, 3	Other	transporter	Common_Between_RNAseq_&_Microarray
G12820	Myh9	7	complement(118738702..118790053)	51352	4.6944	4.6713	4.43044	4.91285	4.41531	4.80588	4.59871	0.146189	4.71134	0.261898	MYH9	myosin, heavy chain 9, non-muscle	Cytoplasm	transporter	Common_Between_RNAseq_&_Microarray
G12828	Txn2	7	complement(119138949..119152970)	14022	6.22911	6.35596	6.26275	5.97235	6.1102	6.13196	6.28261	0.0657184	6.0715	0.0865574	TXN2	thioredoxin 2	Cytoplasm	enzyme	Common_Between_RNAseq_&_Microarray
G12830	Eif3d	7	complement(119182951..119195340)	12390	5.86307	5.77583	5.86071	5.85885	5.78292	5.77991	5.8332	0.0497001	5.80723	0.0447324	EIF3D	eukaryotic translation initiation factor 3, subunit D	Cytoplasm	translation regulator	Common_Between_RNAseq_&_Microarray
G12831	Cacng2	7	complement(119222819..119343985)	121167	4.11962	4.00773	4.16374	4.39344	3.99288	3.94964	4.09703	0.0804211	4.11199	0.244703	CACNG2	calcium channel, voltage-dependent, gamma subunit 2	Plasma Membrane	ion channel	Common_Between_RNAseq_&_Microarray
G12833	Ift27	7	complement(119384971..119401297)	16327	4.89236	4.86266	5.00654	4.26921	4.46218	4.38243	4.92052	0.0759579	4.37127	0.0969658	IFT27	intraflagellar transport 27 homolog (Chlamydomonas)	Extracellular Space	enzyme	Common_Between_RNAseq_&_Microarray
G12837	Tst	7	complement(119606996..119613809)	6814	5.3188	5.26875	5.38246	5.07413	5.21984	5.17523	5.32333	0.0569904	5.1564	0.0746587	TST	thiosulfate sulfurtransferase (rhodanese)	Cytoplasm	enzyme	Common_Between_RNAseq_&_Microarray
G12838	MPST	7	119614631..119622095	7465	3.60374	3.57378	3.75771	3.36789	3.64295	3.63833	3.64508	0.0986859	3.54972	0.157492	MPST	mercaptopyruvate sulfurtransferase	Cytoplasm	enzyme	Common_Between_RNAseq_&_Microarray
G12839	Kctd17	7	119637883..119648656	10774	4.78955	4.71731	4.78798	4.76949	4.67927	4.84071	4.76495	0.0412618	4.76316	0.0809052	KCTD17	potassium channel tetramerization domain containing 17	Other	other	Common_Between_RNAseq_&_Microarray
G12842	C1qtnf6	7	complement(119734790..119741304)	6515	3	3	3	3	3	3.00792	3	0	3.00264	0.00457161	C1qtnf6	C1q and tumor necrosis factor related protein 6	Extracellular Space	other	Common_Between_RNAseq_&_Microarray
G12843	Sstr3	7	complement(119749198..119756392)	7195	3	3	3	3.46845	3.36999	3.71391	3	0	3.51745	0.177115	SSTR3	somatostatin receptor 3	Plasma Membrane	G-protein coupled receptor	Common_Between_RNAseq_&_Microarray
G12847	Mfng	7	complement(119970579..119988416)	17838	3.30796	3.18093	3.35948	3.17934	3.31303	3.3686	3.28279	0.0918949	3.28699	0.0972793	MFNG	MFNG O-fucosylpeptide 3-beta-N-acetylglucosaminyltransferase	Cytoplasm	enzyme	RNAseq_Specific
G12851	Gga1	7	120098422..120111258	12837	4.83746	4.80973	4.71482	4.94011	4.86266	5.03588	4.78734	0.0643112	4.94622	0.0867722	GGA1	golgi-associated, gamma adaptin ear containing, ARF binding protein 1	Cytoplasm	transporter	Common_Between_RNAseq_&_Microarray
G12853	Pdxp	7	120132151..120137599	5449	6.12371	6.13679	6.07114	4.72684	4.94784	4.65649	6.11054	0.0347489	4.77706	0.152028	PDXP	pyridoxal (pyridoxine, vitamin B6) phosphatase	Plasma Membrane	phosphatase	Common_Between_RNAseq_&_Microarray
G12854	Lgals1	7	120144848..120147980	3133	4.43844	4.26096	4.4497	4.63693	4.70382	4.85917	4.38303	0.10587	4.73331	0.114019	LGALS1	lectin, galactoside-binding, soluble, 1	Extracellular Space	other	Common_Between_RNAseq_&_Microarray
G12855	Nol12	7	120152881..120158542	5662	3.45074	3.49993	3.72595	3.77681	3.936	4.09064	3.55887	0.146771	3.93449	0.156922	NOL12	nucleolar protein 12	Nucleus	other	Common_Between_RNAseq_&_Microarray
G12857	H1f0	7	120252161..120254014	1854	5.10406	5.06095	4.82604	4.86215	5.10322	5.03102	4.99702	0.149629	4.9988	0.123722	H1F0	H1 histone family, member 0	Nucleus	other	Common_Between_RNAseq_&_Microarray
G12860	Ankrd54	7	complement(120275642..120286573)	10932	3.56831	3.3887	3.53203	3.29184	3.21467	3.30501	3.49635	0.0949728	3.27051	0.0488018	ANKRD54	ankyrin repeat domain 54	Nucleus	transcription regulator	RNAseq_Specific
G12861	Eif3l	7	120314744..120325674	10931	6.31125	6.19849	6.19849	6.44444	6.46751	6.41683	6.23608	0.0651	6.44293	0.0253733	Eif3l	eukaryotic translation initiation factor 3, subunit L	Nucleus	other	Common_Between_RNAseq_&_Microarray
G12862	Micall1	7	120339357..120364917	25561	3	3.08389	3	3	3	3	3.02796	0.0484366	3	0	MICALL1	MICAL-like 1	Cytoplasm	other	RNAseq_Specific
G12863	RGD1359634	7	complement(120366954..120374272)	7319	5.35628	5.4599	5.51223	5.27583	5.41629	5.41527	5.4428	0.0793651	5.36913	0.0808003	C22orf23	chromosome 22 open reading frame 23	Other	other	Common_Between_RNAseq_&_Microarray
G12864	Polr2f	7	120374383..120386016	11634	3.66524	3.69568	3.85519	3.63133	3.70178	3.72486	3.73871	0.102022	3.68599	0.0487231	POLR2F	polymerase (RNA) II (DNA directed) polypeptide F	Nucleus	enzyme	Common_Between_RNAseq_&_Microarray
G12866	Pick1	7	120459071..120478332	19262	4.84071	4.78902	4.9006	4.86887	5.04312	5.01236	4.84345	0.0558376	4.97478	0.0930027	PICK1	protein interacting with PRKCA 1	Cytoplasm	enzyme	Common_Between_RNAseq_&_Microarray
G12869	Pla2g6	7	complement(120512623..120552754)	40132	4.92829	4.85298	4.83695	4.23211	4.20697	4.19167	4.87274	0.0487718	4.21025	0.0204193	PLA2G6	phospholipase A2, group VI (cytosolic, calcium-independent)	Cytoplasm	enzyme	Common_Between_RNAseq_&_Microarray
G12871	Tmem184b	7	complement(120586166..120629422)	43257	5.07112	5.22621	4.92403	5.29912	5.39947	5.53947	5.07379	0.151109	5.41269	0.120718	TMEM184B	transmembrane protein 184B	Other	other	Common_Between_RNAseq_&_Microarray
G12872	Csnk1e	7	complement(120646909..120665180)	18272	4.9848	5.17283	4.91502	4.988	4.86413	4.96946	5.02422	0.133349	4.94053	0.0668111	CSNK1E	casein kinase 1, epsilon	Cytoplasm	kinase	Common_Between_RNAseq_&_Microarray
G12875	Ddx17	7	complement(120754843..120758011)	3169	7.19869	7.09394	7.01645	6.7486	6.65026	6.40352	7.10303	0.0914583	6.60079	0.177777	Ddx17	DEAD (Asp-Glu-Ala-Asp) box helicase 17	Nucleus	transcription regulator	Common_Between_RNAseq_&_Microarray
G12876	ENSRNOG00000013691	7	complement(120758999..120772909)	13911	7.68323	7.57246	7.18327	7.34911	6.99936	6.57841	7.47966	0.262585	6.97563	0.385899
G12878	Fam227a	7	complement(120839737..120872765)	33029	4.06105	3.99919	4.46022	3	3.02042	3	4.17349	0.250233	3.00681	0.0117894	FAM227A	family with sequence similarity 227, member A	Other	other	RNAseq_Specific
G12879	CBY1	7	120884400..120888649	4250	5.08269	4.9993	5.18182	4.64385	4.71978	4.67616	5.08794	0.0913705	4.67993	0.0381052	CBY1	chibby homolog 1 (Drosophila)	Cytoplasm	other	Common_Between_RNAseq_&_Microarray
G12880	Tomm22	7	120892307..120894054	1748	5.34477	5.45416	5.51712	5.221	5.44987	5.4356	5.43868	0.0872119	5.36882	0.128214	TOMM22	translocase of outer mitochondrial membrane 22 homolog (yeast)	Cytoplasm	transporter	Common_Between_RNAseq_&_Microarray
G12881	Josd1	7	complement(120895716..120910124)	14409	3.71664	3.94871	3.96404	4.18613	4.33277	4.44407	3.87646	0.138621	4.32099	0.129373	JOSD1	Josephin domain containing 1	Other	other	Common_Between_RNAseq_&_Microarray
G12882	Gtpbp1	7	120914233..120938682	24450	4.50977	4.51259	4.32205	3.97876	3.93034	3.97278	4.44814	0.109205	3.96062	0.0264008	Gtpbp1	GTP binding protein 1	Cytoplasm	enzyme	RNAseq_Specific
G12883	Sun2	7	complement(120941356..120958528)	17173	4.84171	4.67927	4.58618	5.07198	4.78615	5.17542	4.70239	0.129321	5.01118	0.201633	SUN2	Sad1 and UNC84 domain containing 2	Nucleus	other	Common_Between_RNAseq_&_Microarray
G12884	Dnal4	7	complement(120978397..120991231)	12835	4.84746	4.68406	4.8087	4.4143	4.51259	4.5601	4.78007	0.0853799	4.49566	0.0743635	DNAL4	dynein, axonemal, light chain 4	Cytoplasm	enzyme	Common_Between_RNAseq_&_Microarray
G12885	Nptxr	7	complement(121002639..121020713)	18075	7.10771	6.9859	6.69585	7.59415	7.09983	7.55775	6.92982	0.211578	7.41724	0.275489	NPTXR	neuronal pentraxin receptor	Plasma Membrane	transmembrane receptor	Common_Between_RNAseq_&_Microarray
G12886	Cbx6	7	complement(121041261..121048988)	7728	5.61692	5.62059	5.29343	5.14354	4.8836	4.91333	5.51031	0.187835	4.98016	0.14227	CBX6	chromobox homolog 6	Nucleus	other	RNAseq_Specific
G12888	Cbx7	7	complement(121126405..121143721)	17317	4.21438	4.04103	4.17097	3.41197	3.48716	3.41807	4.14213	0.0902005	3.43907	0.0417633	CBX7	chromobox homolog 7	Nucleus	other	Common_Between_RNAseq_&_Microarray
G12889	Pdgfb	7	complement(121205506..121223140)	17635	3.07365	3.33249	3	3.92562	3.46454	3.93034	3.13538	0.17463	3.7735	0.267578	PDGFB	platelet-derived growth factor beta polypeptide	Extracellular Space	growth factor	RNAseq_Specific
G12890	Rpl3	7	complement(121287085..121292461)	5377	9.4346	9.44883	9.53831	8.75861	8.8961	8.86583	9.47391	0.0562244	8.84018	0.072245	RPL3	ribosomal protein L3	Cytoplasm	other	Common_Between_RNAseq_&_Microarray
G12891	Syngr1	7	121301106..121324532	23427	5.14679	5.19091	4.27743	5.27023	4.70713	4.67927	4.87171	0.515134	4.88555	0.33344	SYNGR1	synaptogyrin 1	Plasma Membrane	transporter	RNAseq_Specific
G12892	Tab1	7	121340948..121371923	30976	4.2666	4.297	4.20424	3.90936	3.90504	3.95709	4.25595	0.0472902	3.92383	0.028887	TAB1	TGF-beta activated kinase 1/MAP3K7 binding protein 1	Cytoplasm	enzyme	Common_Between_RNAseq_&_Microarray
G12893	Mgat3	7	121398823..121425021	26199	4.06626	4.10835	3.53078	4.07871	3.81675	3.84161	3.9018	0.321997	3.91236	0.144599	MGAT3	mannosyl (beta-1,4-)-glycoprotein beta-1,4-N-acetylglucosaminyltransferase	Cytoplasm	enzyme	RNAseq_Specific
G12895	Smcr7l	7	121458674..121463161	4488	3.51703	3.37486	3.22862	3.45536	3.29404	3.39077	3.3735	0.144211	3.38006	0.0811925
G12896	Atf4	7	121468540..121470594	2055	7.50447	7.64159	7.88335	9.16839	9.35109	9.51294	7.67647	0.191829	9.34414	0.17238	ATF4	activating transcription factor 4	Nucleus	transcription regulator	Common_Between_RNAseq_&_Microarray
G12897	Rps19bp1	7	complement(121476268..121476890)	623	3.07452	3.04333	3	3	3.12996	3.24927	3.03928	0.0374232	3.12641	0.124671	RPS19BP1	ribosomal protein S19 binding protein 1	Nucleus	other	RNAseq_Specific
G12906	Adsl	7	122148984..122176665	27682	5.26875	5.40049	5.36296	5.03962	5.08502	4.96321	5.34407	0.0678737	5.02928	0.0615628	ADSL	adenylosuccinate lyase	Cytoplasm	enzyme	Common_Between_RNAseq_&_Microarray
G12908	Sgsm3	7	122187869..122217328	29460	5.45777	5.4129	5.30076	5.35558	5.25542	5.36978	5.39047	0.0808709	5.32693	0.06233	SGSM3	small G protein signaling modulator 3	Plasma Membrane	other	Common_Between_RNAseq_&_Microarray
G12909	Mkl1	7	complement(122218547..122313356)	94810	3.77524	3.76464	3.50883	3.63485	3.49034	3.61491	3.6829	0.150847	3.58003	0.0783111	MKL1	megakaryoblastic leukemia (translocation) 1	Nucleus	transcription regulator	RNAseq_Specific
G12911	Mchr1	7	122432538..122435016	2479	3	3	3	4.0176	3.8954	4.39173	3	0	4.10158	0.258602	MCHR1	melanin-concentrating hormone receptor 1	Plasma Membrane	G-protein coupled receptor	RNAseq_Specific
G12912	Slc25a17	7	complement(122515166..122557399)	42234	5.49713	5.49313	5.61515	5.09713	5.1535	5.22775	5.53513	0.0693253	5.15946	0.0655179	SLC25A17	solute carrier family 25 (mitochondrial carrier; peroxisomal membrane protein, 34kDa), member 17	Cytoplasm	transporter	Common_Between_RNAseq_&_Microarray
G12913	St13	7	complement(122561393..122612277)	50885	6.78574	6.83812	6.65799	6.81538	6.6292	6.63255	6.76062	0.0926531	6.69238	0.106537	ST13	suppression of tumorigenicity 13 (colon carcinoma) (Hsp70 interacting protein)	Cytoplasm	other	Common_Between_RNAseq_&_Microarray
G12917	Rbx1	7	122677395..122686075	8681	7.50798	7.63233	7.43623	7.43956	7.47344	7.44173	7.52551	0.099221	7.45158	0.0189638	Rbx1	ring-box 1	Cytoplasm	enzyme	Common_Between_RNAseq_&_Microarray
G12919	EP300	7	122793713..122821002	27290	3.26586	3.33035	3.14065	3.2386	3.25683	3.35384	3.24562	0.0964599	3.28309	0.0619439	EP300	E1A binding protein p300	Nucleus	transcription regulator	Common_Between_RNAseq_&_Microarray
G1292	Ppfia3	1	complement(102393147..102420877)	27731	4.40477	4.35585	4.09996	4.2681	4.17936	4.27071	4.28686	0.1637	4.23939	0.052002	PPFIA3	protein tyrosine phosphatase, receptor type, f polypeptide (PTPRF), interacting protein (liprin), alpha 3	Plasma Membrane	phosphatase	Common_Between_RNAseq_&_Microarray
G12920	L3mbtl2	7	122871438..122892514	21077	5.58811	5.43477	5.53372	4.99476	5.0405	4.84121	5.51887	0.0777458	4.95883	0.104391	L3MBTL2	l(3)mbt-like 2 (Drosophila)	Nucleus	transcription regulator	Common_Between_RNAseq_&_Microarray
G12922	Rangap1	7	complement(122915003..122942464)	27462	6.65105	6.58097	6.52019	6.8483	6.63255	6.70058	6.58407	0.0654869	6.72714	0.110298	RANGAP1	Ran GTPase activating protein 1	Nucleus	other	Common_Between_RNAseq_&_Microarray
G12924	Zc3h7b	7	122976510..123003695	27186	5.09586	5.10636	4.86438	4.60968	4.67899	4.53705	5.0222	0.136778	4.60857	0.070975	ZC3H7B	zinc finger CCCH-type containing 7B	Nucleus	other	Common_Between_RNAseq_&_Microarray
G12925	Tef	7	123019282..123034383	15102	4.5063	4.46838	4.24321	3.47753	3.46192	3.34248	4.40596	0.142221	3.42731	0.0738762	TEF	thyrotrophic embryonic factor	Nucleus	transcription regulator	Common_Between_RNAseq_&_Microarray
G12928	Phf5a	7	complement(123070683..123077281)	6599	4.5355	4.46186	4.69993	4.56133	4.62031	4.65162	4.56576	0.121887	4.61108	0.045846	PHF5A	PHD finger protein 5A	Nucleus	transcription regulator	Common_Between_RNAseq_&_Microarray
G12929	Aco2	7	123077888..123120964	43077	7.52917	7.53942	7.37052	7.2892	7.1626	7.2078	7.47971	0.0946948	7.21987	0.0641554	ACO2	aconitase 2, mitochondrial	Cytoplasm	enzyme	Common_Between_RNAseq_&_Microarray
G1293	Lin7b	1	complement(102422048..102424623)	2576	4.79294	4.66275	4.70604	3.76464	3.97462	3.38664	4.72057	0.0663006	3.70863	0.297963	LIN7B	lin-7 homolog B (C. elegans)	Cytoplasm	other	RNAseq_Specific
G12930	Polr3h	7	complement(123121661..123131987)	10327	4.77055	4.67786	4.8286	4.23557	4.44143	4.44838	4.759	0.0760319	4.37513	0.120911	POLR3H	polymerase (RNA) III (DNA directed) polypeptide H (22.9kD)	Nucleus	enzyme	Common_Between_RNAseq_&_Microarray
G12931	Csdc2	7	123144206..123158716	14511	5.65978	5.38849	5.38401	5.90038	5.76062	6.0568	5.47743	0.157939	5.90593	0.148169	CSDC2	cold shock domain containing C2, RNA binding	Cytoplasm	other	Common_Between_RNAseq_&_Microarray
G12932	Pmm1	7	complement(123158887..123169142)	10256	6.20886	6.14639	6.23515	6.17393	6.36089	6.38309	6.1968	0.0455935	6.30597	0.114889	PMM1	phosphomannomutase 1	Cytoplasm	enzyme	Common_Between_RNAseq_&_Microarray
G12934	Desi1	7	complement(123223023..123244325)	21303	4.23288	4.31844	4.17097	4.77955	4.69633	4.75356	4.24076	0.0740486	4.74315	0.0425728	DESI1	desumoylating isopeptidase 1	Other	other	Common_Between_RNAseq_&_Microarray
G12935	Xrcc6	7	123244581..123265278	20698	4.9076	4.86116	4.9745	5.11118	5.16402	5.10846	4.91442	0.0569762	5.12788	0.031323	XRCC6	X-ray repair complementing defective repair in Chinese hamster cells 6	Nucleus	enzyme	Common_Between_RNAseq_&_Microarray
G12936	Nhp2l1	7	complement(123267419..123272386)	4968	5.0186	5.30533	5.33783	5.15269	5.27936	5.25031	5.22059	0.175682	5.22745	0.0663523	NHP2L1	NHP2 non-histone chromosome protein 2-like 1 (S. cerevisiae)	Nucleus	other	Common_Between_RNAseq_&_Microarray
G1294	Snrnp70	1	complement(102431123..102468582)	37460	7.3777	7.17889	7.52686	6.98927	6.86517	6.8062	7.36115	0.174571	6.88688	0.0934456	SNRNP70	small nuclear ribonucleoprotein 70kDa (U1)	Nucleus	other	Common_Between_RNAseq_&_Microarray
G12941	Srebf2	7	123364495..123422294	57800	4.82021	5.07198	4.77586	5.16178	5.19722	5.29985	4.88935	0.159705	5.21962	0.071705	SREBF2	sterol regulatory element binding transcription factor 2	Nucleus	transcription regulator	Common_Between_RNAseq_&_Microarray
G12946	1500009C09Rik	7	123466996..123474760	7765	5.4723	5.33462	5.15067	4.39828	4.29884	4.14799	5.31919	0.161368	4.2817	0.126021
G12947	Sept3	7	123495523..123511261	15739	6.64846	6.68306	6.5108	6.56514	6.40659	6.30186	6.61411	0.0911241	6.42453	0.132552	SEPT3	septin 3	Cytoplasm	enzyme	RNAseq_Specific
G12949	Naga	7	complement(123547945..123556139)	8195	4.74578	4.62675	4.602	4.5063	4.60109	4.68406	4.65818	0.0768693	4.59715	0.0889422	NAGA	N-acetylgalactosaminidase, alpha-	Cytoplasm	enzyme	Common_Between_RNAseq_&_Microarray
G12951	Smdt1	7	123563597..123565558	1962	7.21166	7.09983	7.19318	6.86	7.09394	7.09178	7.16823	0.0599503	7.01524	0.134447	SMDT1	single-pass membrane protein with aspartate-rich tail 1	Extracellular Space	other	Common_Between_RNAseq_&_Microarray
G12952	Ndufa6	7	complement(123567781..123571638)	3858	6.0568	6.19613	6.39754	5.89676	6.12371	6.01625	6.21683	0.171311	6.01224	0.113529	NDUFA6	NADH dehydrogenase (ubiquinone) 1 alpha subcomplex, 6, 14kDa	Cytoplasm	enzyme	Common_Between_RNAseq_&_Microarray
G12958	Tcf20	7	complement(123655990..123753836)	97847	4.1221	4.18214	4.02337	4.05976	4.00278	3.90311	4.10921	0.0801654	3.98855	0.0792883	TCF20	transcription factor 20 (AR1)	Nucleus	transcription regulator	RNAseq_Specific
G12961	Serhl2	7	123946390..123972802	26413	3.70894	3.5786	3.80904	3.28076	3.52332	3.37415	3.69886	0.115551	3.39274	0.122345	SERHL2	serine hydrolase-like 2	Cytoplasm	enzyme	RNAseq_Specific
G12962	Rrp7a	7	complement(123962950..123972838)	9889	4.52551	4.41362	4.39964	4.61355	4.61176	4.65133	4.44626	0.0689891	4.62555	0.0223477	RRP7A	ribosomal RNA processing 7 homolog A (S. cerevisiae)	Cytoplasm	other	Common_Between_RNAseq_&_Microarray
G12963	Poldip3	7	complement(123974866..124003513)	28648	5.17682	5.24726	5.08162	4.86389	4.86166	4.74444	5.16857	0.0831248	4.82333	0.0683289	POLDIP3	polymerase (DNA-directed), delta interacting protein 3	Nucleus	other	Common_Between_RNAseq_&_Microarray
G12964	Cyb5r3	7	complement(124006942..124024519)	17578	6.44493	6.25238	6.22081	5.97441	5.89069	6.1036	6.30604	0.121314	5.98957	0.107263	CYB5R3	cytochrome b5 reductase 3	Cytoplasm	enzyme	Common_Between_RNAseq_&_Microarray
G12967	Arfgap3	7	complement(124136869..124149920)	13052	5.1327	5.19289	5.29581	5.32979	5.44756	5.44756	5.20713	0.0824826	5.4083	0.0679904	Arfgap3	ADP-ribosylation factor GTPase activating protein 3	Cytoplasm	other	Common_Between_RNAseq_&_Microarray
G12968	Pacsin2	7	complement(124215247..124306978)	91732	4.73199	4.7533	4.68797	4.96691	4.81767	4.96321	4.72442	0.0333158	4.91593	0.085113	PACSIN2	protein kinase C and casein kinase substrate in neurons 2	Cytoplasm	transporter	Common_Between_RNAseq_&_Microarray
G12969	Ttll1	7	complement(124327306..124356545)	29240	4.93278	4.93064	4.84447	4.50725	4.62762	4.49931	4.90263	0.050382	4.54473	0.0718975	TTLL1	tubulin tyrosine ligase-like family, member 1	Extracellular Space	enzyme	RNAseq_Specific
G12971	Mcat	7	complement(124401456..124412526)	11071	3.24623	3.27481	3.34176	3.28149	3.36999	3.35948	3.2876	0.0490325	3.33699	0.0483471	MCAT	malonyl CoA:ACP acyltransferase (mitochondrial)	Cytoplasm	enzyme	Common_Between_RNAseq_&_Microarray
G12973	Ttll12	7	complement(124461238..124479484)	18247	5.25711	5.48058	5.14679	4.99228	4.82021	4.89163	5.29483	0.170057	4.90137	0.0864471	TTLL12	tubulin tyrosine ligase-like family, member 12	Other	other	RNAseq_Specific
G12977	Sult4a1	7	complement(124946961..124970976)	24016	6.89722	6.75869	6.70694	6.89473	6.82101	6.79785	6.78762	0.0983805	6.83786	0.0505884	Sult4a1	sulfotransferase family 4A, member 1	Cytoplasm	enzyme	Common_Between_RNAseq_&_Microarray
G12980	Samm50	7	125047478..125071017	23540	5.69822	5.69822	5.72642	5.38814	5.532	5.58661	5.70762	0.0162846	5.50225	0.102525	SAMM50	SAMM50 sorting and assembly machinery component	Cytoplasm	other	Common_Between_RNAseq_&_Microarray
G12981	Ldoc1l	7	complement(125195454..125196185)	732	3.3949	3.03105	3	3.49675	3.04942	3.3949	3.14198	0.219579	3.31369	0.234457	LDOC1L	leucine zipper, down-regulated in cancer 1-like	Other	other	RNAseq_Specific
G12986	Npap60	7	125551331..125564950	13620	3.77419	3.76091	3.75239	4.18573	4.10585	4.08767	3.7625	0.0109849	4.12642	0.0521654	NUP50	nucleoporin 50kDa	Nucleus	transporter	RNAseq_Specific
G12987	RGD1304694	7	complement(125571736..125607106)	35371	4.15692	3.92181	3.84011	4.06452	3.86707	4.0353	3.97295	0.164479	3.98896	0.106572	KIAA0930	KIAA0930	Other	other	RNAseq_Specific
G1299	Ruvbl2	1	complement(102493177..102506032)	12856	5.04639	4.9993	5.02948	5.04029	4.99521	5.17382	5.02506	0.0238539	5.06977	0.0928856	RUVBL2	RuvB-like AAA ATPase 2	Nucleus	transcription regulator	Common_Between_RNAseq_&_Microarray
G12990	Fam118a	7	125652051..125678576	26526	4.71127	4.76657	4.85993	4.78404	4.81385	4.76657	4.77926	0.0751338	4.78815	0.0239083	FAM118A	family with sequence similarity 118, member A	Other	other	Common_Between_RNAseq_&_Microarray
G12993	Fbln1	7	125810696..125890371	79676	3.12585	3	3	3	3	3	3.04195	0.0726568	3	0	FBLN1	fibulin 1	Extracellular Space	other	Common_Between_RNAseq_&_Microarray
G12994	Atxn10	7	125942296..126065027	122732	7.29132	7.40729	7.25951	7.32767	7.34041	7.40729	7.31937	0.0777807	7.35846	0.0427662	ATXN10	ataxin 10	Cytoplasm	other	Common_Between_RNAseq_&_Microarray
G12999	RGD1306001	7	complement(126398401..126402228)	3828	3.86017	3.53203	3.34888	3.23323	3.42346	3.51891	3.58036	0.259047	3.39187	0.145436	RGD1306001	similar to 2210021J22Rik protein	Other	other	Common_Between_RNAseq_&_Microarray
G1300	Gys1	1	102506605..102526038	19434	3.94309	3.97278	3.85917	4.196	4.04584	4.2167	3.92502	0.0589214	4.15284	0.0932478	GYS1	glycogen synthase 1 (muscle)	Cytoplasm	enzyme	Common_Between_RNAseq_&_Microarray
G13004	Trmu	7	126467263..126483589	16327	4.1312	4.00324	4.0353	3.85818	3.83201	3.78888	4.05658	0.0665834	3.82636	0.0349945	TRMU	tRNA 5-methylaminomethyl-2-thiouridylate methyltransferase	Cytoplasm	enzyme	RNAseq_Specific
G13006	Gramd4	7	126681301..126721804	40504	3.58943	3.55549	3.40516	3.59901	3.38179	3.41061	3.51669	0.0980706	3.46381	0.117974	GRAMD4	GRAM domain containing 4	Other	other	RNAseq_Specific
G13007	Cerk	7	complement(126726021..126768650)	42630	3.43883	3.65214	3.51829	3.66865	3.69291	3.78104	3.53642	0.107805	3.7142	0.0591419	CERK	ceramide kinase	Plasma Membrane	kinase	Common_Between_RNAseq_&_Microarray
G13008	ENSRNOG00000037087	7	complement(126792542..126792820)	279	3.66299	4.0001	3.8008	3.12585	3.09915	3.27183	3.8213	0.169484	3.16561	0.0929498
G13009	Tbc1d22a	7	126793081..127154298	361218	4.31916	3.98424	4.05196	4.09996	3.94027	4.09107	4.11845	0.177086	4.04377	0.0897402	TBC1D22A	TBC1 domain family, member 22A	Other	other	RNAseq_Specific
G1301	FTL1	1	complement(102527141..102528775)	1635	7.32915	7.27524	7.41936	7.63404	7.75171	7.96134	7.34125	0.0728159	7.78236	0.165788
G13013	Fam19a5	7	128196443..128419725	223283	6.97797	6.91964	6.69606	6.1102	6.15208	6.0167	6.86456	0.148808	6.09299	0.0693135	FAM19A5	family with sequence similarity 19 (chemokine (C-C motif)-like), member A5	Extracellular Space	other	Common_Between_RNAseq_&_Microarray
G13017	Brd1	7	complement(129366021..129413531)	47511	3.95802	3.97601	4.05587	3.95662	3.95802	3.85917	3.99663	0.0520851	3.92461	0.0566694	BRD1	bromodomain containing 1	Nucleus	other	RNAseq_Specific
G13019	Alg12	7	complement(129487375..129501100)	13726	3.53701	3.43551	3.54258	3.49228	3.5798	3.48201	3.50503	0.0602766	3.51803	0.0537451	ALG12	ALG12, alpha-1,6-mannosyltransferase	Cytoplasm	enzyme	RNAseq_Specific
G13020	Creld2	7	129501501..129508346	6846	4.84347	4.79294	5.12982	4.56983	4.72684	4.32706	4.92208	0.181678	4.54125	0.201417	CRELD2	cysteine-rich with EGF-like domains 2	Other	other	Common_Between_RNAseq_&_Microarray
G13021	Pim3	7	129544794..129547908	3115	4.3727	4.13613	4.31047	4.51795	4.51197	4.79371	4.2731	0.12263	4.60788	0.160967	PIM3	pim-3 oncogene	Other	kinase	Common_Between_RNAseq_&_Microarray
G13023	Mlc1	7	complement(129636392..129656289)	19898	5.9241	5.90761	5.97602	5.29803	5.539	5.25598	5.93591	0.0356986	5.36434	0.152717	MLC1	megalencephalic leukoencephalopathy with subcortical cysts 1	Plasma Membrane	transporter	Common_Between_RNAseq_&_Microarray
G13025	Panx2	7	129728892..129738977	10086	4.03748	3.87642	3.7657	4.06799	4.16374	4.22019	3.8932	0.136666	4.15064	0.076943	PANX2	pannexin 2	Plasma Membrane	transporter	RNAseq_Specific
G13026	Trabd	7	129744197..129755170	10974	4.86389	4.71017	4.73876	4.92191	4.9257	4.93064	4.77094	0.0817537	4.92608	0.00438024	TRABD	TraB domain containing	Extracellular Space	other	Common_Between_RNAseq_&_Microarray
G13027	Tubgcp6	7	complement(129766841..129787647)	20807	3.19283	3.23708	3.09409	3	3	3	3.17466	0.0732004	3	0	TUBGCP6	tubulin, gamma complex associated protein 6	Cytoplasm	other	Common_Between_RNAseq_&_Microarray
G13028	Hdac10	7	complement(129788136..129793226)	5091	4.91573	4.58227	4.85025	4.19915	4.24434	4.11046	4.78275	0.176683	4.18465	0.0681106	HDAC10	histone deacetylase 10	Nucleus	transcription regulator	RNAseq_Specific
G13029	Mapk12	7	complement(129795269..129805662)	10394	4.19404	3.67998	3.87984	4.31879	4.16333	4.19482	3.91795	0.259138	4.22565	0.0821851	MAPK12	mitogen-activated protein kinase 12	Cytoplasm	kinase	RNAseq_Specific
G1303	Bax	1	complement(102530748..102536167)	5420	4.87158	4.74361	4.84171	4.35797	4.58406	4.76524	4.81897	0.0669447	4.56909	0.204049	BAX	BCL2-associated X protein	Cytoplasm	transporter	RNAseq_Specific
G13030	Mapk11	7	complement(129807476..129814393)	6918	5.40492	5.25504	5.42217	5.17963	4.99681	5.11118	5.36071	0.0919185	5.09587	0.0923665	MAPK11	mitogen-activated protein kinase 11	Cytoplasm	kinase	RNAseq_Specific
G13031	Plxnb2	7	complement(129821099..129836927)	15829	4.94456	4.85917	4.61913	4.70465	4.55493	4.63199	4.80762	0.16873	4.63052	0.0748713	PLXNB2	plexin B2	Plasma Membrane	transmembrane receptor	Common_Between_RNAseq_&_Microarray
G13033	Dennd6b	7	complement(129850713..129862537)	11825	4.2992	4.25002	4.34737	4.05414	4.04628	4.11755	4.29887	0.0486752	4.07266	0.039074	DENND6B	DENN/MADD domain containing 6B	Other	other	Common_Between_RNAseq_&_Microarray
G13034	Ppp6r2	7	129912709..129945225	32517	5.56986	5.49856	5.44192	5.32693	5.24726	5.20449	5.50345	0.0641054	5.25956	0.0621383	PPP6R2	protein phosphatase 6, regulatory subunit 2	Cytoplasm	other	Common_Between_RNAseq_&_Microarray
G13035	Sbf1	7	complement(129946917..129973401)	26485	4.16937	4.06799	4.02381	4.27631	3.99558	4.1117	4.08705	0.0746295	4.12786	0.141062	SBF1	SET binding factor 1	Plasma Membrane	phosphatase	Common_Between_RNAseq_&_Microarray
G13036	Adm2	7	129982187..129983942	1756	3	3	3	3	3	4.15245	3	0	3.38415	0.665369	ADM2	adrenomedullin 2	Extracellular Space	other	RNAseq_Specific
G13038	Lmf2	7	complement(130007321..130011771)	4451	4.39828	4.22442	4.23441	4.359	4.24889	4.31555	4.2857	0.0976183	4.30782	0.0554607	LMF2	lipase maturation factor 2	Other	other	Common_Between_RNAseq_&_Microarray
G13039	Ncaph2	7	130011951..130027604	15654	4.78271	4.64443	4.62937	4.52614	4.39036	4.43611	4.6855	0.0845217	4.45087	0.0690832	NCAPH2	non-SMC condensin II complex, subunit H2	Nucleus	other	Common_Between_RNAseq_&_Microarray
G1304	Dhdh	1	complement(102545589..102555779)	10191	3.24775	3.08732	3.23936	3	3	3	3.19147	0.0902987	3	0	DHDH	dihydrodiol dehydrogenase (dimeric)	Other	enzyme	RNAseq_Specific
G13040	Sco2	7	complement(130027705..130028478)	774	4.67188	4.85373	4.85671	4.6804	4.83418	4.88918	4.7941	0.105859	4.80125	0.108214
G13046	Chkb	7	complement(130089653..130093008)	3356	4.39001	4.40715	4.56313	4.43378	4.54294	4.568	4.45343	0.0953938	4.5149	0.0713656	CHKB	choline kinase beta	Cytoplasm	kinase	Common_Between_RNAseq_&_Microarray
G13048	Mapk8ip2	7	130116132..130123675	7544	6.66633	6.68867	6.44717	6.56605	6.47223	6.54303	6.60072	0.133451	6.52711	0.0488938	MAPK8IP2	mitogen-activated protein kinase 8 interacting protein 2	Cytoplasm	other	RNAseq_Specific
G13049	Arsa	7	complement(130132039..130137458)	5420	4.3123	4.20658	4.14473	4.08937	4.09318	4.11962	4.2212	0.0847346	4.10072	0.0164738	ARSA	arylsulfatase A	Cytoplasm	enzyme	Common_Between_RNAseq_&_Microarray
G1305	Tulp2	1	102553246..102590186	36941	3	3	3	3	3.06245	3.08476	3	0	3.04907	0.043935	TULP2	tubby like protein 2	Other	enzyme	RNAseq_Specific
G13050	Shank3	7	130159261..130217900	58640	3.18726	3.18964	3.1999	3.19045	3.00521	3	3.19227	0.00671668	3.06522	0.108481	Shank3	SH3/ankyrin domain gene 3	Plasma Membrane	other	RNAseq_Specific
G13052	Rabl2a	7	complement(130241551..130250156)	8606	3.92657	3.84613	4.03398	3.67034	3.83808	3.68898	3.93556	0.0942517	3.73247	0.091934	RABL2A	RAB, member of RAS oncogene family-like 2A	Other	enzyme	RNAseq_Specific
G13058	Kif21a	7	complement(131746524..131874044)	127521	5.90364	5.96058	5.69822	6.13771	5.80993	5.77083	5.85415	0.138007	5.90615	0.201483	KIF21A	kinesin family member 21A	Cytoplasm	other	Common_Between_RNAseq_&_Microarray
G1306	Nucb1	1	complement(102559073..102579561)	20489	8.98114	8.80486	8.87894	9.36053	9.39053	9.46948	8.88831	0.0885176	9.40684	0.0562796	NUCB1	nucleobindin 1	Cytoplasm	other	Common_Between_RNAseq_&_Microarray
G13061	Slc2a13	7	complement(132108134..132430525)	322392	3	3.07365	3	3.82288	3.37139	3.55241	3.02455	0.0425208	3.58222	0.22722	SLC2A13	solute carrier family 2 (facilitated glucose transporter), member 13	Plasma Membrane	transporter	Common_Between_RNAseq_&_Microarray
G13062	Lrrk2	7	132531605..132693763	162159	3	3	3	3.07106	3.05553	3	3	0	3.0422	0.0373592	LRRK2	leucine-rich repeat kinase 2	Cytoplasm	kinase	RNAseq_Specific
G13067	Cntn1	7	133085052..133270392	185341	6.52019	6.49656	6.04592	6.58946	6.42911	6.25927	6.35422	0.267258	6.42595	0.165118	CNTN1	contactin 1	Plasma Membrane	enzyme	Common_Between_RNAseq_&_Microarray
G13068	Pdzrn4	7	133539221..133687546	148326	3.99153	4.11422	4.07572	3.19833	3.31377	3.14309	4.06049	0.0627447	3.21839	0.0870952	PDZRN4	PDZ domain containing ring finger 4	Other	other	RNAseq_Specific
G1307	Ppp1r15a	1	complement(102590679..102593734)	3056	4.46608	4.56404	4.83845	5.27378	5.19052	5.57954	4.62286	0.193024	5.34795	0.204842	PPP1R15A	protein phosphatase 1, regulatory subunit 15A	Cytoplasm	other	Common_Between_RNAseq_&_Microarray
G13070	Yaf2	7	complement(134175947..134178051)	2105	5.56255	5.61014	5.71452	5.59872	5.69947	5.5812	5.62907	0.077733	5.62646	0.0638273	YAF2	YY1 associated factor 2	Nucleus	transcription regulator	Common_Between_RNAseq_&_Microarray
G13071	Zcrb1	7	complement(134255943..134269279)	13337	4.35269	4.43677	4.59215	4.53236	4.65363	4.70548	4.46054	0.121489	4.63049	0.0888492	ZCRB1	zinc finger CCHC-type and RNA binding motif 1	Nucleus	other	Common_Between_RNAseq_&_Microarray
G13072	Pphln1	7	134270162..134361035	90874	3.86509	3.89057	3.97278	4.499	4.48138	4.4697	3.90948	0.0562842	4.48336	0.0147515	PPHLN1	periphilin 1	Nucleus	other	Common_Between_RNAseq_&_Microarray
G13073	Prickle1	7	complement(134370195..134389446)	19252	3	3	3	3.04333	3.17696	3.2363	3	0	3.15219	0.0988407	PRICKLE1	prickle homolog 1 (Drosophila)	Nucleus	other	Common_Between_RNAseq_&_Microarray
G13077	Twf1	7	complement(135495110..135507004)	11895	4.64385	4.78271	4.83695	5.03699	5.06832	5.05511	4.75451	0.0995934	5.05347	0.0157269	TWF1	twinfilin actin-binding protein 1	Cytoplasm	kinase	Common_Between_RNAseq_&_Microarray
G13078	Tmem117	7	135545200..136048699	503500	4.17097	4.17576	4.29074	4.32168	4.29	4.22057	4.21249	0.0678104	4.27742	0.0517165	Tmem117	transmembrane protein 117	Cytoplasm	other	Common_Between_RNAseq_&_Microarray
G13080	Nell2	7	complement(136173239..136494641)	321403	6.91014	7.05367	6.72369	6.50526	6.32948	6.25238	6.89584	0.165453	6.36237	0.129607	NELL2	NEL-like 2 (chicken)	Extracellular Space	other	Common_Between_RNAseq_&_Microarray
G13085	Scaf11	7	complement(137439150..137471025)	31876	3.65843	3.7873	3.5438	3.76304	3.65558	3.72486	3.66318	0.121822	3.71449	0.0544726	SCAF11	SR-related CTD-associated factor 11	Nucleus	other	Common_Between_RNAseq_&_Microarray
G13086	Slc38a1	7	complement(137603305..137667386)	64082	4.44773	4.33027	4.03046	4.69244	4.49391	4.72439	4.26949	0.215176	4.63691	0.124874	SLC38A1	solute carrier family 38, member 1	Plasma Membrane	transporter	Common_Between_RNAseq_&_Microarray
G13087	Slc38a2	7	complement(137716131..137728300)	12170	4.87527	5.08312	5.15552	5.61456	5.61383	5.87135	5.03797	0.14548	5.69991	0.148469	SLC38A2	solute carrier family 38, member 2	Plasma Membrane	transporter	Common_Between_RNAseq_&_Microarray
G13091	Pced1b	7	138330915..138468397	137483	3.16414	3.20224	3.14309	3	3	3	3.16982	0.029983	3	0	PCED1B	PC-esterase domain containing 1B	Other	other	RNAseq_Specific
G13097	Pfkm	7	138833721..138857275	23555	7.53361	7.48112	7.23856	6.85671	6.84039	6.68635	7.41776	0.157398	6.79448	0.0939976	PFKM	phosphofructokinase, muscle	Cytoplasm	kinase	Common_Between_RNAseq_&_Microarray
G13098	Asb8	7	complement(138859490..138867223)	7734	5.16341	5.16704	5.21577	5.08418	5.08951	5.10846	5.18207	0.0292394	5.09405	0.0127609	ASB8	ankyrin repeat and SOCS box containing 8	Nucleus	transcription regulator	Common_Between_RNAseq_&_Microarray
G13099	MGC114464	7	138898271..138899670	1400	4.93963	5.18658	5.07734	5.05555	5.09418	5.22698	5.06785	0.123747	5.12557	0.0899257	C12orf68	chromosome 12 open reading frame 68	Cytoplasm	other	Common_Between_RNAseq_&_Microarray
G1310	Bcat2	1	102633422..102650872	17451	4.02205	3.15691	4.09996	3.96126	4.05934	3.95802	3.75964	0.523429	3.99287	0.0575843	BCAT2	branched chain amino-acid transaminase 2, mitochondrial	Cytoplasm	enzyme	Common_Between_RNAseq_&_Microarray
G13110	Rpap3	7	complement(139359860..139386634)	26775	4.88017	4.87207	5.0442	4.75754	4.75224	4.60259	4.93215	0.0971264	4.70412	0.0879695	RPAP3	RNA polymerase II associated protein 3	Other	enzyme	Common_Between_RNAseq_&_Microarray
G13112	Rapgef3	7	complement(139423980..139445473)	21494	3.57316	3.25381	3.53638	3.09664	3.07794	3.13161	3.45445	0.174731	3.10206	0.027242	RAPGEF3	Rap guanine nucleotide exchange factor (GEF) 3	Nucleus	other	RNAseq_Specific
G13113	Slc48a1	7	139463280..139471081	7802	5.69502	5.65578	5.52309	5.26407	5.38263	5.27378	5.62463	0.0900985	5.30683	0.0658274	SLC48A1	solute carrier family 48 (heme transporter), member 1	Other	other	Common_Between_RNAseq_&_Microarray
G13114	Hdac7	7	complement(139472968..139490046)	17079	3.46192	3.35948	3.44016	3.2763	3.19675	3.32965	3.42052	0.0539722	3.26757	0.0668757	HDAC7	histone deacetylase 7	Nucleus	transcription regulator	RNAseq_Specific
G13116	Tmem106c	7	139636746..139642341	5596	5.26686	5.11055	5.21286	4.68909	4.72194	4.71482	5.19676	0.0793904	4.70862	0.0172819	TMEM106C	transmembrane protein 106C	Other	other	RNAseq_Specific
G13117	Col2a1	7	complement(139646995..139675750)	28756	3.13735	3.03982	3.1999	3	3	3	3.12569	0.0806723	3	0	COL2A1	collagen, type II, alpha 1	Extracellular Space	other	RNAseq_Specific
G13118	Atf1	7	139692651..139735614	42964	3.71827	3.78888	3.92372	3.98334	3.93743	4.01177	3.81029	0.104382	3.97751	0.0375135	ATF1	activating transcription factor 1	Nucleus	transcription regulator	Common_Between_RNAseq_&_Microarray
G13120	Mettl7a	7	139783755..139790601	6847	4.13367	4.10962	4.359	4.03971	3.67318	3.95614	4.20076	0.137564	3.88968	0.192089	METTL7A	methyltransferase like 7A	Other	other	Common_Between_RNAseq_&_Microarray
G13122	Slc11a2	7	complement(139837654..139870639)	32986	3.88717	3.9322	3.77313	3.99693	3.96173	3.94871	3.86417	0.0819916	3.96912	0.0249438	SLC11A2	solute carrier family 11 (proton-coupled divalent metal ion transporter), member 2	Plasma Membrane	transporter	Common_Between_RNAseq_&_Microarray
G13123	Letmd1	7	139913936..139923419	9484	4.95369	4.87453	4.97038	4.86067	4.80973	4.80614	4.93287	0.0512034	4.82551	0.0304963	LETMD1	LETM1 domain containing 1	Plasma Membrane	other	Common_Between_RNAseq_&_Microarray
G13124	Csrnp2	7	complement(139923806..139939644)	15839	3.02042	3.04682	3.17696	3.11172	3	3.01595	3.0814	0.0838029	3.04256	0.0604223	CSRNP2	cysteine-serine-rich nuclear protein 2	Nucleus	transcription regulator	RNAseq_Specific
G13125	Tfcp2	7	complement(139946315..139988265)	41951	3.48137	3.4295	3.38041	3.30576	3.31812	3.12503	3.43043	0.0504864	3.24964	0.108089	TFCP2	transcription factor CP2	Nucleus	transcription regulator	RNAseq_Specific
G13126	Pou6f1	7	complement(140008707..140015389)	6683	3.01147	3	3.02307	3.34106	3.2077	3.38386	3.01151	0.0115355	3.31087	0.0918754	POU6F1	POU class 6 homeobox 1	Nucleus	transcription regulator	Common_Between_RNAseq_&_Microarray
G13127	Dazap2	7	140043812..140048948	5137	6.14893	6.04188	6.09814	5.76831	5.86901	5.76367	6.09632	0.0535509	5.80033	0.0595217	Dazap2	DAZ associated protein 2	Nucleus	other	Common_Between_RNAseq_&_Microarray
G13132	Slc4a8	7	140201594..140275775	74182	5.15673	5.10951	5.11035	4.74982	4.65906	4.66959	5.12553	0.0270273	4.69282	0.0496407	SLC4A8	solute carrier family 4, sodium bicarbonate cotransporter, member 8	Plasma Membrane	transporter	RNAseq_Specific
G13137	Acvrl1	7	140571223..140588082	16860	3	3	3	3	3	3.07106	3	0	3.02369	0.0410275	ACVRL1	activin A receptor type II-like 1	Plasma Membrane	kinase	RNAseq_Specific
G13139	Acvr1b	7	140617642..140659124	41483	4.22442	4.25002	3.7352	3.93128	3.67715	3.629	4.06988	0.290124	3.74581	0.162417	ACVR1B	activin A receptor, type IB	Plasma Membrane	kinase	RNAseq_Specific
G1314	Rasip1	1	102689553..102700426	10874	3.84864	3.8547	3.9737	3.84161	3.91415	4.10501	3.89235	0.0705188	3.95359	0.136055	Rasip1	Ras interacting protein 1	Other	other	Common_Between_RNAseq_&_Microarray
G13141	Nr4a1	7	140713176..140721070	7895	3	3.40039	4.08639	3.80954	3.24546	4.16174	3.49559	0.549416	3.73891	0.462206	NR4A1	nuclear receptor subfamily 4, group A, member 1	Nucleus	ligand-dependent nuclear receptor	Common_Between_RNAseq_&_Microarray
G13142	ATG101	7	140730296..140739408	9113	4.8263	4.83468	4.84121	4.63374	4.74604	4.82936	4.83407	0.00747538	4.73638	0.0981654
G13172	Eif4b	7	141476183..141497938	21756	6.32948	6.32157	6.3087	5.88252	5.81788	5.76274	6.31992	0.010487	5.82105	0.0599521	EIF4B	eukaryotic translation initiation factor 4B	Cytoplasm	translation regulator	Common_Between_RNAseq_&_Microarray
G13173	Tenc1	7	141503820..141517146	13327	3.45928	3.37139	3.38664	3.41266	3.14065	3.27033	3.40577	0.0469644	3.27454	0.136055	Tenc1	tensin like C1 domain containing phosphatase (tensin 2)	Plasma Membrane	other	Common_Between_RNAseq_&_Microarray
G13174	Spryd3	7	complement(141517639..141534847)	17209	6.78234	6.68937	6.6872	6.43788	6.36858	6.37268	6.71964	0.0543167	6.39305	0.0388776	SPRYD3	SPRY domain containing 3	Other	other	RNAseq_Specific
G13177	Csad	7	complement(141579062..141607052)	27991	3.93128	3.81212	4.00144	3.64984	3.53638	3.57255	3.91495	0.0957081	3.58626	0.0579619	CSAD	cysteine sulfinic acid decarboxylase	Cytoplasm	enzyme	Common_Between_RNAseq_&_Microarray
G13178	Zfp740	7	141611103..141614789	3687	3.76996	3.84363	3.60374	3.62141	3.65614	3.62024	3.73911	0.122882	3.6326	0.0203978
G13181	Mfsd5	7	141678906..141681186	2281	4.38553	4.31084	4.36077	4.81178	4.89139	5.01502	4.35238	0.0380438	4.90606	0.102408	MFSD5	major facilitator superfamily domain containing 5	Other	transporter	Common_Between_RNAseq_&_Microarray
G13183	Pfdn5	7	141720703..141725439	4737	6.84516	6.91619	7.05416	6.52019	6.84591	6.62724	6.9385	0.106271	6.66444	0.16602	PFDN5	prefoldin subunit 5	Nucleus	transcription regulator	Common_Between_RNAseq_&_Microarray
G13184	Myg1	7	141725674..141732906	7233	5.28992	5.36033	5.49185	5.19289	5.42958	5.44656	5.3807	0.102493	5.35634	0.14181	C12orf10	chromosome 12 open reading frame 10	Other	other	Common_Between_RNAseq_&_Microarray
G13185	Aaas	7	complement(141733241..141751976)	18736	3.83709	3.72486	3.96173	3.8954	3.82696	4.03971	3.84123	0.11849	3.92069	0.108607	AAAS	achalasia, adrenocortical insufficiency, alacrimia	Nucleus	other	RNAseq_Specific
G13189	Prr13	7	141857064..141860364	3301	5.29985	5.35699	5.45416	5.79051	5.99072	5.99909	5.37033	0.0780141	5.92677	0.118084	PRR13	proline rich 13	Nucleus	other	Common_Between_RNAseq_&_Microarray
G1319	Car11	1	102761012..102766123	5112	5.00921	4.92191	5.13966	4.5598	4.7963	4.70271	5.02359	0.109585	4.68627	0.119104	CA11	carbonic anhydrase XI	Extracellular Space	enzyme	Common_Between_RNAseq_&_Microarray
G13190	PCBP2	7	141870629..141894027	23399	6.96644	7.01717	7.00503	6.80303	6.92769	6.85011	6.99621	0.0264924	6.86028	0.0629466	PCBP2	poly(rC) binding protein 2	Nucleus	other	Common_Between_RNAseq_&_Microarray
G13191	Map3k12	7	complement(141894814..141901161)	6348	5.54272	5.44987	5.52073	5.32151	5.28936	5.27973	5.50444	0.0485245	5.29687	0.0218799	MAP3K12	mitogen-activated protein kinase kinase kinase 12	Cytoplasm	kinase	Common_Between_RNAseq_&_Microarray
G13192	Tarbp2	7	141913739..141918852	5114	4.63809	4.67559	4.64559	4.33814	4.46608	4.39481	4.65309	0.019844	4.39968	0.0641084	TARBP2	TAR (HIV-1) RNA binding protein 2	Nucleus	other	Common_Between_RNAseq_&_Microarray
G13193	Npff	7	complement(141919080..141919868)	789	4.10835	4.56709	4.82148	3	3	3	4.49897	0.361415	3	0	Npff	neuropeptide FF-amide peptide precursor	Other	other	Common_Between_RNAseq_&_Microarray
G13195	Atp5g2	7	complement(142056432..142064809)	8378	7.2892	7.24121	7.26509	6.73159	7.1754	7.04832	7.26517	0.0239937	6.9851	0.228557	ATP5G2	ATP synthase, H+ transporting, mitochondrial Fo complex, subunit C2 (subunit 9)	Cytoplasm	transporter	Common_Between_RNAseq_&_Microarray
G1320	Dbp	1	102766762..102771674	4913	4.52832	4.42877	4.58075	3.00433	3.14554	3	4.51261	0.0772014	3.04996	0.0828097	DBP	D site of albumin promoter (albumin D-box) binding protein	Nucleus	transcription regulator	Common_Between_RNAseq_&_Microarray
G1321	Sphk2	1	complement(102771805..102776109)	4305	4.48845	4.45429	4.30757	4.46251	4.41799	4.53173	4.41677	0.0960976	4.47074	0.057315	SPHK2	sphingosine kinase 2	Cytoplasm	kinase	Common_Between_RNAseq_&_Microarray
G13210	Cbx5	7	complement(142605589..142623004)	17416	5.08162	5.16783	5.21828	4.86116	5.09078	4.96993	5.15591	0.0691044	4.97396	0.114861	CBX5	chromobox homolog 5	Nucleus	transcription regulator	Common_Between_RNAseq_&_Microarray
G13211	HNRNPA1	7	142647376..142652966	5591	8.21773	8.26102	8.1261	7.97569	8.00426	7.8722	8.20162	0.0688874	7.95071	0.0694783	HNRNPA1	heterogeneous nuclear ribonucleoprotein A1	Nucleus	other	RNAseq_Specific
G13214	Copz1	7	142680779..142706987	26209	6.75502	6.81455	6.72192	6.51412	6.69787	6.58946	6.76383	0.0469391	6.60048	0.0923666	COPZ1	coatomer protein complex, subunit zeta 1	Cytoplasm	transporter	Common_Between_RNAseq_&_Microarray
G13217	Zfp385a	7	complement(142719645..142739423)	19779	3.87443	3.715	3.91415	4.00773	4.06452	4.20502	3.83453	0.1054	4.09243	0.101561	ZNF385A	zinc finger protein 385A	Nucleus	other	RNAseq_Specific
G13218	Itga5	7	complement(142750121..142773323)	23203	3	3	3	3	3	3.17855	3	0	3.05952	0.103088	ITGA5	integrin, alpha 5 (fibronectin receptor, alpha polypeptide)	Plasma Membrane	transmembrane receptor	RNAseq_Specific
G1322	Rpl18	1	102779721..102782381	2661	7.70808	7.56188	7.68827	7.1613	7.43181	7.5525	7.65275	0.0793148	7.38187	0.200323	RPL18	ribosomal protein L18	Cytoplasm	other	Common_Between_RNAseq_&_Microarray
G13222	Pde1b	7	142898973..142925732	26760	5.15269	5.2041	5.06509	5.00157	5.03743	5.07413	5.14063	0.0702872	5.03771	0.0362806	PDE1B	phosphodiesterase 1B, calmodulin-dependent	Cytoplasm	enzyme	Common_Between_RNAseq_&_Microarray
G13223	Ppp1r1a	7	complement(142925731..142933381)	7651	4.88943	4.89578	5.14904	5.29065	5.55105	5.64918	4.97808	0.148088	5.49696	0.185284	PPP1R1A	protein phosphatase 1, regulatory (inhibitor) subunit 1A	Cytoplasm	phosphatase	Common_Between_RNAseq_&_Microarray
G13226	Calcoco1	7	complement(143218503..143233218)	14716	4.98618	4.85174	4.82327	4.27294	4.2959	4.2752	4.88706	0.0870109	4.28135	0.012657	CALCOCO1	calcium binding and coiled-coil domain 1	Nucleus	transcription regulator	Common_Between_RNAseq_&_Microarray
G13229	Aasdhppt	8	complement(1433781..1444562)	10782	5.14047	5.14088	5.28936	5.29967	5.32223	5.34921	5.19024	0.085845	5.3237	0.0248027	AASDHPPT	aminoadipate-semialdehyde dehydrogenase-phosphopantetheinyl transferase	Cytoplasm	enzyme	Common_Between_RNAseq_&_Microarray
G13231	Msantd4	8	1497145..1507753	10609	5.16402	5.3188	5.23372	5.37396	5.30039	5.24726	5.23885	0.0775188	5.3072	0.0636224	MSANTD4	Myb/SANT-like DNA-binding domain containing 4 with coiled-coils	Nucleus	other	Common_Between_RNAseq_&_Microarray
G13232	Gria4	8	complement(1542037..2069626)	527590	3.06503	3.36999	3.26209	3.32604	3.41197	3.02042	3.23237	0.15464	3.25281	0.205791	GRIA4	glutamate receptor, ionotropic, AMPA 4	Plasma Membrane	ion channel	Common_Between_RNAseq_&_Microarray
G13236	Casp1	8	2627973..2636854	8882	3	3	3	3	3	3.05291	3	0	3.01764	0.0305453	CASP1	caspase 1, apoptosis-related cysteine peptidase	Cytoplasm	peptidase	RNAseq_Specific
G13237	Casp4	8	2658133..2673885	15753	3.38456	3.04682	3.34106	3.55854	3.55057	3.64467	3.25748	0.183727	3.5846	0.0521812	CASP4	caspase 4, apoptosis-related cysteine peptidase	Cytoplasm	peptidase	Common_Between_RNAseq_&_Microarray
G13248	ENSRNOG00000048296	8	complement(4118869..4219428)	100560	6.36202	6.45713	6.50414	6.59529	6.70694	6.58391	6.4411	0.0724027	6.62872	0.0679863
G13255	Dync2h1	8	complement(5224356..5436622)	212267	3.05464	3.00971	3.08306	3	3	3	3.04914	0.0369816	3	0	DYNC2H1	dynein, cytoplasmic 2, heavy chain 1	Cytoplasm	other	RNAseq_Specific
G13256	Dcun1d5	8	5444079..5465187	21109	5.50286	5.52309	5.64443	5.76274	5.82985	5.77254	5.55679	0.0765676	5.78838	0.0362482	DCUN1D5	DCN1, defective in cullin neddylation 1, domain containing 5	Other	other	Common_Between_RNAseq_&_Microarray
G1326	ENSRNOG00000021048	1	102862636..102871754	9119	5.1228	4.78667	4.9006	4.45331	4.43244	4.602	4.93669	0.170947	4.49592	0.092459	LOC691056	similar to 5E5 antigen	Other	other	RNAseq_Specific
G13268	Tmem123	8	5995680..5999126	3447	3.0633	3.14554	3.21778	3.20224	3.32389	3.32604	3.14221	0.0772934	3.28406	0.0708663	TMEM123	transmembrane protein 123	Plasma Membrane	other	Common_Between_RNAseq_&_Microarray
G13269	Birc2	8	complement(6015753..6033822)	18070	3.82032	3.78104	4.08682	4.14473	3.9459	3.84964	3.89606	0.166368	3.98009	0.150484	BIRC2	baculoviral IAP repeat containing 2	Cytoplasm	enzyme	Common_Between_RNAseq_&_Microarray
G1327	Cyth2	1	complement(102875334..102882171)	6838	5.2266	5.23621	5.36926	5.1141	5.34851	5.40492	5.27735	0.0797331	5.28918	0.154225	CYTH2	cytohesin 2	Cytoplasm	other	Common_Between_RNAseq_&_Microarray
G13271	Yap1	8	complement(6138909..6202218)	63310	3.4147	3.38318	3.48137	3.19675	3.46779	3.15367	3.42641	0.0501337	3.27274	0.170287	Yap1	yes-associated protein 1	Nucleus	transcription regulator	RNAseq_Specific
G13272	9230110C19Rik	8	complement(6217032..6234606)	17575	3.48908	3.30137	3.3949	3	3.08306	3	3.39512	0.0938534	3.02769	0.0479527
G13273	RGD1563556	8	complement(6254657..6302976)	48320	3.2386	3.3949	3.33035	3.44282	3.42748	3.15205	3.32128	0.0785392	3.34078	0.163626	KIAA1377	KIAA1377	Other	other	RNAseq_Specific
G13283	Jrkl	8	complement(11843756..11845330)	1575	3.06762	3.13161	3.06762	3.16575	3.19675	3.17934	3.08895	0.0369409	3.18061	0.0155417	JRKL	jerky homolog-like (mouse)	Nucleus	other	RNAseq_Specific
G13284	Ccdc82	8	11846685..11885449	38765	4.32992	4.1167	4.05632	3.82696	3.92844	3.77524	4.16765	0.143741	3.84355	0.077935	CCDC82	coiled-coil domain containing 82	Other	other	RNAseq_Specific
G13286	Mtmr2	8	12233929..12284288	50360	4.2666	4.33814	4.26885	4.4311	4.43778	4.41698	4.2912	0.0406721	4.42862	0.0106198	MTMR2	myotubularin related protein 2	Cytoplasm	phosphatase	Common_Between_RNAseq_&_Microarray
G13287	Cep57	8	complement(12285708..12305367)	19660	4.20658	4.18849	4.26435	4.10333	4.13162	3.93458	4.21981	0.0396222	4.05651	0.106539	CEP57	centrosomal protein 57kDa	Cytoplasm	other	Common_Between_RNAseq_&_Microarray
G13288	Fam76b	8	12306043..12324965	18923	3.68898	3.66299	3.77208	3.75664	3.63368	3.58101	3.70802	0.0569791	3.65711	0.0901301	Fam76b	family with sequence similarity 76, member B	Other	other	Common_Between_RNAseq_&_Microarray
G13289	Sesn3	8	12768653..12818203	49551	3.89493	4.01312	3.53267	3.93269	3.83455	3.79559	3.81357	0.250346	3.85428	0.0706451	SESN3	sestrin 3	Extracellular Space	other	Common_Between_RNAseq_&_Microarray
G1329	Grwd1	1	complement(102892342..102898043)	5702	3.52703	3.52017	3.43815	3.31377	3.3644	3.45928	3.49512	0.0494518	3.37915	0.0738663	GRWD1	glutamate-rich WD repeat containing 1	Nucleus	other	RNAseq_Specific
G13290	Endod1	8	complement(12846527..12873120)	26594	4.62675	4.81256	4.29516	4.99432	4.60762	4.72846	4.57816	0.2621	4.7768	0.197825	ENDOD1	endonuclease domain containing 1	Extracellular Space	enzyme	Common_Between_RNAseq_&_Microarray
G13292	Cwc15	8	12939501..12950303	10803	5.1141	5.10091	5.4129	5.27023	5.43142	5.38263	5.2093	0.176445	5.36143	0.0826577	CWC15	CWC15 spliceosome-associated protein homolog (S. cerevisiae)	Nucleus	other	Common_Between_RNAseq_&_Microarray
G13299	Gpr83	8	13306230..13316717	10488	3	3	3	3.69234	3.80954	4.23441	3	0	3.9121	0.285219	GPR83	G protein-coupled receptor 83	Plasma Membrane	G-protein coupled receptor	RNAseq_Specific
G133	Epb41l2	1	complement(22362882..22443605)	80724	3.83455	3.84715	3.81057	3.81675	3.75878	3.71664	3.83076	0.0185828	3.76406	0.0502639	EPB41L2	erythrocyte membrane protein band 4.1-like 2	Plasma Membrane	other	Common_Between_RNAseq_&_Microarray
G13302	Panx1	8	complement(13507955..13547151)	39197	3.64121	3.59182	3.5798	3.77681	3.83403	3.84613	3.60428	0.0325418	3.81899	0.0370247	PANX1	pannexin 1	Plasma Membrane	transporter	Common_Between_RNAseq_&_Microarray
G13305	Vstm5	8	13735551..13755647	20097	3	3	3	3	3	3.01147	3	0	3.00382	0.00662359	VSTM5	V-set and transmembrane domain containing 5	Other	other	RNAseq_Specific
G13306	Med17	8	complement(13759090..13774832)	15743	4.4749	4.34204	4.38691	4.12002	4.14799	4.0804	4.40128	0.067584	4.11614	0.0339617	MED17	mediator complex subunit 17	Nucleus	transcription regulator	Common_Between_RNAseq_&_Microarray
G13307	RGD1309534	8	complement(13778080..13800657)	22578	3.55914	3.54195	3.5289	3.15691	3.33249	3.18093	3.54333	0.0151688	3.22344	0.0951967	C11orf54	chromosome 11 open reading frame 54	Nucleus	other	Common_Between_RNAseq_&_Microarray
G13308	Taf1d	8	13802188..13810920	8733	4.18056	4.09573	4.21554	4.42809	4.36147	4.23863	4.16394	0.0616078	4.34273	0.096109	TAF1D	TATA box binding protein (TBP)-associated factor, RNA polymerase I, D, 41kDa	Nucleus	other	Common_Between_RNAseq_&_Microarray
G1331	Kdelr1	1	102938310..102949196	10887	6.48599	6.40352	6.50526	6.31098	6.49537	6.35596	6.46492	0.0540403	6.38744	0.0961395	KDELR1	KDEL (Lys-Asp-Glu-Leu) endoplasmic reticulum protein retention receptor 1	Cytoplasm	transporter	Common_Between_RNAseq_&_Microarray
G13310	5830418K08Rik	8	complement(13810931..13846024)	35094	3.37486	3.30284	3.77524	3.22321	3.09664	3.00792	3.48431	0.254514	3.10926	0.1082
G13315	Slc36a4	8	14330657..14360233	29577	3.35738	3.28076	3.00433	3.56587	3.30284	3.32965	3.21415	0.18571	3.39945	0.144746	SLC36A4	solute carrier family 36 (proton/amino acid symporter), member 4	Other	transporter	RNAseq_Specific
G13319	ENSRNOG00000031522	8	14897700..14902804	5105	4.29884	4.4109	4.19008	4.69411	4.4497	4.42338	4.29994	0.110413	4.5224	0.149293	LOC689840	LRRGT00142	Other	other	RNAseq_Specific
G13322	ENSRNOG00000031660	8	complement(16353646..16421352)	67707	7.63582	7.69209	7.63803	7.96134	7.86522	7.60941	7.65531	0.0318691	7.81199	0.181903	LOC500948	LRRGT00073	Other	other	RNAseq_Specific
G13326	Chordc1	8	17494921..17518882	23962	4.95577	4.85671	5.31699	5.55674	5.4376	5.55765	5.04316	0.242265	5.51733	0.0690502	CHORDC1	cysteine and histidine-rich domain (CHORD) containing 1	Other	other	Common_Between_RNAseq_&_Microarray
G1333	Tmem143	1	102962983..102979034	16052	3.76145	3.63717	3.5444	3.39008	3.39833	3.48779	3.64767	0.108906	3.4254	0.0541917	TMEM143	transmembrane protein 143	Cytoplasm	other	Common_Between_RNAseq_&_Microarray
G13367	Zfp317	8	19964735..19983504	18770	3.06503	3	3	3	3.02836	3.03896	3.02168	0.0375427	3.02244	0.0201421	ZNF317	zinc finger protein 317	Nucleus	other	RNAseq_Specific
G1337	Nomo1	1	103100473..103152080	51608	6.45917	6.2804	6.15512	6.67391	6.56491	6.59276	6.29823	0.152809	6.61052	0.0566291	NOMO1 (includes others)	NODAL modulator 1	Plasma Membrane	other	Common_Between_RNAseq_&_Microarray
G1339	Abcc8	1	complement(103194473..103275523)	81051	3.18408	3	3.08133	3	3	3	3.08847	0.0922496	3	0	ABCC8	ATP-binding cassette, sub-family C (CFTR/MRP), member 8	Plasma Membrane	transporter	RNAseq_Specific
G13395	Zfp426	8	complement(21534980..21550452)	15473	3.58521	3.62783	3.69902	3.41807	3.62726	3.52017	3.63735	0.0574972	3.52183	0.104608	ZNF426	zinc finger protein 426	Nucleus	other	RNAseq_Specific
G13396	Zfp266	8	complement(21569186..21580886)	11701	4.65191	4.62354	4.6282	4.3224	4.40986	4.09151	4.63455	0.0152117	4.27459	0.164476	ZNF266	zinc finger protein 266	Nucleus	other	Common_Between_RNAseq_&_Microarray
G13398	Zfp846	8	21667380..21674450	7071	3.83302	4.06626	4.11379	3.9322	4.1312	3.87395	4.00436	0.150275	3.97912	0.13489	ZNF846	zinc finger protein 846	Other	other	Common_Between_RNAseq_&_Microarray
G134	Akap7	1	22621734..22744656	122923	5.31898	5.46464	5.43376	5.03213	5.08269	5.05097	5.40579	0.07675	5.05526	0.0255541	AKAP7	A kinase (PRKA) anchor protein 7	Plasma Membrane	other	Common_Between_RNAseq_&_Microarray
G13400	Ubl5	8	21719386..21721099	1714	5.8107	5.80361	5.89057	5.36243	5.73335	5.6327	5.83496	0.0482887	5.57616	0.191815	UBL5	ubiquitin-like 5	Cytoplasm	other	Common_Between_RNAseq_&_Microarray
G13401	Pin1	8	21725297..21736676	11380	6.41548	6.34029	6.36745	6.26125	6.396	6.39163	6.37441	0.0380739	6.34962	0.0765673	PIN1	peptidylprolyl cis/trans isomerase, NIMA-interacting 1	Nucleus	enzyme	Common_Between_RNAseq_&_Microarray
G13402	Olfm2	8	complement(21740369..21799373)	59005	5.21984	4.96691	4.99521	4.64502	4.71565	4.76074	5.06065	0.138582	4.70714	0.0583295	OLFM2	olfactomedin 2	Cytoplasm	other	RNAseq_Specific
G13405	A230050P20Rik	8	21946553..21952190	5638	4.69132	4.49708	4.66447	4.45923	4.41698	4.57924	4.61763	0.105253	4.48515	0.0841788
G13406	Angptl6	8	complement(21951839..21958144)	6306	3	3	3.01595	3	3.03455	3.20458	3.00532	0.00921071	3.07971	0.10951	ANGPTL6	angiopoietin-like 6	Extracellular Space	other	RNAseq_Specific
G13407	Ppan	8	21962180..21966157	3978	4.04715	4.1349	4.29258	4.48877	4.58046	4.64646	4.15821	0.124361	4.5719	0.0791919	Ppan	peter pan homolog (Drosophila)	Other	other	Common_Between_RNAseq_&_Microarray
G13408	Eif3g	8	complement(21967952..21971979)	4028	6.77781	6.74167	6.73681	6.69689	6.82184	6.88111	6.7521	0.0224042	6.79995	0.0940382	EIF3G	eukaryotic translation initiation factor 3, subunit G	Cytoplasm	translation regulator	Common_Between_RNAseq_&_Microarray
G13409	Dnmt1	8	complement(21978830..22024656)	45827	3.71883	3.74865	3.45404	3.37486	3.27405	3.30576	3.64051	0.162172	3.31822	0.0515456	DNMT1	DNA (cytosine-5-)-methyltransferase 1	Nucleus	enzyme	Common_Between_RNAseq_&_Microarray
G13412	Mrpl4	8	22078081..22084096	6016	4.69744	4.73443	4.77029	4.58557	4.76657	4.63779	4.73405	0.0364273	4.66331	0.0931597	MRPL4	mitochondrial ribosomal protein L4	Cytoplasm	other	Common_Between_RNAseq_&_Microarray
G13419	Fdx1l	8	complement(22143206..22148122)	4917	4.75835	4.74226	5.10281	5.13966	5.11013	5.36577	4.86781	0.203677	5.20519	0.139848	FDX1L	ferredoxin 1-like	Cytoplasm	transporter	Common_Between_RNAseq_&_Microarray
G13420	Raver1	8	complement(22148766..22168037)	19272	4.60524	4.50567	4.62762	4.52081	4.43378	4.60524	4.57951	0.0649215	4.51994	0.0857363	RAVER1	ribonucleoprotein, PTB-binding 1	Nucleus	other	RNAseq_Specific
G13422	Cdc37	8	complement(22217096..22229971)	12876	6.70577	6.62724	6.61029	6.62731	6.62971	6.69404	6.64776	0.0509444	6.65035	0.0378554	CDC37	cell division cycle 37	Cytoplasm	other	Common_Between_RNAseq_&_Microarray
G13424	Keap1	8	complement(22306484..22313655)	7172	5.56301	5.49824	5.44059	5.28992	5.25598	5.26593	5.50061	0.0612401	5.27061	0.0174448	KEAP1	kelch-like ECH-associated protein 1	Cytoplasm	transcription regulator	Common_Between_RNAseq_&_Microarray
G13426	Atg4d	8	22344081..22353967	9887	3.99919	3.91847	4.13777	4.03705	4.07614	4.22095	4.01848	0.110918	4.11138	0.0968813	Atg4d	autophagy related 4D, cysteine peptidase	Other	other	RNAseq_Specific
G13427	Kri1	8	complement(22354134..22368139)	14006	4.38553	4.47229	4.51071	4.33635	4.35585	4.31338	4.45617	0.0641236	4.33519	0.0212615
G13429	Slc44a2	8	22422933..22439983	17051	4.34843	4.2752	4.3449	4.22289	4.28556	4.39793	4.32284	0.0412965	4.30213	0.0886872	SLC44A2	solute carrier family 44 (choline transporter), member 2	Extracellular Space	transporter	Common_Between_RNAseq_&_Microarray
G13430	Ilf3	8	22478044..22494771	16728	5.31971	5.23563	5.18063	4.87722	4.81894	4.95671	5.24532	0.0700467	4.88429	0.0691553	ILF3	interleukin enhancer binding factor 3, 90kDa	Nucleus	transcription regulator	RNAseq_Specific
G13431	Qtrt1	8	22501169..22508439	7271	3.19045	3.14554	3.40379	3.12006	3.0633	3.14554	3.24659	0.137978	3.10964	0.0421015	QTRT1	queuine tRNA-ribosyltransferase 1	Cytoplasm	enzyme	RNAseq_Specific
G13432	Dnm2	8	22513045..22594143	81099	4.67786	4.61384	4.57955	4.76339	4.64328	4.76949	4.62375	0.0498988	4.72539	0.071168	DNM2	dynamin 2	Plasma Membrane	enzyme	RNAseq_Specific
G13433	Tmed1	8	complement(22594535..22597120)	2586	3.89396	3.70178	3.84161	4.08682	4.17176	4.22712	3.81245	0.099351	4.1619	0.0706662	TMED1	transmembrane emp24 protein transport domain containing 1	Extracellular Space	transporter	Common_Between_RNAseq_&_Microarray
G13435	Carm1	8	22631820..22676514	44695	4.3463	4.40681	4.37861	4.49231	4.52237	4.60584	4.37724	0.0302775	4.54017	0.0588189	CARM1	coactivator-associated arginine methyltransferase 1	Nucleus	transcription regulator	Common_Between_RNAseq_&_Microarray
G13436	Yipf2	8	complement(22675736..22679913)	4178	5.02284	4.95671	5.12032	4.92427	5.01033	4.89938	5.03329	0.0823066	4.94466	0.0582205	YIPF2	Yip1 domain family, member 2	Cytoplasm	other	RNAseq_Specific
G13437	RGD1309188	8	22679828..22682797	2970	4.86962	5.0405	4.9761	5.14965	5.2264	5.19091	4.96207	0.086303	5.18899	0.0384129	C19orf52	chromosome 19 open reading frame 52	Other	other	Common_Between_RNAseq_&_Microarray
G13438	Smarca4	8	22702277..22793519	91243	5.19328	5.13106	4.93705	5.18182	5.08375	5.0627	5.08713	0.133646	5.10942	0.063574	SMARCA4	SWI/SNF related, matrix associated, actin dependent regulator of chromatin, subfamily a, member 4	Nucleus	transcription regulator	Common_Between_RNAseq_&_Microarray
G13439	Ldlr	8	22804325..22827199	22875	3.04942	3.73737	3.2317	4.79216	4.60822	5.19289	3.3395	0.356416	4.86442	0.298959	LDLR	low density lipoprotein receptor	Plasma Membrane	transporter	Common_Between_RNAseq_&_Microarray
G1344	Kcnc1	1	103500850..103541476	40627	4.33422	4.39964	4.22673	4.73822	4.568	4.83443	4.3202	0.0873078	4.71355	0.134921	KCNC1	potassium voltage-gated channel, Shaw-related subfamily, member 1	Plasma Membrane	ion channel	Common_Between_RNAseq_&_Microarray
G13444	Rab3d	8	complement(22975024..22984052)	9029	4.94339	4.7517	4.75862	5.39536	5.30844	5.43008	4.8179	0.108729	5.37796	0.0626568	RAB3D	RAB3D, member RAS oncogene family	Cytoplasm	enzyme	Common_Between_RNAseq_&_Microarray
G13445	Tmem205	8	complement(22986957..22992693)	5737	3.27033	3.2386	3.39354	3	3.11922	3	3.30083	0.0818476	3.03974	0.0688309	TMEM205	transmembrane protein 205	Other	other	Common_Between_RNAseq_&_Microarray
G13447	Lppr2	8	23003383..23013242	9860	5.86356	5.73308	5.45826	5.71713	5.59559	5.66846	5.68497	0.206893	5.66039	0.0611669	BC018242	cDNA sequence BC018242	Other	other	Common_Between_RNAseq_&_Microarray
G13448	Swsap1	8	23021536..23024064	2529	3.68395	3.58943	3.46909	3.33322	3.3658	3.24927	3.58082	0.107687	3.31609	0.0601241	SWSAP1	SWIM-type zinc finger 7 associated protein 1	Other	enzyme	Common_Between_RNAseq_&_Microarray
G1345	Sergef	1	complement(103690972..103741937)	50966	4.50819	4.41631	4.30686	4.8015	4.76207	4.91502	4.41046	0.100796	4.8262	0.0794085	SERGEF	secretion regulating guanine nucleotide exchange factor	Nucleus	other	Common_Between_RNAseq_&_Microarray
G13452	Prkcsh	8	23069740..23081287	11548	7.32767	7.22448	7.27283	7.22332	7.19605	7.29582	7.27499	0.0516258	7.2384	0.051566	PRKCSH	protein kinase C substrate 80K-H	Cytoplasm	enzyme	Common_Between_RNAseq_&_Microarray
G13453	Elavl3	8	complement(23085036..23117799)	32764	4.73036	4.78061	4.86166	5.09291	4.78746	5.00157	4.79088	0.0662473	4.96064	0.156781	ELAVL3	ELAV like neuron-specific RNA binding protein 3	Nucleus	other	Common_Between_RNAseq_&_Microarray
G13455	Ecsit	8	complement(23140382..23153830)	13449	5.36243	5.09544	5.35081	5.29453	5.31517	5.38539	5.26956	0.150903	5.3317	0.0476345	ECSIT	ECSIT signalling integrator	Nucleus	transcription regulator	Common_Between_RNAseq_&_Microarray
G13457	Elof1	8	complement(23180772..23185661)	4890	4.95134	5.02284	5.17263	4.86413	5.10846	4.92427	5.04894	0.11293	4.96562	0.127305	ELOF1	elongation factor 1 homolog (S. cerevisiae)	Nucleus	other	Common_Between_RNAseq_&_Microarray
G13459	Pigyl	8	23221470..23222714	1245	3	3	3	3.34033	3.35384	3.71004	3	0	3.46807	0.209659
G13461	ZFP810	8	complement(23330592..23337875)	7284	3.94684	3.98014	3.84864	4.3555	4.0476	3.99558	3.92521	0.0683644	4.13289	0.194527
G13463	RGD1561444	8	23468894..23498785	29892	4.28556	4.1964	4.49931	3.66185	3.83048	3.64583	4.32709	0.155669	3.71272	0.102295	KIAA0895	KIAA0895	Other	other	RNAseq_Specific
G13464	Rp9	8	complement(23502288..23522452)	20165	4.25947	4.03618	4.48042	3.94215	4.07102	3.89007	4.25869	0.222121	3.96775	0.0931509	RP9	retinitis pigmentosa 9 (autosomal dominant)	Nucleus	other	Common_Between_RNAseq_&_Microarray
G13465	Bbs9	8	23813100..24113782	300683	3.68898	3.75771	3.51703	3.2363	3.31885	3.2576	3.65458	0.123973	3.27092	0.0428595	BBS9	Bardet-Biedl syndrome 9	Extracellular Space	other	Common_Between_RNAseq_&_Microarray
G13472	Dpy19l1	8	complement(25615337..25700570)	85234	3.629	3.76891	3.42546	4.22327	4.01133	4.139	3.60779	0.172701	4.12453	0.106706	DPY19L1	dpy-19-like 1 (C. elegans)	Other	other	Common_Between_RNAseq_&_Microarray
G13475	Herpud2	8	complement(26290107..26335056)	44950	4.19954	4.18889	4.26547	4.40307	4.49134	4.46608	4.21797	0.0414815	4.4535	0.0454616	HERPUD2	HERPUD family member 2	Other	other	Common_Between_RNAseq_&_Microarray
G13478	Sept7	8	26435007..26498715	63709	7.09073	7.23918	7.22332	7.41009	7.34279	7.29367	7.18441	0.0815179	7.34885	0.0584469	SEPT7	septin 7	Cytoplasm	other	Common_Between_RNAseq_&_Microarray
G13479	Eepd1	8	26673119..26779323	106205	3	3	3.01683	3	3	3	3.00561	0.00971705	3	0	EEPD1	endonuclease/exonuclease/phosphatase family domain containing 1	Other	other	RNAseq_Specific
G13481	B3gat1	8	27797386..27823230	25845	6.20545	6.17502	6.41548	6.36745	6.04592	6.22217	6.26532	0.130932	6.21185	0.161012	B3GAT1	beta-1,3-glucuronyltransferase 1 (glucuronosyltransferase P)	Cytoplasm	enzyme	RNAseq_Specific
G13487	Acad8	8	complement(28038469..28064606)	26138	5.80154	5.713	5.80568	5.10636	5.38849	5.01591	5.77341	0.0523522	5.17025	0.194334	ACAD8	acyl-CoA dehydrogenase family, member 8	Cytoplasm	enzyme	Common_Between_RNAseq_&_Microarray
G13488	Thyn1	8	28064823..28073704	8882	5.91013	5.95152	6.00349	5.47473	5.65478	5.49824	5.95505	0.0467777	5.54258	0.097871	THYN1	thymocyte nuclear protein 1	Nucleus	other	Common_Between_RNAseq_&_Microarray
G13489	Vps26b	8	complement(28074137..28095244)	21108	4.98162	5.02948	4.91167	5.01236	4.99635	4.91882	4.97426	0.0592502	4.97584	0.0500258	VPS26B	vacuolar protein sorting 26 homolog B (S. pombe)	Cytoplasm	transporter	Common_Between_RNAseq_&_Microarray
G1349	Gtf2h1	1	103923952..103951992	28041	4.23365	4.17097	4.14799	4.34561	4.39001	4.2863	4.1842	0.044335	4.34064	0.0520315	GTF2H1	general transcription factor IIH, polypeptide 1, 62kDa	Nucleus	transcription regulator	Common_Between_RNAseq_&_Microarray
G13491	Jam3	8	complement(28166276..28227631)	61356	4.10962	4.0589	4.16738	3.88519	3.96588	3.99693	4.11197	0.0542777	3.94933	0.0576759	JAM3	junctional adhesion molecule 3	Plasma Membrane	other	Common_Between_RNAseq_&_Microarray
G13495	Ntm	8	complement(30074875..30510958)	436084	5.47278	5.34102	5.37396	5.71094	5.51963	5.4594	5.39592	0.0685716	5.56333	0.131339	NTM	neurotrimin	Plasma Membrane	other	Common_Between_RNAseq_&_Microarray
G13496	Snx19	8	31526777..31563215	36439	4.22289	4.26847	3.84011	4.12667	4.08852	4.0589	4.11049	0.235259	4.09136	0.0339755	SNX19	sorting nexin 19	Cytoplasm	transporter	RNAseq_Specific
G1350	Ldha	1	103975207..103984632	9426	8.86583	8.69646	8.70064	8.90303	8.70064	8.83127	8.75431	0.0965992	8.81165	0.102608	LDHA	lactate dehydrogenase A	Cytoplasm	enzyme	Common_Between_RNAseq_&_Microarray
G13501	Aplp2	8	complement(32323517..32353901)	30385	7.74824	7.77422	7.74017	7.90562	7.82009	7.68533	7.75421	0.0177902	7.80368	0.111058	Aplp2	amyloid beta (A4) precursor-like protein 2	Nucleus	other	Common_Between_RNAseq_&_Microarray
G13505	Nfrkb	8	32555212..32586755	31544	3.93554	3.74972	3.92657	3.74655	3.67431	3.5846	3.87061	0.104788	3.66849	0.0811323	NFRKB	nuclear factor related to kappaB binding protein	Nucleus	transcription regulator	Common_Between_RNAseq_&_Microarray
G13511	ENSRNOG00000009373	8	33096207..33097816	1610	4.64646	4.4749	4.43044	4.55431	4.568	4.75968	4.51726	0.114076	4.62733	0.114825
G13515	Kcnj5	8	complement(33325087..33510036)	184950	6.27184	6.39077	6.33557	6.25833	6.24269	6.29572	6.33272	0.0595157	6.26558	0.0272493	KCNJ5	potassium inwardly-rectifying channel, subfamily J, member 5	Plasma Membrane	ion channel	RNAseq_Specific
G13518	Fli1	8	complement(33587488..33703195)	115708	3	3.04854	3.00075	3.32892	3.14309	3.32245	3.01643	0.0278086	3.26482	0.105473	FLI1	Fli-1 proto-oncogene, ETS transcription factor	Nucleus	transcription regulator	Common_Between_RNAseq_&_Microarray
G13519	Ets1	8	33858338..33921593	63256	3.43284	3.75878	3.35315	4.11379	3.86904	4.04366	3.51492	0.214912	4.00883	0.126038	ETS1	v-ets avian erythroblastosis virus E26 oncogene homolog 1	Nucleus	transcription regulator	Common_Between_RNAseq_&_Microarray
G1352	Tsg101	1	complement(104015888..104044600)	28713	6.08342	6.03463	6.24668	6.18448	6.22275	6.24317	6.12158	0.111056	6.2168	0.0297936	TSG101	tumor susceptibility 101	Cytoplasm	transcription regulator	Common_Between_RNAseq_&_Microarray
G13523	Kirrel3	8	36148052..36273790	125739	3.98014	3.5314	3.60432	3.14554	3.5846	3.17696	3.70529	0.240806	3.30237	0.244923	KIRREL3	kin of IRRE like 3 (Drosophila)	Extracellular Space	other	RNAseq_Specific
G13524	St3gal4	8	complement(36283787..36333597)	49811	3.90361	3.70783	3.90697	3.67715	3.75346	3.7593	3.83947	0.114013	3.72997	0.0458363	ST3GAL4	ST3 beta-galactoside alpha-2,3-sialyltransferase 4	Cytoplasm	enzyme	RNAseq_Specific
G13525	Dcps	8	complement(36340779..36393331)	52553	4.21438	4.21321	4.247	3.8008	3.92515	4.00952	4.22486	0.0191818	3.91183	0.104997	DCPS	decapping enzyme, scavenger	Nucleus	enzyme	RNAseq_Specific
G13526	Tirap	8	complement(36396804..36406884)	10081	3.09915	3.06934	3.26135	3	3.18408	3.11172	3.14328	0.103333	3.0986	0.0927401	TIRAP	toll-interleukin 1 receptor (TIR) domain containing adaptor protein	Cytoplasm	other	RNAseq_Specific
G13527	FOXRED1	8	complement(36421216..36428627)	7412	3.5126	3.3658	3.66865	3.37139	3.4147	3.19283	3.51568	0.15145	3.3263	0.117605	FOXRED1	FAD-dependent oxidoreductase domain containing 1	Cytoplasm	other	RNAseq_Specific
G13528	Srpr	8	36428866..36434332	5467	6.91469	6.93213	6.77755	6.91846	6.97115	6.85379	6.87479	0.0846602	6.91447	0.0587836	SRPR	signal recognition particle receptor (docking protein)	Cytoplasm	other	Common_Between_RNAseq_&_Microarray
G13529	Fam118b	8	complement(36435180..36456913)	21734	3.84664	3.8988	3.97462	4.02603	3.95941	3.91847	3.90669	0.0643546	3.96797	0.054293	FAM118B	family with sequence similarity 118, member B	Other	other	Common_Between_RNAseq_&_Microarray
G13531	Rpusd4	8	36485875..36495292	9418	3.69122	3.75984	3.77419	3.44876	3.65273	3.66865	3.74175	0.0443451	3.59005	0.122614	RPUSD4	RNA pseudouridylate synthase domain containing 4	Cytoplasm	other	RNAseq_Specific
G13534	Ddx25	8	complement(36761173..36777206)	16034	5.35822	5.35382	5.35134	5.02062	5.2505	5.23659	5.35446	0.0034851	5.16924	0.128895	DDX25	DEAD (Asp-Glu-Ala-Asp) box helicase 25	Nucleus	enzyme	Common_Between_RNAseq_&_Microarray
G13535	Hyls1	8	complement(36779967..36780908)	942	3	3.19675	3.1999	3.21235	3	3	3.13222	0.114514	3.07078	0.122603	HYLS1	hydrolethalus syndrome 1	Nucleus	other	RNAseq_Specific
G13536	Pus3	8	36783458..36785648	2191	3.40039	3.42076	3.44282	3.41942	3.86264	3.65329	3.42132	0.021217	3.64511	0.221726	PUS3	pseudouridylate synthase 3	Nucleus	enzyme	RNAseq_Specific
G13559	Chek1	8	complement(39184021..39204447)	20427	3	3	3.3949	3	3	3	3.13163	0.227993	3	0	CHEK1	checkpoint kinase 1	Nucleus	kinase	RNAseq_Specific
G13561	Stt3a	8	complement(39207076..39246422)	39347	4.53488	4.48138	4.53018	4.80019	4.74765	4.58588	4.51548	0.0296248	4.71124	0.111701	STT3A	STT3A, subunit of the oligosaccharyltransferase complex (catalytic)	Plasma Membrane	enzyme	RNAseq_Specific
G13562	Ei24	8	complement(39257606..39269673)	12068	5.93793	6.04056	5.94556	5.71836	5.77083	5.69669	5.97469	0.0571793	5.72862	0.0381208	EI24	etoposide induced 2.4	Other	other	Common_Between_RNAseq_&_Microarray
G13563	Fez1	8	39307654..39353312	45659	6.99879	7.03697	7.03511	6.77637	6.91284	6.7486	7.02363	0.0215253	6.8126	0.0879158	FEZ1	fasciculation and elongation protein zeta 1 (zygin I)	Cytoplasm	other	Common_Between_RNAseq_&_Microarray
G13564	Pknox2	8	complement(39366205..39463886)	97682	3	3	3	3.02042	3	3	3	0	3.00681	0.0117894	Pknox2	PBX/knotted 1 homeobox 2	Other	other	RNAseq_Specific
G13566	Tmem218	8	39687930..39703272	15343	3.88812	3.83504	3.85966	3.35666	3.67147	3.39217	3.86094	0.0265605	3.47343	0.172423	TMEM218	transmembrane protein 218	Extracellular Space	other	RNAseq_Specific
G1357	PTPN5	1	complement(104263143..104320930)	57788	5.42353	5.42873	5.62542	5.77254	5.75502	5.95152	5.49256	0.115087	5.82636	0.108744	PTPN5	protein tyrosine phosphatase, non-receptor type 5 (striatum-enriched)	Other	phosphatase	Common_Between_RNAseq_&_Microarray
G13572	Msantd2	8	39961366..39994454	33089	5.52105	5.37673	5.83403	5.07133	5.11929	4.89554	5.57727	0.233777	5.02872	0.117802	Msantd2	Myb/SANT-like DNA-binding domain containing 2	Other	other	Common_Between_RNAseq_&_Microarray
G13573	Esam	8	39998699..40009620	10922	4.75862	4.77955	4.73173	4.94877	4.96783	5.13147	4.75663	0.0239715	5.01602	0.100433	ESAM	endothelial cell adhesion molecule	Plasma Membrane	other	Common_Between_RNAseq_&_Microarray
G13576	Spa17	8	complement(40067946..40077019)	9074	4.92901	4.84021	5.07605	4.84347	5.25371	5.06161	4.94842	0.119116	5.05293	0.205255	SPA17	sperm autoantigenic protein 17	Plasma Membrane	other	Common_Between_RNAseq_&_Microarray
G13577	Siae	8	40079093..40114338	35246	3.88862	3.85519	3.71114	3.57012	3.61729	3.49993	3.81832	0.0943095	3.56244	0.0590556	SIAE	sialic acid acetylesterase	Cytoplasm	enzyme	Common_Between_RNAseq_&_Microarray
G13579	Tbrg1	8	complement(40115616..40123274)	7659	5.10154	4.98344	5.1327	5.21945	5.3339	5.37257	5.07256	0.0787357	5.30864	0.0796248	TBRG1	transforming growth factor beta regulator 1	Nucleus	other	Common_Between_RNAseq_&_Microarray
G13587	Olr1214	8	40341164..40702400	361237	3.49356	3.62141	3.69345	3.99377	4.17775	4.24624	3.60281	0.101236	4.13925	0.130563	Olfr890	olfactory receptor 890	Plasma Membrane	G-protein coupled receptor	RNAseq_Specific
G136	Arg1	1	23005317..23017705	12389	4.43044	4.16897	4.25457	4.45988	4.60524	4.36111	4.28466	0.133303	4.47541	0.122806	ARG1	arginase 1	Cytoplasm	enzyme	Common_Between_RNAseq_&_Microarray
G13663	AW551984	8	complement(43303075..43322826)	19752	5.82718	5.87897	6.21665	5.25352	4.01849	5.07348	5.97427	0.211501	4.78183	0.66717
G13671	ENSRNOG00000034066	8	43478238..43480374	2137	9.28282	9.13254	9.7888	9.44883	9.92527	9.91771	9.40138	0.343821	9.76394	0.272919
G13679	RGD1565368	8	44037003..44038233	1231	5.63445	5.33141	5.24726	5.09944	5.02062	5.76248	5.40437	0.203645	5.29418	0.407469	GAPDH	glyceraldehyde-3-phosphate dehydrogenase	Cytoplasm	enzyme	Common_Between_RNAseq_&_Microarray
G13683	ENSRNOG00000039200	8	44271901..44281224	9324	6.1471	6.42844	6.51349	5.44359	5.14965	4.86438	6.36301	0.191757	5.15254	0.289614
G13686	Sc5d	8	complement(45001503..45010434)	8932	4.33778	4.4143	4.19285	4.89578	4.97382	5.12734	4.31497	0.112471	4.99898	0.117815	SC5D	sterol-C5-desaturase	Cytoplasm	enzyme	Common_Between_RNAseq_&_Microarray
G13688	Tbcel	8	complement(45168898..45224997)	56100	4.83165	4.94807	5.00475	4.83468	4.9889	4.98162	4.92816	0.0882475	4.93507	0.0870108	TBCEL	tubulin folding cofactor E-like	Other	other	RNAseq_Specific
G13689	Grik4	8	complement(45279686..45568161)	288476	3.14145	3	3.04768	3	3.05553	3	3.06304	0.0719664	3.01851	0.032058	GRIK4	glutamate receptor, ionotropic, kainate 4	Plasma Membrane	ion channel	RNAseq_Specific
G13690	Arhgef12	8	complement(45745243..45863838)	118596	3.64295	3.5984	3.49419	3.49163	3.40039	3.27183	3.57852	0.076351	3.38795	0.110427	ARHGEF12	Rho guanine nucleotide exchange factor (GEF) 12	Cytoplasm	other	RNAseq_Specific
G13691	Tmem136	8	complement(45867546..45874816)	7271	3.56587	3.54258	3.59959	3.66013	3.73193	3.64062	3.56935	0.0286637	3.67756	0.0480845	TMEM136	transmembrane protein 136	Other	other	RNAseq_Specific
G13693	Oaf	8	complement(45980602..45998572)	17971	3.42346	3.42076	3.24849	3.15043	3.22862	3.30284	3.36424	0.100245	3.2273	0.0762127	OAF	OAF homolog (Drosophila)	Other	other	Common_Between_RNAseq_&_Microarray
G13694	ENSRNOG00000049809	8	complement(46004615..46006251)	1637	9.33536	9.4804	9.25645	9.70864	9.70864	9.77018	9.35741	0.113591	9.72916	0.0355312
G13695	Clmp	8	complement(46020808..46148061)	127254	3	3	3	3	3.06503	3.05291	3	0	3.03931	0.0345791	CLMP	CXADR-like membrane protein	Plasma Membrane	other	Common_Between_RNAseq_&_Microarray
G13699	Thy1	8	46998623..47003437	4815	8.58287	8.17073	8.55409	8.94342	9.10743	9.27425	8.4359	0.230091	9.10837	0.165418	THY1	Thy-1 cell surface antigen	Plasma Membrane	other	Common_Between_RNAseq_&_Microarray
G137	Med23	1	complement(23019613..23067284)	47672	4.11587	4.05543	4.08212	3.86559	3.96311	3.936	4.08447	0.0302875	3.92157	0.0503361	MED23	mediator complex subunit 23	Nucleus	transcription regulator	Common_Between_RNAseq_&_Microarray
G13702	C1qtnf5	8	47059596..47061466	1871	3.21391	3.1936	3.13406	3	3	3	3.18053	0.0414991	3	0	C1QTNF5	C1q and tumor necrosis factor related protein 5	Plasma Membrane	transmembrane receptor	Common_Between_RNAseq_&_Microarray
G13703	Rnf26	8	complement(47063866..47065140)	1275	4.04103	4.1349	3.75291	4.07144	3.87493	4.0216	3.97628	0.199053	3.98932	0.102151	RNF26	ring finger protein 26	Other	other	Common_Between_RNAseq_&_Microarray
G13704	Mcam	8	47091209..47099626	8418	4.34063	4.41698	4.15974	4.64213	4.39447	4.84247	4.30578	0.132114	4.62635	0.224417	MCAM	melanoma cell adhesion molecule	Plasma Membrane	other	Common_Between_RNAseq_&_Microarray
G13709	Abcg4	8	complement(47222818..47238385)	15568	3.74277	3.76996	3.8039	3.70289	3.76304	3.72102	3.77221	0.0306301	3.72898	0.0308527	ABCG4	ATP-binding cassette, sub-family G (WHITE), member 4	Plasma Membrane	transporter	Common_Between_RNAseq_&_Microarray
G1371	Zdhhc13	1	105165499..105204298	38800	4.01895	4.19285	4.19285	4.58887	4.58227	4.53862	4.13488	0.100401	4.56992	0.0273051	ZDHHC13	zinc finger, DHHC-type containing 13	Nucleus	transcription regulator	Common_Between_RNAseq_&_Microarray
G13710	Hinfp	8	complement(47246470..47252624)	6155	3.49228	3.29551	3.41807	3.16736	3.1308	3.10587	3.40195	0.0993704	3.13467	0.0309243	HINFP	histone H4 transcription factor	Nucleus	transcription regulator	RNAseq_Specific
G13711	C2cd2l	8	complement(47259704..47269967)	10264	5.53792	5.49361	5.25711	5.64472	5.40049	5.52387	5.42955	0.150964	5.52303	0.122119	C2CD2L	C2CD2-like	Other	other	Common_Between_RNAseq_&_Microarray
G13712	Dpagt1	8	47277020..47283503	6484	5.07627	5.18182	5.24498	5.3981	5.54334	5.54102	5.16769	0.0852384	5.49415	0.0831923	DPAGT1	dolichyl-phosphate (UDP-N-acetylglucosamine) N-acetylglucosaminephosphotransferase 1 (GlcNAc-1-P transferase)	Cytoplasm	enzyme	Common_Between_RNAseq_&_Microarray
G13713	H2afx	8	47284623..47285952	1330	3.98879	4.0176	4.06236	3.49675	3.60078	3.55734	4.02292	0.0370716	3.55162	0.0522534	H2AFX	H2A histone family, member X	Nucleus	transcription regulator	Common_Between_RNAseq_&_Microarray
G13714	Hmbs	8	complement(47286249..47293618)	7370	4.02649	4.02558	4.13162	4.04409	4.17297	4.14473	4.06123	0.0609612	4.12059	0.0677441	HMBS	hydroxymethylbilane synthase	Cytoplasm	enzyme	Common_Between_RNAseq_&_Microarray
G13715	Vps11	8	complement(47296463..47311266)	14804	5.4396	5.37517	5.38677	5.33497	5.23908	5.37725	5.40051	0.0343424	5.3171	0.0708	VPS11	vacuolar protein sorting 11 homolog (S. cerevisiae)	Cytoplasm	transporter	Common_Between_RNAseq_&_Microarray
G13716	Hyou1	8	47318957..47330880	11924	7.6058	7.60885	7.50235	7.37809	7.29367	7.12876	7.57234	0.060625	7.26684	0.12681	HYOU1	hypoxia up-regulated 1	Cytoplasm	other	Common_Between_RNAseq_&_Microarray
G13717	Slc37a4	8	47335910..47341992	6083	4.2572	4.23557	4.17497	3.71827	3.7847	3.87984	4.22258	0.0426276	3.79427	0.0812099	SLC37A4	solute carrier family 37 (glucose-6-phosphate transporter), member 4	Cytoplasm	transporter	Common_Between_RNAseq_&_Microarray
G13718	Trappc4	8	complement(47342732..47345957)	3226	5.04683	5.3323	5.30716	5.16462	5.38436	5.26875	5.22876	0.158061	5.27258	0.109917	TRAPPC4	trafficking protein particle complex 4	Cytoplasm	other	Common_Between_RNAseq_&_Microarray
G13719	Rps25	8	47346312..47348692	2381	8.53309	8.63133	8.81446	8.52628	8.42783	8.72383	8.65963	0.142803	8.55932	0.150741	RPS25	ribosomal protein S25	Cytoplasm	other	Common_Between_RNAseq_&_Microarray
G13720	Ccdc84	8	complement(47348806..47355477)	6672	4.25608	3.99693	4.28482	3.80954	3.8325	3.74545	4.17927	0.158571	3.79583	0.0451171	CCDC84	coiled-coil domain containing 84	Other	other	Common_Between_RNAseq_&_Microarray
G13727	Ddx6	8	47543903..47576345	32443	3.78781	3.94451	3.51577	4.09616	3.89057	3.90697	3.74936	0.216938	3.96456	0.11426	DDX6	DEAD (Asp-Glu-Ala-Asp) box helicase 6	Nucleus	enzyme	Common_Between_RNAseq_&_Microarray
G13729	Phldb1	8	complement(47615943..47656917)	40975	3.76785	3.77208	3.72595	3.54134	3.38456	3.52207	3.75529	0.0254971	3.48266	0.0854993	PHLDB1	pleckstrin homology-like domain, family B, member 1	Cytoplasm	other	Common_Between_RNAseq_&_Microarray
G13730	Arcn1	8	complement(47670185..47694935)	24751	6.06468	6.12639	5.9507	6.32912	6.28956	6.24745	6.04726	0.0891327	6.28871	0.0408446	ARCN1	archain 1	Cytoplasm	other	Common_Between_RNAseq_&_Microarray
G13731	Ift46	8	47699718..47716194	16477	5.30497	5.20975	5.28659	4.70021	4.74361	4.6713	5.2671	0.0505086	4.70504	0.0363965	IFT46	intraflagellar transport 46 homolog (Chlamydomonas)	Cytoplasm	other	Common_Between_RNAseq_&_Microarray
G13732	Tmem25	8	complement(47719267..47724685)	5419	3.29404	3.11756	3.18964	3	3	3	3.20041	0.0887312	3	0	TMEM25	transmembrane protein 25	Extracellular Space	other	RNAseq_Specific
G13735	Atp5l	8	complement(47838601..47845456)	6856	8.01574	7.95319	8.09263	8.02006	8.10133	8.08306	8.02052	0.0698434	8.06815	0.0426378	ATP5L	ATP synthase, H+ transporting, mitochondrial Fo complex, subunit G	Cytoplasm	transporter	Common_Between_RNAseq_&_Microarray
G13736	Ube4a	8	complement(47847869..47887561)	39693	4.29038	4.34098	4.37966	4.93611	4.95671	4.93705	4.33701	0.0447719	4.94329	0.0116315	UBE4A	ubiquitination factor E4A	Cytoplasm	enzyme	Common_Between_RNAseq_&_Microarray
G13744	Scn2b	8	48045393..48053999	8607	4.69633	4.95039	4.1349	5.23621	5.0255	4.91763	4.59387	0.417289	5.05978	0.162031	SCN2B	sodium channel, voltage-gated, type II, beta subunit	Plasma Membrane	ion channel	RNAseq_Specific
G13750	Fxyd6	8	48323326..48326136	2811	6.76553	6.903	6.70148	5.06031	5.35434	5.17123	6.79	0.102965	5.1953	0.148485	FXYD6	FXYD domain containing ion transport regulator 6	Plasma Membrane	ion channel	Common_Between_RNAseq_&_Microarray
G13754	Bace1	8	48766005..48788272	22268	5.51412	5.62498	5.42067	5.3696	5.38401	5.23755	5.51992	0.102278	5.33039	0.0807217	BACE1	beta-site APP-cleaving enzyme 1	Cytoplasm	peptidase	RNAseq_Specific
G13755	Rnf214	8	complement(48792588..48822370)	29783	4.05718	4.04321	3.80441	4.17576	4.04321	3.98243	3.96827	0.142078	4.06713	0.0988575
G13756	Pcsk7	8	48824388..48847099	22712	3.74008	3.47106	3.7593	3.78314	3.7657	3.87198	3.65681	0.161157	3.80694	0.0569976	PCSK7	proprotein convertase subtilisin/kexin type 7	Cytoplasm	peptidase	Common_Between_RNAseq_&_Microarray
G13757	Tagln	8	complement(48847018..48852863)	5846	4.50725	3.97141	3.68225	3.67715	3.55734	4.05066	4.05364	0.418598	3.76172	0.257302	TAGLN	transgelin	Cytoplasm	other	Common_Between_RNAseq_&_Microarray
G13758	Sidt2	8	complement(48854808..48871125)	16318	4.38691	4.14391	4.2852	4.11546	4.08382	4.13367	4.27201	0.122035	4.11098	0.0252228	SIDT2	SID1 transmembrane family, member 2	Cytoplasm	other	Common_Between_RNAseq_&_Microarray
G13759	Pafah1b2	8	complement(48884455..48902445)	17991	6.87435	6.89588	6.72342	7.22014	7.07	6.99879	6.83122	0.0939717	7.09631	0.112993	PAFAH1B2	platelet-activating factor acetylhydrolase 1b, catalytic subunit 2 (30kDa)	Cytoplasm	enzyme	Common_Between_RNAseq_&_Microarray
G13761	Sik3	8	48934911..49144449	209539	5.17442	5.27174	5.07047	5.38246	5.23793	5.41358	5.17221	0.100651	5.34466	0.0937272	Sik3	SIK family kinase 3	Cytoplasm	kinase	Common_Between_RNAseq_&_Microarray
G13766	Zfp259	8	49189009..49198583	9575	3.81368	3.8567	3.87198	4.06885	4.04804	4.01671	3.84745	0.0302322	4.04453	0.0262435	ZNF259	zinc finger protein 259	Nucleus	other	Common_Between_RNAseq_&_Microarray
G13767	Bud13	8	49198988..49214820	15833	3.24698	3.3203	3.31667	3	3.12254	3.05553	3.29465	0.0413262	3.05935	0.0613575	BUD13	BUD13 homolog (S. cerevisiae)	Nucleus	other	RNAseq_Specific
G1377	Htatip2	1	106145091..106159700	14610	3.48266	3.16817	3.34746	4.31807	4.19797	4.49134	3.33277	0.15776	4.33579	0.147486	HTATIP2	HIV-1 Tat interactive protein 2, 30kDa	Nucleus	transcription regulator	Common_Between_RNAseq_&_Microarray
G13771	Cadm1	8	50460915..50788814	327900	6.53962	6.57448	6.46147	6.33083	6.03463	5.93864	6.52519	0.057869	6.10137	0.204433	CADM1	cell adhesion molecule 1	Plasma Membrane	other	Common_Between_RNAseq_&_Microarray
G13772	RGD1566243	8	51323449..51357486	34038	3.03982	3	3.23016	3.13161	3.21702	3.18645	3.08999	0.12301	3.17836	0.0432761	RGD1566243	similar to protein of unknown function	Other	other	RNAseq_Specific
G13773	Rexo2	8	complement(51395457..51407172)	11716	6.49369	6.48478	6.53752	6.44278	6.67143	6.58511	6.50533	0.0282358	6.56644	0.115466	REXO2	RNA exonuclease 2	Cytoplasm	enzyme	Common_Between_RNAseq_&_Microarray
G13774	Rbm7	8	complement(51415941..51421071)	5131	4.08297	4.36744	4.297	4.18175	4.30757	4.04278	4.24914	0.148152	4.17737	0.132449	RBM7	RNA binding motif protein 7	Other	other	Common_Between_RNAseq_&_Microarray
G13778	Htr3a	8	complement(51803897..51816207)	12311	3.83048	4.01358	3.72595	3.83048	3.83149	4.21476	3.85667	0.145592	3.95891	0.221575	HTR3A	5-hydroxytryptamine (serotonin) receptor 3A, ionotropic	Plasma Membrane	ion channel	RNAseq_Specific
G1378	Prmt3	1	106163844..106250508	86665	3.69902	3.80954	3.65329	3.83556	3.85818	3.9865	3.72062	0.0803342	3.89342	0.0814067	PRMT3	protein arginine methyltransferase 3	Nucleus	enzyme	RNAseq_Specific
G13780	Usp28	8	51909370..51969623	60254	3.64121	3.48779	3.67318	3.28741	3.38179	3.33249	3.60073	0.0991025	3.3339	0.0472061	USP28	ubiquitin specific peptidase 28	Nucleus	peptidase	RNAseq_Specific
G13781	Zw10	8	51980064..52005883	25820	3.37832	3.29404	3.30867	3.79559	3.704	3.77156	3.32701	0.0450339	3.75705	0.0474899	ZW10	zw10 kinetochore protein	Nucleus	other	Common_Between_RNAseq_&_Microarray
G13786	Ncam1	8	complement(52458775..52522326)	63552	6.36387	6.41894	6.01268	6.03133	5.75556	5.73308	6.26516	0.220387	5.83999	0.166086	NCAM1	neural cell adhesion molecule 1	Plasma Membrane	other	Common_Between_RNAseq_&_Microarray
G13790	Pts	8	complement(53551584..53558594)	7011	3.46518	3.57438	3.5798	3.76304	3.69791	3.83709	3.53979	0.0646689	3.76601	0.0696387	PTS	6-pyruvoyltetrahydropterin synthase	Cytoplasm	enzyme	Common_Between_RNAseq_&_Microarray
G13794	Sdhd	8	complement(53625447..53634926)	9480	6.40028	6.38275	6.20672	6.09487	6.09096	6.1206	6.32991	0.107049	6.10214	0.0161044	SDHD	succinate dehydrogenase complex, subunit D, integral membrane protein	Cytoplasm	enzyme	Common_Between_RNAseq_&_Microarray
G13795	Timm8b	8	53635064..53636450	1387	6.77525	6.91469	7.04506	6.85472	6.9048	6.92817	6.91166	0.134929	6.8959	0.0375226	TIMM8B	translocase of inner mitochondrial membrane 8 homolog B (yeast)	Cytoplasm	transporter	Common_Between_RNAseq_&_Microarray
G13796	ENSRNOG00000009958	8	complement(53637061..53647516)	10456	3.45404	3.52703	3.34677	3.66413	3.56952	3.45667	3.44261	0.0906748	3.56344	0.103863	C11orf57	chromosome 11 open reading frame 57	Other	other	Common_Between_RNAseq_&_Microarray
G13797	Pih1d2	8	53647606..53655845	8240	3.02926	3	3.04768	3	3	3	3.02565	0.0240444	3	0	PIH1D2	PIH1 domain containing 2	Other	other	RNAseq_Specific
G13798	Dlat	8	complement(53659922..53685238)	25317	5.27786	5.32872	5.10091	5.52057	5.40083	5.30442	5.23583	0.119579	5.40861	0.108286	DLAT	dihydrolipoamide S-acetyltransferase	Cytoplasm	enzyme	RNAseq_Specific
G13799	Dixdc1	8	complement(53688641..53740876)	52236	3.53889	3.5518	3.53577	3.17696	3.2636	3.33678	3.54215	0.00850113	3.25911	0.080005	DIXDC1	DIX domain containing 1	Cytoplasm	other	Common_Between_RNAseq_&_Microarray
G1380	Nell1	1	106540585..107260907	720323	6.57577	6.27482	6.35711	5.74187	5.63401	5.6659	6.40256	0.155537	5.68059	0.0554098	NELL1	NEL-like 1 (chicken)	Extracellular Space	growth factor	Common_Between_RNAseq_&_Microarray
G13805	Alg9	8	53799792..53862451	62660	3.93791	3.73301	3.84161	3.92749	3.96404	3.94451	3.83751	0.102511	3.94535	0.018286	ALG9	ALG9, alpha-1,2-mannosyltransferase	Cytoplasm	enzyme	Common_Between_RNAseq_&_Microarray
G13808	Sik2	8	complement(53905730..54005174)	99445	3	3	3	3.06503	3.05553	3.00521	3	0	3.04192	0.0321447	Sik2	salt-inducible kinase 2	Other	other	Common_Between_RNAseq_&_Microarray
G13817	Arhgap20	8	54764682..54845836	81155	3	3	3	3.25001	3	3.31522	3	0	3.18841	0.166395	ARHGAP20	Rho GTPase activating protein 20	Cytoplasm	other	RNAseq_Specific
G13818	Fdx1	8	complement(54958315..54977222)	18908	3.97554	3.94121	3.82494	3.44282	3.49675	3.39354	3.9139	0.0789259	3.44437	0.0516192	FDX1	ferredoxin 1	Cytoplasm	transporter	Common_Between_RNAseq_&_Microarray
G13819	Mrpl1	8	54994572..55084743	90172	4.27631	4.02558	4.18533	4.44904	4.57744	4.57955	4.16241	0.126927	4.53534	0.0747469	MRPL1	mitochondrial ribosomal protein L1	Cytoplasm	other	Common_Between_RNAseq_&_Microarray
G13820	Rdx	8	55167300..55194096	26797	4.54818	4.71482	4.65649	4.84746	4.80123	4.67701	4.63983	0.0845611	4.77523	0.0881497	RDX	radixin	Cytoplasm	other	Common_Between_RNAseq_&_Microarray
G13825	AI593442	8	complement(55822041..55828684)	6644	3.03015	3.38109	3.30284	3.96173	3.97049	4.247	3.23803	0.184227	4.05974	0.162229
G13826	Ddx10	8	complement(56244977..56407666)	162690	3.59182	3.68674	3.629	3.86707	3.89251	3.8813	3.63586	0.0478304	3.88029	0.0127518	DDX10	DEAD (Asp-Glu-Ala-Asp) box polypeptide 10	Nucleus	enzyme	Common_Between_RNAseq_&_Microarray
G13828	Kdelc2	8	56547250..56564862	17613	4.19444	4.33099	4.12002	4.11003	4.12085	3.98105	4.21515	0.106997	4.07065	0.0777795	KDELC2	KDEL (Lys-Asp-Glu-Leu) containing 2	Other	other	RNAseq_Specific
G13831	Npat	8	56703321..56740923	37603	3.72978	3.59063	3.74169	3.53765	3.56465	3.50502	3.68736	0.0839894	3.53577	0.0298602	NPAT	nuclear protein, ataxia-telangiectasia locus	Nucleus	transcription regulator	RNAseq_Specific
G13832	Acat1	8	complement(56750515..56778323)	27809	6.41979	6.43763	6.54249	6.22381	6.24107	6.12928	6.46663	0.0662955	6.19805	0.0601796	ACAT1	acetyl-CoA acetyltransferase 1	Cytoplasm	enzyme	Common_Between_RNAseq_&_Microarray
G13833	Cul5	8	complement(56785487..56835567)	50081	3.46256	3.43883	3.54258	3.66752	3.6366	3.58401	3.48133	0.0543622	3.62937	0.0422198	CUL5	cullin 5	Nucleus	ion channel	RNAseq_Specific
G13834	Rab39a	8	complement(56857848..56874859)	17012	3.24243	3.48779	3.2386	3.69457	3.47687	3.55854	3.32294	0.142777	3.57666	0.109973	RAB39A	RAB39A, member RAS oncogene family	Cytoplasm	enzyme	RNAseq_Specific
G13837	Elmod1	8	complement(57066609..57123000)	56392	5.05555	5.40424	5.09902	4.73308	5.04377	4.76445	5.18627	0.190016	4.8471	0.171043	ELMOD1	ELMO/CED-12 domain containing 1	Other	other	Common_Between_RNAseq_&_Microarray
G13840	Gldn	8	57446589..57490037	43449	6.80884	7.10088	7.40369	8.01574	8.14613	7.75	7.10447	0.297445	7.97063	0.201881	GLDN	gliomedin	Cytoplasm	other	RNAseq_Specific
G13841	Dmxl2	8	complement(57509282..57571056)	61775	4.09532	4.17576	3.83911	4.29993	4.08297	4.03573	4.03673	0.175806	4.13954	0.140896	Dmxl2	Dmx-like 2	Cytoplasm	other	Common_Between_RNAseq_&_Microarray
G13845	Cib2	8	complement(57704422..57720624)	16203	4.02294	3.9084	4.03002	3.61846	3.72486	3.71774	3.98712	0.0682674	3.68702	0.0594783	CIB2	calcium and integrin binding family member 2	Other	kinase	RNAseq_Specific
G13846	Idh3a	8	57745463..57764540	19078	6.80999	6.85011	6.77525	6.93006	6.8361	6.8569	6.81178	0.0374638	6.87435	0.0493511	IDH3A	isocitrate dehydrogenase 3 (NAD+) alpha	Cytoplasm	enzyme	Common_Between_RNAseq_&_Microarray
G13847	Acsbg1	8	complement(57764975..57820724)	55750	6.31098	6.15674	6.10129	5.90761	5.97842	5.7211	6.18967	0.108651	5.86904	0.132926	ACSBG1	acyl-CoA synthetase bubblegum family member 1	Cytoplasm	enzyme	Common_Between_RNAseq_&_Microarray
G13848	Dnaja4	8	57859314..57875055	15742	5.76274	5.78881	5.65807	5.65535	5.53232	5.52434	5.73654	0.0691989	5.57067	0.0734429	DNAJA4	DnaJ (Hsp40) homolog, subfamily A, member 4	Nucleus	other	Common_Between_RNAseq_&_Microarray
G13849	Wdr61	8	complement(57877398..57894572)	17175	6.04428	6.04941	6.21344	6.38309	6.44112	6.40079	6.10238	0.0962185	6.40833	0.0297396	WDR61	WD repeat domain 61	Other	other	Common_Between_RNAseq_&_Microarray
G13850	Crabp1	8	57926233..57934271	8039	4.27631	3.79201	4.26246	3	3.5126	3.02042	4.11026	0.275703	3.17767	0.290236	CRABP1	cellular retinoic acid binding protein 1	Cytoplasm	transporter	RNAseq_Specific
G13851	Ireb2	8	58039175..58083277	44103	3.63601	3.78365	3.44744	3.88082	3.68898	3.64524	3.62237	0.168518	3.73835	0.125311	IREB2	iron-responsive element binding protein 2	Cytoplasm	translation regulator	Common_Between_RNAseq_&_Microarray
G13853	Psma4	8	58114599..58122076	7478	6.5008	6.6647	6.76348	6.76712	6.80884	6.74329	6.64299	0.132678	6.77308	0.0331786	PSMA4	proteasome (prosome, macropain) subunit, alpha type, 4	Cytoplasm	peptidase	Common_Between_RNAseq_&_Microarray
G13858	ENSRNOG00000014529	8	58292998..58348188	55191	4.3083	4.48619	4.13326	4.73389	4.5738	4.35514	4.30925	0.176465	4.55427	0.190129	UBE2Q2	ubiquitin-conjugating enzyme E2Q family member 2	Other	enzyme	Common_Between_RNAseq_&_Microarray
G13859	Fbxo22	8	58351331..58367359	16029	5.4594	5.51017	5.39192	5.22795	5.35892	5.17382	5.45383	0.0593218	5.25357	0.0951708	FBXO22	F-box protein 22	Other	enzyme	Common_Between_RNAseq_&_Microarray
G1386	Slc17a6	1	108040511..108080510	40000	5.15837	5.65892	5.65119	6.15512	5.89154	6.28383	5.48949	0.286792	6.11016	0.199971	SLC17A6	solute carrier family 17 (vesicular glutamate transporter), member 6	Plasma Membrane	transporter	Common_Between_RNAseq_&_Microarray
G13860	Nrg4	8	complement(58364273..58430726)	66454	3	3	3.68225	3.08985	3	3.363	3.22742	0.3939	3.15095	0.189054	NRG4	neuregulin 4	Extracellular Space	growth factor	RNAseq_Specific
G13861	RGD1562084	8	58480570..58593993	113424	3.41128	3.10335	3.35102	3.12831	3.28001	3.20147	3.28855	0.163196	3.20326	0.0758634	C15orf27	chromosome 15 open reading frame 27	Other	other	RNAseq_Specific
G13862	Etfa	8	complement(58608433..58665406)	56974	5.68552	5.62205	5.7343	5.43142	5.69014	5.50159	5.68062	0.0562854	5.54105	0.133797	ETFA	electron-transfer-flavoprotein, alpha polypeptide	Cytoplasm	transporter	Common_Between_RNAseq_&_Microarray
G13865	Scaper	8	complement(58788796..59138175)	349380	3.82442	3.73737	3.7593	3.89396	3.82948	3.7352	3.7737	0.0452777	3.81955	0.0798412	SCAPER	S-phase cyclin A-associated protein in the ER	Extracellular Space	other	Common_Between_RNAseq_&_Microarray
G13871	Rcn2	8	59280470..59297530	17061	8.11873	8.29271	8.38219	8.27774	8.11873	8.1973	8.26454	0.133968	8.19792	0.0795037	RCN2	reticulocalbin 2, EF-hand calcium binding domain	Cytoplasm	other	Common_Between_RNAseq_&_Microarray
G13874	Tspan3	8	complement(59377470..59400900)	23431	8.2507	8.32966	8.29801	8.14613	8.13368	8.05804	8.29279	0.0397351	8.11262	0.0476743	TSPAN3	tetraspanin 3	Plasma Membrane	other	Common_Between_RNAseq_&_Microarray
G13876	Hmg20a	8	59650251..59727759	77509	4.64443	4.89163	4.55431	4.4227	4.37235	4.53488	4.69679	0.174649	4.44331	0.0831983	HMG20A	high mobility group 20A	Nucleus	transcription regulator	Common_Between_RNAseq_&_Microarray
G13877	Lingo1	8	complement(59844165..59860388)	16224	4.86413	4.6542	4.36533	4.29664	4.29442	4.56983	4.62789	0.250438	4.38697	0.158372	LINGO1	leucine rich repeat and Ig domain containing 1	Plasma Membrane	other	Common_Between_RNAseq_&_Microarray
G13882	Imp3	8	60176548..60177436	889	4.60465	4.60109	4.97107	4.61176	4.78192	4.73929	4.7256	0.212587	4.71099	0.0885393	IMP3	IMP3, U3 small nucleolar ribonucleoprotein, homolog (yeast)	Cytoplasm	other	Common_Between_RNAseq_&_Microarray
G13883	Snupn	8	60185056..60217869	32814	5.644	5.75208	5.91289	5.74591	5.88984	5.69947	5.76966	0.135304	5.7784	0.0992588	SNUPN	snurportin 1	Nucleus	other	RNAseq_Specific
G13884	Ptpn9	8	60228924..60308849	79926	4.8015	5.14271	4.95975	5.34744	5.23142	5.28881	4.96799	0.170758	5.28922	0.0580099	PTPN9	protein tyrosine phosphatase, non-receptor type 9	Cytoplasm	phosphatase	RNAseq_Specific
G13885	Sin3a	8	60332843..60373239	40397	3.54937	3.57255	3.41672	3.40039	3.33535	3.26807	3.51288	0.0840795	3.33461	0.0661628	SIN3A	SIN3 transcription regulator family member A	Nucleus	transcription regulator	RNAseq_Specific
G13886	Man2c1	8	60375817..60386940	11124	5.35434	5.22698	5.16462	4.56587	4.56983	4.57532	5.24865	0.0966969	4.57034	0.00474264	MAN2C1	mannosidase, alpha, class 2C, member 1	Cytoplasm	enzyme	Common_Between_RNAseq_&_Microarray
G13887	Neil1	8	complement(60387398..60393242)	5845	3.25381	3.2077	3.29698	3.10502	3.12831	3.25834	3.25283	0.0446445	3.16389	0.0826206	NEIL1	nei endonuclease VIII-like 1 (E. coli)	Nucleus	enzyme	RNAseq_Specific
G13888	Commd4	8	complement(60403480..60406936)	3457	5.69056	5.61971	5.87504	5.16462	5.34263	5.44142	5.72843	0.131814	5.31623	0.140275	COMMD4	COMM domain containing 4	Cytoplasm	other	Common_Between_RNAseq_&_Microarray
G1389	Gas2	1	108304939..108405240	100302	3.5395	3.52207	3.7763	3.74008	3.66752	3.67828	3.61262	0.142016	3.69529	0.0391608	GAS2	growth arrest-specific 2	Cytoplasm	other	Common_Between_RNAseq_&_Microarray
G13894	Gramd1b	8	61211947..61373438	161492	3.50248	3.53701	3.5518	3.63717	3.61729	3.746	3.53043	0.0253136	3.66682	0.0692888	GRAMD1B	GRAM domain containing 1B	Other	other	RNAseq_Specific
G13895	Scn3b	8	complement(61379752..61402266)	22515	5.76022	6.07028	5.76248	5.97739	5.91576	5.90605	5.86432	0.178363	5.93307	0.0386919	SCN3B	sodium channel, voltage-gated, type III, beta subunit	Plasma Membrane	ion channel	Common_Between_RNAseq_&_Microarray
G13896	Zfp202	8	complement(61469449..61489701)	20253	3.1092	3.12912	3.32604	3	3.05028	3	3.18812	0.119858	3.01676	0.0290296	ZNF202	zinc finger protein 202	Nucleus	transcription regulator	RNAseq_Specific
G1390	Svip	1	complement(108412833..108415318)	2486	3.73193	3.79714	3.83808	3.93791	3.65843	3.88228	3.78905	0.0535354	3.82621	0.147939	SVIP	small VCP/p97-interacting protein	Cytoplasm	other	Common_Between_RNAseq_&_Microarray
G13911	Scamp5	8	complement(61999367..62006968)	7602	4.87697	4.63374	4.34843	5.28141	5.03677	5.04203	4.61971	0.264551	5.12007	0.139746	Scamp5	secretory carrier membrane protein 5	Cytoplasm	other	RNAseq_Specific
G13913	Cox5a	8	62075284..62087001	11718	7.5781	7.6196	7.78256	7.7702	7.93682	7.86319	7.66009	0.108079	7.85674	0.083501	COX5A	cytochrome c oxidase subunit Va	Cytoplasm	enzyme	Common_Between_RNAseq_&_Microarray
G13914	RGD1310727	8	62094551..62097943	3393	3.99198	4.13162	4.05632	4.34063	3.98105	3.99693	4.05997	0.069893	4.1062	0.203175
G13915	Mpi	8	complement(62101461..62109361)	7901	5.97739	5.93581	5.86195	5.86332	5.95745	5.94369	5.92505	0.0584659	5.92148	0.0508427	MPI	mannose phosphate isomerase	Cytoplasm	enzyme	Common_Between_RNAseq_&_Microarray
G13916	Scamp2	8	62119185..62145786	26602	3.27706	3.35948	3.47494	3.26883	3.46256	3.55303	3.37049	0.0993982	3.42814	0.145192	SCAMP2	secretory carrier membrane protein 2	Cytoplasm	transporter	Common_Between_RNAseq_&_Microarray
G13920	Csk	8	complement(62183287..62187910)	4624	5.24917	5.27378	5.25749	5.51963	5.52057	5.57152	5.26015	0.0125213	5.53724	0.0296919	CSK	c-src tyrosine kinase	Cytoplasm	kinase	Common_Between_RNAseq_&_Microarray
G13923	Edc3	8	62263516..62302963	39448	3	3	3.03455	3.04768	3	3	3.01152	0.0199464	3.01589	0.0275284	EDC3	enhancer of mRNA decapping 3	Cytoplasm	other	RNAseq_Specific
G13924	Clk3	8	complement(62305184..62318918)	13735	6.02591	5.89057	6.11697	5.46888	5.54551	5.44359	6.01115	0.11392	5.48599	0.0530699	CLK3	CDC-like kinase 3	Nucleus	kinase	Common_Between_RNAseq_&_Microarray
G13926	Ubl7	8	62472012..62489306	17295	5.55934	5.60452	5.57531	5.33141	5.4723	5.49265	5.57972	0.0229093	5.43212	0.0878068	UBL7	ubiquitin-like 7 (bone marrow stromal cell-derived)	Other	other	Common_Between_RNAseq_&_Microarray
G13927	Sema7a	8	62499077..62521157	22081	4.72466	4.82578	4.59215	5.10196	4.85174	5.03896	4.7142	0.117166	4.99755	0.13015	SEMA7A	semaphorin 7A, GPI membrane anchor (John Milton Hagen blood group)	Plasma Membrane	transmembrane receptor	RNAseq_Specific
G13936	Stoml1	8	62813283..62820361	7079	5.36577	5.25352	4.95275	5.25504	5.10951	5.26407	5.19068	0.21356	5.20954	0.0867463	STOML1	stomatin (EPB72)-like 1	Other	other	Common_Between_RNAseq_&_Microarray
G13937	Loxl1	8	complement(62843791..62868157)	24367	3.42346	3.5786	3.25985	3	3	3	3.42063	0.159393	3	0	LOXL1	lysyl oxidase-like 1	Extracellular Space	enzyme	Common_Between_RNAseq_&_Microarray
G1394	ENSRNOG00000047154	1	112865798..113069722	203925	3.48393	3.72486	3.55914	3.61906	3.50945	3.33535	3.58931	0.123266	3.48796	0.143072	LOC100910839	leucine zipper protein 2-like	Other	other	Common_Between_RNAseq_&_Microarray
G13942	RGD1562618	8	63057200..63067429	10230	5.45003	5.31935	5.4356	5.30844	5.43776	5.46839	5.40166	0.07165	5.40487	0.0848959	C15orf59	chromosome 15 open reading frame 59	Other	other	Common_Between_RNAseq_&_Microarray
G13943	Cd276	8	complement(63090340..63120668)	30329	4.53424	4.51259	4.36639	4.35374	4.31338	4.40171	4.47107	0.0913055	4.35627	0.0442181	CD276	CD276 molecule	Plasma Membrane	other	RNAseq_Specific
G13944	Nptn	8	63149055..63213749	64695	7.64159	7.74597	7.63233	7.84251	7.68533	7.76717	7.6733	0.0631083	7.765	0.0786117	NPTN	neuroplastin	Plasma Membrane	other	Common_Between_RNAseq_&_Microarray
G13947	Neo1	8	complement(63421646..63524303)	102658	3.95151	3.84964	3.61729	3.8008	3.69568	3.75719	3.80615	0.171303	3.75122	0.0528139	NEO1	neogenin 1	Plasma Membrane	transcription regulator	Common_Between_RNAseq_&_Microarray
G13948	Adpgk	8	63850863..63878782	27920	4.71017	4.66959	4.75647	5.20566	5.10846	5.10028	4.71208	0.0434718	5.13813	0.0586222	ADPGK	ADP-dependent glucokinase	Other	kinase	Common_Between_RNAseq_&_Microarray
G13949	Bbs4	8	complement(63883342..63916346)	33005	5.29453	5.32584	5.35382	5.33479	5.31245	5.36751	5.32473	0.0296615	5.33825	0.0276916	BBS4	Bardet-Biedl syndrome 4	Cytoplasm	other	Common_Between_RNAseq_&_Microarray
G1395	Gabrg3	1	complement(113167703..113438056)	270354	3.0924	3.27557	3.30284	3.24775	3.20224	3	3.2236	0.114437	3.15	0.131878	GABRG3	gamma-aminobutyric acid (GABA) A receptor, gamma 3	Plasma Membrane	ion channel	RNAseq_Specific
G13950	Arih1	8	complement(63928310..64030505)	102196	3.98424	4.07273	4.0537	4.43044	4.37304	4.27928	4.03689	0.0465811	4.36092	0.0763055	ARIH1	ariadne RBR E3 ubiquitin protein ligase 1	Cytoplasm	enzyme	RNAseq_Specific
G13952	Hexa	8	64087247..64112585	25339	5.81288	5.69181	5.78214	5.88935	5.8157	5.95327	5.76228	0.0629317	5.88611	0.0688389	HEXA	hexosaminidase A (alpha polypeptide)	Cytoplasm	enzyme	Common_Between_RNAseq_&_Microarray
G13953	Celf6	8	64126553..64191454	64902	7.63484	7.61843	7.32025	7.33332	7.09753	7.10088	7.5245	0.177082	7.17724	0.13518	CELF6	CUGBP, Elav-like family member 6	Other	other	RNAseq_Specific
G13954	Parp6	8	64203227..64235456	32230	5.328	5.22312	5.24117	5.40782	5.42454	5.41713	5.2641	0.0560745	5.4165	0.00837708	PARP6	poly (ADP-ribose) polymerase family, member 6	Other	other	Common_Between_RNAseq_&_Microarray
G13955	Pkm	8	64244179..64265969	21791	9.50453	9.35109	9.15209	9.10987	8.89012	8.98114	9.3359	0.176707	8.99371	0.11041	PKM	pyruvate kinase, muscle	Cytoplasm	kinase	Common_Between_RNAseq_&_Microarray
G13958	Senp8	8	complement(64321674..64335522)	13849	3.19675	3.2636	3.18093	3.19518	3.31377	3.13161	3.21376	0.0438793	3.21352	0.0924573	SENP8	SUMO/sentrin specific peptidase family member 8	Cytoplasm	peptidase	RNAseq_Specific
G13963	Lrrc49	8	complement(65233821..65339662)	105842	5.30276	5.29047	5.3188	5.34316	5.30148	5.27694	5.30401	0.0142083	5.30719	0.0334758	LRRC49	leucine rich repeat containing 49	Other	other	Common_Between_RNAseq_&_Microarray
G13964	Larp6	8	65362299..65382759	20461	3.69122	3.68056	3.59182	3.38456	3.50248	3.38179	3.65453	0.0545693	3.42294	0.0688911	LARP6	La ribonucleoprotein domain family, member 6	Other	other	RNAseq_Specific
G13965	Uaca	8	65436328..65524224	87897	3	3.01417	3.04593	3.27183	3.13161	3.47106	3.02003	0.0235224	3.2915	0.170577	Uaca	uveal autoantigen with coiled-coil domains and ankyrin repeats	Other	other	Common_Between_RNAseq_&_Microarray
G13966	Tle3	8	66038798..66084091	45294	4.61443	4.71127	4.52332	4.66761	4.68068	4.77586	4.61634	0.0939901	4.70805	0.0590878	TLE3	transducin-like enhancer of split 3 (E(sp1) homolog, Drosophila)	Nucleus	other	Common_Between_RNAseq_&_Microarray
G13967	Rplp1	8	complement(66594523..66595860)	1338	8.32966	8.54901	8.7674	8.35245	8.38667	8.54901	8.54869	0.218869	8.42938	0.105012	Gm13777	predicted gene 13777	Cytoplasm	other	Common_Between_RNAseq_&_Microarray
G13970	Glce	8	complement(66744887..66757177)	12291	4.18295	4.16738	3.79714	4.39793	4.27071	4.00773	4.04915	0.218392	4.22546	0.198996	GLCE	glucuronic acid epimerase	Cytoplasm	enzyme	Common_Between_RNAseq_&_Microarray
G13974	Coro2b	8	complement(67107334..67177186)	69853	4.80895	4.88748	4.78746	5.04159	5.03124	5.28844	4.82796	0.0526503	5.12042	0.145597	CORO2B	coronin, actin binding protein, 2B	Other	other	Common_Between_RNAseq_&_Microarray
G13977	Fem1b	8	complement(67424001..67437273)	13273	3.20224	3.45272	3	3.56709	3.27481	3.21702	3.21832	0.22679	3.35297	0.187669	FEM1B	fem-1 homolog b (C. elegans)	Nucleus	transcription regulator	RNAseq_Specific
G13978	Cln6	8	67461962..67476917	14956	3.16817	3.09664	3.14554	3.12585	3.09493	3.19833	3.13678	0.0365622	3.1397	0.053074	CLN6	ceroid-lipofuscinosis, neuronal 6, late infantile, variant	Cytoplasm	other	RNAseq_Specific
G1398	Gabra5	1	complement(113844283..113955085)	110803	4.04409	4.37896	4.25229	3.83149	3.49993	3.55914	4.22511	0.169084	3.63019	0.17683	GABRA5	gamma-aminobutyric acid (GABA) A receptor, alpha 5	Plasma Membrane	ion channel	Common_Between_RNAseq_&_Microarray
G13980	Pias1	8	complement(67500467..67597766)	97300	3.44876	3.43551	3.4448	3.57438	3.40379	3.52143	3.44302	0.00680394	3.49987	0.0873108	PIAS1	protein inhibitor of activated STAT, 1	Nucleus	transcription regulator	Common_Between_RNAseq_&_Microarray
G13982	Map2k5	8	complement(67784869..68009803)	224935	4.52269	4.40681	4.47035	4.25002	4.29884	4.27631	4.46662	0.0580315	4.27506	0.024432	MAP2K5	mitogen-activated protein kinase kinase 5	Cytoplasm	kinase	Common_Between_RNAseq_&_Microarray
G13983	RGD1309779	8	complement(68035524..68040147)	4624	4.47002	4.44872	4.38208	4.29148	4.44407	4.23288	4.4336	0.0458768	4.32281	0.109027	C15orf61	chromosome 15 open reading frame 61	Other	other	Common_Between_RNAseq_&_Microarray
G13985	Aagab	8	68247490..68284415	36926	4.39447	4.37547	4.21205	4.45036	4.30322	4.2572	4.32733	0.100282	4.33693	0.100894	AAGAB	alpha- and gamma-adaptin binding protein	Cytoplasm	other	Common_Between_RNAseq_&_Microarray
G13986	SMAD3	8	complement(68274137..68397727)	123591	3.80645	3.7352	3.70178	3.79767	3.80494	3.7593	3.74781	0.0534615	3.7873	0.0245224	SMAD3	SMAD family member 3	Nucleus	transcription regulator	Common_Between_RNAseq_&_Microarray
G13990	Rpl4	8	68827907..68833042	5136	8.87894	8.85275	8.95466	8.74402	8.80184	8.76643	8.89545	0.0529215	8.77076	0.02915	RPL4	ribosomal protein L4	Cytoplasm	enzyme	Common_Between_RNAseq_&_Microarray
G13991	Snapc5	8	68833944..68837775	3832	3.84161	4.12085	3.78888	4.16697	4.05023	3.96541	3.91712	0.178402	4.06087	0.1012	SNAPC5	small nuclear RNA activating complex, polypeptide 5, 19kDa	Nucleus	transcription regulator	RNAseq_Specific
G13992	Map2k1	8	complement(68841356..69431569)	590214	9.7888	9.84229	9.7915	10.2326	9.97847	9.97847	9.80753	0.0301338	10.0632	0.146716	MAP2K1	mitogen-activated protein kinase kinase 1	Cytoplasm	kinase	Common_Between_RNAseq_&_Microarray
G13993	Ids	8	complement(69158390..69174456)	16067	5.06227	5.15471	4.50694	5.62498	5.01591	5.09227	4.90797	0.350366	5.24438	0.331807	IDS	iduronate 2-sulfatase	Cytoplasm	enzyme	Common_Between_RNAseq_&_Microarray
G13994	RGD1562747	8	69193023..69196651	3629	3.14065	3.27332	3.31087	3.18964	3.4335	3.32965	3.24161	0.0894314	3.3176	0.122373	CXorf40A/CXorf40B	chromosome X open reading frame 40A	Other	other	Common_Between_RNAseq_&_Microarray
G13998	ENSRNOG00000043068	8	69463020..69477177	14158	3	3.09409	3.08816	3	3	3.1184	3.06075	0.0526945	3.03947	0.0683579	TIPIN	TIMELESS interacting protein	Nucleus	other	RNAseq_Specific
G13999	Dis3l	8	complement(69480088..69516482)	36395	3.3203	3.37347	3.24698	3.65843	3.66979	3.64642	3.31358	0.063512	3.65821	0.0116867	DIS3L	DIS3 mitotic control homolog (S. cerevisiae)-like	Cytoplasm	enzyme	Common_Between_RNAseq_&_Microarray
G14001	Rab11a	8	complement(69896587..69919171)	22585	6.3146	6.57092	6.52074	6.64753	6.73342	6.72642	6.46875	0.135834	6.70246	0.0476987	RAB11A	RAB11A, member RAS oncogene family	Cytoplasm	enzyme	Common_Between_RNAseq_&_Microarray
G14004	Vwa9	8	70146546..70170129	23584	4.41294	4.46707	4.43744	4.1881	4.43677	4.43544	4.43915	0.0271029	4.35344	0.14319	VWA9	von Willebrand factor A domain containing 9	Cytoplasm	other	Common_Between_RNAseq_&_Microarray
G14005	Ptplad1	8	complement(70170452..70207419)	36968	6.74329	6.85379	6.8062	6.8569	6.81967	6.69585	6.80109	0.055429	6.79081	0.0843123	PTPLAD1	protein tyrosine phosphatase-like A domain containing 1	Cytoplasm	other	Common_Between_RNAseq_&_Microarray
G14008	Dpp8	8	70219642..70273860	54219	4.70713	4.82478	4.70769	5.0383	5.04749	4.99432	4.74654	0.0677657	5.0267	0.0284209	Dpp8	dipeptidylpeptidase 8	Other	other	Common_Between_RNAseq_&_Microarray
G14009	Igdcc4	8	70300509..70322185	21677	3.53826	3.34248	3.07106	3.52828	3.35738	3.48908	3.31727	0.234615	3.45825	0.0895289	IGDCC4	immunoglobulin superfamily, DCC subclass, member 4	Plasma Membrane	other	Common_Between_RNAseq_&_Microarray
G1401	Gabrb3	1	114022939..114275043	252105	4.30468	4.56133	4.11504	4.4697	4.12502	4.10585	4.32702	0.223982	4.23352	0.204758	GABRB3	gamma-aminobutyric acid (GABA) A receptor, beta 3	Plasma Membrane	ion channel	Common_Between_RNAseq_&_Microarray
G14012	Parp16	8	70401838..70424172	22335	3	3	3	3	3.03541	3.18726	3	0	3.07422	0.0994775	PARP16	poly (ADP-ribose) polymerase family, member 16	Cytoplasm	other	RNAseq_Specific
G14014	Clpx	8	70480810..70535360	54551	4.29369	4.27818	4.35198	4.31338	4.29222	4.2666	4.30795	0.0389131	4.29073	0.0234249	CLPX	caseinolytic mitochondrial matrix peptidase chaperone subunit	Cytoplasm	enzyme	Common_Between_RNAseq_&_Microarray
G14015	Pdcd7	8	70553737..70568103	14367	4.31879	4.37478	4.33277	4.20816	4.31591	4.18929	4.34212	0.029142	4.23778	0.0683129	PDCD7	programmed cell death 7	Nucleus	other	Common_Between_RNAseq_&_Microarray
G14020	Mtfmt	8	70644131..70674636	30506	3.67715	3.57438	3.74277	3.46256	3.78209	3.5475	3.66477	0.0848764	3.59739	0.165499	MTFMT	mitochondrial methionyl-tRNA formyltransferase	Cytoplasm	enzyme	Common_Between_RNAseq_&_Microarray
G14021	Spg21	8	70682806..70710180	27375	4.65906	4.76844	4.72439	4.57501	4.69301	4.84948	4.7173	0.0550346	4.70583	0.137686	SPG21	spastic paraplegia 21 (autosomal recessive, Mast syndrome)	Plasma Membrane	enzyme	Common_Between_RNAseq_&_Microarray
G14023	Plekho2	8	complement(70781065..70804767)	23703	3	3	3	3	3	3.01683	3	0	3.00561	0.00971705	PLEKHO2	pleckstrin homology domain containing, family O member 2	Cytoplasm	other	RNAseq_Specific
G14026	Oaz2	8	70899390..70913165	13776	7.75746	7.75171	7.70511	7.91942	7.88041	7.88335	7.73809	0.0287101	7.89439	0.0217277	OAZ2	ornithine decarboxylase antizyme 2	Cytoplasm	other	Common_Between_RNAseq_&_Microarray
G14028	Trip4	8	complement(71051695..71205615)	153921	3.39008	3.33322	3.15933	3.5314	3.43551	3.43084	3.29421	0.12022	3.46591	0.0567559	TRIP4	thyroid hormone receptor interactor 4	Nucleus	transcription regulator	RNAseq_Specific
G14031	Ppib	8	71388458..71394501	6044	6.18953	6.13873	6.46751	6.67814	6.92467	6.92467	6.26526	0.17699	6.84249	0.142332	PPIB	peptidylprolyl isomerase B (cyclophilin B)	Cytoplasm	enzyme	Common_Between_RNAseq_&_Microarray
G14033	Snx1	8	complement(71414978..71453464)	38487	5.22022	5.24917	5.2179	5.19486	5.24117	5.14904	5.2291	0.0174202	5.19502	0.046065	SNX1	sorting nexin 1	Cytoplasm	transporter	Common_Between_RNAseq_&_Microarray
G14034	Fam96a	8	71455205..71467170	11966	3.96957	4.15286	4.17855	4.06713	4.12085	4.09318	4.10033	0.113965	4.09372	0.0268683	FAM96A	family with sequence similarity 96, member A	Extracellular Space	other	Common_Between_RNAseq_&_Microarray
G14037	Herc1	8	71775427..71862567	87141	4.69993	4.75862	4.65962	4.44374	4.32312	4.21438	4.70606	0.0497828	4.32708	0.11473	HERC1	HECT and RLD domain containing E3 ubiquitin protein ligase family member 1	Cytoplasm	other	Common_Between_RNAseq_&_Microarray
G14039	Usp3	8	complement(71875689..71890546)	14858	3	3	3.11172	3	3	3	3.03724	0.0644988	3	0	USP3	ubiquitin specific peptidase 3	Cytoplasm	peptidase	RNAseq_Specific
G1404	ENSRNOG00000021507	1	114425908..114534783	108876	3.59243	4.01267	3.49356	3.91128	3.69847	3.75771	3.69955	0.275634	3.78915	0.109832	LOC100910839	leucine zipper protein 2-like	Other	other	Common_Between_RNAseq_&_Microarray
G14042	ENSRNOG00000050648	8	complement(72142803..72160730)	17928	4.36639	4.60968	4.65191	4.62325	4.75862	4.73173	4.54266	0.154108	4.70453	0.0716627	RGD1559979	similar to APH1B homolog (C.elegans)	Other	other	RNAseq_Specific
G14048	Rsl24d1	8	complement(73286446..73295207)	8762	5.15107	5.2078	5.15673	5.30003	5.33426	5.35081	5.17187	0.0312488	5.32837	0.0258968	RSL24D1	ribosomal L24 domain containing 1	Nucleus	other	RNAseq_Specific
G14050	Rab27a	8	complement(73311542..73366647)	55106	3	3	3	3.19833	3.1999	3.19833	3	0	3.19885	0.000907059	RAB27A	RAB27A, member RAS oncogene family	Cytoplasm	enzyme	RNAseq_Specific
G14052	Ccpg1	8	complement(73397117..73429325)	32209	6.67143	6.78234	6.75789	6.74329	6.58721	6.62731	6.73722	0.0582706	6.6526	0.0810521	CCPG1	cell cycle progression 1	Other	other	Common_Between_RNAseq_&_Microarray
G14054	Gm5918	8	73429543..73434009	4467	3.28001	3.24166	3.45667	3.08732	3.12996	3	3.32611	0.114682	3.07243	0.0662477
G14060	Nedd4	8	complement(73679021..73716822)	37802	7.05942	7.0481	6.89722	7.07797	7.00442	6.947	7.00158	0.0905574	7.00979	0.0656529	NEDD4	neural precursor cell expressed, developmentally down-regulated 4, E3 ubiquitin protein ligase	Cytoplasm	enzyme	Common_Between_RNAseq_&_Microarray
G14061	Rfx7	8	complement(73807892..73927996)	120105	3.11423	3.11256	3.24166	3.0659	3.08049	3	3.15615	0.0740579	3.0488	0.0428835	RFX7	regulatory factor X, 7	Other	other	Common_Between_RNAseq_&_Microarray
G14062	Tex9	8	73967926..74003852	35927	4.51259	4.25381	4.64502	4.44407	4.57044	4.3449	4.47047	0.198974	4.45314	0.113045	TEX9	testis expressed 9	Other	other	RNAseq_Specific
G14065	Zfp280d	8	complement(74134797..74211059)	76263	4.41531	4.52205	4.59036	4.29148	4.29811	4.13531	4.50924	0.088227	4.24163	0.0921355	ZNF280D	zinc finger protein 280D	Other	other	RNAseq_Specific
G14066	ENSRNOG00000048391	8	74423476..74618938	195463	3.21702	3.02926	3.54134	3.40652	3.5469	3.47494	3.26254	0.259062	3.47612	0.0701976
G14068	Tcf12	8	74682708..74733231	50524	3.21857	3.40449	3.27183	3.70894	3.40379	3.59959	3.29829	0.0957433	3.57077	0.154599	TCF12	transcription factor 12	Nucleus	transcription regulator	Common_Between_RNAseq_&_Microarray
G14069	Cgnl1	8	74802444..74948694	146251	3.64352	3.40039	3.19283	3.7673	3.3658	3.52828	3.41225	0.22558	3.5538	0.201965	CGNL1	cingulin-like 1	Plasma Membrane	other	Common_Between_RNAseq_&_Microarray
G14071	ENSRNOG00000017719	8	75085452..75088146	2695	6.92467	7.05088	6.70729	6.9774	6.99879	6.95705	6.89428	0.173799	6.97775	0.0208724	GCOM1	GRINL1A complex locus 1	Nucleus	other	RNAseq_Specific
G14077	Adam10	8	complement(75843846..75915593)	71748	4.29222	4.35303	3.94777	4.38691	4.12294	4.18573	4.19767	0.218546	4.23186	0.137898	ADAM10	ADAM metallopeptidase domain 10	Plasma Membrane	peptidase	Common_Between_RNAseq_&_Microarray
G14078	Fam63b	8	75993155..76047318	54164	3.10084	3.18408	3.14309	3.43949	3.24243	3.25078	3.14267	0.0416252	3.3109	0.111436	FAM63B	family with sequence similarity 63, member B	Other	transporter	Common_Between_RNAseq_&_Microarray
G14080	RGD1307526	8	complement(76059827..76065681)	5855	4.91525	4.93278	5.11679	4.75647	4.80895	4.84171	4.98828	0.111643	4.80238	0.0429954
G14081	Rnf111	8	76142477..76218329	75853	3.44744	3.48843	3.50567	3.63717	3.6366	3.58283	3.48051	0.0299081	3.61887	0.0312082	RNF111	ring finger protein 111	Nucleus	enzyme	Common_Between_RNAseq_&_Microarray
G14083	Myo1e	8	complement(76241676..76323566)	81891	3	3	3	3.09664	3	3.04854	3	0	3.04839	0.0483189	MYO1E	myosin IE	Cytoplasm	enzyme	RNAseq_Specific
G14085	Fam81a	8	76497582..76554483	56902	3.43018	3.38109	3.30576	3.38179	3.10084	3.03015	3.37234	0.0626711	3.17093	0.186004	FAM81A	family with sequence similarity 81, member A	Other	other	RNAseq_Specific
G14088	Gtf2a2	8	complement(76640787..76653929)	13143	5.49313	5.57531	5.69502	5.45119	5.63677	5.53232	5.58782	0.101525	5.54009	0.0930343	GTF2A2	general transcription factor IIA, 2, 12kDa	Nucleus	transcription regulator	Common_Between_RNAseq_&_Microarray
G14089	Bnip2	8	complement(76662499..76675895)	13397	4.02337	4.1279	4.17176	4.20541	4.19206	4.11338	4.10768	0.076232	4.17028	0.0497261	BNIP2	BCL2/adenovirus E1B 19kDa interacting protein 2	Cytoplasm	other	Common_Between_RNAseq_&_Microarray
G1409	Tubgcp5	1	115192961..115228228	35268	4.24889	4.24167	4.26322	3.96728	4.25002	4.10123	4.25126	0.010966	4.10618	0.141438	TUBGCP5	tubulin, gamma complex associated protein 5	Cytoplasm	other	RNAseq_Specific
G14091	Aph1b	8	complement(76942439..76963484)	21046	3.29551	3.6567	3.76891	4.03046	3.91847	4.07743	3.5737	0.247372	4.00879	0.0816701	APH1B	APH1B gamma secretase subunit	Plasma Membrane	peptidase	Common_Between_RNAseq_&_Microarray
G14092	Rab8b	8	complement(76975470..77047522)	72053	3.08732	3.05984	3.06762	3.16817	3.12254	3.05028	3.0716	0.0141616	3.11366	0.0594436	RAB8B	RAB8B, member RAS oncogene family	Cytoplasm	enzyme	Common_Between_RNAseq_&_Microarray
G14095	Rps27l	8	77076269..77078924	2656	4.94784	4.63867	5.02239	4.56587	5.01236	4.9076	4.86964	0.203466	4.82861	0.233489	Rps27l	ribosomal protein S27-like	Nucleus	translation regulator	Common_Between_RNAseq_&_Microarray
G14096	Lactb	8	complement(77083026..77099150)	16125	3.363	3.36789	3.45206	3.45074	3.53203	3.51134	3.39431	0.0500665	3.49804	0.0422488	LACTB	lactamase, beta	Cytoplasm	other	RNAseq_Specific
G14097	TPM1	8	complement(77147583..77174392)	26810	5.06768	5.14109	5.07605	5.14149	5.04094	5.2801	5.09494	0.0401836	5.15418	0.120085	TPM1	tropomyosin 1 (alpha)	Cytoplasm	other	Common_Between_RNAseq_&_Microarray
G1410	Cyfip1	1	115265170..115353514	88345	4.27071	4.33635	4.2572	4.40239	4.37338	4.47327	4.28809	0.0423382	4.41635	0.0513857	CYFIP1	cytoplasmic FMR1 interacting protein 1	Cytoplasm	other	Common_Between_RNAseq_&_Microarray
G14103	Vps13c	8	78012253..78174561	162309	5.12094	4.95182	5.0383	4.49295	4.50725	4.29884	5.03702	0.0845706	4.43301	0.116417	Vps13c	vacuolar protein sorting 13 homolog C (S. cerevisiae)	Other	other	RNAseq_Specific
G14107	Anxa2	8	80014371..80050842	36472	3.86116	3.78209	3.91128	4.63953	4.6002	5.13762	3.85151	0.065134	4.79245	0.29957	ANXA2	annexin A2	Plasma Membrane	other	Common_Between_RNAseq_&_Microarray
G1411	Nipa2	1	complement(115354415..115378274)	23860	4.10376	4.10165	4.11003	4.52676	4.54324	4.58046	4.10515	0.00435933	4.55015	0.0275074	NIPA2	non imprinted in Prader-Willi/Angelman syndrome 2	Cytoplasm	other	Common_Between_RNAseq_&_Microarray
G14113	Fam214a	8	81535953..81559190	23238	5.01391	4.86363	4.91954	4.62296	4.67188	4.5494	4.93236	0.0759554	4.61475	0.0616505	FAM214A	family with sequence similarity 214, member A	Other	other	Common_Between_RNAseq_&_Microarray
G14114	Arpp19	8	81566087..81585228	19142	5.85885	6.04494	6.01178	6.15674	6.06533	6.07092	5.97186	0.0992601	6.09766	0.0512391	Arpp19	cAMP-regulated phosphoprotein 19	Other	other	Common_Between_RNAseq_&_Microarray
G14117	Gnb5	8	81861124..82010315	149192	8.27081	8.35245	8.20464	8.20464	8.17073	8.19973	8.27596	0.0740376	8.1917	0.0183263	GNB5	guanine nucleotide binding protein (G protein), beta 5	Plasma Membrane	enzyme	Common_Between_RNAseq_&_Microarray
G14118	ENSRNOG00000008926	8	81880465..81889635	9171	4.96205	5.17123	5.10846	4.56496	4.70105	4.55614	5.08058	0.107338	4.60739	0.0812365	GNB5	guanine nucleotide binding protein (G protein), beta 5	Plasma Membrane	enzyme	Common_Between_RNAseq_&_Microarray
G1412	Nipa1	1	complement(115392570..115410234)	17665	3.83048	3.93839	3.7673	4.32059	4.16254	4.14962	3.84539	0.0865128	4.21092	0.0952015	NIPA1	non imprinted in Prader-Willi/Angelman syndrome 1	Plasma Membrane	other	RNAseq_Specific
G14121	Leo1	8	81983992..82008425	24434	4.36111	4.44904	4.62208	4.87527	4.83746	4.82885	4.47741	0.132779	4.84719	0.0246916	LEO1	Leo1, Paf1/RNA polymerase II complex component, homolog (S. cerevisiae)	Nucleus	other	RNAseq_Specific
G14122	Tmod3	8	complement(82035312..82095422)	60111	4.36533	4.36991	4.59395	4.58196	4.49455	4.48042	4.44306	0.130691	4.51897	0.0550025	TMOD3	tropomodulin 3 (ubiquitous)	Cytoplasm	other	Common_Between_RNAseq_&_Microarray
G14123	Tmod2	8	complement(82109739..82135088)	25350	4.18374	4.3285	3.91847	4.33886	4.25457	4.29442	4.14357	0.207948	4.29595	0.042165	TMOD2	tropomodulin 2 (neuronal)	Cytoplasm	other	Common_Between_RNAseq_&_Microarray
G14125	Lysmd2	8	82162170..82177806	15637	4.65076	4.71592	5.02638	5.05293	5.11492	5.16944	4.79769	0.200718	5.11243	0.0582939	LYSMD2	LysM, putative peptidoglycan-binding, domain containing 2	Other	other	Common_Between_RNAseq_&_Microarray
G14126	Scg3	8	complement(82183497..82242336)	58840	7.33332	7.11313	7.40729	7.24983	7.39864	7.23293	7.28458	0.153017	7.2938	0.091183	SCG3	secretogranin III	Extracellular Space	other	Common_Between_RNAseq_&_Microarray
G14127	Bmp5	8	82266949..82526447	259499	3	3	3	3	3.00612	3	3	0	3.00204	0.00353536	BMP5	bone morphogenetic protein 5	Extracellular Space	growth factor	RNAseq_Specific
G14128	Hmgcll1	8	82645962..82780148	134187	4.41598	4.4497	4.53236	4.196	4.33814	4.13777	4.46601	0.0598809	4.22397	0.103071	HMGCLL1	3-hydroxymethyl-3-methylglutaryl-CoA lyase-like 1	Cytoplasm	enzyme	RNAseq_Specific
G1413	Herc2	1	115459547..115658973	199427	4.59275	4.70161	4.64443	4.24053	4.09785	3.98879	4.64626	0.0544503	4.10906	0.126246	HERC2	HECT and RLD domain containing E3 ubiquitin protein ligase 2	Cytoplasm	enzyme	Common_Between_RNAseq_&_Microarray
G14136	Gclc	8	84627768..84666185	38418	4.46772	4.47588	4.49487	4.66019	4.68012	4.67559	4.47949	0.0139312	4.67197	0.0104483	GCLC	glutamate-cysteine ligase, catalytic subunit	Cytoplasm	enzyme	Common_Between_RNAseq_&_Microarray
G14137	Elovl5	8	84825602..84851400	25799	7.02343	7.12609	6.87355	7.2564	6.98431	6.9774	7.00769	0.127005	7.0727	0.159122	ELOVL5	ELOVL fatty acid elongase 5	Cytoplasm	enzyme	Common_Between_RNAseq_&_Microarray
G14139	Fbxo9	8	complement(84953190..84978347)	25158	5.75556	5.78646	5.65463	5.73484	5.67072	5.51554	5.73222	0.0689427	5.64037	0.112759	FBXO9	F-box protein 9	Cytoplasm	enzyme	Common_Between_RNAseq_&_Microarray
G14143	Gsta4	8	85067703..85078443	10741	5.33515	5.46953	5.6094	5.70625	4.88042	5.35892	5.47136	0.137134	5.3152	0.41465	Gsta4	glutathione S-transferase, alpha 4	Cytoplasm	enzyme	Common_Between_RNAseq_&_Microarray
G14152	Mto1	8	85357705..85381270	23566	3.01595	3.19833	3.04768	3.16253	3.22476	3.04157	3.08732	0.0974343	3.14295	0.093146	MTO1	mitochondrial tRNA translation optimization 1	Cytoplasm	enzyme	Common_Between_RNAseq_&_Microarray
G14153	Eef1a1	8	complement(85388157..85390106)	1950	11.5407	11.5407	11.328	11.328	11.328	11.328	11.4698	0.122853	11.328	0	Eef1a1	eukaryotic translation elongation factor 1 alpha 1	Cytoplasm	translation regulator	Common_Between_RNAseq_&_Microarray
G14154	Slc17a5	8	complement(85440757..85475700)	34944	3.09409	3.18645	3.17855	3.47364	3.35738	3.56709	3.15303	0.0511951	3.46603	0.105063	SLC17A5	solute carrier family 17 (acidic sugar transporter), member 5	Plasma Membrane	transporter	Common_Between_RNAseq_&_Microarray
G14162	ENSRNOG00000010657	8	86749196..86757691	8496	4.35621	4.08083	4.4697	3.75878	4.0476	3.94451	4.30225	0.199969	3.91696	0.146368	LOC100363289	LRRGT00022-like	Other	other	RNAseq_Specific
G14163	Cox7a2	8	complement(86753412..86757509)	4098	7.26177	7.54604	7.44492	7.09542	7.25106	7.14134	7.41758	0.144093	7.16261	0.0799723	COX7A2	cytochrome c oxidase subunit VIIa polypeptide 2 (liver)	Cytoplasm	enzyme	Common_Between_RNAseq_&_Microarray
G14164	Tmem30a	8	complement(86767828..86789807)	21980	6.92817	7.02693	6.84384	7.45499	7.21442	7.1626	6.93298	0.091638	7.27734	0.156014	TMEM30A	transmembrane protein 30A	Cytoplasm	other	Common_Between_RNAseq_&_Microarray
G14166	Senp6	8	87025318..87101909	76592	4.68936	4.80019	4.79371	4.87552	4.84545	4.78667	4.76109	0.0622003	4.83588	0.0451906	SENP6	SUMO1/sentrin specific peptidase 6	Cytoplasm	peptidase	Common_Between_RNAseq_&_Microarray
G14168	Myo6	8	87169192..87264964	95773	3.14065	3.12666	3.08476	3.25304	3.05638	3.17217	3.11735	0.0290824	3.16053	0.0988466	MYO6	myosin VI	Cytoplasm	other	Common_Between_RNAseq_&_Microarray
G14174	IRAK1BP1	8	89871572..89885291	13720	3.363	3.51829	3.34248	3.11505	3.04768	3.13818	3.40792	0.0961311	3.1003	0.0470163	IRAK1BP1	interleukin-1 receptor-associated kinase 1 binding protein 1	Other	other	Common_Between_RNAseq_&_Microarray
G14176	Hmgn3	8	complement(90151453..90187798)	36346	5.97223	6.07563	6.25776	5.5694	5.82464	5.66519	6.10188	0.144565	5.68641	0.128935	Hmgn3	high mobility group nucleosomal binding domain 3	Nucleus	other	Common_Between_RNAseq_&_Microarray
G14179	Sh3bgrl2	8	90589261..90680680	91420	3	3	3	3.09747	3.02394	3.05723	3	0	3.05955	0.0368174	Sh3bgrl2	SH3 domain binding glutamic acid-rich protein like 2	Nucleus	other	RNAseq_Specific
G14182	Elovl4	8	complement(90830571..90857120)	26550	4.45628	4.54015	4.55614	5.05685	4.93705	5.17223	4.51752	0.0536397	5.05538	0.117597	ELOVL4	ELOVL fatty acid elongase 4	Cytoplasm	enzyme	RNAseq_Specific
G14183	Ttk	8	90886762..90924325	37564	4.05718	4.08809	4.28149	3.94215	4.24167	4.05934	4.14225	0.121569	4.08105	0.150936	TTK	TTK protein kinase	Nucleus	kinase	RNAseq_Specific
G14184	Bckdhb	8	90982519..91173704	191186	4.20894	4.2167	4.34948	4.20424	4.31844	4.2666	4.25837	0.0790002	4.26309	0.0571805	BCKDHB	branched chain keto acid dehydrogenase E1, beta polypeptide	Cytoplasm	enzyme	Common_Between_RNAseq_&_Microarray
G14186	Fam46a	8	complement(92451691..92455379)	3689	3.50055	4.11046	4.00414	4.55766	4.21554	4.46218	3.87172	0.325802	4.41179	0.176538	FAM46A	family with sequence similarity 46, member A	Other	other	Common_Between_RNAseq_&_Microarray
G14188	Ibtk	8	complement(92839911..92905660)	65750	3.46323	3.46192	3.5518	3.50945	3.54503	3.50694	3.49232	0.0515213	3.52047	0.0213061	IBTK	inhibitor of Bruton agammaglobulinemia tyrosine kinase	Cytoplasm	other	Common_Between_RNAseq_&_Microarray
G14193	Ube3d	8	complement(93463078..93633601)	170524	3	3	3.05723	3	3	3	3.01908	0.0330426	3	0	UBE3D	ubiquitin protein ligase E3D	Other	other	RNAseq_Specific
G14194	Dopey1	8	93665370..93737976	72607	4.31084	4.33099	4.42707	4.18533	4.15043	3.98334	4.3563	0.0621127	4.10637	0.10796	DOPEY1	dopey family member 1	Cytoplasm	other	Common_Between_RNAseq_&_Microarray
G14195	Pgm3	8	complement(93739288..93756358)	17071	4.16617	4.21592	4.19915	4.34204	4.17497	4.18254	4.19374	0.0253119	4.23318	0.094347	PGM3	phosphoglucomutase 3	Cytoplasm	enzyme	RNAseq_Specific
G14196	Rwdd2a	8	93756515..93759639	3125	3.5512	3.2263	3.26586	3	3	3	3.34779	0.177269	3	0	RWDD2A	RWD domain containing 2A	Other	other	RNAseq_Specific
G14197	Me1	8	complement(93769078..93863618)	94541	5.56499	5.89603	6.02813	5.88643	6.03133	5.93499	5.82971	0.238585	5.95092	0.0737516	ME1	malic enzyme 1, NADP(+)-dependent, cytosolic	Cytoplasm	enzyme	Common_Between_RNAseq_&_Microarray
G14199	Snap91	8	complement(93963290..94074083)	110794	6.50207	6.5108	6.21781	6.68635	6.45459	6.6178	6.41023	0.166696	6.58625	0.119062	SNAP91	synaptosomal-associated protein, 91kDa	Plasma Membrane	other	Common_Between_RNAseq_&_Microarray
G1420	Bex1	1	complement(117724202..117725601)	1400	6.396	6.45343	6.58511	6.13196	6.31705	6.3087	6.47818	0.0969546	6.25257	0.104536	Bex1	brain expressed gene 1	Other	other	Common_Between_RNAseq_&_Microarray
G14201	Cyb5r4	8	94201539..94266045	64507	3.33535	3.18093	3.29991	3.38109	3.45797	3.39354	3.27206	0.0808889	3.41087	0.0412617	CYB5R4	cytochrome b5 reductase 4	Cytoplasm	enzyme	Common_Between_RNAseq_&_Microarray
G14202	Mrap2	8	94308773..94364872	56100	6.38309	6.10392	6.33932	6.11197	6.14893	6.11447	6.27544	0.150148	6.12512	0.0206566	MRAP2	melanocortin 2 receptor accessory protein 2	Cytoplasm	other	RNAseq_Specific
G14209	Snx14	8	complement(95519167..95583948)	64782	3.82084	4.69744	3.87984	3.94309	3.95709	3.91415	4.13271	0.489958	3.93811	0.021899	Snx14	sorting nexin 14	Other	other	Common_Between_RNAseq_&_Microarray
G1421	Ube3a	1	117746227..117834011	87785	4.44374	4.46251	4.7814	4.76949	4.6542	4.51449	4.56255	0.189761	4.64606	0.127696	UBE3A	ubiquitin protein ligase E3A	Nucleus	enzyme	Common_Between_RNAseq_&_Microarray
G14210	Syncrip	8	complement(95602783..95628111)	25329	4.30686	4.25457	4.39655	4.97771	4.80768	4.78694	4.31932	0.0718064	4.85744	0.104671	SYNCRIP	synaptotagmin binding, cytoplasmic RNA interacting protein	Nucleus	other	Common_Between_RNAseq_&_Microarray
G14211	ENSRNOG00000047963	8	complement(95694193..95697728)	3536	3.2576	3.66752	3.40039	4.16738	3.96126	4.07144	3.44184	0.208077	4.06669	0.103142
G14218	Mthfs	8	96071796..96121083	49288	3	3.07878	3.05117	3	3	3	3.04332	0.0399727	3	0	MTHFS	5,10-methenyltetrahydrofolate synthetase (5-formyltetrahydrofolate cyclo-ligase)	Cytoplasm	enzyme	RNAseq_Specific
G14221	Tmed3	8	complement(96576976..96584888)	7913	7.27839	7.33332	7.50447	7.79693	7.93396	7.90937	7.37206	0.117913	7.88009	0.0730583	TMED3	transmembrane emp24 protein transport domain containing 3	Cytoplasm	transporter	Common_Between_RNAseq_&_Microarray
G14224	Rasgrf1	8	96778646..96905924	127279	7.96134	8.03082	7.75	7.92342	7.64484	7.66188	7.91405	0.146257	7.74338	0.156152	Rasgrf1	RAS protein-specific guanine nucleotide-releasing factor 1	Plasma Membrane	other	Common_Between_RNAseq_&_Microarray
G14225	Ctsh	8	96939705..96958827	19123	4.96783	4.87379	4.98231	4.7233	4.90784	4.7533	4.94131	0.0589197	4.79481	0.0990251	CTSH	cathepsin H	Cytoplasm	peptidase	Common_Between_RNAseq_&_Microarray
G14226	MORF4L1	8	complement(96974730..96995688)	20959	8.77282	8.89012	8.68701	8.76643	8.74402	8.74402	8.78332	0.101962	8.75149	0.0129376	MORF4L1	mortality factor 4 like 1	Nucleus	other	RNAseq_Specific
G14228	Tbc1d2b	8	complement(97076275..97145782)	69508	3	3	3	3.13161	3.17934	3.26135	3	0	3.19077	0.0656241	TBC1D2B	TBC1 domain family, member 2B	Other	other	Common_Between_RNAseq_&_Microarray
G14237	Plod2	8	99462925..99545578	82654	4.42775	4.59752	4.38208	3	3.59901	3.38179	4.46911	0.113521	3.32694	0.30325	PLOD2	procollagen-lysine, 2-oxoglutarate 5-dioxygenase 2	Cytoplasm	enzyme	Common_Between_RNAseq_&_Microarray
G14239	RGD1309079	8	complement(101571619..101642463)	70845	3	3	3	3.02572	3	3.05984	3	0	3.02852	0.0300204	C3orf58	chromosome 3 open reading frame 58	Cytoplasm	other	RNAseq_Specific
G14240	Slc9a9	8	101787033..102485049	698017	3.15609	3.2576	3.17855	3.49737	3.51389	3.49034	3.19742	0.0533168	3.50054	0.0120881	SLC9A9	solute carrier family 9, subfamily A (NHE9, cation proton antiporter 9), member 9	Cytoplasm	transporter	RNAseq_Specific
G14243	Chst2	8	complement(102648882..102650474)	1593	5.06031	4.99161	4.71731	4.95275	4.54108	4.81564	4.92308	0.181481	4.76982	0.209625	CHST2	carbohydrate (N-acetylglucosamine-6-O) sulfotransferase 2	Cytoplasm	enzyme	Common_Between_RNAseq_&_Microarray
G14244	U2surp	8	complement(102704851..102757330)	52480	4.92403	4.88894	4.96783	5.01972	4.89163	4.69993	4.92694	0.0395276	4.87043	0.160946	U2SURP	U2 snRNP-associated SURP domain containing	Nucleus	other	Common_Between_RNAseq_&_Microarray
G14246	ENSRNOG00000033654	8	102801222..102809973	8752	5.48783	5.52356	5.62205	5.7824	5.95513	5.99593	5.54448	0.0695123	5.91115	0.113354	LOC501038	Ab2-060	Other	other	RNAseq_Specific
G14247	PCOLCE2	8	102910334..102934915	24582	3	3	3	3	3.00433	3.44612	3	0	3.15015	0.256327	PCOLCE2	procollagen C-endopeptidase enhancer 2	Extracellular Space	other	Common_Between_RNAseq_&_Microarray
G14248	Trpc1	8	complement(102955430..103005393)	49964	3.01059	3.24013	3.21702	3.59959	3.46974	3.62198	3.15591	0.126382	3.56377	0.0822034	TRPC1	transient receptor potential cation channel, subfamily C, member 1	Plasma Membrane	ion channel	Common_Between_RNAseq_&_Microarray
G14256	Atp1b3	8	complement(103638324..103669634)	31311	7.44492	7.33156	7.51092	7.50447	7.52917	7.67171	7.42913	0.090719	7.56845	0.0902754	ATP1B3	ATPase, Na+/K+ transporting, beta 3 polypeptide	Plasma Membrane	transporter	Common_Between_RNAseq_&_Microarray
G14259	Rnf7	8	complement(103774031..103783041)	9011	4.71237	4.76949	5.049	4.65363	4.84746	4.77373	4.84362	0.180143	4.75827	0.0978344	RNF7	ring finger protein 7	Nucleus	enzyme	Common_Between_RNAseq_&_Microarray
G14260	Rasa2	8	complement(103860860..103988460)	127601	3	3	3.31087	3.24396	3.2977	3.17217	3.10362	0.17948	3.23794	0.0629814	RASA2	RAS p21 protein activator 2	Cytoplasm	other	RNAseq_Specific
G14267	Slc25a36l1	8	complement(104412321..104441922)	29602	6.33458	6.27743	6.17393	6.18854	5.95896	5.6799	6.26198	0.0814355	5.94247	0.254719	SLC25A36	solute carrier family 25 (pyrimidine nucleotide carrier ), member 36	Cytoplasm	transporter	Common_Between_RNAseq_&_Microarray
G14270	Clstn2	8	complement(104768408..105478061)	709654	5.7108	5.80568	5.3088	5.54551	5.1472	5.16482	5.60843	0.263783	5.28584	0.225046	CLSTN2	calsyntenin 2	Plasma Membrane	transporter	RNAseq_Specific
G14274	Rbp1	8	105891148..105912684	21537	4.08937	4.17735	4.64097	3	3.51703	3.23936	4.30256	0.296354	3.25213	0.258753	RBP1	retinol binding protein 1, cellular	Extracellular Space	transporter	Common_Between_RNAseq_&_Microarray
G14278	Copb2	8	106034675..106045348	10674	6.02835	6.04144	5.93074	6.17423	6.10926	5.98641	6.00017	0.0604902	6.08996	0.0953835	Copb2	coatomer protein complex, subunit beta 2 (beta prime)	Cytoplasm	other	Common_Between_RNAseq_&_Microarray
G14279	Mrps22	8	complement(106047831..106060998)	13168	5.05315	5.01815	5.16178	5.04639	5.16644	5.12507	5.07769	0.0748961	5.11263	0.0609807	Mrps22	mitochondrial ribosomal protein S22	Cytoplasm	other	Common_Between_RNAseq_&_Microarray
G14286	Faim	8	106649798..106665256	15459	3.93458	4.0331	4.35303	4.097	4.42809	4.17097	4.1069	0.218772	4.23202	0.173779	FAIM	Fas apoptotic inhibitory molecule	Plasma Membrane	other	Common_Between_RNAseq_&_Microarray
G14290	Cep70	8	106921077..106973347	52271	4.32493	4.3014	4.33635	3.7593	3.97278	3.67715	4.32089	0.0178229	3.80308	0.152601	CEP70	centrosomal protein 70kDa	Cytoplasm	other	RNAseq_Specific
G14292	Mras	8	complement(107054728..107082507)	27780	5.23142	5.06768	4.9609	5.16482	5.10196	5.2078	5.08667	0.136255	5.1582	0.0532305	MRAS	muscle RAS oncogene homolog	Plasma Membrane	enzyme	RNAseq_Specific
G14294	Armc8	8	complement(107148284..107243975)	95692	4.41531	4.35162	4.39138	4.34737	4.36147	4.27146	4.3861	0.032169	4.32677	0.0484139	ARMC8	armadillo repeat containing 8	Other	other	Common_Between_RNAseq_&_Microarray
G14295	Dbr1	8	107251356..107262731	11376	3.24243	3.13982	3.37207	3.17536	3.12335	3.13325	3.25144	0.11639	3.14399	0.027618	DBR1	debranching RNA lariats 1	Nucleus	enzyme	RNAseq_Specific
G14297	Dzip1l	8	107305974..107339593	33620	3.57255	3.88374	3.74545	3.77524	3.84613	3.91704	3.73391	0.155917	3.84614	0.070901	DZIP1L	DAZ interacting zinc finger protein 1-like	Extracellular Space	other	RNAseq_Specific
G143	Stx7	1	complement(23721818..23761945)	40128	5.8525	5.97441	5.89069	5.76712	5.8107	5.77715	5.90587	0.0623577	5.78499	0.022822	STX7	syntaxin 7	Plasma Membrane	transporter	Common_Between_RNAseq_&_Microarray
G14302	Nck1	8	complement(108204373..108207897)	3525	4.75409	4.60643	4.80895	4.89818	5.01078	4.94081	4.72315	0.104744	4.94993	0.0568505	NCK1	NCK adaptor protein 1	Cytoplasm	kinase	Common_Between_RNAseq_&_Microarray
G14303	Slc35g2	8	complement(108269640..108296902)	27263	5.30039	5.38332	5.54535	5.8913	5.93864	6.05767	5.40969	0.12459	5.96253	0.08572	SLC35G2	solute carrier family 35, member G2	Cytoplasm	other	Common_Between_RNAseq_&_Microarray
G14304	Stag1	8	108373849..108760291	386443	3.34463	3.3203	3.33465	3.30796	3.37486	3.3658	3.33319	0.0122288	3.34954	0.0362936	STAG1	stromal antigen 1	Nucleus	other	Common_Between_RNAseq_&_Microarray
G14306	Pccb	8	complement(108785884..108836132)	50249	4.21903	4.1488	4.11755	3.78365	3.93791	3.79046	4.16179	0.0519763	3.83734	0.087164	PCCB	propionyl CoA carboxylase, beta polypeptide	Cytoplasm	enzyme	Common_Between_RNAseq_&_Microarray
G14307	Msl2	8	108873511..108895784	22274	3.10502	3.14145	3.10502	3.2263	3.11671	3.20614	3.11717	0.0210321	3.18305	0.0583266	MSL2	male-specific lethal 2 homolog (Drosophila)	Nucleus	other	Common_Between_RNAseq_&_Microarray
G14313	CEP63	8	complement(110462282..110513824)	51543	3.95242	3.94121	4.06105	3.67147	3.76197	3.63133	3.9849	0.0661927	3.68826	0.0669186	CEP63	centrosomal protein 63kDa	Cytoplasm	other	RNAseq_Specific
G14314	Anapc13	8	110505168..110513584	8417	4.43143	4.53705	4.67559	4.29333	4.47815	4.49199	4.54802	0.122449	4.42116	0.11092	ANAPC13	anaphase promoting complex subunit 13	Nucleus	other	Common_Between_RNAseq_&_Microarray
G14316	Ryk	8	110718666..110790096	71431	3.81368	3.89927	3.70178	4.00727	4.00683	3.99829	3.80491	0.0990375	4.00413	0.00506361	RYK	receptor-like tyrosine kinase	Plasma Membrane	kinase	RNAseq_Specific
G14318	Rab6b	8	111018332..111059791	41460	7.43302	7.47344	7.27839	7.60941	7.57246	7.46765	7.39495	0.102945	7.54984	0.0735368	RAB6B	RAB6B, member RAS oncogene family	Cytoplasm	enzyme	Common_Between_RNAseq_&_Microarray
G14319	Tf	8	complement(111064527..111112746)	48220	5.56407	5.12714	5.18993	4.98162	5.10154	4.97771	5.29371	0.236233	5.02029	0.0703944	TF	transferrin	Extracellular Space	transporter	Common_Between_RNAseq_&_Microarray
G14323	Cdv3	8	complement(111231870..111242236)	10367	4.03134	4.08426	3.79663	4.16456	3.98697	3.88764	3.97074	0.153089	4.01306	0.14029	CDV3	CDV3 homolog (mouse)	Cytoplasm	other	RNAseq_Specific
G14326	Tmem108	8	complement(111361212..111485621)	124410	3	3	3.13161	3.11671	3	3	3.04387	0.0759835	3.0389	0.0673848	TMEM108	transmembrane protein 108	Other	other	RNAseq_Specific
G14329	Uba5	8	complement(111967198..111981855)	14658	6.59216	6.69884	6.74066	6.93213	7.07578	6.91284	6.67722	0.0765743	6.97358	0.0890286	UBA5	ubiquitin-like modifier activating enzyme 5	Cytoplasm	enzyme	Common_Between_RNAseq_&_Microarray
G14332	Dnajc13	8	complement(112084846..112177085)	92240	3.48137	3.49163	3.40449	3.57741	3.53513	3.50502	3.45916	0.0476262	3.53919	0.036367	DNAJC13	DnaJ (Hsp40) homolog, subfamily C, member 13	Cytoplasm	other	Common_Between_RNAseq_&_Microarray
G14338	Mrpl3	8	112989706..113013066	23361	4.78377	4.76127	4.78404	4.76551	4.73308	4.69022	4.77636	0.0130679	4.7296	0.0377669	MRPL3	mitochondrial ribosomal protein L3	Cytoplasm	other	Common_Between_RNAseq_&_Microarray
G14339	Nudt16	8	complement(113059261..113061297)	2037	3.31812	3.25304	3.37486	3.59063	3.43618	3.37486	3.31534	0.0609549	3.46722	0.111183	NUDT16	nudix (nucleoside diphosphate linked moiety X)-type motif 16	Nucleus	enzyme	Common_Between_RNAseq_&_Microarray
G14346	Atp2c1	8	complement(113331596..113398299)	66704	6.10988	6.28383	5.99909	6.13586	6.02813	5.95722	6.13094	0.14353	6.0404	0.089953	ATP2C1	ATPase, Ca++ transporting, type 2C, member 1	Cytoplasm	transporter	Common_Between_RNAseq_&_Microarray
G14350	PIK3R4	8	113675822..113725967	50146	4.23402	4.27631	4.04409	4.26096	4.12872	3.97415	4.18481	0.123688	4.12128	0.143549	PIK3R4	phosphoinositide-3-kinase, regulatory subunit 4	Cytoplasm	kinase	Common_Between_RNAseq_&_Microarray
G14356	ENSRNOG00000048441	8	114231117..114247514	16398	4.71264	4.7151	4.49646	4.59275	4.48042	4.30468	4.6414	0.125533	4.45928	0.145193	Wdr82	WD repeat domain 82	Nucleus	other	Common_Between_RNAseq_&_Microarray
G14358	Ppm1m	8	complement(114252464..114256314)	3851	3.11505	3	3.01147	3	3	3	3.04217	0.0633723	3	0	Ppm1m	protein phosphatase, Mg2+/Mn2+ dependent, 1M	Nucleus	phosphatase	RNAseq_Specific
G14359	Twf2	8	114259815..114272429	12615	3.936	3.82186	3.86953	3.7593	3.79559	3.78835	3.8758	0.0573283	3.78108	0.0192071	Twf2	twinfilin actin-binding protein 2	Plasma Membrane	other	RNAseq_Specific
G14361	Alas1	8	complement(114289621..114299701)	10081	4.37338	4.47164	4.40136	4.62937	4.53236	4.81308	4.41546	0.0506235	4.65827	0.142573	Alas1	aminolevulinate, delta-, synthase 1	Cytoplasm	enzyme	Common_Between_RNAseq_&_Microarray
G14363	Dusp7	8	114436772..114442403	5632	3.52828	3.43416	3.11589	3.46256	3.27852	3.33035	3.35944	0.216108	3.35715	0.0949025	DUSP7	dual specificity phosphatase 7	Cytoplasm	phosphatase	Common_Between_RNAseq_&_Microarray
G14364	Rpl29	8	114495444..114497490	2047	7.6826	7.6826	7.74597	7.2452	7.47851	7.53528	7.70372	0.0365889	7.41967	0.153734	Rpl29 (includes others)	ribosomal protein L29	Cytoplasm	other	Common_Between_RNAseq_&_Microarray
G14365	Acy1	8	complement(114498901..114503595)	4695	4.85993	4.51071	4.70409	4.1488	4.20972	4.10835	4.69157	0.174946	4.15562	0.0510275	ACY1	aminoacylase 1	Cytoplasm	peptidase	Common_Between_RNAseq_&_Microarray
G14366	Abhd14a	8	complement(114505677..114513516)	7840	3.1184	3.11256	3.37902	3	3.0659	3	3.20333	0.152185	3.02197	0.0380484	ABHD14A	abhydrolase domain containing 14A	Cytoplasm	enzyme	RNAseq_Specific
G14367	Abhd14b	8	114514600..114518645	4046	4.3014	4.46772	4.42405	3.8008	3.89104	3.52332	4.39772	0.0862292	3.73839	0.19164	ABHD14B	abhydrolase domain containing 14B	Cytoplasm	enzyme	Common_Between_RNAseq_&_Microarray
G14368	Pcbp4	8	114519757..114529993	10237	6.02303	5.94451	5.88643	5.81737	5.75208	5.98834	5.95132	0.0685557	5.8526	0.122006	PCBP4	poly(rC) binding protein 4	Nucleus	other	Common_Between_RNAseq_&_Microarray
G14371	Rrp9	8	114544186..114552838	8653	3.8396	3.63833	3.82084	3.67715	3.70013	3.70508	3.76626	0.111186	3.69412	0.0149032	RRP9	ribosomal RNA processing 9, small subunit (SSU) processome component, homolog (yeast)	Nucleus	other	RNAseq_Specific
G14378	Tex264	8	complement(114720831..114748300)	27470	4.87306	4.74875	4.80432	4.65563	4.73633	4.80432	4.80871	0.0622708	4.73209	0.0744353	TEX264	testis expressed 264	Extracellular Space	other	Common_Between_RNAseq_&_Microarray
G14381	Vprbp	8	114907024..114974112	67089	3.52332	3.57012	3.62375	3.67318	3.6901	3.59959	3.5724	0.0502556	3.65429	0.0481203	VPRBP	Vpr (HIV-1) binding protein	Nucleus	other	RNAseq_Specific
[truncated: 7,871 more rows]
